# Supplementary material for: Transcriptional Profiling of Rat Prefrontal Cortex after Acute Inescapable Footshock Stress
Source: MDPI journal article supplement (doi:10.3390/genes14030740), 2023-03-17
Supplement: s1 [file s1]

# Supplementary

A

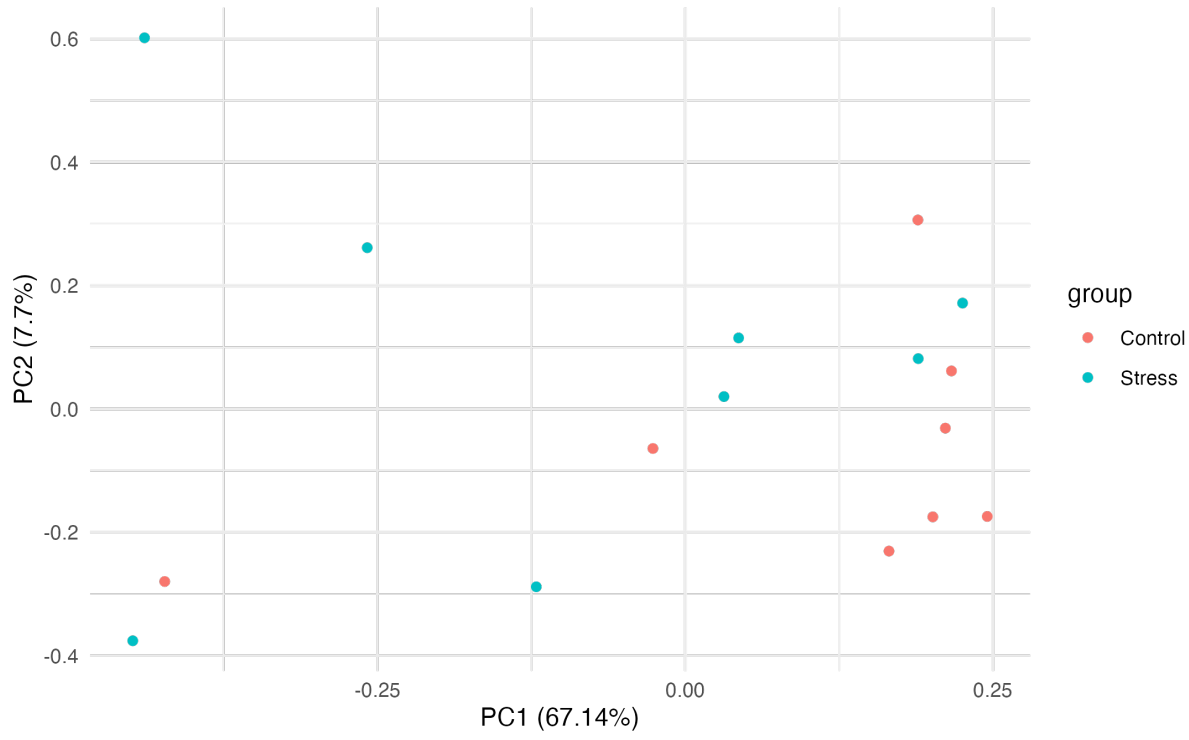

B

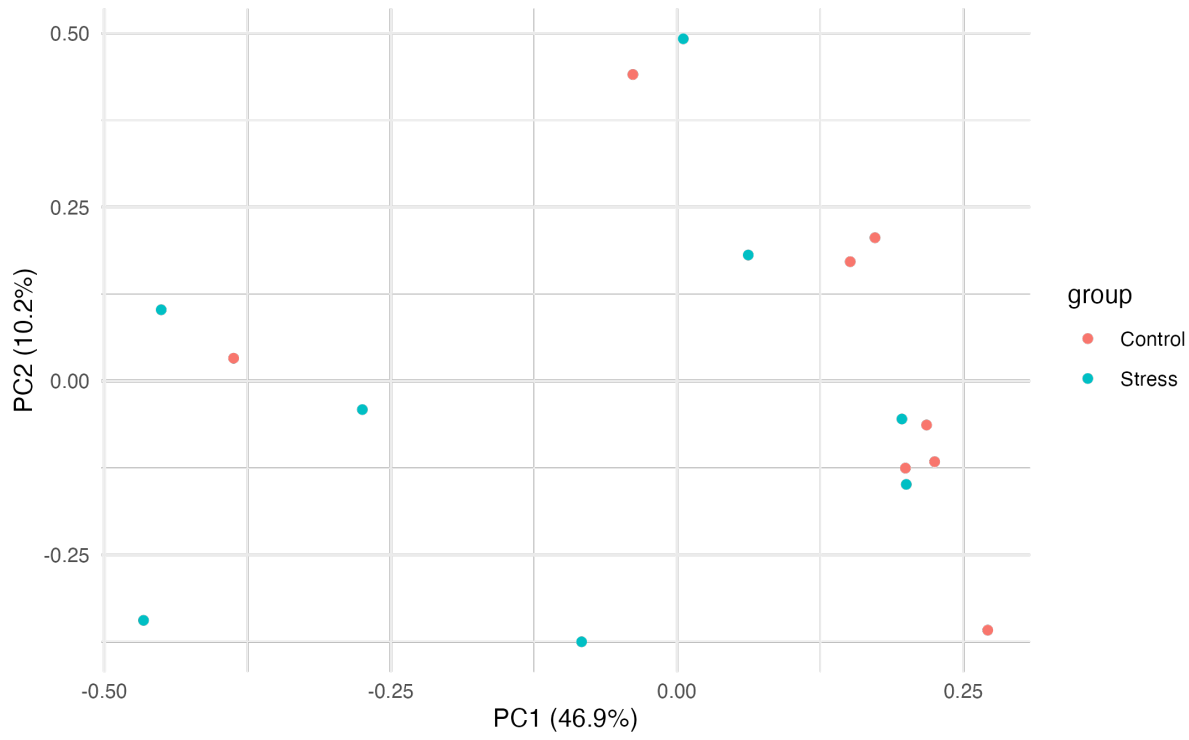

Figure S1 **Principal Component Analysis for PFC samples immediately after FS stress.** PCA plot of A) top 500 most variable genes and B) all genes respectively.

B

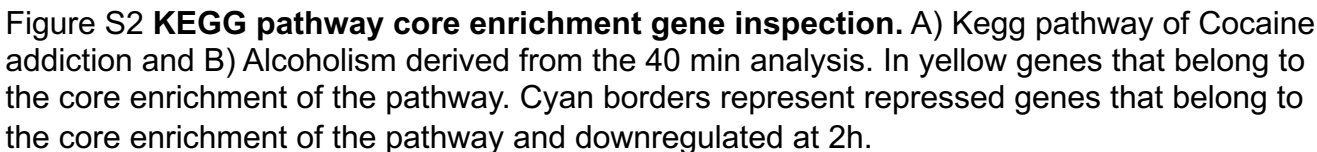

A

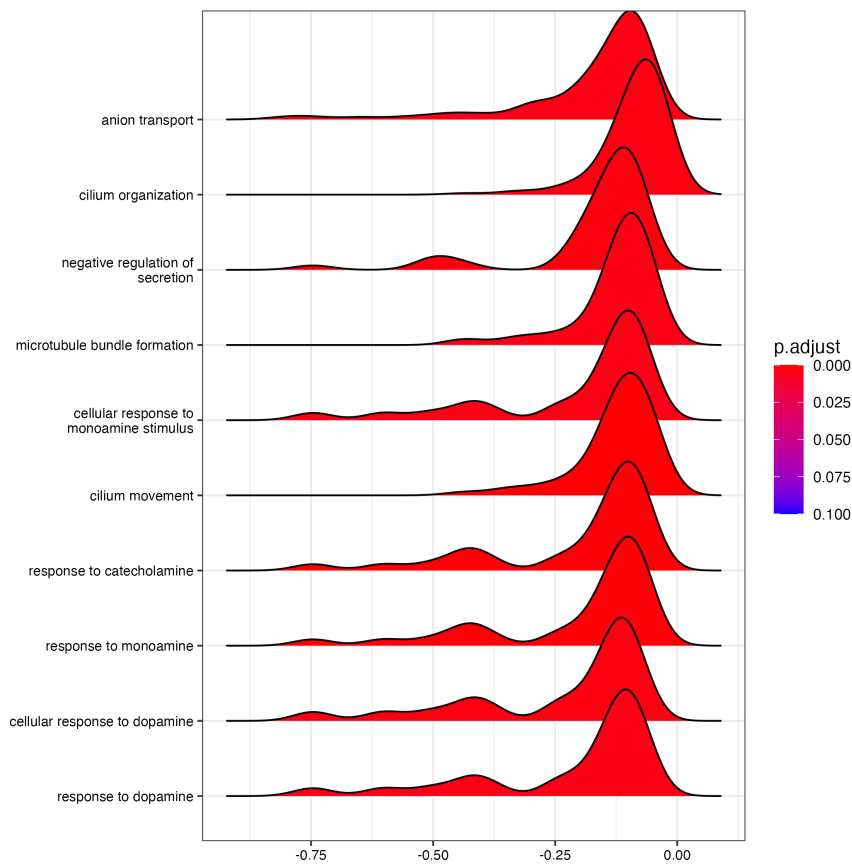

B

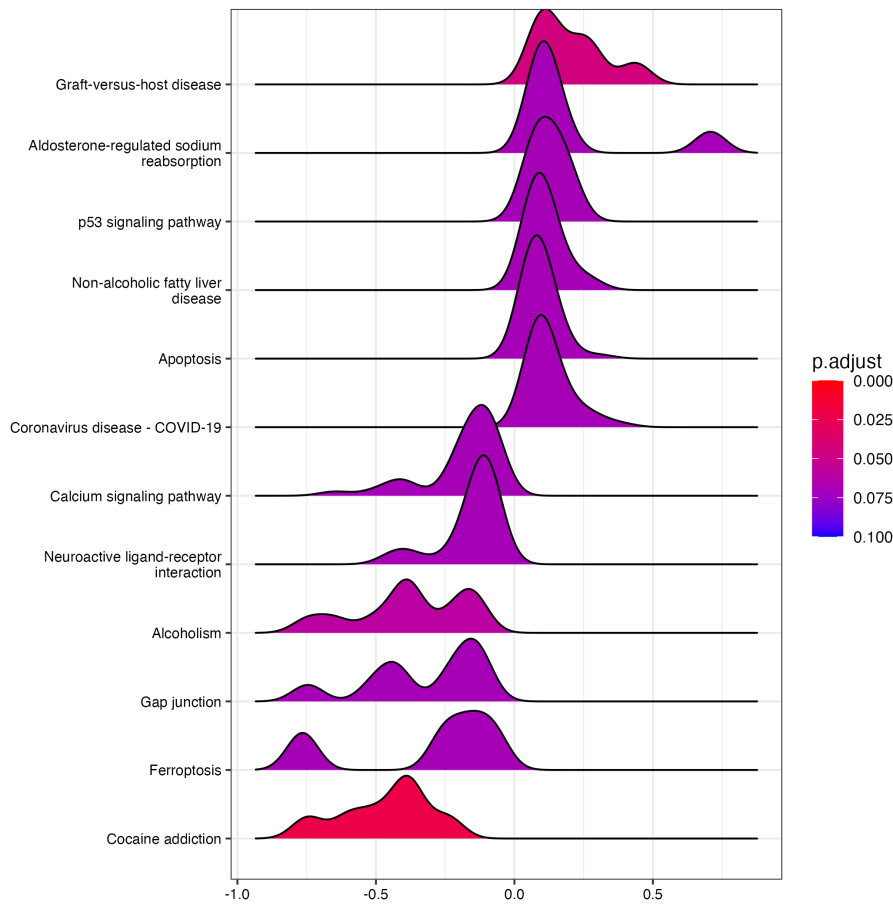

Figure S3 **GSEA in the PFC of rats 2 hours after FS stress**. Density distribution of log2 fold changes of the core enriched genes belonging to the gene sets reported. On the x axis, the log2 fold change is reported. A) Top 10 enriched GO Biological Process terms. B) KEGG enriched pathways with adjusted p-value  $\leq 0.1$ . N = 6 FS vs N = 6 CTR.

A

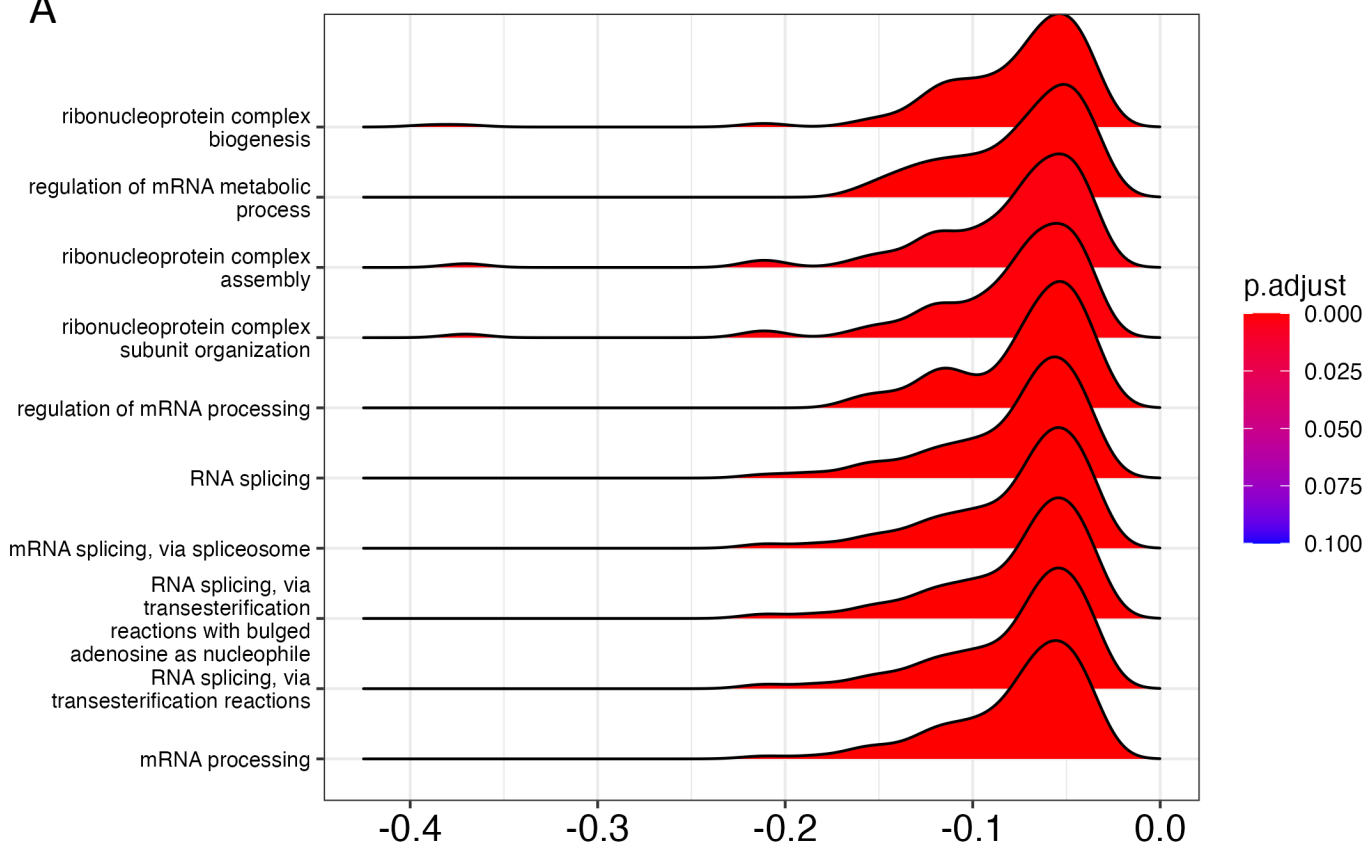

B

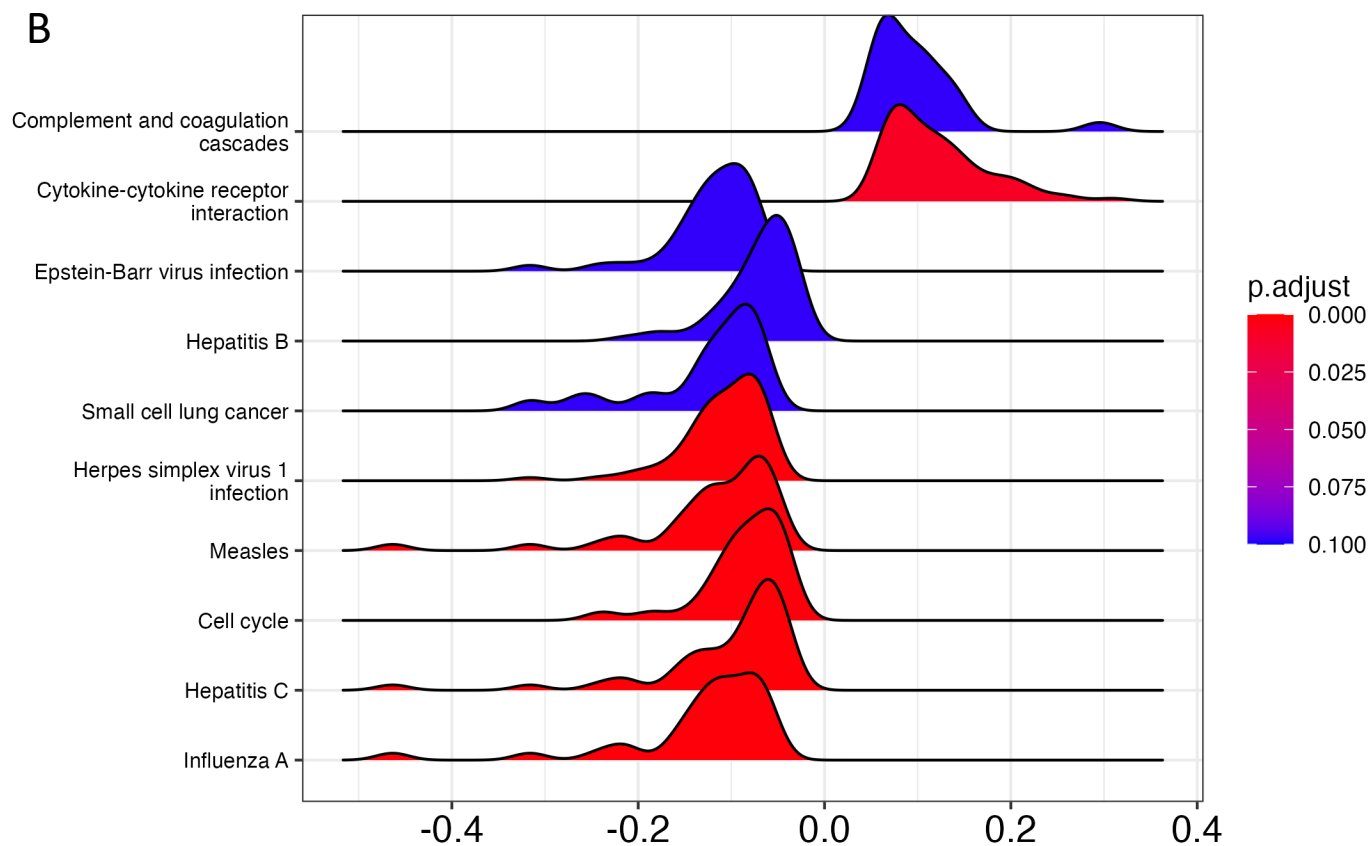

**Figure S4 GSEA in the PFC of rats 24 hour after FS stress.** Density distribution of log<sub>2</sub> fold changes of the core enriched genes belonging to the gene sets reported. On the x axis, the log<sub>2</sub> fold change is reported. A) Top 10 enriched GO Biological Process terms. B) KEGG enriched pathways with adjusted p-value  $\leq 0.1$ . N = 5 FS vs N = 5 CTR.
