# Supplementary material for: Transcriptional Profiling of Rat Prefrontal Cortex after Acute Inescapable Footshock Stress
Source: Genes (Basel). 2023 Mar 17;14(3):740. doi: 10.3390/genes14030740 (PMC10048409; doi:10.3390/genes14030740)
Supplement: Supplementary file 1 [file genes-14-00740-s001.zip › supplementary-tables_Rev1.xlsx]

## Sheet: S1 limma 40min
Table S1: Summary of limma statistics from differential expression analysis between stress and non stress rats immediately after stress (40 min)
Columns	PROBEID: Agilet Probe ID; SYMBOL: official Gene Symbol; GENENAME: official Gene Name; logFC: log fold change Stress vs Controls; AveExpr: average Expression; t: Limma T statistics; P.Value: test p-value; adj.P.Val: Benjamini & Hochberg adjusted p-value
PROBEID	SYMBOL	GENENAME	logFC	AveExpr	t	P.Value	adj.P.Val
10716939	Adgrg6	adhesion G protein-coupled receptor G6	0.321074	4.80765	4.80339	0.000150872	0.500163
10806946	Hhip	Hedgehog-interacting protein	0.594514	5.674	4.61929	0.000224684	0.500163
10806687	Yju2b	YJU2 splicing factor homolog B	-0.234402	7.03002	-4.45058	0.000324407	0.500163
10826607	Ugt8	UDP glycosyltransferase 8	0.575171	7.53617	4.41886	0.000347682	0.500163
10707707	Mtmr10	myotubularin related protein 10	0.301058	5.51049	4.4037	0.000359394	0.500163
10832920	Ddit4	DNA-damage-inducible transcript 4	0.358543	5.85903	4.38763	0.000372249	0.500163
10865715	Cd9	CD9 molecule	0.340098	7.14825	4.35812	0.000397073	0.500163
10855187	Zfp398	zinc finger protein 398	-0.226666	5.87458	-4.29597	0.000454984	0.500163
10843072	Tcea2	transcription elongation factor A2	-0.236906	7.71075	-4.24995	0.000503316	0.500163
10740832	Zfp13	zinc finger protein 13	-0.288832	6.06986	-4.14597	0.000632489	0.500163
10713081	Ap5b1	adaptor related protein complex 5 subunit beta 1	-0.290148	5.1844	-4.12981	0.000655379	0.500163
10792421	Plat	plasminogen activator, tissue type	0.403252	8.18568	4.1062	0.000690331	0.500163
10926113	Kat2b	lysine acetyltransferase 2B	0.246563	6.6209	4.10132	0.000697785	0.500163
10845470	Baz2b	bromodomain adjacent to zinc finger domain, 2B	0.216821	6.67391	4.07182	0.000744606	0.500163
10705753	Ppp1r14a	protein phosphatase 1, regulatory (inhibitor) subunit 14A	0.350662	5.80765	4.04221	0.000794775	0.500163
10869847	Focad	focadhesin	-0.24136	7.3041	-4.035	0.000807503	0.500163
10849290	Gatm	glycine amidinotransferase	0.221902	7.34932	3.95142	0.000970848	0.500163
10890024	Nfkbia	NFKB inhibitor alpha	0.425536	6.17786	3.94697	0.000980406	0.500163
10801290	Ndfip1	Nedd4 family interacting protein 1	-0.260453	9.14503	-3.93152	0.00101438	0.500163
10934378	Gjb1	gap junction protein, beta 1	0.307094	5.49047	3.91831	0.00104438	0.500163
10859382	Dera	deoxyribose-phosphate aldolase	0.234663	5.81643	3.91142	0.00106036	0.500163
10717813	Cnksr3	Cnksr family member 3	0.298723	4.61894	3.90156	0.00108368	0.500163
10733829	Sh3bp5l	SH3 binding domain protein 5 like	-0.228401	5.5228	-3.89047	0.00111051	0.500163
10801884	Slc12a2	solute carrier family 12 member 2	0.299589	7.3721	3.89038	0.00111074	0.500163
10898968	Pfkm	phosphofructokinase, muscle	-0.200662	8.59244	-3.88637	0.0011206	0.500163
10867657	Gem	GTP binding protein overexpressed in skeletal muscle	0.321476	4.5257	3.87747	0.00114282	0.500163
10889339	Adam17	ADAM metallopeptidase domain 17	0.181441	5.79395	3.83924	0.0012434	0.500163
10859262	Apold1	apolipoprotein L domain containing 1	0.586807	4.7068	3.79247	0.00137855	0.500163
10720219	Med29	mediator complex subunit 29	-0.195894	7.03473	-3.76764	0.00145619	0.500163
10728647	Myrf	myelin regulatory factor	0.425323	6.60547	3.74084	0.00154486	0.500163
10885524	Plekhh1	pleckstrin homology, MyTH4 and FERM domain containing H1	0.342613	5.25217	3.7373	0.00155698	0.500163
10854626	Luc7l2	LUC7-like 2 pre-mRNA splicing factor	0.216409	7.37525	3.73043	0.00158075	0.500163
10861358	Gpr37	G protein-coupled receptor 37	0.375736	7.67987	3.71515	0.00163495	0.500163
10794186	Thoc3	THO complex 3	-0.202339	5.5128	-3.71494	0.00163572	0.500163
10826130	Prpf38b	pre-mRNA processing factor 38B	0.231742	7.17456	3.70613	0.0016678	0.500163
10842577	Rae1	ribonucleic acid export 1	-0.215598	6.67967	-3.6886	0.00173356	0.500163
10740278	Tbcd	tubulin folding cofactor D	-0.192743	6.61892	-3.66182	0.00183904	0.500163
10706437	Klk6	kallikrein related-peptidase 6	0.513784	7.05618	3.65159	0.001881	0.500163
10843333	Nelfb	negative elongation factor complex member B	-0.243877	6.94698	-3.63559	0.00194854	0.500163
10778196	Ccdc117	coiled-coil domain containing 117	0.298502	5.75054	3.62942	0.0019752	0.500163
10745342	Evi2a	ecotropic viral integration site 2A	0.389863	6.88859	3.62378	0.0019999	0.500163
10910170	Tmem266	transmembrane protein 266	-0.509289	5.60212	-3.61055	0.00205911	0.500163
10871103	Efcab14	EF-hand calcium binding domain 14	0.246971	8.32002	3.60783	0.00207147	0.500163
10835303	Gpr107	G protein-coupled receptor 107	-0.157019	7.02008	-3.60268	0.00209514	0.500163
10903736	Enpp2	ectonucleotide pyrophosphatase/phosphodiesterase 2	0.277929	8.86186	3.57993	0.00220283	0.500163
10787303	Mvb12a	multivesicular body subunit 12A	-0.228932	5.17035	-3.55887	0.00230741	0.500163
10903689	Rad21	RAD21 cohesin complex component	0.219462	7.86061	3.54947	0.00235567	0.500163
10760813	Gjc3	gap junction protein, gamma 3	0.277459	5.99145	3.54938	0.00235617	0.500163
10765040	Gas5	growth arrest specific 5	0.285238	8.95072	3.5461	0.00237322	0.500163
10705825	Zfp382	zinc finger protein 382	-0.204166	5.73276	-3.53256	0.00244507	0.500163
10779342	Oxsm	3-oxoacyl-ACP synthase, mitochondrial	-0.294966	4.83866	-3.53136	0.00245155	0.500163
10732302	Clcn7	chloride voltage-gated channel 7	-0.239868	6.03623	-3.51507	0.00254103	0.500163
10818291	Gstm5	glutathione S-transferase, mu 5	-0.221828	7.73798	-3.51254	0.00255522	0.500163
10903061	Shmt2	serine hydroxymethyltransferase 2	-0.190637	6.182	-3.50693	0.00258699	0.500163
10849700	Mal	mal, T-cell differentiation protein	0.419472	8.3884	3.50682	0.00258761	0.500163
10937734	Pir	pirin	-0.188812	4.94561	-3.50178	0.00261643	0.500163
10842538	Rtfdc1	replication termination factor 2 domain containing 1	-0.25275	7.01797	-3.50026	0.0026252	0.500163
10858207	Dcp1b	decapping mRNA 1B	-0.200006	5.8905	-3.50026	0.00262521	0.500163
10849048	Ppip5k1	diphosphoinositol pentakisphosphate kinase 1	-0.225811	6.86473	-3.49443	0.00265909	0.500163
10801683	Prr16	proline rich 16	-0.400735	7.19533	-3.47851	0.00275385	0.500163
10709691	Ppfibp2	PPFIA binding protein 2	0.309553	4.95432	3.4752	0.00277398	0.500163
10810635	Zdhhc1	zinc finger, DHHC-type containing 1	-0.206693	6.53848	-3.45973	0.00286995	0.500163
10810791	Ddx28	DEAD-box helicase 28	-0.205721	4.21935	-3.45799	0.002881	0.500163
10912861	Rrp9	ribosomal RNA processing 9, U3 small nucleolar RNA binding protein	-0.196979	5.17973	-3.45774	0.00288255	0.500163
10906092	Tubgcp6	tubulin, gamma complex associated protein 6	-0.188873	5.32961	-3.45475	0.00290158	0.500163
10872829	Rsrp1	arginine and serine rich protein 1	0.294951	7.92325	3.44068	0.0029927	0.500163
10890683	Zbtb25	zinc finger and BTB domain containing 25	-0.151759	5.71589	-3.4234	0.00310848	0.500163
10871203	Pomgnt1	protein O-linked mannose N-acetylglucosaminyltransferase 1 (beta 1,2-)	-0.171833	6.54489	-3.42246	0.0031149	0.500163
10893774	Klf16	Kruppel-like factor 16	-0.249119	7.00278	-3.4119	0.00318804	0.500163
10883880	Grhl1	grainyhead-like transcription factor 1	-0.430356	4.11216	-3.40899	0.00320848	0.500163
10726067	Zfp668	zinc finger protein 668	-0.260717	5.0307	-3.40802	0.00321532	0.500163
10915751	Anln	anillin, actin binding protein	0.45752	5.72519	3.38507	0.00338143	0.500163
10783818	Ipo4	importin 4	-0.232787	6.09082	-3.38279	0.00339838	0.500163
10850744	Psmf1	proteasome inhibitor subunit 1	-0.219564	7.69074	-3.37618	0.00344805	0.500163
10935064	Plp1	proteolipid protein 1	0.257957	11.6917	3.34127	0.00372237	0.500163
10829780	Arid5b	AT-rich interaction domain 5B	-0.213949	7.79492	-3.34066	0.00372733	0.500163
10939289	Timm8a1	translocase of inner mitochondrial membrane 8A1	0.188356	6.69612	3.33839	0.00374595	0.500163
10842833	Mrgbp	MRG domain binding protein	0.173395	5.28879	3.3286	0.00382711	0.500163
10880583	Clic4	chloride intracellular channel 4	0.43846	7.13938	3.32194	0.00388338	0.500163
10844441	Slc2a8	solute carrier family 2 member 8	-0.223999	6.57533	-3.31618	0.00393271	0.500163
10713050	Fibp	FGF1 intracellular binding protein	-0.276134	6.48957	-3.31495	0.00394329	0.500163
10897854	Adsl	adenylosuccinate lyase	-0.171788	6.69407	-3.30873	0.00399734	0.500163
10770577	Tgfb2	transforming growth factor, beta 2	0.351458	6.90254	3.308	0.00400372	0.500163
10734382	Pmp22	peripheral myelin protein 22	0.22227	7.60555	3.30507	0.00402953	0.500163
10831728	Vps52	VPS52 subunit of GARP complex	-0.335267	7.22806	-3.29929	0.00408082	0.500163
10762495	Wsb2	WD repeat and SOCS box-containing 2	-0.288478	9.41905	-3.29704	0.00410099	0.500163
10780343	Cpne6	copine 6	-0.425039	8.93628	-3.29109	0.00415475	0.500163
10911042	Ciao2a	cytosolic iron-sulfur assembly component 2A	0.264428	5.19799	3.2884	0.00417925	0.500163
10712687	RGD1311946	similar to RIKEN cDNA 1810055G02	-0.332899	6.0162	-3.28452	0.00421486	0.500163
10911309	Gtf2a2	general transcription factor 2A subunit 2	0.225716	4.131	3.28291	0.00422969	0.500163
10915910	Jam3	junctional adhesion molecule 3	0.256509	6.02959	3.27954	0.00426104	0.500163
10737957	Stard3	StAR-related lipid transfer domain containing 3	-0.370346	7.25652	-3.27407	0.00431235	0.500163
10936346	Lonrf3	LON peptidase N-terminal domain and ring finger 3	0.272111	5.25804	3.27052	0.00434596	0.500163
10758883	Rfc5	replication factor C subunit 5	-0.191234	4.84919	-3.26543	0.00439453	0.500163
10881885	Vamp3	vesicle-associated membrane protein 3	0.169869	6.00145	3.25992	0.00444776	0.500163
10817898	Tspan2	tetraspanin 2	0.352226	8.39495	3.25746	0.0044718	0.500163
10712867	Pc	pyruvate carboxylase	-0.21407	6.62055	-3.25639	0.00448224	0.500163
10882025	Dffb	DNA fragmentation factor subunit beta	-0.19757	4.77247	-3.255	0.00449589	0.500163
10741212	Tbl3	transducin (beta)-like 3	-0.201203	5.23317	-3.24595	0.00458567	0.500163
10876520	Exosc3	exosome component 3	0.170942	4.90067	3.24484	0.00459681	0.500163
10758368	Zcchc8	zinc finger CCHC-type containing 8	-0.21693	6.2463	-3.23759	0.00467019	0.500163
10877069	Lpar1	lysophosphatidic acid receptor 1	0.41355	7.23984	3.237	0.00467616	0.500163
10812470	Serinc5	serine incorporator 5	0.300752	7.22209	3.23591	0.00468727	0.500163
10894640	LOC691921	hypothetical protein LOC691921	-0.203491	5.31906	-3.23004	0.00474779	0.500163
10904169	Ndrg1	N-myc downstream regulated 1	0.343407	7.60272	3.22905	0.00475805	0.500163
10897186	Cyc1	cytochrome c-1	-0.220233	7.95678	-3.22437	0.00480689	0.500163
10922783	Map4k4	mitogen-activated protein kinase kinase kinase kinase 4	0.242665	7.13517	3.2229	0.00482233	0.500163
10862338	Ezh2	enhancer of zeste 2 polycomb repressive complex 2 subunit	0.304028	4.32515	3.20933	0.00496729	0.500163
10881648	Pex14	peroxisomal biogenesis factor 14	-0.280522	5.6816	-3.20385	0.00502702	0.500163
10828409	Ring1	ring finger protein 1	-0.234074	5.76598	-3.2019	0.00504841	0.500163
10787588	Ddx49	DEAD-box helicase 49	-0.195307	5.65389	-3.20002	0.00506918	0.500163
10790670	Klf2	Kruppel-like factor 2	0.316122	5.61777	3.19847	0.00508636	0.500163
10781554	Tpt1	tumor protein, translationally-controlled 1	0.128769	9.67555	3.19548	0.00511953	0.500163
10890206	Rpl10l	ribosomal protein L10-like	-0.201407	4.02869	-3.19429	0.00513284	0.500163
10735344	Kif1c	kinesin family member 1C	0.252781	6.18603	3.19199	0.0051587	0.500163
10891080	Mideas	mitotic deacetylase associated SANT domain protein	0.224354	4.46608	3.19029	0.00517778	0.500163
10933349	Egfl6	EGF-like-domain, multiple 6	0.298765	4.3724	3.18552	0.00523195	0.500163
10803238	Npc1	NPC intracellular cholesterol transporter 1	0.215871	7.03684	3.18489	0.00523917	0.500163
10759129	Svop	SV2 related protein	-0.338007	7.5634	-3.16829	0.00543206	0.500163
10894628	Glt8d2	glycosyltransferase 8 domain containing 2	-0.502642	4.64425	-3.16308	0.00549395	0.500163
10893466	Gna11	G protein subunit alpha 11	-0.188625	7.41994	-3.15928	0.00553958	0.500163
10911882	Myo6	myosin VI	0.239818	7.24326	3.15567	0.00558334	0.500163
10750188	Olig2	oligodendrocyte transcription factor 2	0.256256	5.96671	3.15425	0.0056006	0.500163
10715400	Pyroxd2	pyridine nucleotide-disulphide oxidoreductase domain 2	-0.236706	4.0706	-3.1527	0.00561953	0.500163
10865129	Wnk1	WNK lysine deficient protein kinase 1	0.204844	8.71937	3.14883	0.00566701	0.500163
10809167	Katnb1	katanin regulatory subunit B1	-0.149564	6.42485	-3.14159	0.00575695	0.500163
10781927	Slain1	SLAIN motif family, member 1	0.279726	7.764	3.14007	0.00577605	0.500163
10765542	B4galt3	beta-1,4-galactosyltransferase 3	-0.189833	8.20552	-3.12896	0.00591731	0.500163
10829639	Smarcb1	SWI/SNF related, matrix associated, actin dependent regulator of chromatin, subfamily b, member 1	-0.224998	6.6269	-3.12796	0.00593013	0.500163
10902692	Lemd3	LEM domain containing 3	-0.237321	5.04304	-3.12608	0.00595439	0.500163
10757566	Lrwd1	leucine-rich repeats and WD repeat domain containing 1	-0.139123	5.62871	-3.12549	0.00596207	0.500163
10940634	Azin2	antizyme inhibitor 2	-0.265076	5.31257	-3.1244	0.00597618	0.500163
10939516	Tsc22d3	TSC22 domain family, member 3	0.248802	6.14135	3.12051	0.00602694	0.500163
10931919	Lamp2	lysosomal-associated membrane protein 2	0.172851	9.01041	3.11752	0.00606623	0.500163
10760024	Mtus2	microtubule associated scaffold protein 2	-0.201524	6.40453	-3.11084	0.0061548	0.500163
10728136	Vps51	VPS51 subunit of GARP complex	-0.185072	5.70017	-3.10856	0.00618537	0.500163
10917209	Pts	6-pyruvoyl-tetrahydropterin synthase	-0.327567	4.56955	-3.10605	0.00621922	0.500163
10893961	Tmem259	transmembrane protein 259	-0.180268	8.72775	-3.10268	0.00626481	0.500163
10755890	Spidr	scaffold protein involved in DNA repair	0.241508	4.80991	3.10267	0.00626501	0.500163
10921910	Enpp4	ectonucleotide pyrophosphatase/phosphodiesterase 4	0.237426	6.68882	3.10089	0.0062892	0.500163
10908968	Cdon	cell adhesion associated, oncogene regulated	0.181301	5.37934	3.09622	0.0063533	0.500163
10927809	Hibch	3-hydroxyisobutyryl-CoA hydrolase	-0.170803	5.25314	-3.08823	0.00646442	0.500163
10893896	RGD1359127	similar to RIKEN cDNA 2310011J03	-0.273304	5.58638	-3.08594	0.00649663	0.500163
10717331	Sgk1	serum/glucocorticoid regulated kinase 1	0.463476	7.97244	3.08417	0.00652154	0.500163
10713610	Stx5	syntaxin 5	-0.165232	6.42331	-3.0822	0.00654945	0.500163
10827673	Mog	myelin oligodendrocyte glycoprotein	0.419998	7.92972	3.07783	0.00661186	0.500163
10905248	Eif3d	eukaryotic translation initiation factor 3, subunit D	-0.132967	7.06436	-3.07719	0.00662097	0.500163
10884189	Atxn7l1	ataxin 7-like 1	-0.291817	6.71806	-3.07508	0.00665132	0.500163
10900545	Ndufs7	NADH:ubiquinone oxidoreductase core subunit S7	-0.171299	8.29225	-3.07409	0.00666558	0.500163
10938155	Prrg1	proline rich and Gla domain 1	0.215782	6.69232	3.0723	0.00669152	0.500163
10732427	Lmf1	lipase maturation factor 1	-0.232043	6.16562	-3.0695	0.00673221	0.500163
10852852	Abcf2	ATP binding cassette subfamily F member 2	-0.152269	7.73668	-3.06848	0.00674716	0.500163
10812922	Elovl7	ELOVL fatty acid elongase 7	0.223328	6.18454	3.06265	0.0068329	0.500163
10905915	Rtl6	retrotransposon Gag like 6	-0.259331	7.92125	-3.05789	0.00690372	0.500163
10836321	Pkp4	plakophilin 4	0.185203	8.46075	3.04917	0.00703536	0.500163
10905116	Lrrc24	leucine rich repeat containing 24	-0.398451	5.85264	-3.04703	0.00706788	0.500163
10888980	Tmem214	transmembrane protein 214	-0.164976	7.38447	-3.04654	0.00707552	0.500163
10847572	Cd82	Cd82 molecule	0.286201	6.69068	3.0425	0.00713765	0.500163
10887679	Vipr2	vasoactive intestinal peptide receptor 2	-0.256802	4.4803	-3.04226	0.00714133	0.500163
10708903	Thap12	THAP domain containing 12	0.165573	5.41876	3.0421	0.00714369	0.500163
10777450	Afap1	actin filament associated protein 1	0.224087	5.63969	3.0346	0.00726064	0.500163
10855637	Wipf3	WAS/WASL interacting protein family, member 3	0.386107	7.21466	3.03352	0.00727756	0.500163
10835757	Gsn	gelsolin	0.382848	6.66484	3.02959	0.00733964	0.500163
10720215	Zfp36	zinc finger protein 36	0.266043	4.79375	3.02835	0.00735932	0.500163
10861171	Cttnbp2	cortactin binding protein 2	0.171778	7.83063	3.02215	0.00745873	0.500163
10926415	Klc4	kinesin light chain 4	-0.175642	4.48185	-3.01801	0.00752578	0.500163
10897465	Cyth4	cytohesin 4	-0.1816	5.83836	-3.0175	0.00753395	0.500163
10764626	Ivns1abp	influenza virus NS1A binding protein	0.288673	8.17853	3.00978	0.0076607	0.500163
10859655	Med21	mediator complex subunit 21	0.220122	5.71454	3.00485	0.00774273	0.500163
10740085	Chmp6	charged multivesicular body protein 6	-0.191385	5.62257	-3.00426	0.0077526	0.500163
10802331	Grp	gastrin releasing peptide	-0.856838	4.68278	-3.00405	0.00775599	0.500163
10856871	Smyd5	SMYD family member 5	-0.280262	4.8733	-3.0024	0.00778377	0.500163
10728145	Sac3d1	SAC3 domain containing 1	-0.268342	4.29221	-2.99999	0.00782436	0.500163
10879001	Rnf220	ring finger protein 220	-0.14843	8.84282	-2.99764	0.00786413	0.500163
10919637	Tf	transferrin	0.423804	9.21071	2.99514	0.00790663	0.500163
10829418	Pcbp3	poly(rC) binding protein 3	-0.407582	7.20005	-2.99116	0.00797478	0.500163
10794477	Kif13a	kinesin family member 13A	0.216491	5.39795	2.99074	0.00798207	0.500163
10737125	Ptrh2	peptidyl-tRNA hydrolase 2	-0.190112	4.99231	-2.97977	0.00817315	0.500163
10914318	Mobp	myelin-associated oligodendrocyte basic protein	0.398816	9.67829	2.97864	0.00819304	0.500163
10773553	Haus3	HAUS augmin-like complex, subunit 3	-0.166394	5.13484	-2.97549	0.00824881	0.500163
10815852	Schip1	schwannomin interacting protein 1	-0.282031	5.51503	-2.97506	0.0082565	0.500163
10706712	Nosip	nitric oxide synthase interacting protein	-0.177762	6.42528	-2.97075	0.0083335	0.500163
10940633	Fbxo25	F-box protein 25	-0.200079	7.28918	-2.96946	0.00835675	0.500163
10734045	Drc3	dynein regulatory complex subunit 3	-0.271223	5.50514	-2.96927	0.00836024	0.500163
10708672	Prcp	prolylcarboxypeptidase	0.268967	5.6302	2.96813	0.00838072	0.500163
10847825	Nat10	N-acetyltransferase 10	-0.178759	5.45705	-2.96805	0.0083821	0.500163
10846201	Wipf1	WAS/WASL interacting protein family, member 1	0.234854	5.12572	2.96735	0.00839483	0.500163
10728830	Ccdc86	coiled-coil domain containing 86	-0.177785	5.1238	-2.96717	0.0083981	0.500163
10732465	Ciao3	cytosolic iron-sulfur assembly component 3	-0.224507	5.17347	-2.96649	0.00841041	0.500163
10928229	Clk1	CDC-like kinase 1	0.395793	8.39258	2.96598	0.00841967	0.500163
10940598	Bysl	bystin-like	-0.128514	5.40838	-2.96378	0.00845964	0.500163
10759342	Noc4l	nucleolar complex associated 4 homolog	-0.285956	6.00849	-2.9628	0.00847752	0.500163
10741640	Rab40c	Rab40c, member RAS oncogene family	-0.208363	5.89223	-2.95986	0.00853136	0.500163
10818173	Wdr77	WD repeat domain 77	-0.227852	6.69697	-2.95742	0.00857617	0.500163
10934056	Msn	moesin	0.290331	6.14564	2.94984	0.0087172	0.500163
10738643	Nmt1	N-myristoyltransferase 1	-0.21195	8.49846	-2.9447	0.00881421	0.500163
10855668	Znrf2	zinc and ring finger 2	0.152239	6.00791	2.94465	0.00881515	0.500163
10863477	Htra2	HtrA serine peptidase 2	-0.175135	6.70388	-2.94448	0.00881845	0.500163
10802980	Mbp	myelin basic protein	0.383253	9.80886	2.94431	0.00882155	0.500163
10781496	Lcp1	lymphocyte cytosolic protein 1	0.213368	6.11328	2.94218	0.0088622	0.500163
10833797	Armc2	armadillo repeat containing 2	-0.207894	5.38809	-2.93771	0.00894773	0.500163
10767162	Tmem177	transmembrane protein 177	-0.388863	4.17189	-2.93614	0.00897801	0.500163
10876259	Pigo	phosphatidylinositol glycan anchor biosynthesis, class O	-0.142421	5.55341	-2.9346	0.00900774	0.500163
10834300	Fbxw5	F-box and WD repeat domain containing 5	-0.236388	6.47463	-2.93019	0.00909349	0.500163
10878936	Btbd19	BTB domain containing 19	-0.246854	6.29613	-2.92819	0.00913258	0.500163
10921527	Rpl7l1	ribosomal protein L7-like 1	-0.160525	7.88344	-2.92672	0.00916156	0.500163
10865222	Bid	BH3 interacting domain death agonist	-0.288923	5.42684	-2.92625	0.00917077	0.500163
10826249	Vcam1	vascular cell adhesion molecule 1	0.207972	6.6625	2.92611	0.00917347	0.500163
10708281	Pde8a	phosphodiesterase 8A	0.264264	5.71644	2.9258	0.00917957	0.500163
10732500	Wdr24	WD repeat domain 24	-0.208975	5.66224	-2.92141	0.00926666	0.500163
10795262	Hist1h4b	histone cluster 1 H4 family member B	0.193056	5.44705	2.92113	0.00927226	0.500163
10762600	Gcn1	GCN1 activator of EIF2AK4	-0.139513	6.03589	-2.91889	0.00931695	0.500163
10816179	Sh3d19	SH3 domain containing 19	0.188477	4.72168	2.9181	0.00933275	0.500163
10761491	Fzd10	frizzled class receptor 10	0.297881	4.75649	2.91684	0.00935803	0.500163
10799435	Prkcq	protein kinase C, theta	0.178101	5.36283	2.91603	0.00937423	0.500163
10778082	Mtmr3	myotubularin related protein 3	-0.120316	6.76738	-2.91579	0.00937918	0.500163
10743235	Tom1l2	target of myb1 like 2 membrane trafficking protein	-0.158733	8.35365	-2.91087	0.00947862	0.500163
10726120	Rusf1	RUS family member 1	-0.189432	6.50075	-2.91075	0.00948119	0.500163
10730116	Tctn3	tectonic family member 3	-0.260659	5.45721	-2.9103	0.00949028	0.500163
10897194	Maf1	MAF1 homolog, negative regulator of RNA polymerase III	-0.143359	7.154	-2.90752	0.009547	0.500163
10787619	Rfxank	regulatory factor X-associated ankyrin-containing protein	-0.170764	5.34733	-2.90658	0.00956641	0.500163
10773903	Thoc5	THO complex 5	-0.171466	6.72296	-2.9054	0.00959053	0.500163
10806927	Gab1	GRB2-associated binding protein 1	0.314037	7.03948	2.90022	0.00969769	0.503504
10904910	Sharpin	SHANK-associated RH domain interactor	-0.192871	7.41068	-2.89731	0.00975834	0.504411
10916040	Foxred1	FAD-dependent oxidoreductase domain containing 1	-0.146365	5.71822	-2.88919	0.00992967	0.507248
10807452	Nfatc3	nuclear factor of activated T-cells 3	0.220621	4.98946	2.88484	0.0100227	0.507248
10875154	St18	ST18 C2H2C-type zinc finger transcription factor	0.438688	4.88573	2.88454	0.0100291	0.507248
10759601	Trappc5	trafficking protein particle complex subunit 5	-0.211442	5.69976	-2.88424	0.0100356	0.507248
10812784	Srek1	splicing regulatory glutamic acid and lysine rich protein 1	0.191853	6.43873	2.88324	0.010057	0.507248
10752109	Clcn2	chloride voltage-gated channel 2	-0.161468	6.31539	-2.88247	0.0100738	0.507248
10824305	Sema4a	semaphorin 4A	-0.180219	6.6955	-2.87578	0.0102189	0.510264
10752137	Alg3	ALG3, alpha-1,3- mannosyltransferase	-0.255452	8.43007	-2.87518	0.0102322	0.510264
10895589	Cpm	carboxypeptidase M	0.327337	6.486	2.87093	0.0103256	0.510264
10788175	Stox2	storkhead box 2	0.241585	8.89762	2.87035	0.0103384	0.510264
10889326	Kcnf1	potassium voltage-gated channel modifier subfamily F member 1	-0.310076	7.64352	-2.86974	0.010352	0.510264
10817365	Cdc42se1	CDC42 small effector 1	-0.17765	6.17435	-2.85983	0.0105737	0.515271
10934173	Efnb1	ephrin B1	0.235104	5.51186	2.85728	0.0106315	0.515271
10922257	Eif4g2	eukaryotic translation initiation factor 4, gamma 2	0.106439	9.66074	2.85696	0.0106389	0.515271
10733680	Gpx3	glutathione peroxidase 3	0.48697	6.25135	2.85557	0.0106705	0.515271
10736679	Tmem98	transmembrane protein 98	0.206706	4.96096	2.85437	0.0106979	0.515271
10728377	Otub1	OTU deubiquitinase, ubiquitin aldehyde binding 1	-0.209407	9.66313	-2.84951	0.0108096	0.515271
10797344	Zfp346	zinc finger protein 346	-0.250634	5.90253	-2.84424	0.010932	0.515271
10924304	Ctdsp1	CTD small phosphatase 1	0.230123	5.25792	2.84266	0.0109689	0.515271
10792061	Gsr	glutathione-disulfide reductase	-0.249856	6.41563	-2.84126	0.0110016	0.515271
10809942	Dhps	deoxyhypusine synthase	-0.229012	5.35299	-2.84123	0.0110025	0.515271
10704198	RGD1564617	similar to large subunit ribosomal protein L36a	0.162614	4.39822	2.84026	0.0110252	0.515271
10775338	Pkd2	polycystin 2, transient receptor potential cation channel	0.166624	6.21918	2.83337	0.0111885	0.515271
10909970	Rdx	radixin	0.152656	8.17618	2.83049	0.0112574	0.515271
10865527	Tpi1	triosephosphate isomerase 1	-0.179079	9.91675	-2.82952	0.0112808	0.515271
10924694	Mrpl44	mitochondrial ribosomal protein L44	-0.166029	4.74028	-2.82775	0.0113234	0.515271
10726172	Fgfr2	fibroblast growth factor receptor 2	0.213805	7.54205	2.82647	0.0113545	0.515271
10764221	Csrp1	cysteine and glycine-rich protein 1	0.320067	9.26843	2.82617	0.0113616	0.515271
10934585	Atp7a	ATPase copper transporting alpha	0.164705	4.60047	2.82455	0.0114011	0.515271
10745509	Myo1d	myosin ID	0.356908	6.27158	2.82168	0.0114711	0.515271
10744766	Aspa	aspartoacylase	0.248054	6.05864	2.82156	0.0114739	0.515271
10871737	Nt5c1a	5'-nucleotidase, cytosolic IA	-0.157656	4.06772	-2.81748	0.0115741	0.515271
10762704	Srsf9	serine and arginine rich splicing factor 9	0.246695	4.60699	2.81516	0.0116314	0.515271
10725806	Coro1a	coronin 1A	-0.426251	6.86867	-2.81389	0.0116631	0.515271
10903896	Fbxo32	F-box protein 32	0.281118	6.20465	2.81288	0.0116882	0.515271
10705849	Alkbh6	alkB homolog 6	-0.276339	5.90009	-2.81063	0.0117444	0.515271
10940639	Apod	apolipoprotein D	0.353373	10.373	2.80885	0.011789	0.515271
10811126	Fa2h	fatty acid 2-hydroxylase	0.393781	7.33459	2.80643	0.0118498	0.515271
10940597	Micu1	mitochondrial calcium uptake 1	-0.172185	8.42915	-2.80387	0.0119145	0.515271
10765587	Usf1	upstream transcription factor 1	-0.145234	6.34256	-2.79873	0.0120457	0.515271
10808393	RGD1304884	similar to RIKEN cDNA 6430548M08	-0.12265	8.68454	-2.79867	0.0120472	0.515271
10857140	Tpra1	transmembrane protein adipocyte associated 1	-0.149166	5.83635	-2.7956	0.0121261	0.515271
10871732	Hpcal4	hippocalcin-like 4	-0.228397	9.80735	-2.79378	0.0121731	0.515271
10867539	Chd7	chromodomain helicase DNA binding protein 7	0.252296	4.65519	2.79338	0.0121836	0.515271
10730148	Opalin	oligodendrocytic myelin paranodal and inner loop protein	0.398604	7.01853	2.7926	0.0122038	0.515271
10925443	Asb1	ankyrin repeat and SOCS box-containing 1	-0.186531	6.96861	-2.79158	0.0122304	0.515271
10781029	Kif13b	kinesin family member 13B	0.267558	5.56798	2.7913	0.0122375	0.515271
10750211	Ifngr2	interferon gamma receptor 2	-0.167607	7.23756	-2.78282	0.0124603	0.515271
10894999	Tmcc3	transmembrane and coiled-coil domain family 3	0.256639	5.42949	2.78239	0.0124714	0.515271
10798828	Jcad	junctional cadherin 5 associated	0.232776	7.97407	2.78223	0.0124759	0.515271
10726408	Mki67	marker of proliferation Ki-67	0.503644	4.07819	2.7795	0.0125483	0.515271
10832197	Sik1	salt-inducible kinase 1	0.342246	6.11219	2.7707	0.012785	0.515271
10864158	Rbsn	rabenosyn, RAB effector	-0.18144	6.52219	-2.77052	0.0127901	0.515271
10895861	Ddit3	DNA-damage inducible transcript 3	0.186653	4.5598	2.77041	0.0127929	0.515271
10886714	Ccnk	cyclin K	0.194863	6.98037	2.77012	0.0128009	0.515271
10712706	Chka	choline kinase alpha	0.289499	6.20828	2.76966	0.0128133	0.515271
10926485	Dlk2	delta like non-canonical Notch ligand 2	-0.205609	4.96718	-2.76854	0.0128437	0.515271
10712829	Coro1b	coronin 1B	-0.152857	6.92453	-2.76831	0.0128501	0.515271
10909733	Zpr1	ZPR1 zinc finger	-0.19634	6.94234	-2.76301	0.0129954	0.515271
10853810	Cav2	caveolin 2	0.158531	5.46258	2.76276	0.0130025	0.515271
10891597	Foxn3	forkhead box N3	0.228662	7.12073	2.76074	0.0130582	0.515271
10758448	Psmd9	proteasome 26S subunit, non-ATPase 9	-0.207614	6.69387	-2.76055	0.0130634	0.515271
10791080	Borcs8	BLOC-1 related complex subunit 8	-0.162098	5.61242	-2.74852	0.0134009	0.515271
10908291	Ppan	peter pan homolog	-0.183169	5.70123	-2.74835	0.0134058	0.515271
10893444	Sirt6	sirtuin 6	-0.247533	7.08851	-2.74556	0.0134854	0.515271
10818581	Dph5	diphthamide biosynthesis 5	-0.1828	4.72808	-2.74521	0.0134952	0.515271
10826097	Stxbp3	syntaxin binding protein 3	0.146485	6.70084	2.74437	0.0135194	0.515271
10940579	Dus1l	dihydrouridine synthase 1-like	-0.129123	5.70974	-2.74321	0.0135526	0.515271
10865855	Fkbp4	FKBP prolyl isomerase 4	0.123421	7.78458	2.74245	0.0135745	0.515271
10838043	Syt13	synaptotagmin 13	-0.271473	7.69152	-2.74198	0.013588	0.515271
10712986	Rin1	Ras and Rab interactor 1	-0.29861	7.42075	-2.73895	0.0136753	0.515271
10865077	Lrtm2	leucine-rich repeats and transmembrane domains 2	-0.24788	6.23017	-2.73286	0.0138529	0.515271
10909446	Mcam	melanoma cell adhesion molecule	0.25123	6.5469	2.73153	0.0138917	0.515271
10862444	Tra2a	transformer 2 alpha homolog	0.193262	6.6836	2.72952	0.0139509	0.515271
10883973	Rnaseh1	ribonuclease H1	-0.173617	5.31908	-2.72912	0.013963	0.515271
10810069	Trmt1	tRNA methyltransferase 1	-0.145942	6.0796	-2.728	0.0139961	0.515271
10935031	MGC109340	similar to Microsomal signal peptidase 23 kDa subunit (SPase 22 kDa subunit) (SPC22/23)	0.412564	5.62089	2.72747	0.0140117	0.515271
10751108	Gtpbp8	GTP-binding protein 8 (putative)	-0.16487	4.72424	-2.7233	0.0141357	0.515271
10748935	Hid1	HID1 domain containing	-0.19979	8.10569	-2.72226	0.014167	0.515271
10869106	Slc44a1	solute carrier family 44 member 1	0.209876	8.27204	2.72179	0.014181	0.515271
10889772	Stxbp6	syntaxin binding protein 6	-0.277554	8.3633	-2.72152	0.0141892	0.515271
10864279	Lrig1	leucine-rich repeats and immunoglobulin-like domains 1	0.181153	5.47754	2.7213	0.0141956	0.515271
10822583	Fndc3b	fibronectin type III domain containing 3B	0.268175	5.05887	2.72098	0.0142053	0.515271
10830187	Msl3l2	male-specific lethal 3-like 2 (Drosophila)	-0.261539	4.57682	-2.72002	0.0142342	0.515271
10787351	Colgalt1	collagen beta(1-O)galactosyltransferase 1	-0.162089	5.82976	-2.71921	0.0142586	0.515271
10828194	Skiv2l	Ski2 like RNA helicase	-0.273779	5.50767	-2.71878	0.0142714	0.515271
10899197	Cox14	cytochrome c oxidase assembly factor COX14	-0.20561	7.15298	-2.71805	0.0142934	0.515271
10702224	Enpp3	ectonucleotide pyrophosphatase/phosphodiesterase 3	0.136818	4.42593	2.71628	0.014347	0.515271
10731591	Carhsp1	calcium regulated heat stable protein 1	0.380096	5.35131	2.71612	0.0143518	0.515271
10719253	Npas1	neuronal PAS domain protein 1	-0.217468	4.01812	-2.71574	0.0143635	0.515271
10843132	Polr3k	RNA polymerase III subunit K	-0.210805	7.97341	-2.71566	0.0143659	0.515271
10940496	Rfng	RFNG O-fucosylpeptide 3-beta-N-acetylglucosaminyltransferase	-0.1819	6.16795	-2.71413	0.0144125	0.515271
10860566	Elapor2	endosome-lysosome associated apoptosis and autophagy regulator family member 2	0.224303	5.52265	2.71266	0.0144572	0.515271
10795189	Hist1h2bq	histone cluster 1 H2B family member Q	0.23193	8.72535	2.7114	0.0144957	0.515271
10928902	Tmbim1	transmembrane BAX inhibitor motif containing 1	0.219877	6.04975	2.71068	0.0145177	0.515271
10881801	Tmem201	transmembrane protein 201	-0.216719	6.02621	-2.70696	0.0146323	0.515271
10915726	Ecsit	ECSIT signaling integrator	-0.185812	6.68999	-2.70679	0.0146377	0.515271
10861024	Rps4x	ribosomal protein S4, X-linked	0.141852	8.95967	2.70447	0.0147094	0.515271
10731075	Gfra1	GDNF family receptor alpha 1	0.702573	6.58502	2.7035	0.0147395	0.515271
10805944	Kifc3	kinesin family member C3	-0.147111	5.4509	-2.69751	0.014927	0.515271
10822234	Car2	carbonic anhydrase 2	0.300721	8.59822	2.69696	0.0149444	0.515271
10780360	Pck2	phosphoenolpyruvate carboxykinase 2 (mitochondrial)	-0.208105	4.85505	-2.69633	0.0149643	0.515271
10721563	Cpt1c	carnitine palmitoyltransferase 1c	-0.167181	6.97224	-2.69622	0.0149677	0.515271
10829816	Reep3	receptor accessory protein 3	0.199971	7.1604	2.69456	0.0150203	0.515271
10883303	Hadha	hydroxyacyl-CoA dehydrogenase trifunctional multienzyme complex subunit alpha	0.132688	5.87012	2.69253	0.0150845	0.515271
10845401	Ermn	ermin	0.401383	8.74543	2.6923	0.0150919	0.515271
10860916	Slc25a13	solute carrier family 25 member 13	0.276128	4.96637	2.69084	0.0151386	0.515271
10723441	Fah	fumarylacetoacetate hydrolase	0.274013	5.27892	2.69044	0.0151511	0.515271
10765364	Ildr2	immunoglobulin-like domain containing receptor 2	-0.182385	7.89754	-2.68861	0.0152098	0.515271
10836212	Fmnl2	formin-like 2	0.172369	6.91471	2.6852	0.0153193	0.515271
10844339	Slc25a25	solute carrier family 25 member 25	0.17551	5.76939	2.68506	0.0153239	0.515271
10858362	Bcl2l13	BCL2 like 13	-0.222583	6.4106	-2.68331	0.0153805	0.515271
10720813	Mag	myelin-associated glycoprotein	0.398984	8.07366	2.6823	0.0154135	0.515271
10914853	Arhgap42	Rho GTPase activating protein 42	0.221165	5.14231	2.68105	0.015454	0.515271
10727154	Mrgpre	MAS related GPR family member E	-0.333921	7.27912	-2.68085	0.0154604	0.515271
10720437	Catsperg	cation channel sperm associated auxiliary subunit gamma	-0.246982	4.38681	-2.67983	0.0154936	0.515271
10822631	Cldn11	claudin 11	0.281887	9.51384	2.67679	0.0155931	0.515271
10940445	Pgam1	phosphoglycerate mutase 1	-0.147807	10.2768	-2.67653	0.0156019	0.515271
10752320	Dgcr8	DGCR8 microprocessor complex subunit	0.247597	6.22877	2.67553	0.0156346	0.515271
10877433	Alad	aminolevulinate dehydratase	-0.207963	4.84102	-2.67267	0.0157291	0.515271
10810045	Farsa	phenylalanyl-tRNA synthetase subunit alpha	-0.186598	5.40242	-2.67223	0.0157435	0.515271
10778721	Ahsa2	activator of HSP90 ATPase homolog 2	0.18705	5.0561	2.67161	0.015764	0.515271
10825869	Csf1	colony stimulating factor 1	0.191014	5.91764	2.6714	0.0157713	0.515271
10795679	Gpr137b	G protein-coupled receptor 137B	0.1396	6.01345	2.67089	0.015788	0.515271
10856764	Zfp638	zinc finger protein 638	0.181223	7.03195	2.67081	0.0157907	0.515271
10729777	Ch25h	cholesterol 25-hydroxylase	0.329058	4.05103	2.66864	0.0158629	0.515271
10840990	Tm9sf4	transmembrane 9 superfamily member 4	-0.129956	7.54641	-2.66652	0.0159339	0.515271
10765551	Dedd	death effector domain-containing	-0.2274	7.43158	-2.66367	0.0160295	0.515271
10723523	Folh1	folate hydrolase 1	0.238353	5.9833	2.66281	0.0160587	0.515271
10893226	Pym1	PYM homolog 1, exon junction complex associated factor	-0.20288	5.35898	-2.65987	0.0161581	0.515271
10759641	Camsap3	calmodulin regulated spectrin-associated protein family, member 3	-0.192949	6.2857	-2.65983	0.0161597	0.515271
10764404	Zbtb41	zinc finger and BTB domain containing 41	0.181153	6.89607	2.65918	0.0161816	0.515271
10842707	Fam217b	family with sequence similarity 217, member B	-0.205871	6.57896	-2.65877	0.0161956	0.515271
10793734	Isca1	iron-sulfur cluster assembly 1	-0.115433	8.30053	-2.65703	0.0162548	0.515271
10858277	Ninj2	ninjurin 2	0.387038	5.33005	2.65579	0.0162975	0.515271
10711961	Inpp5a	inositol polyphosphate-5-phosphatase A	0.157743	6.80686	2.65266	0.0164049	0.515271
10755448	Ap2m1	adaptor related protein complex 2 subunit mu 1	-0.150529	10.4969	-2.65082	0.0164686	0.515271
10851689	Zfp335	zinc finger protein 335	-0.227091	6.10086	-2.65077	0.0164702	0.515271
10760580	Brat1	BRCA1-associated ATM activator 1	-0.193797	4.7654	-2.65051	0.0164791	0.515271
10714353	Cemip2	cell migration inducing hyaluronidase 2	-0.320785	5.35425	-2.64841	0.0165519	0.515271
10740466	Nubp1	nucleotide binding protein 1	-0.134989	6.22964	-2.64613	0.0166313	0.515271
10883219	Ost4	oligosaccharyltransferase complex subunit 4, non-catalytic	0.129133	10.3338	2.64598	0.0166368	0.515271
10743715	Shisa6	shisa family member 6	0.363732	6.45674	2.64419	0.0166992	0.515271
10770685	Rps6kc1	ribosomal protein S6 kinase C1	-0.175979	6.11598	-2.64148	0.0167945	0.515271
10926441	Klhdc3	kelch domain containing 3	-0.236966	9.27902	-2.64115	0.0168061	0.515271
10882201	Atad3a	ATPase family, AAA domain containing 3A	-0.199507	5.08294	-2.64045	0.0168309	0.515271
10919953	Grm2	glutamate metabotropic receptor 2	-0.920602	6.39012	-2.63894	0.0168841	0.515271
10705345	Numbl	NUMB-like, endocytic adaptor protein	-0.299677	7.94298	-2.63748	0.0169359	0.515271
10744385	RGD1308134	similar to RIKEN cDNA 1110020A23	-0.157398	5.84137	-2.63697	0.0169541	0.515271
10857541	Lrrn1	leucine rich repeat neuronal 1	0.161753	7.70769	2.63642	0.0169738	0.515271
10701880	Reps1	RALBP1 associated Eps domain containing 1	-0.159433	6.67805	-2.63632	0.0169772	0.515271
10909621	Scn4b	sodium voltage-gated channel beta subunit 4	0.630475	6.37821	2.6362	0.0169815	0.515271
10929321	Dock10	dedicator of cytokinesis 10	0.456796	6.94795	2.63458	0.0170393	0.515271
10883200	Preb	prolactin regulatory element binding	-0.110849	7.0543	-2.63207	0.017129	0.515271
10889931	Sptssa	serine palmitoyltransferase, small subunit A	0.170717	5.85728	2.63112	0.0171632	0.515271
10830030	Lrrc20	leucine rich repeat containing 20	-0.188816	5.04249	-2.62945	0.0172234	0.515271
10897308	Adck5	aarF domain containing kinase 5	-0.15868	5.01433	-2.62893	0.0172423	0.515271
10797918	Pak1ip1	PAK1 interacting protein 1	-0.168439	5.81181	-2.62879	0.0172472	0.515271
10852514	Gmeb2	glucocorticoid modulatory element binding protein 2	-0.183626	6.36609	-2.6281	0.0172725	0.515271
10815512	Rnf13	ring finger protein 13	0.167105	8.30524	2.62783	0.017282	0.515271
10918620	Tcf12	transcription factor 12	0.183653	7.4552	2.62717	0.0173061	0.515271
10849646	Fahd2a	fumarylacetoacetate hydrolase domain containing 2A	-0.132487	6.17277	-2.62632	0.0173369	0.515271
10910204	Pstpip1	proline-serine-threonine phosphatase-interacting protein 1	-0.235827	4.60211	-2.62517	0.0173785	0.515271
10744441	Pelp1	proline, glutamate and leucine rich protein 1	-0.214687	6.13608	-2.62475	0.0173938	0.515271
10872808	Paqr7	progestin and adipoQ receptor family member 7	-0.192969	8.32406	-2.62417	0.0174151	0.515271
10775398	Nudt9	nudix hydrolase 9	-0.179677	6.41746	-2.62376	0.0174299	0.515271
10735436	Xaf1	XIAP associated factor 1	-0.276026	4.12238	-2.62275	0.0174668	0.515271
10837960	Arhgap1	Rho GTPase activating protein 1	-0.223645	8.1342	-2.62009	0.0175646	0.516852
10891229	Rps6kl1	ribosomal protein S6 kinase-like 1	-0.21548	6.58342	-2.61776	0.0176503	0.518067
10751671	Pak2	p21 (RAC1) activated kinase 2	0.141162	7.12029	2.61196	0.0178658	0.521064
10781882	Cln5	CLN5, intracellular trafficking protein	0.158843	4.96902	2.61158	0.01788	0.521064
10831060	Flot1	flotillin 1	-0.272534	6.56796	-2.61142	0.0178862	0.521064
10924672	Acsl3	acyl-CoA synthetase long-chain family member 3	0.12317	9.50865	2.60991	0.0179429	0.521414
10817711	Notch2	notch receptor 2	0.20977	5.96958	2.60814	0.0180092	0.522044
10871479	Elovl1	ELOVL fatty acid elongase 1	0.285223	8.01074	2.60598	0.0180906	0.52264
10864243	Magi1	membrane associated guanylate kinase, WW and PDZ domain containing 1	-0.175835	7.2346	-2.60523	0.0181192	0.52264
10749716	Pycr1	pyrroline-5-carboxylate reductase 1	-0.182267	4.82422	-2.6038	0.0181732	0.522905
10885618	Exd2	exonuclease 3'-5' domain containing 2	-0.251672	7.80279	-2.60235	0.0182285	0.523002
10755798	Ypel1	yippee-like 1	-0.203087	5.14131	-2.60136	0.0182661	0.523002
10784135	Eef1akmt1	EEF1A lysine methyltransferase 1	-0.181796	4.9915	-2.59978	0.0183269	0.523458
10704752	Fbxo46	F-box protein 46	-0.153333	4.76279	-2.59766	0.0184081	0.524497
10731130	Pdzd8	PDZ domain containing 8	0.124454	7.9874	2.59267	0.0186007	0.525959
10710773	Kdm8	lysine demethylase 8	-0.14849	4.7784	-2.59203	0.0186258	0.525959
10801191	Pcdhb12	protocadherin beta 12	-0.205443	5.48809	-2.59122	0.0186573	0.525959
10834190	Man1b1	mannosidase, alpha, class 1B, member 1	-0.151165	6.73993	-2.5909	0.0186698	0.525959
10824242	Hapln2	hyaluronan and proteoglycan link protein 2	0.411225	6.35143	2.5893	0.0187323	0.525959
10913129	Cdhr4	cadherin-related family member 4	0.359633	5.00989	2.58904	0.0187424	0.525959
10729213	Pcsk5	proprotein convertase subtilisin/kexin type 5	-0.230199	4.73582	-2.5874	0.0188065	0.525959
10919354	Pls1	plastin 1	0.186465	5.8077	2.58707	0.0188196	0.525959
10735036	Neurl4	neuralized E3 ubiquitin protein ligase 4	-0.133474	6.73368	-2.58383	0.018947	0.527291
10872266	Rnf19b	ring finger protein 19B	-0.239309	7.22793	-2.58357	0.0189576	0.527291
10712978	Brms1	BRMS1, transcriptional repressor and anoikis regulator	-0.160897	7.51801	-2.58129	0.0190479	0.527921
10916697	Nlrx1	NLR family member X1	-0.263911	4.85349	-2.57818	0.0191718	0.527921
10900511	Reep6	receptor accessory protein 6	-0.221461	7.94581	-2.57672	0.0192302	0.527921
10813678	Amacr	alpha-methylacyl-CoA racemase	-0.157361	5.23703	-2.57514	0.0192936	0.527921
10710875	Sgf29	SAGA complex associated factor 29	-0.199865	5.83649	-2.5751	0.0192952	0.527921
10805802	Slc38a7	solute carrier family 38, member 7	-0.273767	6.49177	-2.57403	0.0193383	0.527921
10812021	Itgb1	integrin subunit beta 1	0.228524	7.19241	2.57044	0.0194834	0.527921
10781966	Slitrk5	SLIT and NTRK-like family, member 5	-0.19453	7.27842	-2.57007	0.0194985	0.527921
10723992	Plekhb1	pleckstrin homology domain containing B1	0.252155	9.70444	2.56891	0.0195456	0.527921
10788627	Nrg1	neuregulin 1	-0.164677	4.70278	-2.56569	0.019677	0.527921
10761271	Gtf2ird2	GTF2I repeat domain containing 2	-0.14184	5.80605	-2.56548	0.0196857	0.527921
10775782	Shroom3	shroom family member 3	-0.348966	4.18723	-2.56542	0.0196881	0.527921
10806106	Tom1	target of myb1 membrane trafficking protein	-0.220264	7.48997	-2.5629	0.0197916	0.527921
10726916	Tollip	toll interacting protein	-0.178836	6.68342	-2.56154	0.0198477	0.527921
10892143	Degs2	delta(4)-desaturase, sphingolipid 2	-0.211142	4.90026	-2.56113	0.0198647	0.527921
10867406	Sox17	SRY-box transcription factor 17	-0.186101	4.7394	-2.55811	0.0199899	0.527921
10715653	Sfxn3	sideroflexin 3	-0.364747	7.72915	-2.55747	0.0200165	0.527921
10719648	Zfp61	zinc finger protein 61	-0.190927	6.44666	-2.55723	0.0200264	0.527921
10830554	Cd164	CD164 molecule	0.160475	7.90933	2.55238	0.0202295	0.527921
10705588	Sirt2	sirtuin 2	0.155197	10.1179	2.55021	0.0203208	0.527921
10887746	Ptprn2	protein tyrosine phosphatase, receptor type N2	-0.211395	9.27074	-2.5502	0.0203213	0.527921
10897239	Mroh1	maestro heat-like repeat family member 1	-0.171236	5.68734	-2.54998	0.0203306	0.527921
10834022	Arrdc3	arrestin domain containing 3	0.206625	6.81379	2.54955	0.0203489	0.527921
10908277	Shfl	shiftless antiviral inhibitor of ribosomal frameshifting	-0.146319	6.74793	-2.5454	0.0205252	0.527921
10893706	Ap3d1	adaptor related protein complex 3 subunit delta 1	-0.108212	8.65077	-2.54469	0.0205555	0.527921
10724449	Fhip1b	FHF complex subunit HOOK interacting protein 1B	-0.188836	6.63276	-2.53983	0.0207637	0.527921
10724529	Tpp1	tripeptidyl peptidase 1	0.164316	8.37121	2.5389	0.0208037	0.527921
10920352	Trex1	three prime repair exonuclease 1	-0.243235	5.95727	-2.5378	0.0208513	0.527921
10865578	Gpr162	G protein-coupled receptor 162	-0.296264	7.7725	-2.5369	0.0208905	0.527921
10907324	Galnt6	polypeptide N-acetylgalactosaminyltransferase 6	0.257913	4.60279	2.53642	0.0209111	0.527921
10799017	Nid1	nidogen 1	0.412277	5.89819	2.5347	0.020986	0.527921
10706117	Pepd	peptidase D	-0.193655	7.16845	-2.53421	0.0210075	0.527921
10759089	Gltp	glycolipid transfer protein	0.193308	6.48338	2.53235	0.0210885	0.527921
10777378	Crmp1	collapsin response mediator protein 1	-0.221886	7.85221	-2.52715	0.0213173	0.527921
10919377	Atp1b3	ATPase Na+/K+ transporting subunit beta 3	0.171223	5.83316	2.52629	0.0213552	0.527921
10779093	Usp54	ubiquitin specific peptidase 54	0.299952	7.68165	2.52575	0.0213793	0.527921
10940422	Dmrtc1a	DMRT-like family C1a	-0.166486	5.39176	-2.52465	0.0214279	0.527921
10717170	Epb41l2	erythrocyte membrane protein band 4.1-like 2	0.139207	7.30791	2.52395	0.0214589	0.527921
10756040	Ufd1	ubiquitin recognition factor in ER associated degradation 1	-0.12475	7.79262	-2.52209	0.0215418	0.527921
10741268	Mapk8ip3	mitogen-activated protein kinase 8 interacting protein 3	-0.133166	8.91456	-2.5216	0.0215636	0.527921
10919422	Pxylp1	2-phosphoxylose phosphatase 1	-0.208711	4.98579	-2.52129	0.0215776	0.527921
10793096	Rhoa	ras homolog family member A	0.104963	9.30147	2.52071	0.0216036	0.527921
10745751	Mrm1	mitochondrial rRNA methyltransferase 1	-0.201211	4.36455	-2.52045	0.0216152	0.527921
10779162	Dnajc9	DnaJ heat shock protein family (Hsp40) member C9	-0.156438	4.78407	-2.51621	0.0218058	0.527921
10844251	Fnbp1	formin binding protein 1	0.206246	8.21525	2.51571	0.0218283	0.527921
10929086	Atg9a	autophagy related 9A	-0.207399	7.6453	-2.51569	0.0218293	0.527921
10827105	Pkn2	protein kinase N2	0.116886	6.52471	2.51454	0.0218812	0.527921
10727759	Pacs1	phosphofurin acidic cluster sorting protein 1	-0.183025	7.25366	-2.51296	0.0219529	0.527921
10911296	Bnip2	BCL2 interacting protein 2	0.175472	5.96071	2.51263	0.021968	0.527921
10803474	Nol4	nucleolar protein 4	-0.42312	6.67689	-2.51203	0.0219954	0.527921
10906840	Zfp641	zinc finger protein 641	-0.189873	4.08128	-2.5116	0.0220149	0.527921
10729460	Pabir1	PP2A Aalpha (PPP2R1A) and B55A (PPP2R2A) interacting phosphatase regulator 1	-0.156637	4.98357	-2.51088	0.0220479	0.527921
10922771	Cnot11	CCR4-NOT transcription complex, subunit 11	-0.172342	6.06736	-2.50931	0.0221194	0.527921
10834462	Dipk1b	divergent protein kinase domain 1B	-0.19667	7.18702	-2.50828	0.0221668	0.527921
10801653	Hsd17b4	hydroxysteroid (17-beta) dehydrogenase 4	0.177256	7.12348	2.50559	0.0222904	0.527921
10881178	Dnajc16	DnaJ heat shock protein family (Hsp40) member C16	-0.209688	7.21053	-2.50517	0.0223097	0.527921
10861890	Creb3l2	cAMP responsive element binding protein 3-like 2	0.129389	5.46516	2.50478	0.0223277	0.527921
10852600	Rgs19	regulator of G-protein signaling 19	-0.142509	6.04726	-2.504	0.0223639	0.527921
10874193	Errfi1	ERBB receptor feedback inhibitor 1	0.25006	7.63364	2.5035	0.0223869	0.527921
10745081	Pigs	phosphatidylinositol glycan anchor biosynthesis, class S	-0.229533	6.62237	-2.50277	0.0224208	0.527921
10867979	Map3k7	mitogen activated protein kinase kinase kinase 7	-0.131147	6.87362	-2.50028	0.0225365	0.527921
10794084	Rab24	RAB24, member RAS oncogene family	-0.126658	6.45197	-2.49886	0.0226025	0.527921
10793103	Gpx1	glutathione peroxidase 1	0.167037	6.39824	2.49769	0.0226571	0.527921
10887359	Trmt61a	tRNA methyltransferase 61A	-0.317059	5.11686	-2.4974	0.0226706	0.527921
10716657	Tab2	TGF-beta activated kinase 1/MAP3K7 binding protein 2	0.103029	6.81433	2.49634	0.0227206	0.527921
10932953	Fgd1	FYVE, RhoGEF and PH domain containing 1	-0.197112	5.17163	-2.49607	0.0227331	0.527921
10710985	Cdipt	CDP-diacylglycerol--inositol 3-phosphatidyltransferase	-0.17338	8.74685	-2.49581	0.0227455	0.527921
10725279	Gprc5b	G protein-coupled receptor, class C, group 5, member B	0.151154	8.66996	2.49427	0.0228177	0.527921
10790712	Tpm4	tropomyosin 4	0.178281	7.61782	2.49424	0.0228191	0.527921
10792863	Atp11a	ATPase phospholipid transporting 11A	0.191939	6.5804	2.49386	0.022837	0.527921
10720415	Fam98c	family with sequence similarity 98, member C	-0.208568	6.097	-2.49219	0.0229159	0.527921
10861452	Impdh1	inosine monophosphate dehydrogenase 1	-0.261463	5.89366	-2.49112	0.0229665	0.527921
10928952	Rnf25	ring finger protein 25	-0.129064	6.23696	-2.49107	0.0229692	0.527921
10791640	Irf2	interferon regulatory factor 2	0.124204	6.28189	2.49058	0.0229921	0.527921
10894465	Syn3	synapsin III	-0.20636	7.48715	-2.49025	0.023008	0.527921
10770224	Hnrnpu	heterogeneous nuclear ribonucleoprotein U	0.111948	8.99747	2.48879	0.0230772	0.527921
10720918	Gramd1a	GRAM domain containing 1A	-0.148125	7.32096	-2.48825	0.0231031	0.527921
10769621	Uck2	uridine-cytidine kinase 2	-0.319693	7.09555	-2.4874	0.0231435	0.527921
10890891	Dcaf5	DDB1 and CUL4 associated factor 5	-0.197934	7.285	-2.48689	0.0231682	0.527921
10728046	Dpf2	double PHD fingers 2	-0.159405	7.30089	-2.4866	0.0231821	0.527921
10847296	Slc39a13	solute carrier family 39 member 13	-0.169063	6.07908	-2.48634	0.0231942	0.527921
10846817	Selenoh	selenoprotein H	-0.231839	5.19577	-2.48574	0.0232233	0.527921
10728700	Lrrc10b	leucine rich repeat containing 10B	0.640191	4.29093	2.48552	0.0232339	0.527921
10887622	Crip1	cysteine rich protein 1	0.260329	4.26278	2.48534	0.0232422	0.527921
10796440	Pter	phosphotriesterase related	0.352171	5.19626	2.48469	0.0232734	0.527921
10917924	Neo1	neogenin 1	0.135891	8.15191	2.48466	0.0232748	0.527921
10749933	Rbm11	RNA binding motif protein 11	-0.259033	6.06219	-2.48397	0.0233079	0.527921
10810839	Cog8	component of oligomeric golgi complex 8	-0.182469	6.13484	-2.48343	0.0233342	0.527921
10806650	Rad23a	RAD23 homolog A, nucleotide excision repair protein	-0.184294	7.38395	-2.48287	0.0233608	0.527921
10704941	Smg9	SMG9 nonsense mediated mRNA decay factor	-0.207085	5.49449	-2.48215	0.0233956	0.527921
10726824	Slc25a22	solute carrier family 25 member 22	-0.297954	8.67686	-2.48198	0.023404	0.527921
10910726	Aagab	alpha- and gamma-adaptin binding protein	-0.265851	6.68521	-2.47945	0.0235263	0.527921
10924446	Retreg2	reticulophagy regulator family member 2	-0.262815	8.65649	-2.47922	0.0235377	0.527921
10929177	Chpf	chondroitin polymerizing factor	-0.197189	6.9919	-2.47902	0.023547	0.527921
10802621	Mbd1	methyl-CpG binding domain protein 1	-0.138999	6.33924	-2.47836	0.023579	0.527921
10743427	Mapk7	mitogen-activated protein kinase 7	-0.184291	5.53679	-2.47681	0.0236547	0.527921
10869474	Mir455	microRNA 455	-0.138631	4.42539	-2.47668	0.023661	0.527921
10741841	Atp6v0e1	ATPase H+ transporting V0 subunit e1	0.175002	6.9118	2.47604	0.0236923	0.527921
10815442	Spart	spartin	0.128903	6.01976	2.47581	0.0237033	0.527921
10817868	Igsf3	immunoglobulin superfamily, member 3	-0.193475	5.36655	-2.47493	0.0237466	0.527921
10762857	Usp30	ubiquitin specific peptidase 30	-0.195921	6.07315	-2.47439	0.0237731	0.527921
10842753	Ss18l1	SS18L1 subunit of BAF chromatin remodeling complex	-0.18578	7.0409	-2.47402	0.0237908	0.527921
10736736	Lig3	DNA ligase 3	0.119475	6.09829	2.47359	0.0238121	0.527921
10738530	G6pc3	glucose 6 phosphatase catalytic subunit 3	-0.175186	7.72113	-2.4722	0.0238806	0.527921
10905141	Zfp251	zinc finger protein 251	-0.18752	5.34581	-2.47199	0.0238909	0.527921
10823508	Ccnl1	cyclin L1	0.173785	6.23215	2.47081	0.023949	0.527921
10791166	Atp13a1	ATPase 13A1	-0.142056	5.73069	-2.47056	0.0239612	0.527921
10814528	Tnfsf10	TNF superfamily member 10	-0.227787	4.07267	-2.46928	0.0240245	0.527921
10725955	Cd2bp2	Cd2 (cytoplasmic tail) binding protein 2	-0.143722	6.28468	-2.46735	0.0241199	0.527921
10900537	Dazap1	DAZ associated protein 1	0.174037	6.63401	2.46639	0.024168	0.527921
10720097	Pld3	phospholipase D family, member 3	-0.252056	9.94561	-2.46621	0.0241766	0.527921
10775862	Parm1	prostate androgen-regulated mucin-like protein 1	-0.25708	7.8649	-2.46563	0.0242057	0.527921
10774701	Ccdc88a	coiled coil domain containing 88A	0.10719	8.24732	2.46455	0.0242595	0.527921
10707837	Lins1	lines homolog 1	-0.120537	4.09702	-2.46412	0.0242807	0.527921
10757962	Asl	argininosuccinate lyase	-0.10099	4.69327	-2.46371	0.0243016	0.527921
10845743	Fign	fidgetin, microtubule severing factor	0.231861	4.15721	2.46273	0.0243504	0.527921
10776320	Rest	RE1-silencing transcription factor	0.128751	4.35776	2.45961	0.0245071	0.527921
10725427	Cog7	component of oligomeric golgi complex 7	-0.160436	5.09561	-2.45928	0.0245241	0.527921
10773663	Eif4enif1	eukaryotic translation initiation factor 4E nuclear import factor 1	-0.158842	7.14418	-2.45907	0.0245343	0.527921
10929128	Ptprn	protein tyrosine phosphatase, receptor type, N	-0.160433	9.52128	-2.45893	0.0245415	0.527921
10745533	Asic2	acid sensing ion channel subunit 2	-0.304842	7.22055	-2.45813	0.0245822	0.527921
10725659	Spns1	sphingolipid transporter 1	-0.252333	6.12582	-2.45769	0.0246041	0.527921
10908308	Mrpl4	mitochondrial ribosomal protein L4	-0.289404	7.68252	-2.45677	0.0246509	0.527921
10882367	Cntfr	ciliary neurotrophic factor receptor	-0.201934	9.03593	-2.45522	0.0247297	0.527921
10832253	Cfap410	cilia and flagella associated protein 410	-0.128083	5.64596	-2.45509	0.0247362	0.527921
10871750	Pabpc4	poly(A) binding protein, cytoplasmic 4	-0.135597	7.13374	-2.45489	0.0247463	0.527921
10762085	Atxn2	ataxin 2	-0.180496	8.89774	-2.45365	0.0248091	0.527921
10715721	Nolc1	nucleolar and coiled-body phosphoprotein 1	-0.124444	6.86296	-2.45101	0.0249443	0.527921
10761152	Mdh2	malate dehydrogenase 2	-0.127951	9.87032	-2.45061	0.0249648	0.527921
10705553	Fbxo27	F-box protein 27	-0.197829	4.50887	-2.44917	0.0250389	0.527921
10727520	Ankrd13d	ankyrin repeat domain 13D	-0.18229	6.84549	-2.44909	0.0250429	0.527921
10888404	Rasgrp3	RAS guanyl releasing protein 3	0.198061	6.94506	2.44753	0.0251235	0.527921
10762762	Ankrd13a	ankyrin repeat domain 13a	0.154516	7.28386	2.44466	0.0252716	0.527921
10750505	Pcp4	Purkinje cell protein 4	0.281809	10.673	2.44346	0.0253339	0.527921
10915734	Elof1	elongation factor 1 homolog	-0.203665	5.85585	-2.44298	0.0253589	0.527921
10810662	Acd	ACD, shelterin complex subunit and telomerase recruitment factor	-0.206083	7.10267	-2.4422	0.0253999	0.527921
10714505	Kank1	KN motif and ankyrin repeat domains 1	0.248696	5.39347	2.43905	0.0255646	0.527921
10791085	Nr2c2ap	nuclear receptor 2C2-associated protein	-0.214819	6.98094	-2.43857	0.0255895	0.527921
10796943	Cdk20	cyclin-dependent kinase 20	-0.133742	6.21672	-2.4369	0.0256771	0.527921
10762258	Rasal1	RAS protein activator like 1	-0.368143	6.50864	-2.43635	0.0257061	0.527921
10731380	Mpv17l	MPV17 mitochondrial inner membrane protein like	-0.176513	6.32865	-2.43595	0.0257273	0.527921
10746923	Med24	mediator complex subunit 24	-0.15409	7.0802	-2.43506	0.0257741	0.527921
10915555	S1pr5	sphingosine-1-phosphate receptor 5	0.29697	6.41847	2.43362	0.0258507	0.527921
10706297	Siglec5	sialic acid binding Ig-like lectin 5	-0.167025	4.88319	-2.43283	0.0258927	0.527921
10844968	Lrp1b	LDL receptor related protein 1B	-0.291199	5.59917	-2.43246	0.0259124	0.527921
10722720	Arrdc4	arrestin domain containing 4	0.183199	4.3828	2.43207	0.025933	0.527921
10926070	Yes1	YES proto-oncogene 1, Src family tyrosine kinase	0.239655	5.84467	2.43194	0.0259396	0.527921
10844119	Zer1	zyg-11 related, cell cycle regulator	-0.140786	7.0553	-2.43148	0.0259643	0.527921
10749005	Grb2	growth factor receptor bound protein 2	-0.130388	8.42909	-2.43146	0.0259655	0.527921
10794328	Fgd3	FYVE, RhoGEF and PH domain containing 3	-0.192921	4.25246	-2.43016	0.0260344	0.527921
10745558	Rffl	ring finger and FYVE-like domain containing E3 ubiquitin protein ligase	0.201376	5.79619	2.42962	0.0260634	0.527921
10936055	Fam3a	FAM3 metabolism regulating signaling molecule A	0.136695	5.6501	2.4252	0.0263003	0.527921
10890886	Zfp36l1	zinc finger protein 36, C3H type-like 1	0.177188	7.02858	2.42494	0.0263144	0.527921
10817563	Lix1l	limb and CNS expressed 1 like	0.140852	6.2875	2.42457	0.0263344	0.527921
10910953	Pdcd7	programmed cell death 7	-0.128802	6.87413	-2.42277	0.0264317	0.527921
10732592	Nprl3	NPR3-like, GATOR1 complex subunit	-0.153641	6.02288	-2.42271	0.026435	0.527921
10731514	Dexi	Dexi homolog	-0.204522	7.56523	-2.42238	0.0264528	0.527921
10872747	Ubxn11	UBX domain protein 11	-0.15171	4.97303	-2.42185	0.0264812	0.527921
10858408	A2m	alpha-2-macroglobulin	0.206995	4.37937	2.42101	0.026527	0.527921
10890592	Trmt5	tRNA methyltransferase 5	-0.149663	4.21337	-2.42084	0.0265361	0.527921
10936520	Elk1	ETS transcription factor ELK1	-0.172688	6.87307	-2.42065	0.0265466	0.527921
10916156	Pknox2	PBX/knotted 1 homeobox 2	-0.303452	7.21012	-2.41867	0.0266545	0.527921
10873768	Casp9	caspase 9	-0.211445	6.3595	-2.41786	0.0266985	0.527921
10785116	Dmtn	dematin actin binding protein	-0.280264	9.24352	-2.41514	0.0268474	0.527921
10900296	Dapk3	death-associated protein kinase 3	-0.21167	7.52638	-2.41466	0.0268737	0.527921
10754114	Mir568	microRNA 568	0.292175	4.36264	2.41367	0.0269281	0.527921
10893528	Fzr1	fizzy and cell division cycle 20 related 1	-0.192792	6.69202	-2.41353	0.0269357	0.527921
10901940	Vezt	vezatin, adherens junctions transmembrane protein	-0.112563	6.72355	-2.41281	0.0269756	0.527921
10758744	Ptpn11	protein tyrosine phosphatase, non-receptor type 11	0.167838	6.22889	2.41145	0.0270509	0.527921
10940675	Afg1l	AFG1 like ATPase	-0.174619	5.08643	-2.41015	0.027123	0.527921
10713084	Rnaseh2c	ribonuclease H2, subunit C	-0.232409	4.97492	-2.40861	0.0272085	0.527921
10715704	Hps6	HPS6, biogenesis of lysosomal organelles complex 2 subunit 3	-0.138749	4.00955	-2.40782	0.0272523	0.527921
10720734	Rbm42	RNA binding motif protein 42	-0.139692	5.40884	-2.40708	0.0272936	0.527921
10703983	Hspbp1	HSPA (Hsp70) binding protein 1	-0.237135	6.70743	-2.40684	0.0273071	0.527921
10905239	Foxred2	FAD-dependent oxidoreductase domain containing 2	-0.199556	5.05818	-2.40447	0.0274391	0.527921
10874952	Kcnb2	potassium voltage-gated channel subfamily B member 2	-0.37974	6.27257	-2.40366	0.0274845	0.527921
10842254	Slc12a5	solute carrier family 12 member 5	-0.178104	8.79033	-2.40327	0.0275064	0.527921
10868416	Phf24	PHD finger protein 24	-0.335844	9.20444	-2.40261	0.0275435	0.527921
10702535	Nkd2	NKD inhibitor of WNT signaling pathway 2	-0.273749	5.24929	-2.40248	0.0275511	0.527921
10844167	Sh3glb2	SH3 domain-containing GRB2-like endophilin B2	-0.282214	7.60579	-2.4014	0.027612	0.527921
10769430	Gorab	golgin, RAB6-interacting	-0.150284	4.782	-2.4013	0.0276178	0.527921
10744576	Dhx33	DEAH-box helicase 33	-0.192946	6.17512	-2.40094	0.027638	0.527921
10756899	Gna12	G protein subunit alpha 12	0.170063	8.7497	2.39914	0.0277398	0.527921
10765534	Adamts4	ADAM metallopeptidase with thrombospondin type 1 motif, 4	0.300814	6.31171	2.39886	0.0277555	0.527921
10741248	Nubp2	nucleotide binding protein 2	-0.169505	6.90825	-2.3986	0.02777	0.527921
10820824	Ptcd2	pentatricopeptide repeat domain 2	-0.284864	4.76135	-2.39813	0.027797	0.527921
10800038	F8	coagulation factor VIII	-0.152923	4.05321	-2.39759	0.0278277	0.527921
10712174	B4galnt4	beta-1,4-N-acetyl-galactosaminyl transferase 4	-0.267378	6.83149	-2.39753	0.027831	0.527921
10755285	Chrd	chordin	-0.306005	4.92339	-2.39661	0.0278832	0.527921
10869661	Prrc2c	proline-rich coiled-coil 2C	0.143668	8.99325	2.39562	0.0279395	0.527921
10721883	Sphk2	sphingosine kinase 2	-0.181431	5.65853	-2.39561	0.0279399	0.527921
10738209	Cnp	2',3'-cyclic nucleotide 3' phosphodiesterase	0.260536	8.89993	2.39503	0.0279733	0.527921
10715697	Dpcd	deleted in primary ciliary dyskinesia	-0.169625	7.60126	-2.39372	0.028048	0.527921
10743137	Snap47	synaptosome associated protein 47	-0.203722	6.14643	-2.39111	0.0281974	0.527921
10712276	Eps8l2	EPS8-like 2	-0.262662	4.54421	-2.3908	0.0282157	0.527921
10940603	Ldaf1	lipid droplet assembly factor 1	0.255317	5.74705	2.3902	0.0282499	0.527921
10898160	Mcat	malonyl-CoA-acyl carrier protein transacylase	-0.138402	5.55588	-2.38993	0.0282658	0.527921
10726574	Tubgcp2	tubulin, gamma complex associated protein 2	-0.156514	6.8133	-2.38981	0.0282722	0.527921
10816607	Rit1	Ras-like without CAAX 1	-0.140533	7.39695	-2.38938	0.0282971	0.527921
10808138	Mon1b	MON1 homolog B, secretory trafficking associated	-0.16532	6.1988	-2.38934	0.0282998	0.527921
10806628	Gcdh	glutaryl-CoA dehydrogenase	-0.17783	6.42303	-2.38697	0.0284368	0.527921
10756011	Hira	histone cell cycle regulator	-0.139311	6.35493	-2.3861	0.0284873	0.527921
10715190	LOC685933	hypothetical protein LOC685933	0.153066	5.78001	2.386	0.0284931	0.527921
10772342	Fryl	FRY like transcription coactivator	0.135701	6.56169	2.38326	0.0286526	0.527921
10908562	Plppr2	phospholipid phosphatase related 2	-0.233584	9.74819	-2.38305	0.0286645	0.527921
10886269	Flrt2	fibronectin leucine rich transmembrane protein 2	-0.182829	6.97128	-2.38272	0.028684	0.527921
10839327	Sema6d	semaphorin 6D	0.245258	7.58094	2.38056	0.0288101	0.527921
10776459	Pdgfra	platelet derived growth factor receptor alpha	0.207376	7.37474	2.37935	0.0288815	0.527921
10900721	Arid3a	AT-rich interaction domain 3A	-0.163322	4.35682	-2.3785	0.0289311	0.527921
10914935	Endod1	endonuclease domain containing 1	0.23173	7.88581	2.37812	0.0289538	0.527921
10740919	Elob	elongin B	-0.134197	7.12177	-2.37756	0.0289869	0.527921
10895600	Mdm1	Mdm1 nuclear protein	0.125242	4.29036	2.37741	0.0289956	0.527921
10934782	Pcdh11x	protocadherin 11 X-linked	-0.19614	4.66521	-2.37613	0.0290711	0.527921
10782323	Sec24c	SEC24 homolog C, COPII coat complex component	-0.10278	7.53526	-2.37593	0.0290833	0.527921
10757001	LOC102546414	uncharacterized LOC102546414	-0.126091	5.73869	-2.37551	0.0291079	0.527921
10871644	Slfnl1	schlafen-like 1	0.180371	4.2131	2.37484	0.0291477	0.527921
10824904	Zfp687	zinc finger protein 687	-0.160529	5.65762	-2.37434	0.0291772	0.527921
10791346	Spock3	SPARC/osteonectin, cwcv and kazal like domains proteoglycan 3	0.584004	7.79076	2.37407	0.0291936	0.527921
10746221	Tom1l1	target of myb1 like 1 membrane trafficking protein	-0.255485	5.57657	-2.3739	0.0292033	0.527921
10827916	Ddr1	discoidin domain receptor tyrosine kinase 1	0.253872	6.34093	2.37386	0.029206	0.527921
10799684	Itga8	integrin subunit alpha 8	0.242621	4.29244	2.37317	0.0292471	0.527921
10915648	Rab3d	RAB3D, member RAS oncogene family	-0.160792	5.63019	-2.37126	0.0293605	0.527921
10770810	Camk1g	calcium/calmodulin-dependent protein kinase IG	-0.268213	7.098	-2.3712	0.0293644	0.527921
10866672	Recql	RecQ like helicase	-0.150789	4.80829	-2.3711	0.0293704	0.527921
10875616	Necab1	N-terminal EF-hand calcium binding protein 1	-0.308778	9.71414	-2.37058	0.0294012	0.527921
10759488	Zfp958	zinc finger protein 958	0.150369	6.73721	2.37034	0.0294158	0.527921
10809092	Setd6	SET domain containing 6, protein lysine methyltransferase	-0.157641	4.37038	-2.3692	0.0294837	0.527921
10758863	Fbxw8	F-box and WD repeat domain containing 8	-0.134583	6.43827	-2.36886	0.0295041	0.527921
10728800	Tmem132a	transmembrane protein 132A	-0.288253	7.88439	-2.36717	0.029606	0.527921
10897741	Tab1	TGF-beta activated kinase 1/MAP3K7 binding protein 1	-0.149166	5.57145	-2.3652	0.0297246	0.527921
10723792	Capn5	calpain 5	-0.298868	6.52407	-2.36487	0.0297447	0.527921
10761341	Rabgef1	RAB guanine nucleotide exchange factor 1	-0.118763	6.67136	-2.36257	0.0298837	0.527921
10841637	Nnat	neuronatin	0.75951	8.43077	2.36221	0.0299058	0.527921
10712211	Ptdss2	phosphatidylserine synthase 2	-0.111152	7.69299	-2.36003	0.0300382	0.527921
10809967	Tnpo2	transportin 2	-0.160317	7.7323	-2.35969	0.0300588	0.527921
10713844	Fads3	fatty acid desaturase 3	-0.270651	5.93535	-2.35787	0.03017	0.527921
10787765	Psd3	pleckstrin and Sec7 domain containing 3	-0.100444	9.07904	-2.35749	0.0301936	0.527921
10782454	Thrb	thyroid hormone receptor beta	-0.292822	7.58943	-2.35677	0.0302379	0.527921
10835498	Plpp7	phospholipid phosphatase 7 (inactive)	-0.19287	4.88478	-2.35675	0.0302389	0.527921
10924485	Stk16	serine/threonine kinase 16	-0.116182	7.05012	-2.35533	0.0303265	0.527921
10817894	Ngf	nerve growth factor	-0.158371	4.71558	-2.35454	0.0303751	0.527921
10844273	NEWGENE_735020	pyroglutamylated RFamide peptide	-0.160669	4.81422	-2.35405	0.0304053	0.527921
10856888	Alms1	ALMS1, centrosome and basal body associated protein	0.145463	5.74921	2.35386	0.0304168	0.527921
10897169	Exosc4	exosome component 4	-0.171605	4.69376	-2.35385	0.0304173	0.527921
10788766	Fnta	farnesyltransferase, CAAX box, alpha	0.150611	7.60961	2.35158	0.0305577	0.527921
10768332	Rgs2	regulator of G-protein signaling 2	0.225954	7.6082	2.35092	0.0305984	0.527921
10856703	Mob1a	MOB kinase activator 1A	0.205222	5.42904	2.3506	0.0306184	0.527921
10777878	Sfi1	SFI1 centrin binding protein	-0.175602	5.03239	-2.35058	0.0306196	0.527921
10872059	RGD1563072	similar to hypothetical protein FLJ38984	-0.210289	6.37582	-2.34969	0.0306751	0.527921
10897604	Micall1	MICAL-like 1	0.159209	4.84661	2.34961	0.0306802	0.527921
10790954	Lsm4	LSM4 homolog, U6 small nuclear RNA and mRNA degradation associated	-0.131703	7.60828	-2.34851	0.0307484	0.527921
10940648	Hk1	hexokinase 1	-0.13892	9.09668	-2.34801	0.0307796	0.527921
10862599	Jazf1	JAZF zinc finger 1	-0.164135	6.7217	-2.34774	0.0307968	0.527921
10738038	Psmd3	proteasome 26S subunit, non-ATPase 3	-0.128899	7.3774	-2.34761	0.0308048	0.527921
10864185	Adamts9	ADAM metallopeptidase with thrombospondin type 1 motif, 9	0.145894	4.3474	2.3476	0.0308051	0.527921
10724524	Taf10	TATA-box binding protein associated factor 10	-0.14891	7.62214	-2.34669	0.0308624	0.527921
10736687	Spaca3	sperm acrosome associated 3	-0.136903	4.39318	-2.34615	0.0308961	0.527921
10743409	Rnf112	ring finger protein 112	-0.223206	6.98681	-2.34588	0.0309127	0.527921
10863960	Plxna1	plexin A1	-0.337168	7.0048	-2.34576	0.0309207	0.527921
10850918	Snta1	syntrophin, alpha 1	-0.187246	5.2764	-2.34573	0.0309222	0.527921
10746783	Rpl23	ribosomal protein L23	0.108248	8.22223	2.34515	0.0309584	0.527921
10736852	Taf15	TATA-box binding protein associated factor 15	0.138032	8.49925	2.34424	0.0310156	0.527921
10761186	Nsun5	NOP2/Sun RNA methyltransferase 5	-0.178042	5.59257	-2.34393	0.0310356	0.527921
10894395	Cd320	CD320 molecule	-0.179392	6.48983	-2.34358	0.0310576	0.527921
10797218	B4galt7	beta-1,4-galactosyltransferase 7	-0.173401	4.93007	-2.34312	0.031086	0.527921
10717233	Ccn2	cellular communication network factor 2	0.228298	4.59031	2.34219	0.0311449	0.527921
10790752	Nr2f6	nuclear receptor subfamily 2, group F, member 6	-0.194814	4.16153	-2.34061	0.0312444	0.527921
10853020	Reln	reelin	-0.290749	7.0824	-2.34027	0.0312663	0.527921
10847308	Madd	MAP-kinase activating death domain	-0.154836	7.66428	-2.3402	0.0312707	0.527921
10813752	Mtmr12	myotubularin related protein 12	-0.273488	6.0059	-2.33969	0.0313033	0.527921
10797232	Prr7	proline rich 7 (synaptic)	-0.187433	6.9394	-2.33923	0.0313318	0.527921
10734830	Ctc1	CST telomere replication complex component 1	-0.155855	7.27055	-2.33875	0.0313625	0.527921
10900218	Cactin	cactin, spliceosome C complex subunit	-0.142335	4.39967	-2.33574	0.0315541	0.529956
10899354	Acvrl1	activin A receptor like type 1	-0.255287	4.93058	-2.33479	0.0316147	0.529956
10925600	Septin2	septin 2	0.184848	8.11282	2.33472	0.0316195	0.529956
10749656	Mcrip1	MAPK regulated co-repressor interacting protein 1	-0.220112	6.87137	-2.32945	0.031958	0.531554
10742402	Ltc4s	leukotriene C4 synthase	-0.321568	4.25884	-2.32857	0.0320151	0.531554
10917740	Commd4	COMM domain containing 4	-0.199303	6.57643	-2.32838	0.0320273	0.531554
10891795	Trip11	thyroid hormone receptor interactor 11	0.113725	6.86866	2.32832	0.0320311	0.531554
10906323	Chkb	choline kinase beta	-0.129347	5.86376	-2.32816	0.0320419	0.531554
10704895	Zfp180	zinc finger protein 180	-0.178684	7.67519	-2.32746	0.0320869	0.531554
10940662	Capn10	calpain 10	-0.117786	5.05869	-2.32719	0.0321048	0.531554
10778179	Kremen1	kringle containing transmembrane protein 1	0.549937	5.30669	2.32629	0.0321627	0.531554
10806937	Smarca5	SWI/SNF related, matrix associated, actin dependent regulator of chromatin, subfamily a, member 5	0.125419	7.42546	2.32616	0.0321714	0.531554
10897327	Kifc2	kinesin family member C2	-0.328832	8.04501	-2.32454	0.0322772	0.531554
10841484	Romo1	reactive oxygen species modulator 1	-0.15685	6.68959	-2.32444	0.0322833	0.531554
10836923	Map3k20	mitogen-activated protein kinase kinase kinase 20	0.138697	5.66217	2.32003	0.0325726	0.531554
10785531	Klhl1	kelch-like family member 1	-0.312208	4.06232	-2.31931	0.0326195	0.531554
10707935	Rgma	repulsive guidance molecule BMP co-receptor a	0.254907	7.39983	2.31776	0.0327219	0.531554
10727178	Cttn	cortactin	-0.120871	6.46308	-2.31769	0.0327268	0.531554
10754785	Tfrc	transferrin receptor	-0.245718	6.72214	-2.31768	0.0327271	0.531554
10741765	Hba-a3	hemoglobin alpha, adult chain 3	0.527491	6.78649	2.31738	0.0327471	0.531554
10804603	Tcof1	treacle ribosome biogenesis factor 1	-0.201475	5.01739	-2.31057	0.0332002	0.531554
10805996	Pllp	plasmolipin	0.191942	6.47234	2.30731	0.033419	0.531554
10884964	Dmac2l	distal membrane arm assembly component 2 like	-0.211725	5.08171	-2.30659	0.0334678	0.531554
10875954	Mob3b	MOB kinase activator 3B	0.241423	5.83227	2.30579	0.0335212	0.531554
10735319	Rnf167	ring finger protein 167	-0.123146	7.1073	-2.30571	0.0335266	0.531554
10922454	Arhgef4	Rho guanine nucleotide exchange factor 4	-0.126347	5.75487	-2.30541	0.0335473	0.531554
10845384	Nr4a2	nuclear receptor subfamily 4, group A, member 2	0.668429	8.44496	2.30459	0.0336028	0.531554
10731711	Anks3	ankyrin repeat and sterile alpha motif domain containing 3	-0.124397	5.08003	-2.30203	0.033776	0.531554
10711928	Dpysl4	dihydropyrimidinase-like 4	-0.194538	6.14382	-2.30164	0.033803	0.531554
10706644	Akt1s1	AKT1 substrate 1	-0.206225	5.32153	-2.3015	0.0338124	0.531554
10893974	R3hdm4	R3H domain containing 4	-0.253221	8.01725	-2.30022	0.0338998	0.531554
10923835	Nrp2	neuropilin 2	0.582326	6.44003	2.29911	0.0339755	0.531554
10855377	Gimap8	GTPase, IMAP family member 8	-0.209239	4.85423	-2.29816	0.0340406	0.531554
10781568	Nufip1	nuclear FMR1 interacting protein 1	-0.17026	5.52758	-2.29739	0.0340934	0.531554
10752919	Grik1	glutamate ionotropic receptor kainate type subunit 1	-0.110169	4.57528	-2.29709	0.0341137	0.531554
10734320	Trpv2	transient receptor potential cation channel, subfamily V, member 2	-0.265887	5.55832	-2.29646	0.034157	0.531554
10893983	Med16	mediator complex subunit 16	-0.160524	6.76672	-2.29634	0.0341657	0.531554
10744391	Rnasek	ribonuclease K	-0.132488	10.6758	-2.29574	0.0342069	0.531554
10836755	Gorasp2	golgi reassembly stacking protein 2	-0.16021	9.23306	-2.29481	0.0342706	0.531554
10704206	Zfp606	zinc finger protein 606	0.134268	4.76027	2.29443	0.0342972	0.531554
10834241	Abca2	ATP binding cassette subfamily A member 2	0.144284	8.51746	2.29439	0.0343001	0.531554
10898879	Tmem117	transmembrane protein 117	0.153805	5.98534	2.29364	0.0343513	0.531554
10713648	Tmem223	transmembrane protein 223	-0.189728	6.34349	-2.29276	0.0344124	0.531554
10801024	Ankhd1	ankyrin repeat and KH domain containing 1	0.118764	6.89988	2.29247	0.0344324	0.531554
10899741	Zc3h10	zinc finger CCCH type containing 10	-0.229017	4.59129	-2.29089	0.0345423	0.531554
10804541	Marchf3	membrane associated ring-CH-type finger 3	0.148504	4.21297	2.28674	0.0348316	0.531554
10794812	Slc22a23	solute carrier family 22, member 23	0.0993309	7.75001	2.28665	0.0348374	0.531554
10836404	Tank	TRAF family member-associated NFKB activator	0.150891	6.54253	2.28608	0.0348774	0.531554
10815026	Fgf2	fibroblast growth factor 2	0.14337	6.16364	2.28445	0.0349923	0.531554
10718217	Thbs2	thrombospondin 2	0.273018	4.17003	2.28364	0.0350493	0.531554
10795548	Kif5b	kinesin family member 5B	0.168968	9.10223	2.28354	0.0350561	0.531554
10863221	Mat2a	methionine adenosyltransferase 2A	0.192153	8.60416	2.28304	0.0350915	0.531554
10780261	Cmtm5	CKLF-like MARVEL transmembrane domain containing 5	0.188166	9.0924	2.28295	0.0350977	0.531554
10857002	Aak1	AP2 associated kinase 1	-0.229747	9.89345	-2.28089	0.0352434	0.531554
10873671	Fbxo42	F-box protein 42	-0.0935672	7.25651	-2.28028	0.035286	0.531554
10809044	Bean1	brain expressed, associated with NEDD4, 1	-0.321532	5.85148	-2.27888	0.0353858	0.531554
10760877	Trappc14	trafficking protein particle complex subunit 14	-0.247366	7.21839	-2.27827	0.0354292	0.531554
10889027	Slc35f6	solute carrier family 35, member F6	-0.158477	6.7402	-2.27815	0.0354378	0.531554
10899938	Tmem198b	transmembrane protein 198b	-0.146906	5.26048	-2.27702	0.0355177	0.531554
10887842	Strn	striatin	0.337846	7.91717	2.27609	0.0355841	0.531554
10848176	Ryr3	ryanodine receptor 3	0.532486	4.78952	2.27589	0.0355986	0.531554
10895797	Cdk4	cyclin-dependent kinase 4	0.20678	8.08541	2.27481	0.0356756	0.531554
10915000	Ankrd49	ankyrin repeat domain 49	-0.218065	6.60817	-2.27444	0.035702	0.531554
10940562	H1f4	H1.4 linker histone, cluster member	-0.172839	8.13302	-2.27393	0.0357386	0.531554
10939310	Gla	galactosidase, alpha	-0.204844	5.8797	-2.27314	0.0357951	0.531554
10809251	Coq9	coenzyme Q9	-0.175402	5.87994	-2.27292	0.035811	0.531554
10873606	Atp13a2	ATPase cation transporting 13A2	-0.140291	7.0994	-2.27285	0.0358162	0.531554
10851753	Elmo2	engulfment and cell motility 2	-0.142176	7.89828	-2.27243	0.0358464	0.531554
10939764	Gpc3	glypican 3	0.504226	4.33047	2.2724	0.0358489	0.531554
10927692	Fhl2	four and a half LIM domains 2	-0.339875	5.86831	-2.27116	0.0359382	0.531554
10876502	Zbtb5	zinc finger and BTB domain containing 5	-0.116381	4.32121	-2.27046	0.0359883	0.531554
10795616	Crem	cAMP responsive element modulator	0.154247	5.0318	2.26993	0.0360266	0.531554
10857969	Syn2	synapsin II	-0.243604	10.4074	-2.26971	0.0360423	0.531554
10749704	Sirt7	sirtuin 7	-0.216979	4.96361	-2.2695	0.0360579	0.531554
10900651	Abca7	ATP binding cassette subfamily A member 7	-0.231523	4.97445	-2.26948	0.036059	0.531554
10906119	Hdac10	histone deacetylase 10	-0.153199	5.07805	-2.26901	0.0360934	0.531554
10818021	Ap4b1	adaptor related protein complex 4 subunit beta 1	-0.160116	4.43841	-2.2687	0.0361153	0.531554
10887320	Eif5	eukaryotic translation initiation factor 5	0.088925	8.73884	2.26838	0.0361389	0.531554
10880901	Slc66a1	solute carrier family 66 member 1	-0.119558	4.11834	-2.26762	0.036194	0.531554
10791565	Vegfc	vascular endothelial growth factor C	-0.132003	4.12009	-2.26708	0.0362328	0.531554
10870609	Ssbp3	single stranded DNA binding protein 3	-0.20148	8.56849	-2.26702	0.0362376	0.531554
10852056	Bcas1	brain enriched myelin associated protein 1	0.296866	7.94768	2.26693	0.0362438	0.531554
10805100	LOC361346	similar to chromosome 18 open reading frame 54	0.211043	4.19846	2.26672	0.0362592	0.531554
10908414	Qtrt1	queuine tRNA-ribosyltransferase catalytic subunit 1	-0.128929	4.02739	-2.2667	0.0362606	0.531554
10913487	Shisa5	shisa family member 5	-0.123157	7.28916	-2.26529	0.0363631	0.531554
10860058	Abcb8	ATP binding cassette subfamily B member 8	-0.177881	5.81633	-2.26514	0.0363737	0.531554
10769870	Nit1	nitrilase 1	-0.193556	7.5124	-2.26483	0.0363967	0.531554
10827438	Rabggtb	Rab geranylgeranyltransferase subunit beta	-0.206539	7.17244	-2.26405	0.0364537	0.531554
10910619	Uaca	uveal autoantigen with coiled-coil domains and ankyrin repeats	0.168861	4.87003	2.26292	0.0365358	0.531554
10751868	Mb21d2	Mab-21 domain containing 2	-0.185489	6.63503	-2.26236	0.0365771	0.531554
10875363	Tox	thymocyte selection-associated high mobility group box	-0.375181	8.18672	-2.26158	0.0366346	0.531554
10767044	LOC100910714	60S ribosomal protein L36a-like	0.260638	5.96513	2.26107	0.0366714	0.531554
10803025	Fbxo15	F-box protein 15	-0.156368	4.01131	-2.26096	0.0366799	0.531554
10907268	Tfcp2	transcription factor CP2	-0.179784	5.72312	-2.26036	0.036724	0.531554
10815032	Spata5	spermatogenesis associated 5	0.167085	4.28849	2.26032	0.0367272	0.531554
10790991	Fkbp8	FKBP prolyl isomerase 8	-0.18277	9.36452	-2.25946	0.0367899	0.531554
10900279	Zfr2	zinc finger RNA binding protein 2	-0.164374	5.62112	-2.25927	0.036804	0.531554
10759999	Alox5ap	arachidonate 5-lipoxygenase activating protein	0.178979	4.87165	2.2592	0.0368093	0.531554
10854961	Ephb6	Eph receptor B6	-0.709479	7.33488	-2.25854	0.0368575	0.531554
10710669	Cacng3	calcium voltage-gated channel auxiliary subunit gamma 3	-0.302591	9.88006	-2.25768	0.0369211	0.531554
10760818	Zfp113	zinc finger protein 3	-0.135639	5.00638	-2.25738	0.0369432	0.531554
10921097	Zdhhc3	zinc finger DHHC-type palmitoyltransferase 3	-0.104362	6.84743	-2.25674	0.0369911	0.531554
10741101	Mlst8	MTOR associated protein, LST8 homolog	-0.134709	6.95078	-2.25453	0.0371547	0.531554
10754482	Adcy5	adenylate cyclase 5	0.673438	8.05489	2.25414	0.0371837	0.531554
10780373	Dcaf11	DDB1 and CUL4 associated factor 11	-0.131778	5.87492	-2.25344	0.0372362	0.531554
10780205	Mmp14	matrix metallopeptidase 14	0.215651	5.44982	2.25339	0.0372394	0.531554
10906054	Alg12	ALG12, alpha-1,6-mannosyltransferase	-0.193652	5.93492	-2.25332	0.0372446	0.531554
10704035	Syt5	synaptotagmin 5	-0.239797	8.79323	-2.25295	0.0372722	0.531554
10734242	Mfap4	microfibril associated protein 4	0.22186	5.97489	2.25265	0.0372943	0.531554
10746286	Luc7l3	LUC7-like 3 pre-mRNA splicing factor	0.16554	7.80906	2.25122	0.0374015	0.531554
10709048	C2cd3	C2 domain containing 3 centriole elongation regulator	-0.161138	5.78379	-2.25092	0.0374237	0.531554
10712020	Mtg1	mitochondrial ribosome-associated GTPase 1	-0.126172	5.62422	-2.24989	0.037501	0.531554
10785461	Pcdh8	protocadherin 8	-0.206175	5.71482	-2.24974	0.0375123	0.531554
10850732	Snph	syntaphilin	-0.18642	5.69564	-2.24801	0.0376424	0.531554
10899023	Cacnb3	calcium voltage-gated channel auxiliary subunit beta 3	-0.256658	8.49441	-2.24725	0.0376995	0.531554
10903816	Sntb1	syntrophin, beta 1	0.184799	6.89377	2.2471	0.0377109	0.531554
10760573	Amz1	archaelysin family metallopeptidase 1	-0.282546	4.14287	-2.24645	0.0377599	0.531554
10822178	Ankrd33b	ankyrin repeat domain 33B	-0.319358	6.50669	-2.24575	0.0378123	0.531554
10892222	Cdc42bpb	CDC42 binding protein kinase beta	-0.138725	7.70013	-2.24567	0.0378185	0.531554
10723240	Cpeb1	cytoplasmic polyadenylation element binding protein 1	-0.265102	4.95587	-2.24408	0.037939	0.531554
10814833	Fxr1	FMR1 autosomal homolog 1	0.155055	7.8727	2.24283	0.0380336	0.531554
10811501	Zcchc14	zinc finger CCHC-type containing 14	0.248188	5.98303	2.24255	0.0380549	0.531554
10769815	Tomm40l	translocase of outer mitochondrial membrane 40 like	-0.115995	7.36918	-2.24219	0.0380825	0.531554
10891264	Acyp1	acylphosphatase 1	0.117546	4.83282	2.24214	0.0380861	0.531554
10895830	B4galnt1	beta-1,4-N-acetyl-galactosaminyl transferase 1	-0.191889	7.08886	-2.24209	0.0380896	0.531554
10706013	U2af1l4	U2 small nuclear RNA auxiliary factor 1-like 4	-0.141348	7.05924	-2.24199	0.0380974	0.531554
10842001	Gdap1l1	ganglioside-induced differentiation-associated protein 1-like 1	-0.210642	7.11344	-2.24152	0.0381335	0.531554
10897347	Ppp1r16a	protein phosphatase 1, regulatory subunit 16A	-0.151703	5.27809	-2.23751	0.0384398	0.531554
10763933	Lrrn2	leucine rich repeat neuronal 2	-0.12049	8.59094	-2.23702	0.0384773	0.531554
10803995	Ndufa2	NADH:ubiquinone oxidoreductase subunit A2	-0.131599	5.81013	-2.23674	0.0384987	0.531554
10938804	Dmap1	DNA methyltransferase 1-associated protein 1	-0.112239	4.58124	-2.2363	0.038532	0.531554
10756815	Tnrc18	trinucleotide repeat containing 18	0.215291	6.18191	2.23555	0.0385899	0.531554
10738657	Acbd4	acyl-CoA binding domain containing 4	-0.22069	6.29762	-2.23547	0.0385958	0.531554
10880539	Man1c1	mannosidase, alpha, class 1C, member 1	-0.22715	8.05018	-2.23537	0.0386039	0.531554
10853691	C1galt1	core 1 synthase, glycoprotein-N-acetylgalactosamine 3-beta-galactosyltransferase, 1	-0.236625	6.1623	-2.23458	0.0386648	0.531554
10731458	Zc3h7a	zinc finger CCCH type containing 7 A	-0.114081	5.08896	-2.23409	0.0387022	0.531554
10732228	Hagh	hydroxyacyl glutathione hydrolase	-0.108997	6.55058	-2.23323	0.0387693	0.531554
10918415	Tln2	talin 2	-0.0894762	7.73844	-2.23275	0.0388061	0.531554
10832341	Slc19a1	solute carrier family 19 member 1	-0.10868	4.59103	-2.23218	0.03885	0.531554
10754218	Fstl1	follistatin-like 1	0.23843	6.27503	2.23156	0.0388979	0.531554
10731484	Txndc11	thioredoxin domain containing 11	-0.198044	5.3546	-2.23146	0.038906	0.531554
10859254	Cdkn1b	cyclin-dependent kinase inhibitor 1B	0.145582	6.48148	2.23079	0.0389576	0.531554
10837241	Zfp804a	zinc finger protein 804A	0.51834	6.41646	2.2303	0.0389962	0.531554
10829196	Rrp1	ribosomal RNA processing 1	-0.149983	6.66041	-2.22961	0.0390496	0.531554
10898676	Lrrk2	leucine-rich repeat kinase 2	0.26064	6.55473	2.22918	0.0390829	0.531554
10884339	Etv1	ETS variant transcription factor 1	-0.27571	8.59939	-2.22861	0.0391273	0.531554
10922745	Npas2	neuronal PAS domain protein 2	-0.192374	8.80373	-2.22809	0.0391684	0.531554
10897485	Gga1	golgi associated, gamma adaptin ear containing, ARF binding protein 1	-0.155589	7.12359	-2.22806	0.0391704	0.531554
10888565	Slc30a6	solute carrier family 30 member 6	-0.185435	6.45353	-2.22805	0.0391708	0.531554
10737866	Cisd3	CDGSH iron sulfur domain 3	-0.149562	5.26497	-2.22759	0.0392067	0.531554
10875974	Lingo2	leucine rich repeat and Ig domain containing 2	-0.273015	6.74137	-2.22726	0.0392332	0.531554
10910336	Rpp25	ribonuclease P and MRP subunit p25	-0.174414	5.1225	-2.22718	0.0392394	0.531554
10892884	Mtm1	myotubularin 1	-0.0975878	6.92889	-2.22597	0.0393334	0.531554
10808553	Acsf3	acyl-CoA synthetase family member 3	-0.134564	5.30902	-2.22577	0.0393492	0.531554
10936067	Ubl4a	ubiquitin-like 4A	-0.23658	6.82713	-2.22508	0.0394039	0.531554
10764115	Adipor1	adiponectin receptor 1	0.114771	7.02879	2.22488	0.0394189	0.531554
10825830	Strip1	striatin interacting protein 1	-0.20779	7.11206	-2.22359	0.0395207	0.531554
10910297	Man2c1	mannosidase, alpha, class 2C, member 1	-0.187686	5.65951	-2.22316	0.0395541	0.531554
10862415	Tmem176b	transmembrane protein 176B	0.200236	8.73902	2.22312	0.0395579	0.531554
10889415	Sox11	SRY-box transcription factor 11	0.408949	5.04349	2.22295	0.0395707	0.531554
10903400	Ubr5	ubiquitin protein ligase E3 component n-recognin 5	0.15458	8.02636	2.22269	0.0395914	0.531554
10923237	Myo1b	myosin Ib	-0.211751	6.70938	-2.2224	0.0396141	0.531554
10791022	Cope	COPI coat complex subunit epsilon	-0.191311	6.51239	-2.22097	0.0397273	0.531554
10753185	Cryzl1	crystallin zeta like 1	-0.137448	7.59703	-2.21894	0.0398883	0.531554
10702320	Clvs2	clavesin 2	-0.231461	6.5416	-2.21807	0.0399569	0.531554
10778677	Otx1	orthodenticle homeobox 1	-0.412056	6.08627	-2.21712	0.0400324	0.531554
10706571	Josd2	Josephin domain containing 2	0.166845	6.19253	2.21704	0.0400385	0.531554
10811747	Spata2L	spermatogenesis associated 2-like	-0.203762	7.91317	-2.21695	0.0400463	0.531554
10802405	Chmp1b	charged multivesicular body protein 1B	0.15301	6.33959	2.21692	0.0400482	0.531554
10835292	Ncs1	neuronal calcium sensor 1	-0.101046	9.21336	-2.21691	0.040049	0.531554
10797786	Gmpr	guanosine monophosphate reductase	-0.184164	7.26391	-2.21574	0.0401424	0.531554
10710886	Bola2	bolA family member 2	-0.126344	7.81499	-2.21573	0.0401437	0.531554
10871319	Mutyh	mutY DNA glycosylase	-0.224	4.87659	-2.21562	0.040152	0.531554
10898530	Ppp6r2	protein phosphatase 6, regulatory subunit 2	-0.119542	7.27671	-2.21538	0.0401717	0.531554
10794680	Eef1e1	eukaryotic translation elongation factor 1 epsilon 1	0.145171	7.0335	2.21496	0.0402045	0.531554
10791497	Hmgb2	high mobility group box 2	0.209651	4.4026	2.21464	0.0402301	0.531554
10835233	Dolpp1	dolichyldiphosphatase 1	-0.173355	4.6693	-2.21462	0.0402322	0.531554
10827906	Tubb5	tubulin, beta 5 class I	-0.126229	10.7267	-2.21347	0.0403238	0.531554
10806665	Nfix	nuclear factor I X	-0.325293	9.54813	-2.21336	0.0403327	0.531554
10736288	Poldip2	DNA polymerase delta interacting protein 2	-0.115166	7.52244	-2.21293	0.0403672	0.531554
10835213	Miga2	mitoguardin 2	-0.294877	5.99223	-2.21237	0.0404123	0.531554
10858827	Nop2	NOP2 nucleolar protein	-0.164213	7.69649	-2.2113	0.0404979	0.531554
10838451	Lpcat4	lysophosphatidylcholine acyltransferase 4	-0.236228	8.98267	-2.21031	0.0405781	0.531554
10817537	Hist2h3c2	histone cluster 2 H3 family member C2	0.342288	7.21956	2.20932	0.0406579	0.531554
10920078	Cyb561d2	cytochrome b561 family, member D2	-0.241716	6.06978	-2.20917	0.0406697	0.531554
10905773	Nfam1	NFAT activating protein with ITAM motif 1	-0.157363	5.97984	-2.20912	0.0406743	0.531554
10788777	Pomk	protein-O-mannose kinase	-0.146957	6.84268	-2.20847	0.0407267	0.531554
10867192	Ncoa2	nuclear receptor coactivator 2	-0.105162	7.56863	-2.20846	0.0407275	0.531554
10744134	Eif4a1	eukaryotic translation initiation factor 4A1	0.101072	8.35348	2.20832	0.0407387	0.531554
10923177	LOC685203	hypothetical protein LOC685203	0.213529	5.61377	2.20821	0.0407477	0.531554
10835578	Ciz1	CDKN1A interacting zinc finger protein 1	-0.195323	6.9982	-2.20724	0.0408258	0.531554
10794836	Serpinb6a	serpin family B member 6A	0.122339	5.17964	2.20684	0.0408587	0.531554
10750808	Gng5	G protein subunit gamma 5	0.166034	6.14317	2.20664	0.0408752	0.531554
10786422	Actr8	actin related protein 8	-0.0919142	6.56221	-2.20643	0.040892	0.531554
10730575	Actr1a	actin related protein 1A	-0.198443	7.29664	-2.20556	0.0409624	0.531554
10759241	Hscb	HscB mitochondrial iron-sulfur cluster co-chaperone	-0.145929	4.89945	-2.20533	0.0409811	0.531554
10717402	Hddc2	HD domain containing 2	-0.197099	6.50702	-2.20508	0.0410014	0.531554
10728261	Kcnk4	potassium two pore domain channel subfamily K member 4	-0.612495	7.59604	-2.20485	0.04102	0.531554
10891364	Alkbh1	alkB homolog 1, histone H2A dioxygenase	0.178242	4.42778	2.20422	0.0410715	0.531554
10750191	Olig1	oligodendrocyte transcription factor 1	0.243866	7.37232	2.20416	0.0410768	0.531554
10745497	RGD1310429	similar to Protein Njmu-R1	-0.149871	7.01298	-2.20415	0.0410773	0.531554
10879225	Szt2	SZT2 subunit of KICSTOR complex	-0.124363	5.3242	-2.20199	0.0412539	0.531554
10873736	Zbtb17	zinc finger and BTB domain containing 17	-0.123957	4.99669	-2.20161	0.0412848	0.531554
10773809	Sf3a1	splicing factor 3a, subunit 1	-0.116761	7.02729	-2.20123	0.0413162	0.531554
10798583	Elmo1	engulfment and cell motility 1	0.241727	7.01974	2.20118	0.0413201	0.531554
10844183	Crat	carnitine O-acetyltransferase	-0.147989	8.03452	-2.2007	0.0413591	0.531554
10809953	Fbxw9	F-box and WD repeat domain containing 9	-0.181582	4.78485	-2.2005	0.0413755	0.531554
10826680	Alpk1	alpha-kinase 1	-0.313811	4.40399	-2.1999	0.0414251	0.531554
10820393	Fam151b	family with sequence similarity 151, member B	-0.121462	5.97928	-2.19978	0.0414351	0.531554
10703104	Pacrg	parkin coregulated	0.288822	4.3737	2.1994	0.0414664	0.531554
10764839	LOC679963	similar to eukaryotic translation elongation factor 1 alpha 1	0.134266	9.16324	2.19835	0.041553	0.531554
10856961	Fam136a	family with sequence similarity 136, member A	-0.136733	5.24551	-2.19788	0.0415909	0.531554
10745897	Med13	mediator complex subunit 13	0.124915	7.96627	2.19683	0.041678	0.531554
10843634	Ubac1	UBA domain containing 1	0.0997043	5.88062	2.19593	0.0417528	0.531554
10736070	Nufip2	nuclear FMR1 interacting protein 2	0.193095	7.6095	2.19482	0.0418441	0.531554
10802427	Prelid3a	PRELI domain containing 3A	-0.212801	6.84671	-2.1945	0.0418705	0.531554
10825976	Cyb561d1	cytochrome b561 family, member D1	-0.17982	4.33492	-2.19443	0.0418766	0.531554
10879134	Ptprf	protein tyrosine phosphatase, receptor type, F	-0.161535	6.84158	-2.19407	0.0419062	0.531554
10900116	Stx8	syntaxin 8	-0.135483	7.79229	-2.19284	0.0420092	0.531554
10822786	Hnrnpa3	heterogeneous nuclear ribonucleoprotein A3	0.168653	8.90274	2.19228	0.0420555	0.531554
10940636	St6galnac6	ST6 N-acetylgalactosaminide alpha-2,6-sialyltransferase 6	-0.132803	7.27617	-2.19227	0.042056	0.531554
10874740	Dvl1	dishevelled segment polarity protein 1	-0.141436	6.0004	-2.19179	0.0420963	0.531554
10734822	Slc25a35	solute carrier family 25, member 35	-0.216172	4.70381	-2.19171	0.0421025	0.531554
10892152	Wars1	tryptophanyl-tRNA synthetase 1	-0.158299	8.96175	-2.19141	0.042128	0.531554
10741793	Snrnp25	small nuclear ribonucleoprotein U11/U12 subunit 25	-0.200205	4.83807	-2.19101	0.042161	0.531554
10872291	Yars1	tyrosyl-tRNA synthetase 1	-0.165923	7.20296	-2.19039	0.0422131	0.531554
10828687	Zfp523	zinc finger protein 523	-0.158392	6.63595	-2.19035	0.0422162	0.531554
10886162	Tmem63c	transmembrane protein 63c	-0.254761	8.11169	-2.19024	0.0422258	0.531554
10890342	L2hgdh	L-2-hydroxyglutarate dehydrogenase	-0.116722	4.8155	-2.18854	0.0423679	0.532197
10867389	Rgs20	regulator of G-protein signaling 20	-0.133814	5.7271	-2.18805	0.042409	0.532197
10788204	Snx25	sorting nexin 25	0.177036	7.10793	2.18794	0.0424182	0.532197
10797189	Ddx46	DEAD-box helicase 46	0.107153	7.44703	2.18739	0.0424645	0.532197
10928855	Tns1	tensin 1	0.256854	6.16062	2.18585	0.042594	0.532197
10743961	Tmem88	transmembrane protein 88	-0.117346	4.79121	-2.18572	0.0426055	0.532197
10899263	Mettl7a	methyltransferase like 7A	0.199673	6.54947	2.18462	0.0426982	0.532197
10720166	Supt5h	SPT5 homolog, DSIF elongation factor subunit	-0.109165	8.36772	-2.18456	0.0427029	0.532197
10703111	Qk	quaking	0.13976	8.69221	2.18381	0.0427665	0.532197
10858260	Rad52	RAD52 homolog, DNA repair protein	-0.131745	5.0045	-2.18336	0.0428041	0.532197
10815850	Mfsd1	major facilitator superfamily domain containing 1	0.151903	6.80495	2.18261	0.0428676	0.532197
10812270	Mctp1	multiple C2 and transmembrane domain containing 1	0.680507	6.74212	2.18196	0.0429231	0.532197
10807044	Arhgap10	Rho GTPase activating protein 10	-0.512505	5.6561	-2.18033	0.0430617	0.532197
10782852	Fermt2	FERM domain containing kindlin 2	0.112686	7.05312	2.17988	0.0431	0.532197
10893661	Gng7	G protein subunit gamma 7	0.907724	9.07942	2.17933	0.0431472	0.532197
10820613	Sv2c	synaptic vesicle glycoprotein 2c	1.0739	6.26661	2.17917	0.0431606	0.532197
10909377	Lnc215	long non-coding RNA 215	0.185593	5.57538	2.17897	0.0431776	0.532197
10825890	Gstm7	glutathione S-transferase, mu 7	0.182189	8.89897	2.17884	0.0431885	0.532197
10898889	Ano6	anoctamin 6	0.212564	5.55174	2.17847	0.04322	0.532197
10924924	Cops7b	COP9 signalosome subunit 7B	-0.21215	4.65586	-2.17799	0.0432617	0.532197
10827691	RT1-M6-2	RT1 class I, locus M6, gene 2	-0.465461	4.00577	-2.17773	0.0432836	0.532197
10900554	Pwwp3a	PWWP domain containing 3A, DNA repair factor	-0.123415	4.79708	-2.17707	0.0433402	0.532197
10713015	Gal3st3	galactose-3-O-sulfotransferase 3	-0.309352	7.35361	-2.17659	0.0433809	0.532197
10876838	Klf4	Kruppel like factor 4	0.166229	4.87797	2.17619	0.0434158	0.532197
10900263	Matk	megakaryocyte-associated tyrosine kinase	-0.151083	7.55203	-2.17534	0.0434886	0.53253
10760379	Cyth3	cytohesin 3	-0.246566	6.80344	-2.17343	0.0436527	0.533365
10938995	Itm2a	integral membrane protein 2A	0.169892	8.01007	2.17307	0.0436839	0.533365
10821771	Nipbl	NIPBL, cohesin loading factor	0.143053	6.88978	2.17287	0.0437009	0.533365
10894017	Rnf126	ring finger protein 126	-0.159253	8.30079	-2.17242	0.0437394	0.533365
10742048	Wwc1	WW and C2 domain containing 1	-0.234569	6.78655	-2.17064	0.0438939	0.534368
10739709	Sap30bp	SAP30 binding protein	-0.134089	7.02949	-2.17042	0.0439131	0.534368
10889607	Pik3cg	phosphatidylinositol-4,5-bisphosphate 3-kinase, catalytic subunit gamma	-0.165926	4.02722	-2.16962	0.0439819	0.534647
10794967	Sox4	SRY-box transcription factor 4	0.248611	5.59856	2.16849	0.0440803	0.535287
10826216	Rnpc3	RNA-binding region (RNP1, RRM) containing 3	0.195954	5.9606	2.16653	0.0442511	0.535824
10902047	Nts	neurotensin	1.38308	4.04616	2.16605	0.0442935	0.535824
10777442	Grpel1	GrpE-like 1, mitochondrial	-0.167528	4.98687	-2.16582	0.0443135	0.535824
10736520	Abr	ABR activator of RhoGEF and GTPase	-0.129534	9.67968	-2.16557	0.0443352	0.535824
10759714	Zfp358	zinc finger protein 358	-0.201693	6.4842	-2.16535	0.0443539	0.535824
10724111	Folr2	folate receptor beta	0.183184	4.45808	2.16471	0.0444107	0.535832
10822258	E2f5	E2F transcription factor 5	0.141986	4.6854	2.1643	0.0444463	0.535832
10851023	Ggt7	gamma-glutamyltransferase 7	-0.319053	7.14031	-2.1635	0.0445166	0.536075
10866512	Mgp	matrix Gla protein	0.343678	5.22411	2.16297	0.0445629	0.536075
10731517	Tvp23a	trans-golgi network vesicle protein 23 homolog A	-0.159995	6.74701	-2.16231	0.0446205	0.536075
10705358	Blvrb	biliverdin reductase B	-0.246421	4.46773	-2.16044	0.0447852	0.536075
10830058	Tysnd1	trypsin like peroxisomal matrix peptidase 1	-0.186388	5.14031	-2.15963	0.0448569	0.536075
10847728	Iftap	intraflagellar transport associated protein	-0.138682	6.84981	-2.15899	0.0449138	0.536075
10764736	Nmnat2	nicotinamide nucleotide adenylyltransferase 2	-0.184618	9.69748	-2.15877	0.0449333	0.536075
10863559	Stambp	Stam binding protein	-0.182022	6.9083	-2.15874	0.0449359	0.536075
10780491	Nop9	NOP9 nucleolar protein	-0.140548	4.41229	-2.15857	0.0449511	0.536075
10726860	Chid1	chitinase domain containing 1	-0.137414	6.43909	-2.15688	0.0451009	0.536075
10815552	Selenot	selenoprotein T	0.115084	9.28109	2.15557	0.0452175	0.536075
10780873	Spata13	spermatogenesis associated 13	0.413902	4.93623	2.15543	0.0452299	0.536075
10911765	Elovl5	ELOVL fatty acid elongase 5	0.168256	8.53773	2.15366	0.0453879	0.536075
10877532	Tnfsf15	TNF superfamily member 15	-0.364384	5.59973	-2.15312	0.0454356	0.536075
10756551	Ptcd1	pentatricopeptide repeat domain 1	-0.174924	4.83074	-2.15267	0.0454761	0.536075
10880897	Micos10	mitochondrial contact site and cristae organizing system subunit 10	0.131073	8.28213	2.15253	0.045489	0.536075
10905670	Pmm1	phosphomannomutase 1	-0.179432	7.20961	-2.15224	0.0455142	0.536075
10933130	Hsd17b10	hydroxysteroid (17-beta) dehydrogenase 10	-0.117658	7.57799	-2.15218	0.0455201	0.536075
10832705	Ccdc6	coiled-coil domain containing 6	-0.168049	7.86615	-2.1521	0.0455268	0.536075
10746825	Cacnb1	calcium voltage-gated channel auxiliary subunit beta 1	-0.14133	7.95916	-2.15011	0.0457053	0.536075
10926513	Xpo5	exportin 5	-0.104363	6.84859	-2.1501	0.0457066	0.536075
10864176	Prickle2	prickle planar cell polarity protein 2	-0.160197	7.66181	-2.14994	0.0457214	0.536075
10784125	Cryl1	crystallin, lambda 1	-0.171343	5.16552	-2.14867	0.0458351	0.536075
10820795	Tnpo1	transportin 1	0.114969	6.65767	2.14837	0.0458625	0.536075
10899839	Erbb3	erb-b2 receptor tyrosine kinase 3	0.272675	5.13371	2.14729	0.0459597	0.536075
10888596	Ehd3	EH-domain containing 3	-0.200773	9.23692	-2.14696	0.0459901	0.536075
10835779	Dab2ip	DAB2 interacting protein	-0.206602	6.65336	-2.14562	0.046111	0.536075
10901231	Timp3	TIMP metallopeptidase inhibitor 3	0.306025	7.90009	2.14545	0.0461266	0.536075
10910482	Adpgk	ADP-dependent glucokinase	0.274387	6.10855	2.1442	0.0462401	0.536075
10868398	Il11ra1	interleukin 11 receptor subunit alpha 1	-0.154419	4.27931	-2.14413	0.0462459	0.536075
10803664	Rpl7a	ribosomal protein L7a	0.141402	8.17232	2.14317	0.0463331	0.536075
10723379	Tlnrd1	talin rod domain containing 1	0.135495	5.08011	2.14309	0.046341	0.536075
10789929	Prkcd	protein kinase C, delta	0.60454	5.56035	2.14223	0.0464187	0.536075
10802716	Dym	dymeclin	-0.122466	7.46274	-2.1422	0.0464217	0.536075
10877067	LOC102550203	zinc finger protein 120-like	0.176435	5.49945	2.14194	0.0464457	0.536075
10703434	Spaca6	sperm acrosome associated 6	-0.171614	5.49472	-2.14177	0.0464612	0.536075
10900478	Scamp4	secretory carrier membrane protein 4	-0.139804	5.98509	-2.1405	0.0465767	0.536075
10940464	Cryga	crystallin, gamma A	-0.228136	4.75	-2.13982	0.0466392	0.536075
10870020	Nfia	nuclear factor I/A	0.169821	8.57383	2.13949	0.04667	0.536075
10810631	Tppp3	tubulin polymerization-promoting protein family member 3	0.353083	6.26567	2.13852	0.0467587	0.536075
10706246	LOC100362023	CDC42 small effector 2-like	-0.139657	8.44439	-2.13846	0.0467644	0.536075
10857718	Cpne9	copine family member 9	-0.443844	4.5648	-2.13844	0.0467655	0.536075
10726624	Olr288	olfactory receptor 288	-0.126519	4.01406	-2.13839	0.0467705	0.536075
10817324	Vps72	vacuolar protein sorting 72 homolog	-0.171125	6.97293	-2.13829	0.0467798	0.536075
10904161	Sla	src-like adaptor	0.419764	4.49338	2.13807	0.0467995	0.536075
10721486	Tbc1d17	TBC1 domain family, member 17	-0.198151	6.43632	-2.13745	0.0468565	0.536075
10705100	Zfp574	zinc finger protein 574	-0.121769	6.47941	-2.13731	0.0468695	0.536075
10791989	Prag1	PEAK1 related kinase activating pseudokinase 1	-0.32562	6.80583	-2.13404	0.0471717	0.536075
10732553	Axin1	axin 1	0.122177	5.91867	2.13383	0.0471909	0.536075
10808931	Pard3	par-3 family cell polarity regulator	0.450304	4.88418	2.1338	0.0471939	0.536075
10845767	Cobll1	cordon-bleu WH2 repeat protein-like 1	0.117534	5.10863	2.13365	0.0472074	0.536075
10750473	Get1	guided entry of tail-anchored proteins factor 1	-0.115841	7.29054	-2.13356	0.0472158	0.536075
10908729	Igsf9b	immunoglobulin superfamily, member 9B	-0.283285	5.83511	-2.13302	0.0472659	0.536075
10874223	Dnajc11	DnaJ heat shock protein family (Hsp40) member C11	-0.149921	7.05608	-2.13287	0.0472801	0.536075
10705971	Tbcb	tubulin folding cofactor B	-0.175891	7.47271	-2.13275	0.0472905	0.536075
10891160	Npc2	NPC intracellular cholesterol transporter 2	0.143872	6.52323	2.13184	0.0473752	0.536075
10746425	Xylt2	xylosyltransferase 2	-0.161935	4.45458	-2.13175	0.0473837	0.536075
10760687	Sun1	Sad1 and UNC84 domain containing 1	-0.156404	7.88138	-2.13166	0.047392	0.536075
10870587	Ttc22	tetratricopeptide repeat domain 22	-0.309334	4.50318	-2.13164	0.0473937	0.536075
10746087	Dynll2	dynein light chain LC8-type 2	0.154495	9.07532	2.13148	0.0474092	0.536075
10905558	Rpl26	ribosomal protein L26	0.144491	7.89579	2.13016	0.0475322	0.536075
10904688	Gfus	GDP-L-fucose synthase	-0.2043	5.38395	-2.13011	0.0475363	0.536075
10759277	Pus1	pseudouridine synthase 1	-0.101369	4.1035	-2.12976	0.0475691	0.536075
10868541	Rgp1	RGP1 homolog, RAB6A GEF complex partner 1	-0.120988	6.55955	-2.12891	0.0476483	0.536075
10937492	Mageh1	MAGE family member H1	0.125845	5.9698	2.12876	0.0476626	0.536075
10706650	Pnkp	polynucleotide kinase 3'-phosphatase	-0.144691	4.22731	-2.12856	0.0476815	0.536075
10915837	LOC500959	triosephosphate isomerase	-0.146917	9.89145	-2.12853	0.0476837	0.536075
10932066	Klhl13	kelch-like family member 13	0.625125	7.15982	2.12809	0.0477245	0.536075
10875300	Penk	proenkephalin	0.844848	8.36345	2.12679	0.0478464	0.536791
10852595	Sox18	SRY-box transcription factor 18	-0.356956	4.23636	-2.1264	0.0478834	0.536791
10744318	Eif5a	eukaryotic translation initiation factor 5A	-0.121689	10.3073	-2.12575	0.0479441	0.536791
10733888	Olr1448	olfactory receptor 1448	-0.155948	6.01916	-2.12514	0.0480018	0.536791
10720992	Gpi	glucose-6-phosphate isomerase	-0.102264	11.1183	-2.12496	0.0480181	0.536791
10772967	Dhx15	DEAH-box helicase 15	0.144176	7.04414	2.12427	0.0480838	0.537012
10909639	Fxyd6	FXYD domain-containing ion transport regulator 6	-0.298506	8.18322	-2.12229	0.0482701	0.5384
10736720	Tmem132e	transmembrane protein 132E	0.22941	4.37202	2.12197	0.0483002	0.5384
10905560	Mrtfa	myocardin related transcription factor A	-0.21849	6.52047	-2.12102	0.0483903	0.53889
10796445	Vim	vimentin	0.488042	7.91683	2.11854	0.048626	0.54015
10783159	Pip4p1	phosphatidylinositol-4,5-bisphosphate 4-phosphatase 1	-0.179162	6.73695	-2.11784	0.0486922	0.54015
10769075	Brinp2	BMP/retinoic acid inducible neural specific 2	-0.374631	8.08509	-2.11783	0.0486933	0.54015
10791995	LOC100910088	prolow-density lipoprotein receptor-related protein 1-like	-0.650816	5.65431	-2.11742	0.0487321	0.54015
10829378	Col18a1	collagen type XVIII alpha 1 chain	0.175125	4.21781	2.1167	0.0488011	0.54015
10788510	Tnks	tankyrase	0.142378	7.24516	2.11662	0.0488085	0.54015
10870342	Pde4b	phosphodiesterase 4B	0.128173	7.66918	2.11643	0.0488271	0.54015
10819245	Manba	mannosidase beta	-0.148472	5.2402	-2.11489	0.0489739	0.541261
10727603	Lrfn4	leucine rich repeat and fibronectin type III domain containing 4	-0.140454	6.52027	-2.11334	0.0491228	0.541672
10710958	Kctd13	potassium channel tetramerization domain containing 13	-0.196092	9.34174	-2.11328	0.0491289	0.541672
10906296	Odf3b	outer dense fiber of sperm tails 3B	0.30143	4.02982	2.11305	0.0491502	0.541672
10740649	Mgrn1	mahogunin ring finger 1	-0.133672	8.88279	-2.11158	0.0492923	0.542001
10815927	Nmd3	NMD3 ribosome export adaptor	-0.151599	6.55308	-2.11157	0.0492929	0.542001
10863115	Rmnd5a	required for meiotic nuclear division 5 homolog A	0.116767	6.75031	2.1113	0.0493192	0.542001
10891156	Syndig1l	synapse differentiation inducing 1-like	0.956735	5.882	2.11021	0.0494238	0.54264
10835958	Lhx2	LIM homeobox 2	-0.221503	7.46399	-2.10755	0.0496818	0.543053
10843380	Ndor1	NADPH dependent diflavin oxidoreductase 1	-0.221957	5.97086	-2.10726	0.0497096	0.543053
10781355	Phyhip	phytanoyl-CoA 2-hydroxylase interacting protein	-0.156379	9.75322	-2.10668	0.0497658	0.543053
10740153	Mrpl12	mitochondrial ribosomal protein L12	-0.123416	5.19505	-2.10628	0.0498051	0.543053
10930660	Pros1	protein S	0.234397	4.87421	2.10584	0.0498478	0.543053
10841624	Src	SRC proto-oncogene, non-receptor tyrosine kinase	-0.17635	7.12574	-2.10503	0.0499266	0.543053
10875322	Son	SON DNA and RNA binding protein	0.112855	6.93755	2.1048	0.0499487	0.543053
10755580	Arvcf	ARVCF, delta catenin family member	-0.135505	5.15434	-2.10425	0.0500028	0.543053
10792344	Sfrp1	secreted frizzled-related protein 1	0.493696	5.73456	2.10424	0.0500035	0.543053
10879667	Akirin1	akirin 1	-0.146952	7.7072	-2.10356	0.0500699	0.543053
10820282	Vcan	versican	0.19952	5.86164	2.10223	0.0502004	0.543053
10718666	Apeg3	antisense paternally expressed gene 3	0.243205	5.5758	2.10161	0.0502612	0.543053
10725387	Cdr2	cerebellar degeneration-related protein 2	0.203113	5.77425	2.10119	0.050302	0.543053
10769752	Dusp12	dual specificity phosphatase 12	-0.2957	5.89904	-2.10107	0.0503135	0.543053
10753732	Rpl24	ribosomal protein L24	0.101565	6.35911	2.10082	0.0503383	0.543053
10847854	Caprin1	cell cycle associated protein 1	0.0898217	9.1428	2.09904	0.050513	0.543053
10763547	Tmem185b	transmembrane protein 185B	-0.118272	7.44868	-2.09887	0.0505307	0.543053
10725832	Aldoa	aldolase, fructose-bisphosphate A	-0.117329	11.1507	-2.09854	0.050563	0.543053
10808708	Def8	differentially expressed in FDCP 8 homolog	-0.130511	5.90995	-2.0976	0.050656	0.543053
10834958	Coq4	coenzyme Q4	-0.173414	5.72269	-2.09751	0.0506644	0.543053
10927332	Kansl3	KAT8 regulatory NSL complex subunit 3	-0.135289	6.83394	-2.09736	0.0506793	0.543053
10794195	Drd1	dopamine receptor D1	1.13417	6.32384	2.09661	0.0507532	0.543053
10740094	Baiap2	BAR/IMD domain containing adaptor protein 2	-0.116439	9.29765	-2.09452	0.0509607	0.543053
10787313	Slc27a1	solute carrier family 27 member 1	-0.159502	8.04289	-2.09404	0.0510078	0.543053
10906208	Dennd6b	DENN domain containing 6B	-0.140113	6.61426	-2.09332	0.0510794	0.543053
10868817	Tmod1	tropomodulin 1	-0.275653	7.33507	-2.09273	0.0511387	0.543053
10741009	Ntn3	netrin 3	-0.194074	5.43034	-2.09246	0.0511654	0.543053
10774369	Sertad2	SERTA domain containing 2	0.123101	5.73736	2.09237	0.0511738	0.543053
10862254	Fam131b	family with sequence similarity 131, member B	-0.290164	7.4482	-2.09203	0.0512082	0.543053
10909849	Drd2	dopamine receptor D2	1.31261	6.29948	2.09183	0.051228	0.543053
10713452	Trmt112	tRNA methyltransferase activator subunit 11-2	-0.107113	9.59031	-2.09177	0.0512345	0.543053
10707418	Cyfip1	cytoplasmic FMR1 interacting protein 1	0.119123	6.82954	2.09166	0.0512451	0.543053
10797127	Smad5	SMAD family member 5	0.136071	5.85514	2.09084	0.0513274	0.543053
10899107	Kcnh3	potassium voltage-gated channel subfamily H member 3	-0.413499	8.27091	-2.09053	0.0513583	0.543053
10739845	Mgat5b	alpha-1,6-mannosylglycoprotein 6-beta-N-acetylglucosaminyltransferase B	-0.236658	6.70802	-2.09006	0.0514048	0.543053
10873838	Dhrs3	dehydrogenase/reductase 3	-0.271346	5.7386	-2.08948	0.0514634	0.543053
10789301	Csmd1	CUB and Sushi multiple domains 1	-0.203743	6.60791	-2.0892	0.0514915	0.543053
10852907	Cdk5	cyclin-dependent kinase 5	-0.162274	7.82378	-2.0891	0.0515013	0.543053
10937302	Htr2c	5-hydroxytryptamine receptor 2C	0.892199	7.6608	2.08874	0.0515369	0.543053
10869151	Tmem38b	transmembrane protein 38B	0.1118	5.18527	2.08752	0.05166	0.543053
10761758	Hip1r	huntingtin interacting protein 1 related	-0.138141	5.18016	-2.08689	0.0517232	0.543053
10859774	Resf1	retroelement silencing factor 1	0.1712	4.95403	2.08671	0.0517408	0.543053
10740196	Aspscr1	ASPSCR1 tether for SLC2A4, UBX domain containing	-0.123355	6.48162	-2.08633	0.0517795	0.543053
10808637	Cdk10	cyclin-dependent kinase 10	-0.125438	6.99997	-2.08608	0.0518049	0.543053
10833713	Smpd2	sphingomyelin phosphodiesterase 2	0.183946	4.13345	2.08606	0.0518068	0.543053
10706221	LOC690000	similar to CG3740-PA	-0.178809	5.5567	-2.08547	0.051866	0.543053
10745994	Ypel2	yippee-like 2	-0.137433	7.55281	-2.08487	0.0519272	0.543053
10899545	Sp1	Sp1 transcription factor	0.139046	4.76747	2.08361	0.0520544	0.543053
10706820	Gys1	glycogen synthase 1	-0.139402	5.67318	-2.08308	0.0521075	0.543053
10832511	Cabin1	calcineurin binding protein 1	-0.121339	6.40752	-2.08308	0.0521077	0.543053
10863904	Sec61a1	SEC61 translocon subunit alpha 1	0.117815	7.98971	2.08295	0.0521208	0.543053
10715813	Mfsd13a	major facilitator superfamily domain containing 13A	-0.139489	5.87669	-2.08274	0.0521421	0.543053
10796324	Camk1d	calcium/calmodulin-dependent protein kinase ID	-0.121216	7.35793	-2.08234	0.0521827	0.543053
10843028	Tpd52l2	TPD52 like 2	-0.25556	6.48387	-2.08221	0.0521965	0.543053
10920222	Rnf123	ring finger protein 123	-0.153983	6.946	-2.08203	0.0522139	0.543053
10937641	Arhgap6	Rho GTPase activating protein 6	0.670164	5.60138	2.08188	0.0522293	0.543053
10935962	Plxnb3	plexin B3	0.208742	4.68306	2.08188	0.0522297	0.543053
10780408	Rnf31	ring finger protein 31	-0.156409	5.79712	-2.08132	0.0522861	0.543053
10910708	Cln6	CLN6, transmembrane ER protein	-0.161181	5.44971	-2.08112	0.0523063	0.543053
10848113	Olr769	olfactory receptor 769	0.26742	4.1269	2.0807	0.0523491	0.543053
10903853	RGD1310852	similar to RIKEN cDNA 9130401M01	-0.158572	5.10848	-2.0803	0.0523901	0.543053
10879797	Ago3	argonaute RISC catalytic component 3	0.120376	5.7634	2.07916	0.0525065	0.543111
10741330	Tmem204	transmembrane protein 204	-0.159944	4.69844	-2.07761	0.0526642	0.543111
10737949	Ppp1r1b	protein phosphatase 1, regulatory (inhibitor) subunit 1B	0.775662	7.1607	2.07756	0.0526696	0.543111
10916167	Slc37a2	solute carrier family 37 member 2	-0.196237	4.35587	-2.07752	0.0526738	0.543111
10862643	Fkbp14	FKBP prolyl isomerase 14	0.173635	4.73039	2.07731	0.0526949	0.543111
10856472	LRRTM1	leucine rich repeat transmembrane neuronal 1	-0.129034	8.76173	-2.07713	0.052714	0.543111
10789736	Plac9	placenta associated 9	-0.092236	4.48429	-2.07706	0.0527211	0.543111
10745238	Sarm1	sterile alpha and TIR motif containing 1	-0.161389	5.73072	-2.07522	0.0529099	0.543336
10897386	Zfp7	zinc finger protein 7	-0.143957	4.8236	-2.07494	0.0529386	0.543336
10790674	Ap1m1	adaptor related protein complex 1 subunit mu 1	-0.123625	8.32452	-2.07431	0.0530029	0.543336
10802391	Gnal	G protein subunit alpha L	0.793165	8.18029	2.0733	0.0531077	0.543336
10933393	Glra2	glycine receptor, alpha 2	0.348156	6.75655	2.07315	0.0531223	0.543336
10852896	Fastk	Fas-activated serine/threonine kinase	-0.184491	6.8645	-2.07315	0.0531224	0.543336
10887615	Crip2	cysteine-rich protein 2	-0.204109	7.74364	-2.07288	0.0531504	0.543336
10809269	Cx3cl1	C-X3-C motif chemokine ligand 1	-0.187311	10.3639	-2.07225	0.053216	0.543336
10839154	Pdia3	protein disulfide isomerase family A, member 3	0.110992	9.57919	2.07155	0.0532878	0.543336
10748765	Slc39a11	solute carrier family 39, member 11	-0.100084	5.29411	-2.07132	0.0533122	0.543336
10926503	Yipf3	Yip1 domain family, member 3	-0.155799	6.86467	-2.07035	0.0534117	0.543336
10771426	Sec31a	SEC31 homolog A, COPII coat complex component	-0.120167	7.30874	-2.07012	0.0534363	0.543336
10784416	Ints6	integrator complex subunit 6	0.107325	5.40707	2.06947	0.0535036	0.543336
10785618	Uqcr10	ubiquinol-cytochrome c reductase, complex III subunit X	-0.120725	5.0246	-2.06827	0.0536279	0.543336
10934384	Nono	non-POU domain containing, octamer-binding	0.12913	7.65832	2.06826	0.0536286	0.543336
10874811	C1qtnf12	C1q and TNF related 12	-0.12682	4.14829	-2.06788	0.0536683	0.543336
10754120	Lsamp	limbic system-associated membrane protein	-0.101574	9.19977	-2.06758	0.0536995	0.543336
10887593	Mta1	metastasis associated 1	-0.107893	7.88597	-2.0673	0.0537285	0.543336
10857412	Slc25a26	solute carrier family 25 member 26	-0.13632	6.19475	-2.06646	0.0538167	0.543336
10713538	Plaat3	phospholipase A and acyltransferase 3	0.169912	7.25807	2.06644	0.0538187	0.543336
10748498	Rgs9	regulator of G-protein signaling 9	1.14008	5.92281	2.06592	0.0538731	0.543336
10842517	Cstf1	cleavage stimulation factor subunit 1	-0.14301	5.97495	-2.06581	0.0538844	0.543336
10712245	Phrf1	PHD and ring finger domains 1	-0.101781	5.94655	-2.06561	0.0539057	0.543336
10808247	Cmip	c-Maf-inducing protein	-0.166242	8.30609	-2.06417	0.054056	0.543636
10710848	Rabep2	rabaptin, RAB GTPase binding effector protein 2	-0.124459	4.45063	-2.06416	0.0540565	0.543636
10844717	Ttll11	tubulin tyrosine ligase like11	-0.336653	7.63181	-2.06313	0.054165	0.543636
10855185	Rpl30	ribosomal protein L30	0.159397	8.05501	2.06306	0.0541723	0.543636
10940656	Eml1	EMAP like 1	0.143895	7.24527	2.06278	0.0542015	0.543636
10914517	Tmem42	transmembrane protein 42	-0.143243	5.0801	-2.06246	0.0542354	0.543636
10722084	Sergef	secretion regulating guanine nucleotide exchange factor	-0.136987	6.5391	-2.06203	0.0542808	0.543636
10708760	Alg8	ALG8, alpha-1,3-glucosyltransferase	-0.13917	5.30721	-2.06177	0.0543078	0.543636
10819633	Znhit6	zinc finger, HIT-type containing 6	0.11116	6.29648	2.06057	0.0544339	0.544172
10851210	Ndrg3	NDRG family member 3	-0.155436	8.66055	-2.06038	0.0544545	0.544172
10747537	Aarsd1	alanyl-tRNA synthetase domain containing 1	-0.107674	6.63184	-2.05986	0.0545092	0.544254
10885045	Psma3	proteasome 20S subunit alpha 3	-0.118308	8.50619	-2.05938	0.0545596	0.544292
10932740	Hnrnpa1	heterogeneous nuclear ribonucleoprotein A1	0.133385	8.69733	2.05692	0.0548206	0.544796
10853644	Dync1i1	dynein cytoplasmic 1 intermediate chain 1	-0.183155	7.64397	-2.05684	0.0548291	0.544796
10891303	Tgfb3	transforming growth factor, beta 3	-0.126868	4.34874	-2.05649	0.0548654	0.544796
10877896	Fam29a	family with sequence similarity 29, member A	0.175751	4.88916	2.05633	0.0548827	0.544796
10820108	Slf1	SMC5-SMC6 complex localization factor 1	0.127631	4.88585	2.0553	0.0549928	0.544796
10729409	Tjp2	tight junction protein 2	0.145493	5.60439	2.05521	0.0550015	0.544796
10732607	Rhbdf1	rhomboid 5 homolog 1	-0.139142	4.88143	-2.05443	0.0550853	0.544796
10733972	Jmjd4	jumonji domain containing 4	-0.114124	4.32875	-2.05433	0.0550953	0.544796
10758624	Cux2	cut-like homeobox 2	-0.372186	6.30737	-2.05401	0.0551293	0.544796
10704413	Napa	NSF attachment protein alpha	-0.227633	8.93148	-2.0538	0.0551516	0.544796
10900601	Atp5f1d	ATP synthase F1 subunit delta	-0.126153	9.4636	-2.0536	0.0551733	0.544796
10778404	Tns3	tensin 3	0.137838	6.02302	2.05315	0.0552211	0.544796
10765740	Kcnj10	potassium inwardly-rectifying channel, subfamily J, member 10	0.137087	7.85608	2.05262	0.0552778	0.544796
10894878	Lta4h	leukotriene A4 hydrolase	0.139643	5.79519	2.05232	0.0553097	0.544796
10875771	Klhl32	kelch-like family member 32	-0.13292	5.11068	-2.04958	0.0556036	0.547229
10818896	Ndst4	N-deacetylase and N-sulfotransferase 4	1.42458	4.42264	2.04869	0.0557001	0.547354
10758854	Rnft2	ring finger protein, transmembrane 2	-0.102632	7.38856	-2.0485	0.0557196	0.547354
10864569	Oxtr	oxytocin receptor	0.354973	4.17814	2.04784	0.0557915	0.547354
10784101	Zmym5	zinc finger MYM-type containing 5	0.180219	6.93986	2.04763	0.0558134	0.547354
10847584	Ext2	exostosin glycosyltransferase 2	-0.172973	6.29117	-2.04729	0.0558506	0.547354
10816507	Smg5	SMG5 nonsense mediated mRNA decay factor	-0.0935823	6.51872	-2.04631	0.0559563	0.547931
10734212	Kcnj12	potassium inwardly-rectifying channel, subfamily J, member 12	-0.20346	5.69796	-2.04566	0.0560269	0.548162
10894842	Ikbip	IKBKB interacting protein	0.131908	4.37215	2.04407	0.0561985	0.54868
10837744	C1qtnf4	C1q and TNF related 4	-0.175414	7.12286	-2.04312	0.0563019	0.54868
10856296	Reep1	receptor accessory protein 1	-0.142833	8.11305	-2.04305	0.0563096	0.54868
10857950	Atg7	autophagy related 7	-0.180871	5.81309	-2.04293	0.0563227	0.54868
10934579	Cox7b	cytochrome c oxidase subunit 7B	0.126621	8.22233	2.0429	0.0563257	0.54868
10817383	Cers2	ceramide synthase 2	0.194147	7.26657	2.04257	0.0563616	0.54868
10752050	Tra2b	transformer 2 beta homolog	0.122955	7.2567	2.0412	0.0565112	0.549678
10839508	Blvra	biliverdin reductase A	-0.244899	5.77463	-2.03943	0.0567039	0.550022
10885191	LOC100361944	hypothetical protein LOC100361944	0.159103	5.8683	2.03902	0.0567496	0.550022
10862190	Try10	trypsin 10	-0.137563	4.19884	-2.03862	0.0567928	0.550022
10752451	Thap7	THAP domain containing 7	-0.165817	5.42373	-2.03795	0.0568666	0.550022
10857130	Mgll	monoglyceride lipase	-0.174108	8.44442	-2.03727	0.056941	0.550022
10834360	Bmyc	brain expressed myelocytomatosis oncogene	-0.243728	7.20393	-2.03711	0.0569591	0.550022
10841592	Rab5if	RAB5 interacting factor	-0.110223	7.29279	-2.0367	0.0570041	0.550022
10923877	Adam23	ADAM metallopeptidase domain 23	0.103306	8.24419	2.03656	0.0570187	0.550022
10811883	Pgbd5	piggyBac transposable element derived 5	-0.163638	7.76934	-2.03504	0.0571862	0.550022
10729009	Dtx4	deltex E3 ubiquitin ligase 4	-0.398325	6.10514	-2.03496	0.0571947	0.550022
10842765	Mtg2	mitochondrial ribosome-associated GTPase 2	0.114873	4.95642	2.03492	0.0571994	0.550022
10735375	Zfp3	zinc finger protein 3	-0.150083	4.73072	-2.03459	0.0572359	0.550022
10783011	Slc35f4	solute carrier family 35, member F4	-0.264284	5.93107	-2.03457	0.0572383	0.550022
10880504	Extl1	exostosin-like glycosyltransferase 1	-0.230556	6.45	-2.03444	0.0572528	0.550022
10734250	B9d1	B9 domain containing 1	-0.125166	6.43658	-2.0319	0.0575328	0.550037
10829771	Cabcoco1	ciliary associated calcium binding coiled-coil 1	0.206219	5.84004	2.03085	0.0576502	0.550037
10810295	Dnajb1	DnaJ heat shock protein family (Hsp40) member B1	0.212748	6.35858	2.03048	0.0576908	0.550037
10827138	Sh3glb1	SH3 domain -containing GRB2-like endophilin B1	0.100484	7.66718	2.02958	0.0577906	0.550037
10739781	Ten1	TEN1 subunit of CST complex	-0.202396	7.98961	-2.02921	0.0578319	0.550037
10709385	Olr59	olfactory receptor 59	-0.428645	4.1456	-2.02916	0.0578374	0.550037
10865081	Adipor2	adiponectin receptor 2	0.130419	6.37763	2.02831	0.0579323	0.550037
10792024	Mfhas1	multifunctional ROCO family signaling regulator 1	0.154516	5.79316	2.02828	0.0579359	0.550037
10940571	Gpr26	G protein-coupled receptor 26	-0.38531	8.08472	-2.028	0.057967	0.550037
10890734	Rab15	RAB15, member RAS oncogene family	-0.170415	8.11275	-2.0278	0.0579893	0.550037
10702611	Plekhg1	pleckstrin homology and RhoGEF domain containing G1	0.137053	6.29846	2.02722	0.0580547	0.550037
10726251	Ikzf5	IKAROS family zinc finger 5	-0.104849	8.29137	-2.02667	0.0581156	0.550037
10935265	Ocrl	OCRL, inositol polyphosphate-5-phosphatase	0.146114	6.82566	2.02477	0.0583282	0.550037
10917116	Zbtb16	zinc finger and BTB domain containing 16	-0.524305	6.31476	-2.02411	0.0584031	0.550037
10701792	Epm2a	EPM2A glucan phosphatase, laforin	-0.160595	7.30888	-2.02249	0.058585	0.550037
10893499	Celf5	CUGBP, Elav-like family member 5	-0.132362	9.0008	-2.022	0.05864	0.550037
10921141	Fyco1	FYVE and coiled-coil domain autophagy adaptor 1	0.141773	6.21047	2.0212	0.0587301	0.550037
10812077	Pcnx2	pecanex 2	-0.226134	7.67843	-2.02108	0.0587433	0.550037
10774766	Rtn4	reticulon 4	0.149704	8.80263	2.0206	0.0587978	0.550037
10926496	Lrrc73	leucine rich repeat containing 73	-0.271164	6.52778	-2.01975	0.0588945	0.550037
10857826	Creld1	cysteine-rich with EGF-like domains 1	-0.141202	6.11261	-2.01951	0.0589212	0.550037
10904756	Puf60	poly-U binding splicing factor 60	-0.0931174	7.65707	-2.01907	0.0589709	0.550037
10837778	Psmc3	proteasome 26S subunit, ATPase 3	-0.106516	6.71489	-2.01907	0.058971	0.550037
10723210	Wdr73	WD repeat domain 73	-0.135907	5.46115	-2.01903	0.0589761	0.550037
10890951	Slc8a3	solute carrier family 8 member A3	0.195704	5.47786	2.01878	0.0590042	0.550037
10862842	Hpgds	hematopoietic prostaglandin D synthase	-0.140505	4.03002	-2.01791	0.0591032	0.550037
10794576	Tbc1d7	TBC1 domain family, member 7	-0.227487	5.90384	-2.01726	0.0591765	0.550037
10925683	Neu4	neuraminidase 4	0.0938248	4.78146	2.01723	0.0591801	0.550037
10811663	Galns	galactosamine (N-acetyl)-6-sulfatase	-0.121309	5.41519	-2.01713	0.059191	0.550037
10871133	Mknk1	MAPK interacting serine/threonine kinase 1	-0.134299	6.29474	-2.01667	0.0592436	0.550037
10903325	Ankrd46	ankyrin repeat domain 46	-0.136779	8.31656	-2.01651	0.0592615	0.550037
10899268	Letmd1	LETM1 domain containing 1	-0.129223	6.68873	-2.01648	0.0592656	0.550037
10889649	Hdac9	histone deacetylase 9	-0.34052	8.11997	-2.01618	0.0592994	0.550037
10790863	Fcho1	FCH and mu domain containing endocytic adaptor 1	-0.217988	6.73188	-2.01584	0.0593382	0.550037
10774115	Ramp3	receptor activity modifying protein 3	-0.494591	4.89559	-2.01518	0.0594136	0.550037
10756931	Ttyh3	tweety family member 3	-0.206264	9.20105	-2.01444	0.0594978	0.550037
10934555	Magee1	MAGE family member E1	-0.168654	5.86256	-2.01401	0.0595469	0.550037
10913201	Mir191	microRNA 191	-0.169063	4.01952	-2.01397	0.0595513	0.550037
10760971	Pcolce	procollagen C-endopeptidase enhancer	0.167356	4.2729	2.0132	0.0596392	0.550037
10809411	Ogfod1	2-oxoglutarate and iron-dependent oxygenase domain containing 1	-0.115501	7.83875	-2.01307	0.0596547	0.550037
10849967	Dnaaf9	dynein axonemal assembly factor 9	0.12966	7.83475	2.01307	0.0596551	0.550037
10860724	Pex1	peroxisomal biogenesis factor 1	-0.0890969	5.63917	-2.01263	0.0597051	0.550037
10853300	Abcb1a	ATP binding cassette subfamily B member 1A	-0.12879	7.39576	-2.00898	0.0601252	0.550037
10822099	Otulin	OTU deubiquitinase with linear linkage specificity	0.104413	5.27468	2.00861	0.0601677	0.550037
10776739	Uchl1	ubiquitin C-terminal hydrolase L1	-0.115781	10.9623	-2.00857	0.0601716	0.550037
10709200	Pde2a	phosphodiesterase 2A	-0.121694	9.21209	-2.00836	0.0601962	0.550037
10931717	C3	complement C3	0.263696	4.70629	2.00799	0.0602384	0.550037
10880047	Tmem39b	transmembrane protein 39b	-0.127707	5.70976	-2.00759	0.0602847	0.550037
10893688	Lingo3	leucine rich repeat and Ig domain containing 3	0.382612	6.02653	2.00738	0.0603094	0.550037
10719671	Zfp575	zinc finger protein 575	-0.333353	4.96756	-2.00731	0.0603175	0.550037
10756102	Ctxn1	cortexin 1	-0.156714	10.9091	-2.00701	0.0603522	0.550037
10889560	Bcap29	B-cell receptor-associated protein 29	-0.204968	6.60114	-2.00637	0.0604267	0.550037
10831267	Vars1	valyl-tRNA synthetase 1	-0.138207	4.95011	-2.00615	0.0604522	0.550037
10769723	Nos1ap	nitric oxide synthase 1 adaptor protein	-0.320674	7.19072	-2.00601	0.0604685	0.550037
10736450	Ankrd13b	ankyrin repeat domain 13B	-0.155303	6.50513	-2.00557	0.0605188	0.550037
10743110	Guk1	guanylate kinase 1	-0.16743	8.48357	-2.00494	0.0605922	0.550037
10820546	Rpl32	ribosomal protein L32	0.120677	11.9712	2.00462	0.0606294	0.550037
10869253	Ugcg	UDP-glucose ceramide glucosyltransferase	-0.255444	8.71783	-2.0046	0.0606311	0.550037
10923700	Fam117b	family with sequence similarity 117, member B	-0.105861	7.9225	-2.00448	0.0606453	0.550037
10926238	Treml1	triggering receptor expressed on myeloid cells-like 1	-0.12864	4.5278	-2.00431	0.0606658	0.550037
10931387	Ranbp3	RAN binding protein 3	-0.103039	7.14306	-2.00425	0.0606717	0.550037
10781214	Pnma2	PNMA family member 2	-0.130195	6.94429	-2.00398	0.0607035	0.550037
10782210	Vdac2	voltage-dependent anion channel 2	0.119861	9.341	2.00393	0.0607098	0.550037
10871286	Prdx1	peroxiredoxin 1	0.170277	7.92792	2.0038	0.0607251	0.550037
10901823	Tmpo	thymopoietin	0.196579	5.88874	2.00371	0.0607348	0.550037
10913640	Scap	SREBF chaperone	-0.103606	7.82658	-2.0031	0.0608064	0.550037
10825113	Plekho1	pleckstrin homology domain containing O1	-0.304637	7.96242	-2.0027	0.0608524	0.550037
10799848	Nebl	nebulette	0.105167	4.58113	2.00243	0.0608845	0.550037
10738576	Grn	granulin precursor	-0.119634	6.68885	-2.00232	0.0608968	0.550037
10834225	Npdc1	neural proliferation, differentiation and control, 1	-0.0984034	8.40672	-2.00212	0.0609205	0.550037
10933780	Sts	steroid sulfatase	-0.16493	5.07142	-2.00161	0.0609799	0.550037
10773999	Dbnl	drebrin-like	-0.135978	7.04784	-2.00157	0.0609846	0.550037
10725286	Gpr139	G protein-coupled receptor 139	0.259936	4.38183	2.00157	0.0609848	0.550037
10731851	Crebbp	CREB binding protein	-0.144898	6.16428	-2.00116	0.061033	0.550037
10899378	Tamalin	trafficking regulator and scaffold protein tamalin	-0.373491	6.43707	-2.00098	0.0610537	0.550037
10905793	Poldip3	DNA polymerase delta interacting protein 3	-0.092689	7.35473	-2.00076	0.0610788	0.550037
10732941	Ebf1	EBF transcription factor 1	0.210338	5.07785	2.00028	0.0611351	0.550037
10876052	Bag1	BAG cochaperone 1	0.201513	6.86575	2.00003	0.0611643	0.550037
10785355	Serp2	stress-associated endoplasmic reticulum protein family member 2	-0.156552	6.65377	-1.99994	0.061175	0.550037
10811861	Abcb10	ATP binding cassette subfamily B member 10	-0.195257	5.42505	-1.99968	0.0612055	0.550037
10859282	Fam234b	family with sequence similarity 234, member B	-0.18292	8.50503	-1.99963	0.061212	0.550037
10817552	Txnip	thioredoxin interacting protein	0.257765	7.36719	1.99956	0.0612195	0.550037
10816875	LOC361985	similar to NICE-3	-0.118457	7.55718	-1.99931	0.0612485	0.550037
10763587	Slc35f5	solute carrier family 35, member F5	-0.151173	5.36621	-1.99914	0.0612689	0.550037
10721536	Ap2a1	adaptor related protein complex 2 subunit alpha 1	-0.155503	8.95277	-1.99911	0.0612723	0.550037
10724377	Trim5	tripartite motif-containing 5	0.149899	4.64042	1.9984	0.0613558	0.550037
10821749	Wdr70	WD repeat domain 70	-0.132327	6.54935	-1.99836	0.0613601	0.550037
10774830	Psme4	proteasome activator subunit 4	0.136484	6.29972	1.99702	0.0615187	0.550037
10925970	Dlgap1	DLG associated protein 1	-0.287043	9.07977	-1.99689	0.0615335	0.550037
10761227	Stx1a	syntaxin 1A	-0.536408	8.92425	-1.99684	0.061539	0.550037
10713402	Rasgrp2	RAS guanyl releasing protein 2	0.609938	5.01153	1.99585	0.0616561	0.550225
10926317	Usp49	ubiquitin specific peptidase 49	-0.128941	4.59254	-1.99525	0.061727	0.550225
10871471	Med8	mediator complex subunit 8	-0.12051	6.02457	-1.99501	0.0617553	0.550225
10720262	Nfkbib	NFKB inhibitor beta	-0.181971	6.23829	-1.99477	0.0617834	0.550225
10818698	Cnn3	calponin 3	0.174911	7.99708	1.99233	0.0620719	0.550225
10900459	Csnk1g2	casein kinase 1, gamma 2	-0.153633	7.54365	-1.99204	0.062107	0.550225
10905625	Rangap1	RAN GTPase activating protein 1	-0.141268	7.7131	-1.99173	0.0621432	0.550225
10837767	Celf1	CUGBP, Elav-like family member 1	-0.133661	7.473	-1.99168	0.062149	0.550225
10851342	Tti1	TELO2 interacting protein 1	-0.120193	7.7003	-1.99086	0.0622467	0.550225
10762665	Pxn	paxillin	-0.148634	5.72548	-1.99055	0.062284	0.550225
10907357	Krt83	keratin 83	0.136665	4.04072	1.99042	0.0622995	0.550225
10810658	Agrp	agouti related neuropeptide	-0.128053	4.43404	-1.99012	0.0623346	0.550225
10899278	Slc4a8	solute carrier family 4 member 8	-0.155441	6.2919	-1.98918	0.062447	0.550225
10763477	Nifk	nucleolar protein interacting with the FHA domain of MKI67	-0.149586	6.21183	-1.98898	0.0624711	0.550225
10850087	Adra1d	adrenoceptor alpha 1D	-0.35594	5.30053	-1.98751	0.0626471	0.550225
10824732	Sprr1a	small proline-rich protein 1A	-0.530883	5.25217	-1.9874	0.0626598	0.550225
10905378	Sox10	SRY-box transcription factor 10	0.210219	6.54861	1.98722	0.0626814	0.550225
10777468	Ablim2	actin binding LIM protein family, member 2	-0.146842	7.93653	-1.98713	0.0626919	0.550225
10838881	Tyro3	TYRO3 protein tyrosine kinase	-0.26712	8.06454	-1.98691	0.062719	0.550225
10887390	Zfyve21	zinc finger FYVE-type containing 21	-0.138046	4.06066	-1.98683	0.0627278	0.550225
10849018	Lcmt2	leucine carboxyl methyltransferase 2	-0.140763	4.14285	-1.98659	0.0627569	0.550225
10919118	Snap91	synaptosome associated protein 91	-0.178288	9.6992	-1.9862	0.0628041	0.550225
10921680	Cnpy3	canopy FGF signaling regulator 3	-0.137234	7.04245	-1.98612	0.0628129	0.550225
10757223	Ap4m1	adaptor related protein complex 4 subunit mu 1	-0.125448	4.93313	-1.98564	0.0628713	0.550225
10814894	Acad9	acyl-CoA dehydrogenase family, member 9	-0.126258	5.78315	-1.98515	0.0629294	0.550225
10856928	Add2	adducin 2	-0.137089	8.4396	-1.98487	0.0629634	0.550225
10940150	Pnck	pregnancy up-regulated nonubiquitous CaM kinase	-0.255112	7.15278	-1.98453	0.0630041	0.550225
10831197	G4	G4 protein	-0.105101	4.95929	-1.98449	0.063009	0.550225
10803276	Zfp521	zinc finger protein 521	0.579904	4.91559	1.98391	0.0630793	0.550225
10719524	Apoc1	apolipoprotein C1	0.220045	4.65107	1.98325	0.0631587	0.550225
10849556	Trpm7	transient receptor potential cation channel, subfamily M, member 7	0.137636	6.18552	1.98288	0.0632024	0.550225
10902957	Pip4k2c	phosphatidylinositol-5-phosphate 4-kinase type 2 gamma	-0.428734	7.51033	-1.98286	0.0632054	0.550225
10712763	Doc2g	double C2-like domains, gamma	-0.312812	4.72358	-1.9822	0.0632852	0.550225
10870481	Plpp3	phospholipid phosphatase 3	0.14182	9.31913	1.98179	0.0633349	0.550225
10720161	Timm50	translocase of inner mitochondrial membrane 50	-0.103312	6.10682	-1.98141	0.0633799	0.550225
10875023	Prex2	phosphatidylinositol-3,4,5-trisphosphate-dependent Rac exchange factor 2	0.100502	8.74097	1.98113	0.0634143	0.550225
10738673	Hexim2	HEXIM P-TEFb complex subunit 2	-0.135578	4.74325	-1.98074	0.0634621	0.550225
10903538	Rspo2	R-spondin 2	-0.741671	6.31941	-1.98052	0.0634881	0.550225
10904334	Trappc9	trafficking protein particle complex subunit 9	-0.141348	6.72226	-1.9803	0.0635145	0.550225
10832869	Hnrnph3	heterogeneous nuclear ribonucleoprotein H3	0.191438	7.38516	1.9795	0.0636123	0.550225
10794345	Susd3	sushi domain containing 3	-0.13379	4.88548	-1.97852	0.0637305	0.550225
10865740	Ndufa9	NADH:ubiquinone oxidoreductase subunit A9	-0.109137	8.12506	-1.97763	0.063839	0.550225
10912525	Stag1	stromal antigen 1	0.120034	5.63374	1.9769	0.0639274	0.550225
10761526	Aacs	acetoacetyl-CoA synthetase	-0.209557	5.94604	-1.97656	0.0639699	0.550225
10831208	Abhd16a	abhydrolase domain containing 16A, phospholipase	-0.219292	6.94413	-1.97598	0.0640397	0.550225
10850714	Nanp	N-acetylneuraminic acid phosphatase	-0.163638	5.06556	-1.97578	0.0640649	0.550225
10874298	Acot7	acyl-CoA thioesterase 7	-0.164853	7.55598	-1.9745	0.0642214	0.550225
10909987	Exph5	exophilin 5	-0.668025	5.95768	-1.97424	0.0642523	0.550225
10740416	Clec16a	C-type lectin domain containing 16A	-0.135219	6.70356	-1.97424	0.0642531	0.550225
10718089	Prr18	proline rich 18	0.236317	6.02491	1.97382	0.0643036	0.550225
10727122	Osbpl5	oxysterol binding protein-like 5	-0.158103	4.82072	-1.97366	0.0643239	0.550225
10808296	Mlycd	malonyl-CoA decarboxylase	-0.0955384	4.23935	-1.97349	0.0643443	0.550225
10859859	Rbm33	RNA binding motif protein 33	0.174094	5.92754	1.97348	0.0643454	0.550225
10728960	Stx3	syntaxin 3	-0.175832	5.20355	-1.97328	0.0643708	0.550225
10909091	Siae	sialic acid acetylesterase	-0.195079	5.56926	-1.9732	0.0643803	0.550225
10936856	Tspan7	tetraspanin 7	-0.085133	11.7316	-1.97297	0.0644086	0.550225
10748601	Abca8a	ATP-binding cassette, subfamily A (ABC1), member 8a	0.300735	5.30609	1.97276	0.0644339	0.550225
10916709	Abcg4	ATP binding cassette subfamily G member 4	-0.20723	7.86057	-1.97191	0.0645383	0.550225
10831168	Bag6	BAG cochaperone 6	-0.128632	8.17887	-1.97072	0.0646848	0.550225
10760842	Mir93	microRNA 93	0.0852369	4.39355	1.97063	0.0646965	0.550225
10935873	F8a1	coagulation factor VIII-associated 1	-0.148267	5.04837	-1.96994	0.0647805	0.550225
10756638	Tecpr1	tectonin beta-propeller repeat containing 1	-0.205853	6.82999	-1.96984	0.0647932	0.550225
10734270	Specc1	sperm antigen with calponin homology and coiled-coil domains 1	0.121751	6.81728	1.96977	0.0648022	0.550225
10728676	Dagla	diacylglycerol lipase, alpha	-0.261117	7.37728	-1.96885	0.064915	0.550225
10733690	Gm2a	GM2 ganglioside activator	0.102733	8.70939	1.96853	0.0649551	0.550225
10803494	Zfp24	zinc finger protein 24	0.105252	5.65779	1.96845	0.0649645	0.550225
10726118	LOC103691238	zinc finger protein 239-like	0.118738	5.37938	1.9683	0.0649835	0.550225
10830646	Atg5	autophagy related 5	0.119373	5.81378	1.96752	0.0650806	0.550225
10771732	Cdkl2	cyclin dependent kinase like 2	-0.216155	7.06681	-1.96729	0.065109	0.550225
10794752	Lyrm4	LYR motif containing 4	-0.168015	7.00219	-1.96601	0.0652673	0.550225
10850208	Pak5	p21 (RAC1) activated kinase 5	-0.368103	6.93041	-1.96584	0.0652886	0.550225
10748363	Smurf2	SMAD specific E3 ubiquitin protein ligase 2	0.119847	6.66686	1.96578	0.0652959	0.550225
10908008	Mtmr2	myotubularin related protein 2	0.114815	7.57469	1.96575	0.0653	0.550225
10900331	Map2k2	mitogen activated protein kinase kinase 2	-0.105568	7.17158	-1.96571	0.0653046	0.550225
10900186	Tle5	TLE family member 5, transcriptional modulator	-0.109228	10.5873	-1.96527	0.0653589	0.550225
10733321	Clk4	CDC-like kinase 4	0.166599	6.42237	1.96511	0.0653791	0.550225
10767781	Ppfia4	PTPRF interacting protein alpha 4	0.25071	5.2746	1.96484	0.0654121	0.550225
10871975	Mrps15	mitochondrial ribosomal protein S15	-0.106012	6.85582	-1.96483	0.0654138	0.550225
10713581	Chrm1	cholinergic receptor, muscarinic 1	-0.22702	8.85847	-1.96474	0.0654255	0.550225
10810551	Slc25a36	solute carrier family 25 member 36	0.0868953	7.7269	1.96399	0.0655182	0.550225
10903676	Trps1	transcriptional repressor GATA binding 1	0.23147	7.3523	1.96397	0.0655207	0.550225
10813839	Cdh10	cadherin 10	-0.175616	8.22502	-1.96301	0.0656408	0.550225
10914537	Exosc7	exosome component 7	-0.141344	4.65674	-1.96283	0.0656633	0.550225
10819139	Tacr3	tachykinin receptor 3	-0.593926	6.62104	-1.96274	0.0656749	0.550225
10828614	Uhrf1bp1	UHRF1 binding protein 1	-0.113781	4.62693	-1.96261	0.0656909	0.550225
10907634	Atp5mc2	ATP synthase membrane subunit c locus 2	-0.11269	8.59596	-1.96144	0.0658364	0.550225
10859636	Rassf8	Ras association domain family member 8	0.171726	4.49862	1.96106	0.0658844	0.550225
10889093	Efr3b	EFR3 homolog B	-0.16795	7.80753	-1.96084	0.065912	0.550225
10753348	Hmgn1	high mobility group nucleosome binding domain 1	0.158354	6.50657	1.96069	0.065931	0.550225
10752386	Ess2	ess-2 splicing factor homolog	-0.182711	6.84306	-1.9606	0.0659417	0.550225
10872972	Id3	inhibitor of DNA binding 3, HLH protein	-0.198628	5.44944	-1.95951	0.066079	0.550225
10932422	Rbm3	RNA binding motif protein 3	-0.175144	7.54185	-1.95915	0.0661237	0.550225
10866283	Ybx3	Y box binding protein 3	0.163675	7.1663	1.95892	0.0661524	0.550225
10825575	Olfml3	olfactomedin-like 3	0.320451	4.04254	1.95873	0.0661766	0.550225
10789727	Zcchc24	zinc finger CCHC-type containing 24	0.15837	8.13125	1.9583	0.0662307	0.550225
10789442	Gas6	growth arrest specific 6	-0.144818	8.29996	-1.95821	0.0662416	0.550225
10759416	Gtpbp6	GTP binding protein 6 (putative)	-0.179946	5.73026	-1.95817	0.0662466	0.550225
10729970	Rbp4	retinol binding protein 4	0.173254	5.26923	1.95722	0.0663663	0.550225
10705192	Dmac2	distal membrane arm assembly component 2	-0.183751	6.29461	-1.95707	0.0663852	0.550225
10836354	Tanc1	tetratricopeptide repeat, ankyrin repeat and coiled-coil containing 1	0.215715	4.72585	1.95707	0.0663858	0.550225
10795077	Nrsn1	neurensin 1	-0.206864	10.0397	-1.95682	0.0664173	0.550225
10767247	Nckap5	NCK-associated protein 5	-0.150271	4.94882	-1.95664	0.0664397	0.550225
10717935	Sod2	superoxide dismutase 2	0.113891	8.71273	1.95643	0.0664657	0.550225
10715984	Sfr1	SWI5-dependent homologous recombination repair protein 1	0.109121	5.50044	1.95612	0.0665056	0.550225
10772791	LOC498368	similar to RIKEN cDNA 0610040J01	-0.137168	4.64955	-1.95484	0.0666668	0.550653
10798764	B3galnt2	beta-1,3-N-acetylgalactosaminyltransferase 2	0.15626	4.8305	1.95471	0.066683	0.550653
10901996	Socs2	suppressor of cytokine signaling 2	-0.412482	5.99037	-1.95435	0.066729	0.550653
10878754	Cyp4x1	cytochrome P450, family 4, subfamily x, polypeptide 1	-0.207425	6.01659	-1.95354	0.0668314	0.550653
10770996	Atp5me	ATP synthase membrane subunit e	0.139206	7.20622	1.9535	0.0668365	0.550653
10875210	Oprk1	opioid receptor, kappa 1	0.721503	4.49257	1.95312	0.0668856	0.550653
10885788	Dcaf4	DDB1 and CUL4 associated factor 4	-0.141504	6.46767	-1.9531	0.0668872	0.550653
10762009	Anapc7	anaphase promoting complex subunit 7	-0.14647	6.26299	-1.95178	0.0670554	0.551027
10904031	Asap1	ArfGAP with SH3 domain, ankyrin repeat and PH domain 1	-0.306236	8.85637	-1.95172	0.0670631	0.551027
10909892	Cryab	crystallin, alpha B	0.233972	6.69724	1.95163	0.0670742	0.551027
10843793	Notch1	notch receptor 1	0.114773	6.03566	1.94787	0.0675536	0.554576
10800632	Sap130	Sin3A associated protein 130	-0.0917431	7.47109	-1.94706	0.0676577	0.554741
10919590	Ephb1	Eph receptor B1	0.129422	6.09496	1.94564	0.0678403	0.554741
10806601	MAST1	microtubule associated serine/threonine kinase 1	-0.220177	7.00063	-1.94555	0.0678513	0.554741
10739497	Tmem104	transmembrane protein 104	-0.161541	6.01742	-1.94549	0.0678596	0.554741
10711234	Bckdk	branched chain ketoacid dehydrogenase kinase	-0.168033	6.89107	-1.94487	0.0679393	0.554741
10716320	Trub1	TruB pseudouridine synthase family member 1	-0.114555	5.92293	-1.94478	0.0679504	0.554741
10773862	Ascc2	activating signal cointegrator 1 complex subunit 2	-0.107993	5.286	-1.94464	0.0679692	0.554741
10705126	Tmem145	transmembrane protein 145	-0.332083	7.27397	-1.9441	0.068038	0.554741
10799158	Dip2c	disco-interacting protein 2 homolog C	0.114698	6.52441	1.94394	0.068059	0.554741
10862061	Dennd2a	DENN domain containing 2A	0.125397	4.23996	1.94369	0.0680913	0.554741
10728578	Asrgl1	asparaginase and isoaspartyl peptidase 1	-0.131542	7.85373	-1.94365	0.0680961	0.554741
10777337	Stx18	syntaxin 18	-0.160508	6.50828	-1.94261	0.0682312	0.555454
10924576	Asic4	acid sensing ion channel subunit family member 4	0.474216	4.86474	1.94166	0.0683532	0.55555
10749630	Nploc4	NPL4 homolog, ubiquitin recognition factor	-0.107683	7.6618	-1.94136	0.0683923	0.55555
10742388	Sqstm1	sequestosome 1	-0.0756038	8.8741	-1.94126	0.0684048	0.55555
10735974	Pitpna	phosphatidylinositol transfer protein, alpha	-0.157979	9.89294	-1.94069	0.0684793	0.55555
10847955	Qser1	glutamine and serine rich 1	0.168831	6.61007	1.94068	0.0684807	0.55555
10835139	Tbc1d13	TBC1 domain family, member 13	-0.134276	5.62855	-1.9402	0.0685422	0.555663
10839751	Polr1b	RNA polymerase I subunit B	-0.133086	4.97486	-1.9394	0.0686463	0.555767
10919960	Tex264	testis expressed 264	-0.206563	6.73025	-1.93937	0.0686503	0.555767
10744830	Rap1gap2	RAP1 GTPase activating protein 2	-0.295512	7.60439	-1.93781	0.0688533	0.556647
10721796	Lin7b	lin-7 homolog B, crumbs cell polarity complex component	-0.200196	8.09788	-1.93771	0.0688656	0.556647
10908072	Gpr83	G protein-coupled receptor 83	-0.298012	5.91191	-1.93702	0.0689558	0.556647
10906546	Nell2	neural EGFL like 2	-0.221005	10.2185	-1.93671	0.0689971	0.556647
10742813	Atox1	antioxidant 1 copper chaperone	-0.207	6.67205	-1.93541	0.0691659	0.557623
10751018	Abhd10	abhydrolase domain containing 10, depalmitoylase	0.223549	5.10516	1.93422	0.0693215	0.557999
10787281	Mrpl34	mitochondrial ribosomal protein L34	-0.0980012	7.32134	-1.9334	0.0694294	0.557999
10782469	Rarb	retinoic acid receptor, beta	0.699918	5.11707	1.9331	0.0694686	0.557999
10924588	Tmem198	transmembrane protein 198	-0.163388	5.88569	-1.93176	0.0696448	0.557999
10909065	Msantd2	Myb/SANT DNA binding domain containing 2	0.140948	4.6467	1.93109	0.0697335	0.557999
10755875	Fgd4	FYVE, RhoGEF and PH domain containing 4	0.177898	6.03656	1.93104	0.0697393	0.557999
10817260	Celf3	CUGBP, Elav-like family member 3	-0.178557	8.6665	-1.9309	0.0697584	0.557999
10840613	Syndig1	synapse differentiation inducing 1	-0.195336	5.67541	-1.93068	0.0697875	0.557999
10880913	Mrto4	MRT4 homolog, ribosome maturation factor	-0.164509	6.35352	-1.93015	0.0698573	0.557999
10813578	Nadk2	NAD kinase 2, mitochondrial	0.109401	6.93401	1.93002	0.0698745	0.557999
10708439	Mesd	mesoderm development LRP chaperone	0.13412	6.03926	1.92958	0.0699322	0.557999
10868855	Anp32b	acidic nuclear phosphoprotein 32 family member B	0.157025	7.55583	1.92921	0.0699815	0.557999
10840565	Sstr4	somatostatin receptor 4	-0.24615	6.22935	-1.92912	0.0699926	0.557999
10819562	Lmo4	LIM domain only 4	-0.279309	9.35476	-1.92884	0.0700296	0.557999
10707151	Tmem86a	transmembrane protein 86A	-0.173313	4.59002	-1.9286	0.0700622	0.557999
10736647	Zfp207	zinc finger protein 207	0.0972586	8.73165	1.92815	0.0701208	0.557999
10769204	Klhl20	kelch-like family member 20	-0.163597	6.43453	-1.92807	0.0701318	0.557999
10940512	Sh2b1	SH2B adaptor protein 1	-0.10704	5.98305	-1.92791	0.070153	0.557999
10727260	Ccnd1	cyclin D1	-0.166813	5.68716	-1.92768	0.0701838	0.557999
10853683	Tac1	tachykinin, precursor 1	0.924213	5.2163	1.92741	0.0702193	0.557999
10858165	Cxcl12	C-X-C motif chemokine ligand 12	-0.205084	7.65728	-1.92674	0.0703078	0.557999
10774375	Peli1	pellino E3 ubiquitin protein ligase 1	0.215305	7.19823	1.92642	0.0703507	0.557999
10747633	Vat1	vesicle amine transport 1	0.231355	6.35763	1.92636	0.0703589	0.557999
10824914	Psmd4	proteasome 26S subunit ubiquitin receptor, non-ATPase 4	-0.109931	6.90381	-1.92553	0.0704686	0.55849
10752441	Lrrc74b	leucine rich repeat containing 74B	0.449149	4.09761	1.92407	0.0706637	0.55925
10784904	R3hcc1	R3H domain and coiled-coil containing 1	-0.161652	5.73054	-1.92261	0.0708577	0.55925
10754510	Mylk	myosin light chain kinase	0.239509	4.80195	1.92243	0.0708825	0.55925
10729629	RGD1311595	similar to KIAA2026 protein	0.128749	7.79889	1.92188	0.0709555	0.55925
10908810	Zbtb44	zinc finger and BTB domain containing 44	-0.192377	5.28297	-1.92123	0.0710429	0.55925
10746469	Pdk2	pyruvate dehydrogenase kinase 2	-0.139245	8.34784	-1.92037	0.0711572	0.55925
10930914	Micos13	mitochondrial contact site and cristae organizing system subunit 13	-0.0998908	7.81116	-1.92025	0.0711745	0.55925
10905500	Cbx6	chromobox 6	-0.166067	7.8271	-1.91999	0.0712084	0.55925
10820362	Msh3	mutS homolog 3	0.0959514	4.56797	1.91873	0.0713777	0.55925
10900195	Dohh	deoxyhypusine hydroxylase	-0.179496	5.97782	-1.91827	0.0714403	0.55925
10935890	Bgn	biglycan	0.472126	7.14491	1.91827	0.0714403	0.55925
10804125	Spry4	sprouty RTK signaling antagonist 4	-0.100769	4.37081	-1.91789	0.0714903	0.55925
10931651	Tbc1d16	TBC1 domain family, member 16	0.339336	5.91263	1.91733	0.0715667	0.55925
10812331	Faim	Fas apoptotic inhibitory molecule	0.177201	5.65742	1.91671	0.0716507	0.55925
10897683	Ddx17	DEAD-box helicase 17	0.185159	8.13144	1.91658	0.071668	0.55925
10785063	Bmp1	bone morphogenetic protein 1	-0.161135	5.04519	-1.91627	0.0717097	0.55925
10891880	Prima1	proline rich membrane anchor 1	0.323582	4.28818	1.91604	0.0717405	0.55925
10874258	Plekhg5	pleckstrin homology and RhoGEF domain containing G5	-0.417717	5.58252	-1.91568	0.0717891	0.55925
10727740	Klc2	kinesin light chain 2	-0.29798	9.19017	-1.91538	0.0718292	0.55925
10792680	Dlgap2	DLG associated protein 2	-0.220681	6.79369	-1.91536	0.0718322	0.55925
10931620	Grk3	G protein-coupled receptor kinase 3	-0.180325	6.3519	-1.91417	0.0719941	0.55925
10767951	Shisa4	shisa family member 4	-0.190468	8.73188	-1.91413	0.0719991	0.55925
10772306	Usp46	ubiquitin specific peptidase 46	-0.121635	8.16887	-1.91363	0.0720663	0.55925
10878938	Plk3	polo-like kinase 3	-0.228848	5.30991	-1.9133	0.0721119	0.55925
10787977	Galntl6	polypeptide N-acetylgalactosaminyltransferase-like 6	-0.261269	6.2439	-1.91297	0.0721566	0.55925
10904418	Slc45a4	solute carrier family 45, member 4	-0.22667	6.42966	-1.91291	0.0721642	0.55925
10886109	Gpatch2l	G patch domain containing 2-like	-0.140524	6.15702	-1.91268	0.072195	0.55925
10731738	Cdip1	cell death-inducing p53 target 1	-0.206011	6.99268	-1.9124	0.0722338	0.55925
10723114	Furin	furin (paired basic amino acid cleaving enzyme)	-0.127254	6.2619	-1.91233	0.0722433	0.55925
10755822	Top3b	DNA topoisomerase III beta	-0.0960198	6.56016	-1.91144	0.072364	0.55925
10735615	Camkk1	calcium/calmodulin-dependent protein kinase kinase 1	-0.401709	6.38703	-1.91108	0.0724131	0.55925
10833588	Marcks	myristoylated alanine rich protein kinase C substrate	0.149003	7.76419	1.91097	0.0724288	0.55925
10744098	Atp1b2	ATPase Na+/K+ transporting subunit beta 2	0.138422	10.06	1.91073	0.072461	0.55925
10858185	Hnrnpf	heterogeneous nuclear ribonucleoprotein F	0.120471	5.50041	1.90967	0.0726062	0.55925
10760403	Daglb	diacylglycerol lipase, beta	-0.251073	5.72549	-1.90929	0.0726571	0.55925
10735949	Scarf1	scavenger receptor class F, member 1	-0.139467	4.06134	-1.90909	0.0726854	0.55925
10742983	Rnf187	ring finger protein 187	-0.108358	9.70755	-1.90904	0.0726912	0.55925
10891681	Gpr68	G protein-coupled receptor 68	-0.157026	4.19081	-1.90894	0.072705	0.55925
10794143	Gprin1	G protein-regulated inducer of neurite outgrowth 1	-0.175954	7.47043	-1.90825	0.0727997	0.55925
10765413	Rxrg	retinoid X receptor gamma	0.637971	5.5465	1.90814	0.0728144	0.55925
10929634	Ecel1	endothelin converting enzyme-like 1	1.04479	5.28961	1.90785	0.0728541	0.55925
10919214	Syncrip	synaptotagmin binding, cytoplasmic RNA interacting protein	0.0872814	7.1194	1.90779	0.0728624	0.55925
10797722	Id4	inhibitor of DNA binding 4, HLH protein	0.256549	6.35178	1.90619	0.0730815	0.559415
10905371	RGD1359634	similar to RIKEN cDNA 1700088E04	-0.154045	6.14004	-1.906	0.0731081	0.559415
10747716	Mpp2	membrane palmitoylated protein 2	-0.157772	7.68259	-1.90591	0.0731201	0.559415
10792943	Naxd	NAD(P)HX dehydratase	-0.139925	4.70249	-1.90563	0.0731591	0.559415
10915341	Fbxl12	F-box and leucine-rich repeat protein 12	-0.102508	4.02238	-1.90563	0.0731591	0.559415
10803676	Rps27a	ribosomal protein S27a	0.103687	7.88782	1.90431	0.0733403	0.559415
10940673	Fubp1	far upstream element binding protein 1	0.0944994	7.04508	1.90382	0.0734086	0.559415
10878642	Prpf38a	pre-mRNA processing factor 38A	0.0951527	4.93497	1.9036	0.0734379	0.559415
10862464	Gsdme	gasdermin E	-0.142811	5.76564	-1.9034	0.0734663	0.559415
10791786	Fat1	FAT atypical cadherin 1	0.233836	7.16096	1.90332	0.0734767	0.559415
10800189	Cables1	Cdk5 and Abl enzyme substrate 1	-0.154345	5.44261	-1.90189	0.0736747	0.559415
10789534	Tubgcp3	tubulin, gamma complex associated protein 3	-0.0883054	6.94853	-1.90189	0.0736751	0.559415
10713857	Fads1	fatty acid desaturase 1	0.136043	9.12311	1.90172	0.0736978	0.559415
10778236	Pold2	DNA polymerase delta 2, accessory subunit	-0.148416	5.91133	-1.90135	0.0737492	0.559415
10876291	Tmsb4x	thymosin beta 4, X-linked	0.116802	7.97585	1.90022	0.0739054	0.559415
10893067	Stat2	signal transducer and activator of transcription 2	-0.173055	5.79416	-1.90018	0.0739108	0.559415
10727303	Ighmbp2	immunoglobulin mu DNA binding protein 2	-0.183508	5.4834	-1.89963	0.0739879	0.559415
10715146	Lgi1	leucine-rich, glioma inactivated 1	-0.20719	8.78175	-1.89924	0.0740418	0.559415
10830932	Trim26	tripartite motif-containing 26	-0.10678	4.53365	-1.89918	0.0740499	0.559415
10940559	Ptp4a2	protein tyrosine phosphatase 4A2	0.0791093	8.61087	1.89894	0.0740838	0.559415
10769301	Mettl13	methyltransferase 13, eEF1A lysine and N-terminal methyltransferase	-0.1316	5.25999	-1.89864	0.0741254	0.559415
10923768	Cyp20a1	cytochrome P450, family 20, subfamily a, polypeptide 1	0.179733	5.54307	1.89852	0.0741426	0.559415
10794534	Atxn1	ataxin 1	-0.123181	8.34921	-1.8985	0.0741454	0.559415
10874776	Acap3	ArfGAP with coiled-coil, ankyrin repeat and PH domains 3	-0.203341	6.80246	-1.89835	0.0741649	0.559415
10711139	Rnf40	ring finger protein 40	-0.105565	6.41463	-1.89832	0.0741695	0.559415
10745185	Sdf2	stromal cell derived factor 2	-0.121598	4.96573	-1.89826	0.0741776	0.559415
10769422	Prrx1	paired related homeobox 1	0.17389	6.3644	1.89826	0.0741782	0.559415
10909777	Nxpe1	neurexophilin and PC-esterase domain family, member 1	-0.189155	4.00719	-1.89792	0.0742248	0.559415
10811287	Cdyl2	chromodomain Y-like 2	-0.309009	6.20152	-1.89732	0.0743091	0.55969
10813117	Eif1	eukaryotic translation initiation factor 1	0.0841143	4.84159	1.8964	0.0744378	0.56005
10779423	Fezf2	Fez family zinc finger 2	-0.555588	8.32873	-1.89589	0.0745086	0.56005
10850878	Commd7	COMM domain containing 7	-0.099403	5.18485	-1.89571	0.0745338	0.56005
10833523	Lims1	LIM zinc finger domain containing 1	0.116768	7.05778	1.89538	0.0745793	0.56005
10871444	Slc6a9	solute carrier family 6 member 9	0.290698	8.39886	1.89483	0.0746572	0.56005
10741256	Eme2	essential meiotic structure-specific endonuclease subunit 2	-0.196576	6.76078	-1.89477	0.0746647	0.56005
10919328	Chst2	carbohydrate sulfotransferase 2	0.169901	8.74984	1.89404	0.0747677	0.56005
10860351	Hgf	hepatocyte growth factor	-0.33153	4.44171	-1.89389	0.0747879	0.56005
10922286	Dst	dystonin	0.0759795	8.0755	1.89378	0.0748032	0.56005
10749036	Recql5	RecQ like helicase 5	-0.102475	4.73815	-1.89289	0.074928	0.56005
10738724	Crhr1	corticotropin releasing hormone receptor 1	-0.30001	4.76596	-1.89262	0.0749665	0.56005
10817183	S100a11	S100 calcium binding protein A11	0.474429	5.88267	1.89211	0.0750383	0.56005
10914025	Osbpl10	oxysterol binding protein-like 10	-0.199587	6.82473	-1.89161	0.0751084	0.56005
10932726	Trpc5	transient receptor potential cation channel, subfamily C, member 5	-0.325888	6.19548	-1.89115	0.0751732	0.56005
10940557	Crym	crystallin, mu	-0.2555	7.45328	-1.89067	0.0752404	0.56005
10756853	Radil	Rap associating with DIL domain	-0.114631	4.72091	-1.8906	0.0752514	0.56005
10935076	Il1rapl2	interleukin 1 receptor accessory protein-like 2	-0.288671	4.9402	-1.8905	0.0752653	0.56005
10847375	RGD1309540	similar to hypothetical protein MGC40841; similar to hypothetical protein MGC4707	-0.113472	7.93297	-1.8901	0.0753208	0.56005
10751948	Masp1	MBL associated serine protease 1	-0.204716	5.79477	-1.88972	0.0753743	0.56005
10723884	Serpinh1	serpin family H member 1	0.184921	6.5222	1.88947	0.07541	0.56005
10838729	Rpusd2	RNA pseudouridine synthase domain containing 2	-0.188003	4.63544	-1.88923	0.0754442	0.56005
10856747	Nagk	N-acetylglucosamine kinase	-0.152816	5.75294	-1.88914	0.0754566	0.56005
10842130	Pigt	phosphatidylinositol glycan anchor biosynthesis, class T	-0.0907457	9.12195	-1.88911	0.0754611	0.56005
10897535	Nol12	nucleolar protein 12	-0.131774	4.96251	-1.88858	0.0755353	0.56005
10901328	Polr3b	RNA polymerase III subunit B	-0.116901	5.92539	-1.88844	0.0755555	0.56005
10791250	Lpl	lipoprotein lipase	0.71516	5.48528	1.88763	0.075671	0.560083
10857310	Lsm3	LSM3 homolog, U6 small nuclear RNA and mRNA degradation associated	0.104101	5.03123	1.8875	0.0756886	0.560083
10820335	Rasgrf2	RAS protein-specific guanine nucleotide-releasing factor 2	-0.456806	7.33297	-1.88697	0.0757635	0.560083
10895669	Tmbim4	transmembrane BAX inhibitor motif containing 4	-0.0814752	6.26767	-1.88684	0.0757824	0.560083
10920659	Crtapl1	cartilage associated protein-like 1	0.139489	4.83249	1.88659	0.0758178	0.560083
10803194	Esco1	establishment of sister chromatid cohesion N-acetyltransferase 1	0.0969766	5.90491	1.88637	0.0758496	0.560083
10731247	Myh11	myosin heavy chain 11	0.672842	5.14036	1.88604	0.0758955	0.560083
10898281	Nup50	nucleoporin 50	-0.148346	6.29555	-1.8841	0.0761717	0.560458
10722589	Tjp1	tight junction protein 1	0.0857447	8.86254	1.88396	0.0761921	0.560458
10788374	Mtus1	microtubule associated scaffold protein 1	0.151856	6.74843	1.88347	0.0762616	0.560458
10920322	P4htm	prolyl 4-hydroxylase, transmembrane	-0.1225	6.72188	-1.88345	0.076265	0.560458
10739302	Axin2	axin 2	-0.137251	5.95186	-1.88314	0.0763091	0.560458
10753172	Donson	DNA replication fork stabilization factor DONSON	0.118517	4.44382	1.88233	0.0764244	0.560458
10757940	Galnt17	polypeptide N-acetylgalactosaminyltransferase 17	-0.301601	6.94101	-1.8822	0.0764435	0.560458
10897524	Pdxp	pyridoxal phosphatase	-0.121944	7.87153	-1.88199	0.0764731	0.560458
10704974	Irgq	immunity-related GTPase Q	-0.167626	4.25471	-1.8815	0.0765426	0.560458
10728396	Mark2	microtubule affinity regulating kinase 2	-0.102915	8.4793	-1.88117	0.0765902	0.560458
10802579	Mex3c	mex-3 RNA binding family member C	0.0813397	7.11012	1.88073	0.0766532	0.560458
10781410	Gfra2	GDNF family receptor alpha 2	-0.411656	8.38463	-1.88017	0.0767333	0.560458
10705739	Yif1b	Yip1 interacting factor homolog B, membrane trafficking protein	-0.17005	6.3685	-1.87998	0.07676	0.560458
10920803	Plcd1	phospholipase C, delta 1	-0.169252	5.6318	-1.87993	0.0767683	0.560458
10829359	Slx9	SLX9 ribosome biogenesis factor	-0.128149	5.88522	-1.8799	0.0767723	0.560458
10794430	Ptpdc1	protein tyrosine phosphatase domain containing 1	0.165444	5.28266	1.87921	0.0768714	0.560458
10931844	Thoc2	THO complex 2	0.127202	6.41276	1.8786	0.0769591	0.560458
10770412	Enah	ENAH, actin regulator	0.188517	8.2537	1.87852	0.0769709	0.560458
10876601	Coro2a	coronin 2A	-0.13636	6.75083	-1.87842	0.0769845	0.560458
10787129	Cherp	calcium homeostasis endoplasmic reticulum protein	-0.142832	7.10806	-1.87839	0.0769892	0.560458
10845124	Rnd3	Rho family GTPase 3	0.323022	6.42158	1.8778	0.0770734	0.560458
10773827	Tbc1d10a	TBC1 domain family, member 10a	-0.129895	5.88899	-1.87688	0.0772064	0.560458
10868142	Gabrr2	gamma-aminobutyric acid type A receptor subunit rho 2	-0.394166	4.24602	-1.87686	0.0772095	0.560458
10815352	Trpc4	transient receptor potential cation channel, subfamily C, member 4	0.314154	6.20024	1.87667	0.0772364	0.560458
10851809	LOC685619	similar to TP53-regulating kinase (p53-related protein kinase) (Nori-2)	-0.159677	6.36472	-1.8762	0.077305	0.560458
10781690	Elf1	E74 like ETS transcription factor 1	0.137136	5.94833	1.87619	0.0773063	0.560458
10898654	Alg10	ALG10, alpha-1,2-glucosyltransferase	-0.0970429	5.55052	-1.87616	0.07731	0.560458
10720000	Ltbp4	latent transforming growth factor beta binding protein 4	-0.160078	5.33289	-1.87579	0.0773631	0.560458
10788035	Lonp1	lon peptidase 1, mitochondrial	-0.0790062	5.48097	-1.87539	0.0774209	0.560458
10708809	Rsf1	remodeling and spacing factor 1	0.124117	7.11668	1.87474	0.0775155	0.560458
10898029	Xrcc6	X-ray repair cross complementing 6	0.106209	6.06217	1.87466	0.0775268	0.560458
10867060	Tuba8	tubulin, alpha 8	-0.208335	4.73733	-1.87287	0.0777872	0.560458
10816886	Tpm3	tropomyosin 3	-0.109489	7.66297	-1.87188	0.0779302	0.560458
10797236	Grk6	G protein-coupled receptor kinase 6	-0.109046	6.05948	-1.87107	0.0780479	0.560458
10744182	Polr2a	RNA polymerase II subunit A	0.104732	7.11342	1.87096	0.0780646	0.560458
10805731	Tk2	thymidine kinase 2	-0.118053	5.13641	-1.87095	0.0780663	0.560458
10733643	Rapgef6	Rap guanine nucleotide exchange factor 6	0.345152	5.02716	1.87088	0.0780756	0.560458
10867081	Jph1	junctophilin 1	-0.23999	5.4741	-1.87048	0.0781345	0.560458
10882246	B3galt6	Beta-1,3-galactosyltransferase 6	-0.170579	4.93853	-1.86986	0.0782247	0.560458
10816500	Glmp	glycosylated lysosomal membrane protein	-0.0986191	6.23583	-1.86983	0.0782286	0.560458
10827370	Nexn	nexilin (F actin binding protein)	0.928064	4.12918	1.86972	0.0782455	0.560458
10889532	Cbll1	Cbl proto-oncogene like 1	-0.110195	7.65855	-1.86959	0.0782643	0.560458
10726439	Tcerg1l	transcription elongation regulator 1-like	-0.288584	6.06709	-1.86955	0.0782697	0.560458
10732076	Pgp	phosphoglycolate phosphatase	-0.151754	6.71396	-1.86911	0.0783336	0.560458
10910270	Sin3a	SIN3 transcription regulator family member A	0.111373	6.28992	1.86861	0.0784065	0.560458
10784517	Msra	methionine sulfoxide reductase A	-0.211744	7.3464	-1.86845	0.0784299	0.560458
10866926	Ints13	integrator complex subunit 13	0.119892	6.55236	1.86814	0.0784758	0.560458
10796835	Mrpl36	mitochondrial ribosomal protein L36	-0.21507	5.35651	-1.86808	0.0784847	0.560458
10832640	Gnaz	G protein subunit alpha z	-0.16047	7.2195	-1.86778	0.0785277	0.560458
10889568	Dus4l	dihydrouridine synthase 4-like	-0.184651	4.73281	-1.86764	0.0785495	0.560458
10894361	Zfp414	zinc finger protein 414	-0.150662	5.56873	-1.86693	0.078653	0.560458
10803774	Brd8	bromodomain containing 8	-0.0824501	6.17337	-1.86692	0.0786544	0.560458
10888819	Zfp512	zinc finger protein 512	-0.123374	6.09679	-1.86675	0.0786793	0.560458
10850934	Necab3	N-terminal EF-hand calcium binding protein 3	-0.457578	5.60608	-1.86622	0.0787572	0.560458
10782124	Timm8a2	translocase of inner mitochondrial membrane 8A2	0.0843582	4.20185	1.86611	0.0787727	0.560458
10710936	Doc2a	double C2 domain alpha	-0.45004	6.97466	-1.86608	0.078777	0.560458
10795989	Pfkp	phosphofructokinase, platelet	-0.165669	9.51179	-1.86566	0.078839	0.560558
10820126	Nr2f1	nuclear receptor subfamily 2, group F, member 1	-0.432852	5.6035	-1.86533	0.0788875	0.560562
10777311	Drd5	dopamine receptor D5	0.336398	4.62533	1.86471	0.0789784	0.560721
10704808	Ercc1	ERCC excision repair 1, endonuclease non-catalytic subunit	-0.196684	6.33719	-1.86317	0.0792054	0.560721
10840102	Shld1	shieldin complex subunit 1	-0.143553	5.5507	-1.863	0.0792313	0.560721
10815317	Foxo1	forkhead box O1	0.439555	6.51755	1.8628	0.0792606	0.560721
10844827	Dennd1a	DENN domain containing 1A	-0.10371	7.40624	-1.86256	0.0792955	0.560721
10728269	Gpr137	G protein-coupled receptor 137	-0.124509	8.43293	-1.86214	0.0793573	0.560721
10783759	Zfhx2	zinc finger homeobox 2	0.137265	5.68693	1.8621	0.0793635	0.560721
10724785	Nrip3	nuclear receptor interacting protein 3	-0.269103	7.85891	-1.86191	0.079392	0.560721
10869530	Trim32	tripartite motif-containing 32	0.157386	5.98353	1.86176	0.0794143	0.560721
10889789	Prkd1	protein kinase D1	0.175768	5.41603	1.86091	0.0795389	0.560721
10930582	ND3	NADH dehydrogenase subunit 3	0.0795654	11.5666	1.86046	0.0796064	0.560721
10883386	Dnajc27	DnaJ heat shock protein family (Hsp40) member C27	-0.0938445	7.1707	-1.86044	0.0796085	0.560721
10906934	Fkbp11	FKBP prolyl isomerase 11	-0.115216	4.40107	-1.86002	0.079671	0.560721
10749226	Exoc7	exocyst complex component 7	-0.119508	6.39313	-1.85888	0.0798411	0.560721
10795404	Pou6f2	POU class 6 homeobox 2	-0.164786	4.73212	-1.85874	0.0798607	0.560721
10797728	Rnf144b	ring finger protein 144B	-0.22447	5.78727	-1.85874	0.0798612	0.560721
10803505	LOC498829	Ab2-143	0.138119	4.52943	1.85822	0.0799378	0.560721
10826771	Gar1	GAR1 ribonucleoprotein	-0.110828	4.27823	-1.85799	0.0799733	0.560721
10905655	Polr3h	RNA polymerase III subunit H	-0.114428	5.17016	-1.85668	0.0801671	0.560721
10758802	Rita1	RBPJ interacting and tubulin associated 1	-0.175828	5.24503	-1.8566	0.08018	0.560721
10882221	Tmem88b	transmembrane protein 88B	0.271019	6.65559	1.85628	0.0802273	0.560721
10876103	Ubap2	ubiquitin-associated protein 2	-0.136882	8.30055	-1.85609	0.0802552	0.560721
10873928	Fbxo2	F-box protein 2	-0.149762	6.45628	-1.85572	0.0803116	0.560721
10929458	Sphkap	SPHK1 interactor, AKAP domain containing	-0.163953	7.14577	-1.85539	0.0803609	0.560721
10802567	Mbd2	methyl-CpG binding domain protein 2	0.119642	8.25276	1.85516	0.080395	0.560721
10759177	Tmem119	transmembrane protein 119	-0.139819	5.82548	-1.85487	0.0804375	0.560721
10708921	Map6	microtubule-associated protein 6	-0.148566	7.5227	-1.85467	0.080468	0.560721
10769131	Cacybp	calcyclin binding protein	0.135814	8.67046	1.8541	0.0805524	0.560721
10787266	Babam1	BRISC and BRCA1 A complex member 1	-0.189974	7.98434	-1.85384	0.080592	0.560721
10752831	Cyyr1	cysteine and tyrosine rich 1	-0.196302	6.4402	-1.85345	0.0806505	0.560721
10818155	Inka2	inka box actin regulator 2	-0.412867	7.23419	-1.85297	0.0807218	0.560721
10857610	Bhlhe40	basic helix-loop-helix family, member e40	-0.372215	8.64888	-1.85294	0.0807265	0.560721
10763531	Tfcp2l1	transcription factor CP2-like 1	-0.232983	4.7909	-1.85294	0.0807266	0.560721
10812162	Erap1	endoplasmic reticulum aminopeptidase 1	0.168452	5.64488	1.85271	0.0807621	0.560721
10806147	Rasd2	RASD family, member 2	0.369972	7.42537	1.85226	0.0808286	0.560721
10829244	Pwp2	PWP2, small subunit processome component	-0.122499	5.40405	-1.8519	0.0808826	0.560721
10816801	Pygo2	pygopus family PHD finger 2	-0.113421	5.99682	-1.85132	0.0809698	0.560721
10734395	Elac2	elaC ribonuclease Z 2	-0.0953503	5.31135	-1.85108	0.0810056	0.560721
10770328	Stum	stum, mechanosensory transduction mediator homolog	-0.28691	8.20872	-1.85097	0.0810225	0.560721
10759513	Cers4	ceramide synthase 4	-0.0999715	7.16561	-1.85097	0.0810227	0.560721
10718408	LOC102555644	zinc finger protein 182-like	0.171504	4.39898	1.85052	0.0810903	0.560721
10831152	Atp6v1g2	ATPase H+ transporting V1 subunit G2	-0.126884	10.2536	-1.85034	0.0811178	0.560721
10707137	Ldha	lactate dehydrogenase A	-0.16716	9.3192	-1.84942	0.0812568	0.560725
10772556	Gnpda2	glucosamine-6-phosphate deaminase 2	0.164812	4.39903	1.84871	0.0813628	0.560725
10862756	Lancl2	LanC like 2	-0.198188	7.34636	-1.84816	0.0814466	0.560725
10936655	Chst7	carbohydrate sulfotransferase 7	0.141063	4.25444	1.84809	0.0814577	0.560725
10840332	Pcsk2	proprotein convertase subtilisin/kexin type 2	-0.220635	9.27528	-1.84797	0.0814746	0.560725
10707121	Gtf2h1	general transcription factor IIH subunit 1	-0.117459	6.3964	-1.84794	0.0814796	0.560725
10804750	Ablim3	actin binding LIM protein family, member 3	-0.225545	6.94572	-1.84717	0.0815968	0.560725
10736397	Rab11fip4	RAB11 family interacting protein 4	-0.105547	8.57093	-1.84665	0.0816754	0.560725
10887636	Tmem121	transmembrane protein 121	-0.131795	5.00604	-1.846	0.0817732	0.560725
10741647	Pigq	phosphatidylinositol glycan anchor biosynthesis, class Q	-0.1144	8.03399	-1.8459	0.0817894	0.560725
10721074	Gpatch1	G patch domain containing 1	-0.0825517	6.27119	-1.84587	0.0817929	0.560725
10936526	Uxt	ubiquitously-expressed, prefoldin-like chaperone	-0.138909	8.59915	-1.84524	0.0818896	0.560725
10884853	Prpf39	pre-mRNA processing factor 39	0.115603	6.53667	1.84452	0.0819986	0.560725
10832577	Adora2a	adenosine A2a receptor	1.0953	5.95298	1.84415	0.0820549	0.560725
10725114	Pik3c2a	phosphatidylinositol-4-phosphate 3-kinase, catalytic subunit type 2 alpha	0.192041	6.26946	1.84413	0.0820581	0.560725
10860226	Lrrc17	leucine rich repeat containing 17	-0.373336	4.17533	-1.8441	0.0820625	0.560725
10936086	Flna	filamin A	0.438392	4.95289	1.84305	0.0822217	0.560725
10709923	Usp47	ubiquitin specific peptidase 47	0.0994021	7.71029	1.84239	0.0823232	0.560725
10914209	Xylb	xylulokinase	-0.118844	4.79509	-1.84223	0.0823466	0.560725
10748077	Prp2l1	proline rich protein 2-like 1	0.227143	5.83964	1.84212	0.0823637	0.560725
10737426	Tmem100	transmembrane protein 100	0.167021	5.86354	1.84208	0.0823704	0.560725
10737021	Myo19	myosin XIX	0.128804	4.25428	1.84129	0.0824909	0.560725
10886806	Dlk1	delta like non-canonical Notch ligand 1	0.451328	4.38074	1.84123	0.0825003	0.560725
10850958	Pxmp4	peroxisomal membrane protein 4	-0.17662	5.48825	-1.8405	0.0826115	0.560725
10835604	Sh2d3c	SH2 domain containing 3C	-0.245643	7.22243	-1.84042	0.0826244	0.560725
10802712	RGD1562987	similar to cDNA sequence BC031181	0.142373	7.9631	1.84017	0.0826614	0.560725
10760502	Foxk1	forkhead box K1	-0.11385	7.29713	-1.84017	0.0826623	0.560725
10864732	Timp4	TIMP metallopeptidase inhibitor 4	0.252801	5.68947	1.84004	0.0826825	0.560725
10926245	Trem2	triggering receptor expressed on myeloid cells 2	-0.144792	4.94571	-1.83997	0.0826921	0.560725
10865502	Eno2	enolase 2	-0.0885516	10.6179	-1.83997	0.0826925	0.560725
10769501	Sft2d2	SFT2 domain containing 2	0.167597	4.06395	1.83995	0.0826965	0.560725
10740141	Hgs	hepatocyte growth factor-regulated tyrosine kinase substrate	-0.152996	6.35499	-1.83991	0.0827024	0.560725
10918292	Zfp609	zinc finger protein 609	0.113288	7.01123	1.83942	0.0827774	0.560908
10810378	Inpp4b	inositol polyphosphate-4-phosphatase type II B	0.227473	4.79037	1.8391	0.0828254	0.560908
10884698	LOC314140	ribose-phosphate pyrophosphokinase I -like	0.151308	6.39305	1.83863	0.0828988	0.56108
10825816	Cym	chymosin	-0.314192	4.27045	-1.83798	0.0829985	0.561125
10853382	Zfp804b	zinc finger protein 804B	-0.341784	4.09705	-1.83773	0.083037	0.561125
10777517	Adra2c	adrenoceptor alpha 2C	0.254382	5.98513	1.8373	0.0831019	0.561125
10732366	Tsr3	TSR3 ribosome maturation factor	-0.11486	5.89499	-1.83725	0.0831109	0.561125
10903387	Ncald	neurocalcin delta	-0.237157	9.09307	-1.83702	0.0831457	0.561125
10862867	Gadd45a	growth arrest and DNA-damage-inducible, alpha	0.165116	5.62713	1.83599	0.0833045	0.561373
10874126	Slc2a5	solute carrier family 2 member 5	-0.138003	4.21536	-1.83546	0.0833865	0.561373
10908645	Bmper	BMP-binding endothelial regulator	-0.339936	5.14994	-1.83489	0.0834737	0.561373
10773716	Selenom	selenoprotein M	-0.176515	7.98931	-1.83483	0.0834837	0.561373
10794136	Sncb	synuclein, beta	-0.188258	10.1246	-1.8346	0.0835188	0.561373
10844355	Cdk9	cyclin-dependent kinase 9	-0.117231	6.82934	-1.83408	0.0835986	0.561566
10832108	Btbd9	BTB domain containing 9	-0.123824	7.17773	-1.83379	0.0836437	0.561566
10804415	Sema6a	semaphorin 6A	0.124447	7.50574	1.83346	0.0836947	0.561586
10844215	Asb6	ankyrin repeat and SOCS box-containing 6	-0.156717	4.99202	-1.83252	0.083841	0.561787
10851056	Trpc4ap	transient receptor potential cation channel, subfamily C, member 4 associated protein	-0.105162	8.26917	-1.83223	0.0838861	0.561787
10902249	Nav3	neuron navigator 3	-0.26396	7.84665	-1.83222	0.083888	0.561787
10858282	Kdm5a	lysine demethylase 5A	0.130493	6.36745	1.83203	0.0839171	0.561787
10905128	Arhgap39	Rho GTPase activating protein 39	-0.197668	6.43104	-1.83154	0.0839928	0.561972
10883094	Ppm1g	protein phosphatase, Mg2+/Mn2+ dependent, 1G	-0.119768	6.91271	-1.8302	0.0842006	0.562752
10739099	Map3k3	mitogen activated protein kinase kinase kinase 3	0.0872465	5.33713	1.8286	0.0844508	0.562752
10835552	Golga2	golgin A2	-0.097822	6.79699	-1.8277	0.0845916	0.562752
10746515	Kat7	lysine acetyltransferase 7	-0.101757	7.68809	-1.8269	0.0847159	0.562752
10717459	Tppp	tubulin polymerization promoting protein	-0.144911	10.754	-1.82653	0.0847739	0.562752
10798457	Hist1h2ah	histone cluster 1 H2A family member H	0.180834	4.76687	1.82598	0.0848603	0.562752
10883125	Gtf3c2	general transcription factor IIIC subunit 2	-0.092292	6.32015	-1.82594	0.0848671	0.562752
10912917	Cacna2d2	calcium voltage-gated channel auxiliary subunit alpha2delta 2	0.559712	6.79419	1.82507	0.0850032	0.562752
10855615	Chn2	chimerin 2	0.364579	7.46757	1.82382	0.0851998	0.562752
10759026	Unc119b	unc-119 lipid binding chaperone B	0.141115	5.36073	1.82318	0.0853005	0.562752
10770680	Prox1	prospero homeobox 1	0.143856	4.96508	1.82304	0.0853219	0.562752
10740309	Nde1	nudE neurodevelopment protein 1	0.110718	4.18238	1.82289	0.0853459	0.562752
10919712	Ackr4	atypical chemokine receptor 4	0.264167	4.99736	1.82255	0.0853987	0.562752
10940578	Ache	acetylcholinesterase	0.402088	6.69764	1.82251	0.0854048	0.562752
10747592	Ezh1	enhancer of zeste 1 polycomb repressive complex 2 subunit	-0.137897	8.28254	-1.82177	0.0855226	0.562752
10724464	Cavin3	caveolae associated protein 3	-0.219025	6.71159	-1.81979	0.0858344	0.562752
10918580	Polr2m	RNA polymerase II subunit M	-0.0877917	8.02521	-1.81969	0.0858509	0.562752
10882071	Prxl2b	peroxiredoxin like 2B	-0.102358	4.04699	-1.81965	0.0858565	0.562752
10710179	Ccp110	centriolar coiled-coil protein 110	0.157522	6.22067	1.81924	0.0859227	0.562752
10892950	Naca	nascent polypeptide associated complex subunit alpha	0.124897	5.79897	1.81879	0.0859927	0.562752
10872467	Pef1	penta-EF hand domain containing 1	-0.13263	6.69921	-1.81872	0.0860037	0.562752
10812354	Mef2c	myocyte enhancer factor 2C	-0.310564	10.4123	-1.81872	0.0860048	0.562752
10940458	Mcl1	MCL1 apoptosis regulator, BCL2 family member	0.132919	7.77308	1.81866	0.086014	0.562752
10713825	Fth1	ferritin heavy chain 1	0.075728	10.8834	1.81824	0.0860811	0.562752
10707386	Rhoq	ras homolog family member Q	0.112762	6.04131	1.81803	0.0861141	0.562752
10786042	Tmtc4	transmembrane O-mannosyltransferase targeting cadherins 4	0.169859	4.9108	1.81797	0.086124	0.562752
10854272	Klhdc10	kelch domain containing 10	0.131804	7.23701	1.81743	0.0862097	0.562752
10937769	Ap1s2	adaptor related protein complex 1 subunit sigma 2	0.592449	7.24107	1.81654	0.0863501	0.562752
10878503	Acot11	acyl-CoA thioesterase 11	-0.103554	4.1487	-1.81648	0.0863598	0.562752
10939617	Zfp280c	zinc finger protein 280C	0.131404	6.08831	1.81605	0.0864293	0.562752
10821959	Tars1	threonyl-tRNA synthetase 1	-0.128596	5.94417	-1.81582	0.0864649	0.562752
10920956	Gorasp1	golgi reassembly stacking protein 1	-0.12421	6.07703	-1.81578	0.0864724	0.562752
10819052	Lef1	lymphoid enhancer binding factor 1	-0.15275	5.06163	-1.81558	0.0865038	0.562752
10726080	Vkorc1	vitamin K epoxide reductase complex, subunit 1	0.111425	7.11073	1.81533	0.0865429	0.562752
10862820	Snca	synuclein alpha	-0.203511	8.82135	-1.81463	0.0866551	0.562752
10940626	Sgce	sarcoglycan, epsilon	0.132259	7.63719	1.81461	0.086658	0.562752
10723383	Cemip	cell migration inducing hyaluronidase 1	-0.250231	4.51445	-1.81458	0.0866637	0.562752
10810286	Gipc1	GIPC PDZ domain containing family, member 1	-0.195107	7.12042	-1.81453	0.0866708	0.562752
10876172	Dctn3	dynactin subunit 3	-0.126351	6.0095	-1.81414	0.0867336	0.562752
10831808	Cuta	cutA divalent cation tolerance homolog	-0.117738	7.41643	-1.81409	0.0867416	0.562752
10824300	Slc25a44	solute carrier family 25, member 44	-0.139166	6.82945	-1.81387	0.0867773	0.562752
10912439	Rbp1	retinol binding protein 1	0.597935	5.82068	1.81384	0.0867821	0.562752
10818108	Rhoc	ras homolog family member C	0.144435	6.41109	1.81375	0.086796	0.562752
10715848	Sfxn2	sideroflexin 2	-0.129756	4.36389	-1.81338	0.0868549	0.562752
10787289	Gtpbp3	GTP binding protein 3	-0.153355	4.80993	-1.81311	0.0868985	0.562752
10889579	Hbp1	HMG-box transcription factor 1	0.124276	5.9513	1.81294	0.0869245	0.562752
10815636	Mbnl1	muscleblind-like splicing regulator 1	0.0990472	8.77777	1.81287	0.0869358	0.562752
10735135	Dlg4	discs large MAGUK scaffold protein 4	-0.113031	9.93229	-1.81277	0.0869531	0.562752
10912289	Slc9a9	solute carrier family 9 member A9	-0.227061	6.36696	-1.8127	0.0869629	0.562752
10803991	Cd14	CD14 molecule	-0.117297	4.03455	-1.81267	0.0869679	0.562752
10891659	Rps6ka5	ribosomal protein S6 kinase A5	0.336369	6.17959	1.81251	0.0869933	0.562752
10869195	Palm2	paralemmin 2	-0.199696	8.93987	-1.8123	0.0870283	0.562752
10850903	Cdk5rap1	CDK5 regulatory subunit associated protein 1	-0.157014	4.62644	-1.81216	0.0870504	0.562752
10847438	Dgkz	diacylglycerol kinase zeta	-0.272935	9.44659	-1.81125	0.0871969	0.562752
10712560	Dhcr7	7-dehydrocholesterol reductase	-0.127531	6.33833	-1.811	0.0872358	0.562752
10773559	Nelfa	negative elongation factor complex member A	-0.0801126	7.29605	-1.81051	0.0873157	0.562752
10737470	Spag9	sperm associated antigen 9	0.0719935	8.30711	1.8099	0.0874124	0.562752
10784334	Tnfrsf19	TNF receptor superfamily member 19	-0.12014	6.27439	-1.80961	0.0874593	0.562752
10931172	Zfp300	zinc finger protein 300	0.141038	4.13792	1.80945	0.0874856	0.562752
10706635	Nup62	nucleoporin 62	-0.105425	5.82375	-1.80932	0.0875065	0.562752
10812566	Wdr41	WD repeat domain 41	-0.086833	6.91228	-1.80913	0.0875367	0.562752
10728247	Esrra	estrogen related receptor, alpha	-0.139566	4.81105	-1.80798	0.0877219	0.562752
10891324	Zdhhc22	zinc finger DHHC-type palmitoyltransferase 22	-0.34097	6.74938	-1.80754	0.0877937	0.562752
10855356	Atp6v0e2	ATPase, H+ transporting V0 subunit e2	-0.114869	8.51585	-1.80677	0.0879184	0.562752
10768874	Cep350	centrosomal protein 350	0.104821	6.37556	1.80654	0.0879556	0.562752
10746916	Ormdl3	ORMDL sphingolipid biosynthesis regulator 3	-0.110018	6.12686	-1.80638	0.0879815	0.562752
10781207	Adra1a	adrenoceptor alpha 1A	-0.246563	5.91503	-1.80476	0.0882438	0.562752
10812216	Glrx	glutaredoxin	-0.211662	8.56996	-1.80422	0.0883303	0.562752
10792333	Zmat4	zinc finger, matrin type 4	-0.12991	4.96735	-1.80392	0.0883788	0.562752
10802026	Camk2a	calcium/calmodulin-dependent protein kinase II alpha	-0.141595	11.4504	-1.80389	0.0883846	0.562752
10842197	Zswim3	zinc finger, SWIM-type containing 3	-0.0972554	4.3762	-1.80356	0.0884379	0.562752
10741907	Npm1	nucleophosmin 1	0.148225	8.10731	1.80352	0.088445	0.562752
10925291	Ackr3	atypical chemokine receptor 3	0.132849	6.07911	1.8034	0.0884641	0.562752
10918718	Tmod3	tropomodulin 3	0.143471	6.21655	1.80318	0.0885	0.562752
10802650	Myo5b	myosin Vb	0.2954	6.38006	1.80297	0.088534	0.562752
10855449	Gpnmb	glycoprotein nmb	0.109471	4.96687	1.80283	0.0885571	0.562752
10773290	Wfs1	wolframin ER transmembrane glycoprotein	-0.245061	8.59783	-1.80276	0.0885673	0.562752
10907952	Tmem123	transmembrane protein 123	0.122749	5.50357	1.8021	0.0886747	0.562752
10858085	Washc2c	WASH complex subunit 2C	-0.074828	7.88673	-1.80173	0.0887364	0.562752
10718043	Pde10a	phosphodiesterase 10A	0.475285	7.85327	1.80103	0.0888501	0.562752
10936853	Mid1ip1	MID1 interacting protein 1	0.201073	5.84147	1.79997	0.0890235	0.562752
10940531	Vti1a	vesicle transport through interaction with t-SNAREs 1A	-0.167245	9.14508	-1.79973	0.0890622	0.562752
10828442	Pfdn6	prefoldin subunit 6	-0.134303	8.2867	-1.79972	0.0890633	0.562752
10737651	Zfp652	zinc finger protein 652	0.144679	6.23643	1.79971	0.0890658	0.562752
10787556	Tmem59l	transmembrane protein 59-like	-0.203812	8.78167	-1.79948	0.0891029	0.562752
10809007	Car7	carbonic anhydrase 7	-0.452425	6.45586	-1.79943	0.0891117	0.562752
10752764	RGD1563888	similar to DNA segment, Chr 16, ERATO Doi 472, expressed	0.203297	5.11836	1.79912	0.0891626	0.562752
10783662	Homez	homeobox and leucine zipper encoding	-0.104736	4.52926	-1.79896	0.0891873	0.562752
10762985	Ddx51	DEAD-box helicase 51	-0.104456	4.42705	-1.79892	0.0891947	0.562752
10887239	Tecpr2	tectonin beta-propeller repeat containing 2	-0.18153	6.42125	-1.79863	0.0892423	0.562752
10917034	Tagln	transgelin	0.68024	5.95398	1.79838	0.0892836	0.562752
10743825	Pfas	phosphoribosylformylglycinamidine synthase	-0.171031	5.01762	-1.79818	0.0893151	0.562752
10851724	Cdh22	cadherin 22	-0.112515	6.04557	-1.79759	0.0894133	0.562752
10883865	Taf1b	TATA-box binding protein associated factor, RNA polymerase I subunit B	-0.140407	4.71154	-1.79751	0.0894258	0.562752
10920600	Arpp21	cAMP regulated phosphoprotein 21	-0.243682	9.02219	-1.79681	0.0895409	0.562752
10753279	Erg	ETS transcription factor ERG	-0.181313	5.32793	-1.79657	0.0895806	0.562752
10741308	Cramp1	cramped chromatin regulator homolog 1	-0.0947948	6.04839	-1.79603	0.0896694	0.562752
10758064	Rimbp2	RIMS binding protein 2	-0.329773	7.52568	-1.79581	0.0897046	0.562752
10733582	Acsl6	acyl-CoA synthetase long-chain family member 6	-0.103797	8.83171	-1.79577	0.0897121	0.562752
10740701	Vasn	vasorin	-0.164286	5.70338	-1.79563	0.0897338	0.562752
10809462	Srrd	SRR1 domain containing	-0.111409	6.10901	-1.79525	0.0897971	0.562752
10898196	Mpped1	metallophosphoesterase domain containing 1	-0.3721	7.84454	-1.79518	0.0898087	0.562752
10905785	Rrp7a	ribosomal RNA processing 7 homolog A	-0.173041	7.20887	-1.79517	0.0898101	0.562752
10839790	Sirpa	signal-regulatory protein alpha	-0.101016	9.48962	-1.79427	0.0899583	0.562752
10762723	Sppl3	signal peptide peptidase like 3	-0.086745	8.03986	-1.79381	0.0900346	0.562752
10761545	Bri3bp	Bri3 binding protein	-0.138563	7.64043	-1.79377	0.0900406	0.562752
10724542	Dchs1	dachsous cadherin-related 1	0.196066	4.24924	1.79347	0.0900914	0.562752
10777928	Limk2	LIM domain kinase 2	-0.113898	6.58902	-1.79291	0.0901826	0.562752
10871833	Inpp5b	inositol polyphosphate-5-phosphatase B	-0.132315	7.1128	-1.79264	0.0902281	0.562752
10852539	Arfrp1	ADP-ribosylation factor related protein 1	-0.110542	6.00506	-1.79245	0.0902589	0.562752
10861997	Hipk2	homeodomain interacting protein kinase 2	0.147595	9.6305	1.79227	0.0902887	0.562752
10781999	Gpc6	glypican 6	-0.166105	5.51213	-1.79217	0.0903061	0.562752
10769719	Uhmk1	U2AF homology motif kinase 1	0.131439	7.01962	1.79203	0.0903281	0.562752
10766378	Srp9	signal recognition particle 9	-0.123921	7.2211	-1.79176	0.0903733	0.562752
10789574	Cars2	cysteinyl-tRNA synthetase 2, mitochondrial	-0.100491	5.00286	-1.79159	0.0904011	0.562752
10912161	Ctsh	cathepsin H	0.146878	7.36527	1.79155	0.0904074	0.562752
10869267	Hsdl2	hydroxysteroid dehydrogenase like 2	0.0805259	6.76529	1.79134	0.0904434	0.562752
10856643	Dctn1	dynactin subunit 1	-0.101976	8.35099	-1.79132	0.0904468	0.562752
10930990	Dpp9	dipeptidyl peptidase 9	-0.153595	6.93458	-1.79126	0.0904561	0.562752
10767444	Pfkfb2	6-phosphofructo-2-kinase/fructose-2,6-biphosphatase 2	-0.128943	5.87149	-1.79112	0.0904802	0.562752
10864371	Frmd4b	FERM domain containing 4B	0.194615	5.89349	1.79029	0.0906171	0.562752
10778683	Ehbp1	EH domain binding protein 1	-0.144091	7.56408	-1.79	0.0906653	0.562752
10912119	Rasgrf1	RAS protein-specific guanine nucleotide-releasing factor 1	-0.0792201	9.43617	-1.78996	0.0906725	0.562752
10901158	Rab11b	RAB11B, member RAS oncogene family	-0.113664	10.1404	-1.78944	0.090758	0.562752
10929161	Dnpep	aspartyl aminopeptidase	-0.12505	6.56142	-1.78941	0.0907626	0.562752
10766080	Kif26b	kinesin family member 26B	-0.106369	4.16341	-1.78927	0.090786	0.562752
10915708	Elavl3	ELAV like RNA binding protein 3	0.0832098	8.9123	1.789	0.0908321	0.562752
10831444	Fkbpl	FKBP prolyl isomerase like	-0.155649	5.27674	-1.78898	0.0908353	0.562752
10738603	Adam11	ADAM metallopeptidase domain 11	-0.225606	7.35689	-1.78855	0.0909067	0.562752
10704281	Zbtb45	zinc finger and BTB domain containing 45	-0.142759	5.07787	-1.7885	0.0909154	0.562752
10773088	Ldb2	LIM domain binding 2	-0.31734	8.82997	-1.78838	0.0909355	0.562752
10775997	Slc4a4	solute carrier family 4 member 4	0.271674	8.56589	1.78793	0.0910094	0.562752
10900974	Akap8	A-kinase anchoring protein 8	0.127577	6.11484	1.78787	0.0910196	0.562752
10727199	Ppfia1	PTPRF interacting protein alpha 1	0.121035	6.12692	1.78772	0.091045	0.562752
10719654	Zfp94	zinc finger protein 94	-0.125907	4.74795	-1.78739	0.0911002	0.562752
10755803	Mapk1	mitogen activated protein kinase 1	-0.0982476	10.021	-1.78727	0.0911197	0.562752
10763401	Cdh7	cadherin 7	0.201726	6.48406	1.787	0.0911653	0.562752
10795969	Wdr37	WD repeat domain 37	-0.10359	7.18152	-1.7869	0.0911817	0.562752
10790815	Nxnl1	nucleoredoxin-like 1	-0.0960686	4.93535	-1.78654	0.0912408	0.562752
10822781	Dnajc19	DnaJ heat shock protein family (Hsp40) member C19	0.0866044	6.0295	1.78625	0.0912902	0.562752
10712955	mrpl11	mitochondrial ribosomal protein L11	-0.157526	6.87393	-1.78597	0.0913369	0.562752
10831425	Atf6b	activating transcription factor 6 beta	-0.124745	6.63003	-1.78535	0.0914398	0.562752
10927051	Sdhaf4	succinate dehydrogenase complex assembly factor 4	-0.154806	5.35192	-1.78532	0.0914461	0.562752
10871984	Oscp1	organic solute carrier partner 1	-0.145046	6.21095	-1.78474	0.0915418	0.562752
10719212	Selenow	selenoprotein W	0.125009	7.08057	1.78311	0.0918165	0.562752
10786032	Zic5	Zic family member 5	0.141124	4.34451	1.78268	0.0918876	0.562752
10773949	Rhbdd3	rhomboid domain containing 3	-0.148298	4.35837	-1.78202	0.0919993	0.562752
10880516	Mtfr1l	mitochondrial fission regulator 1-like	-0.103083	7.28194	-1.78175	0.0920449	0.562752
10761042	Ap1s1	adaptor-related protein complex 1, sigma 1 subunit	-0.125827	8.97088	-1.78097	0.0921757	0.562752
10745731	Aatf	apoptosis antagonizing transcription factor	-0.14176	5.17949	-1.78087	0.0921933	0.562752
10705329	Coq8b	coenzyme Q8B	-0.128859	5.48021	-1.78071	0.0922196	0.562752
10852351	Cables2	Cdk5 and Abl enzyme substrate 2	-0.18217	7.11338	-1.78003	0.0923344	0.562752
10730446	Npm3	nucleophosmin/nucleoplasmin, 3	0.0932079	4.01397	1.77946	0.0924303	0.562752
10805384	Rbfa	ribosome binding factor A	-0.15573	6.21854	-1.7793	0.0924575	0.562752
10720056	Sptbn4	spectrin, beta, non-erythrocytic 4	-0.105969	4.93584	-1.77929	0.0924582	0.562752
10792843	Mcf2l	MCF.2 cell line derived transforming sequence-like	-0.129388	6.98127	-1.779	0.0925083	0.562752
10912990	Rassf1	Ras association domain family member 1	0.118126	4.69363	1.77842	0.0926067	0.562752
10720037	Shkbp1	Sh3kbp1 binding protein 1	-0.119864	5.14908	-1.77836	0.092616	0.562752
10723419	Arnt2	aryl hydrocarbon receptor nuclear translocator 2	-0.150728	8.05982	-1.77823	0.0926374	0.562752
10924596	Stk11ip	serine/threonine kinase 11 interacting protein	-0.116756	4.90507	-1.77812	0.0926569	0.562752
10873918	Mad2l2	mitotic arrest deficient 2 like 2	-0.108745	4.98373	-1.7781	0.0926595	0.562752
10940533	Cdk5rap3	CDK5 regulatory subunit associated protein 3	-0.0737751	5.33148	-1.77805	0.0926693	0.562752
10908460	Carm1	coactivator-associated arginine methyltransferase 1	-0.115282	7.97216	-1.77803	0.0926717	0.562752
10764050	Fmod	fibromodulin	0.587266	5.11779	1.77737	0.0927832	0.562752
10734673	Gas7	growth arrest specific 7	-0.138361	8.82604	-1.77727	0.0928	0.562752
10822757	Ccdc39	coiled-coil domain containing 39	0.190035	4.75222	1.77708	0.0928325	0.562752
10838902	Mga	MAX dimerization protein MGA	0.125303	6.85417	1.777	0.092847	0.562752
10885235	Prkch	protein kinase C, eta	0.481541	4.75096	1.77692	0.0928598	0.562752
10733218	Mrnip	MRN complex interacting protein	-0.134455	6.39266	-1.7762	0.0929819	0.562752
10761066	Alkbh4	alkB homolog 4, lysine demethylase	-0.16957	4.16669	-1.77519	0.093154	0.562752
10712427	Brsk2	BR serine/threonine kinase 2	-0.203719	8.90162	-1.77515	0.0931603	0.562752
10721046	Chst8	carbohydrate sulfotransferase 8	-0.169028	4.58202	-1.77478	0.0932232	0.562752
10703324	LOC100125364	hypothetical protein LOC100125364	0.183426	4.99401	1.77462	0.0932507	0.562752
10809571	Fto	FTO, alpha-ketoglutarate dependent dioxygenase	-0.0944673	8.49071	-1.77451	0.0932703	0.562752
10715452	Avpi1	arginine vasopressin-induced 1	-0.249062	4.95956	-1.77401	0.0933544	0.562752
10819653	Bcl10	BCL10, immune signaling adaptor	0.141964	6.24565	1.77372	0.0934046	0.562752
10871339	Zswim5	zinc finger, SWIM-type containing 5	0.225172	6.84217	1.77361	0.0934232	0.562752
10787472	Pik3r2	phosphoinositide-3-kinase regulatory subunit 2	-0.173446	7.71619	-1.77273	0.0935734	0.562752
10793909	Spock1	sparc/osteonectin, cwcv and kazal like domains proteoglycan 1	-0.297125	8.88203	-1.77268	0.0935813	0.562752
10732021	Abca3	ATP binding cassette subfamily A member 3	-0.151352	6.37685	-1.77259	0.0935975	0.562752
10765051	Slc9c2	solute carrier family 9, member C2 (putative)	-0.103051	8.25479	-1.77255	0.0936042	0.562752
10933538	Cdkl5	cyclin-dependent kinase-like 5	-0.162188	9.64954	-1.77249	0.0936141	0.562752
10922087	Tfap2d	transcription factor AP-2 delta	0.695727	4.33254	1.77227	0.0936509	0.562752
10839622	Mrps5	mitochondrial ribosomal protein S5	-0.0982106	6.4759	-1.77194	0.0937074	0.562752
10726655	Bet1l	Bet1 golgi vesicular membrane trafficking protein-like	-0.101594	6.09755	-1.77188	0.093719	0.562752
10773922	Ap1b1	adaptor related protein complex 1 subunit beta 1	-0.080906	7.5228	-1.77175	0.0937408	0.562752
10770161	Pld5	phospholipase D family, member 5	0.63115	6.92644	1.77172	0.0937455	0.562752
10787121	Slc35e1	solute carrier family 35, member E1	-0.10533	6.6218	-1.77172	0.093746	0.562752
10737429	Mmd	monocyte to macrophage differentiation-associated	-0.236134	8.67199	-1.77165	0.0937582	0.562752
10864908	LOC685069	similar to H2A histone family, member V isoform 1	0.165761	5.22135	1.77094	0.0938791	0.562752
10740271	Fn3k	fructosamine 3 kinase	-0.148692	6.45565	-1.77	0.0940394	0.562752
10844452	Garnl3	GTPase activating Rap/RanGAP domain-like 3	-0.409717	7.81196	-1.76996	0.0940467	0.562752
10914066	Abhd5	abhydrolase domain containing 5, lysophosphatidic acid acyltransferase	0.116884	5.79888	1.76977	0.0940787	0.562752
10800913	Fam53c	family with sequence similarity 53, member C	-0.166155	7.01071	-1.76955	0.0941179	0.562752
10871652	Rims3	regulating synaptic membrane exocytosis 3	-0.473531	6.71055	-1.76896	0.0942185	0.562752
10940574	LOC257642	rRNA promoter binding protein	-0.185288	9.35938	-1.76887	0.094234	0.562752
10792441	Slc20a2	solute carrier family 20 member 2	0.15066	7.12323	1.76772	0.0944323	0.562752
10844302	Dnm1	dynamin 1	-0.168171	10.5561	-1.76769	0.0944365	0.562752
10848740	Pla2g4e	phospholipase A2, group IVE	-0.2098	5.27574	-1.76743	0.0944817	0.562752
10736163	Flot2	flotillin 2	-0.132997	7.00065	-1.76722	0.0945182	0.562752
10805986	Ciapin1	cytokine induced apoptosis inhibitor 1	-0.125558	6.23592	-1.76705	0.0945466	0.562752
10833144	Fam241b	family with sequence similarity 241 member B	-0.13721	5.60416	-1.76688	0.0945761	0.562752
10754010	Nepro	nucleolus and neural progenitor protein	-0.143744	4.6973	-1.76681	0.0945889	0.562752
10940487	Myl12b	myosin light chain 12B	-0.100345	10.3984	-1.76671	0.0946049	0.562752
10804632	Slc6a7	solute carrier family 6 member 7	-0.352286	6.16408	-1.76626	0.0946825	0.562752
10842104	Rbpjl	recombination signal binding protein for immunoglobulin kappa J region-like	0.154578	4.12676	1.7661	0.0947114	0.562752
10900161	Tle2	TLE family member 2, transcriptional corepressor	-0.12024	4.65279	-1.76602	0.0947244	0.562752
10753257	Pigp	phosphatidylinositol glycan anchor biosynthesis, class P	0.157061	6.65606	1.7659	0.0947456	0.562752
10885305	Syne2	spectrin repeat containing nuclear envelope protein 2	0.20712	4.49873	1.76586	0.0947529	0.562752
10750750	Lnp1	leukemia NUP98 fusion partner 1	0.417699	4.16052	1.76564	0.0947893	0.562752
10900201	Mfsd12	major facilitator superfamily domain containing 12	-0.13227	6.7081	-1.76551	0.0948132	0.562752
10812524	Arsb	arylsulfatase B	0.102866	7.32764	1.76477	0.0949406	0.562752
10839103	Adal	adenosine deaminase-like	-0.0795742	4.57972	-1.76476	0.0949421	0.562752
10708589	Picalm	phosphatidylinositol binding clathrin assembly protein	0.132039	6.46918	1.76455	0.094978	0.562752
10795253	Abt1	activator of basal transcription 1	-0.0978794	5.93067	-1.76419	0.0950408	0.562752
10779031	Camk2g	calcium/calmodulin-dependent protein kinase II gamma	-0.24827	9.08691	-1.76378	0.0951122	0.562752
10775484	Arhgap24	Rho GTPase activating protein 24	0.161543	4.63061	1.76362	0.0951388	0.562752
10783648	Slc7a8	solute carrier family 7 member 8	-0.107349	8.20841	-1.76351	0.0951578	0.562752
10769854	Usp21	ubiquitin specific peptidase 21	-0.0779318	7.24787	-1.7635	0.0951599	0.562752
10830189	Gja1	gap junction protein, alpha 1	0.163691	8.96317	1.76339	0.0951793	0.562752
10825042	Tars2	threonyl-tRNA synthetase 2, mitochondrial	-0.0824047	5.65479	-1.76321	0.0952104	0.562752
10820308	Atp6ap1l	ATPase H+ transporting accessory protein 1 like	0.68663	6.95693	1.76296	0.0952538	0.562752
10848852	Lrrc57	leucine rich repeat containing 57	-0.380184	6.16016	-1.76294	0.0952571	0.562752
10772655	Rps23	ribosomal protein S23	0.102902	8.01596	1.76269	0.0953001	0.562752
10833013	Unc5b	unc-5 netrin receptor B	0.194741	6.59516	1.76142	0.0955204	0.562752
10721350	Emc10	ER membrane protein complex subunit 10	-0.156436	7.56369	-1.7613	0.0955422	0.562752
10720130	Zfp780b-ps1	zinc finger protein 780B, pseudogene 1	0.16361	4.329	1.7611	0.0955762	0.562752
10741504	Haghl	hydroxyacylglutathione hydrolase-like	-0.105973	4.56487	-1.76085	0.0956194	0.562752
10852570	Zfp512b	zinc finger protein 512B	-0.100394	6.10663	-1.76084	0.095621	0.562752
10868829	Ncbp1	nuclear cap binding protein subunit 1	0.117138	6.79775	1.75984	0.0957963	0.562752
10714432	Apba1	amyloid beta precursor protein binding family A member 1	-0.151171	8.43368	-1.75969	0.0958218	0.562752
10906746	Col2a1	collagen type II alpha 1 chain	-0.0933669	4.02973	-1.75946	0.0958627	0.562752
10832460	Zfp280b	zinc finger protein 280B	0.216871	5.65496	1.7592	0.0959067	0.562752
10769807	Sdhc	succinate dehydrogenase complex subunit C	0.0996635	8.32376	1.75878	0.0959803	0.562752
10725610	Gsg1l	GSG1-like	-0.166562	7.01559	-1.75861	0.0960104	0.562752
10934118	Ar	androgen receptor	-0.193112	4.69514	-1.75817	0.0960878	0.562752
10705571	Sars2	seryl-tRNA synthetase 2, mitochondrial	-0.127233	5.60111	-1.75806	0.0961068	0.562752
10768269	Cfh	complement factor H	0.196625	5.9527	1.75799	0.0961188	0.562752
10786478	Rft1	RFT1 homolog	-0.127262	5.21611	-1.75791	0.0961329	0.562752
10876896	Ctnnal1	catenin alpha-like 1	0.286025	5.40417	1.75782	0.0961491	0.562752
10749663	P4hb	prolyl 4-hydroxylase subunit beta	0.0990705	7.55329	1.7578	0.0961525	0.562752
10738591	Fzd2	frizzled class receptor 2	0.171227	5.92798	1.75744	0.0962154	0.562839
10905429	Tmem184b	transmembrane protein 184B	-0.175125	7.91436	-1.75704	0.0962849	0.562963
10724507	Arfip2	ADP-ribosylation factor interacting protein 2	-0.0951406	7.22799	-1.7563	0.0964136	0.562984
10773481	Mfsd10	major facilitator superfamily domain containing 10	-0.14462	6.04029	-1.75609	0.0964519	0.562984
10918776	Mlip	muscular LMNA-interacting protein	-0.366557	8.7189	-1.75597	0.0964714	0.562984
10882840	Foxn2	forkhead box N2	0.125274	5.78926	1.75546	0.0965611	0.562984
10775591	Prdm8	PR/SET domain 8	-0.156379	4.523	-1.75512	0.0966221	0.562984
10815281	Noct	nocturnin	-0.12617	6.31269	-1.75509	0.0966259	0.562984
10844916	Scai	suppressor of cancer cell invasion	-0.191325	8.0379	-1.75317	0.0969649	0.564277
10856863	Emx1	empty spiracles homeobox 1	-0.344659	4.59949	-1.75301	0.0969927	0.564277
10852588	Samd10	sterile alpha motif domain containing 10	-0.14635	4.68319	-1.75255	0.0970738	0.564319
10761238	Abhd11	abhydrolase domain containing 11	-0.219676	5.41884	-1.7521	0.0971524	0.564319
10863635	Spr	sepiapterin reductase	-0.159217	4.73096	-1.7518	0.0972049	0.564319
10742247	Nipal4	NIPA-like domain containing 4	0.176596	5.79588	1.75158	0.0972446	0.564319
10897006	Adgrb1	adhesion G protein-coupled receptor B1	-0.148115	8.19828	-1.75116	0.097319	0.564319
10887506	Siva1	SIVA1, apoptosis-inducing factor	0.128584	4.94649	1.75043	0.0974473	0.564319
10744212	Slc35g3	solute carrier family 35, member G3	-0.0970183	4.65207	-1.75002	0.0975196	0.564319
10862765	Herc6	HECT and RLD domain containing E3 ubiquitin protein ligase family member 6	-0.273029	5.52654	-1.75002	0.0975208	0.564319
10756077	Higd2a	HIG1 hypoxia inducible domain family, member 2A	-0.150718	9.22703	-1.7497	0.0975773	0.564319
10766253	Tmem63a	transmembrane protein 63a	0.214876	5.21175	1.74959	0.0975955	0.564319
10837105	Plekha3	pleckstrin homology domain containing A3	-0.0894019	8.7015	-1.74955	0.0976036	0.564319
10895406	Phlda1	pleckstrin homology-like domain, family A, member 1	0.190359	7.07415	1.749	0.0977014	0.564319
10737527	Mrpl27	mitochondrial ribosomal protein L27	-0.128036	6.39214	-1.74892	0.0977142	0.564319
10779368	Thoc7	THO complex 7	0.135609	5.62853	1.74887	0.0977245	0.564319
10778028	Tcn2	transcobalamin 2	0.171886	6.54984	1.74706	0.0980451	0.564618
10782187	Itgbl1	integrin subunit beta like 1	0.291393	5.09496	1.74704	0.0980491	0.564618
10912088	Nt5e	5' nucleotidase, ecto	0.305213	4.24184	1.74695	0.0980654	0.564618
10790912	Rab3a	RAB3A, member RAS oncogene family	-0.113759	10.6811	-1.74662	0.0981235	0.564618
10925933	Tmem200c	transmembrane protein 200C	-0.230395	6.63385	-1.74551	0.09832	0.564618
10826148	Ntng1	netrin G1	0.22886	6.36873	1.74517	0.0983816	0.564618
10770479	Brox	BRO1 domain and CAAX motif containing	0.0923623	6.44975	1.74488	0.098433	0.564618
10898368	Ttc38	tetratricopeptide repeat domain 38	-0.166695	4.93389	-1.74481	0.0984458	0.564618
10762296	Iqcd	IQ motif containing D	-0.124628	4.07227	-1.74379	0.0986274	0.564618
10914823	Cfap300	cilia and flagella associated protein 300	0.175133	4.33458	1.74298	0.0987718	0.564618
10851960	Spata2	spermatogenesis associated 2	-0.173911	6.73587	-1.74292	0.0987833	0.564618
10933408	Mospd2	motile sperm domain containing 2	0.153895	5.5056	1.74286	0.0987946	0.564618
10796292	Cdc123	cell division cycle 123	-0.0885976	7.93883	-1.74279	0.0988062	0.564618
10783849	Tm9sf1	transmembrane 9 superfamily member 1	-0.099094	5.66067	-1.74263	0.0988358	0.564618
10792775	Lamp1	lysosomal-associated membrane protein 1	0.0732851	8.47178	1.74253	0.0988529	0.564618
10716803	Utrn	utrophin	0.0940012	6.22318	1.74252	0.0988542	0.564618
10908084	Vstm5	V-set and transmembrane domain containing 5	-0.253403	5.17562	-1.74214	0.098923	0.564618
10862834	Hint1	histidine triad nucleotide binding protein 1	0.0871536	7.24841	1.74208	0.0989337	0.564618
10733709	G3bp1	G3BP stress granule assembly factor 1	-0.074958	6.37949	-1.74203	0.0989432	0.564618
10708745	Gab2	GRB2-associated binding protein 2	0.0842442	6.3563	1.7417	0.0990015	0.564618
10893641	Sgta	small glutamine rich tetratricopeptide repeat co-chaperone alpha	-0.137113	8.0186	-1.74146	0.0990455	0.564618
10894618	Nfyb	nuclear transcription factor Y subunit beta	-0.159306	5.81604	-1.74133	0.0990675	0.564618
10701709	Lats1	large tumor suppressor kinase 1	0.0858496	7.01418	1.74096	0.0991338	0.564618
10865401	Pex5	peroxisomal biogenesis factor 5	-0.123869	4.49727	-1.74088	0.0991494	0.564618
10757726	Eln	elastin	0.232969	5.03331	1.74079	0.0991646	0.564618
10863808	Arhgap25	Rho GTPase activating protein 25	-0.384425	6.32491	-1.74078	0.0991672	0.564618
10737838	Arhgap23	Rho GTPase activating protein 23	0.124972	5.64877	1.74054	0.0992106	0.564618
10792104	Tti2	TELO2 interacting protein 2	-0.0889459	4.80275	-1.73995	0.0993167	0.564618
10908694	B3gat1	beta-1,3-glucuronyltransferase 1	-0.236363	8.90335	-1.73875	0.0995319	0.564618
[truncated: 8,868 more rows]

## Sheet: S2 GO BP 40min
Table S2: GSEA results for GO Biological Process annotation in the PFC immediately after FS
Columns	ID: Gene set ID; Description: Gene Set Description; setSize: Gene Set size; enrichmentScore: enrichment Score; NES: enrichment score normalized to mean enrichment of random samples of the same size; pvalue: enrichment p-value; p.adjust: Benjamini & Hochberg adjusted p-value; core_enrichment: leading edge genes
ID	Description	setSize	enrichmentScore	NES	pvalue	p.adjust	core_enrichment
GO:0009611	response to wounding	377	0.436552	2.11531	1e-10	4.32369e-07	Nts/Drd2/Prkcd/Fmod/Kremen1/Acta2/Pard3/Flna/Dcn/Fgf1/Plat/Mag/Igf2/Gsn/Myl9/Apod/Tgfb2/Abi3bp/Cd9/Drd5/Csrp1/Timp1/Serping1/Slc12a2/Erbb3/Prcp/Zfp36/C3/Col1a1/Jam3/Rgma/Adra2c/Ddr1/Mcam/Col3a1/Kank1/Mylk/Enpp4/Pros1/Thbs1/Itgb1/Sparc/Fgfr2/Ano6/Sdc2/Notch2/Alox15/Pdgfra/A2m/Anxa2/Oprm1/Inpp5f/Vcan/Cfh/Cers2/Pllp/Papss2/Slc7a11/Tgfa/Gli3/Adam17/Prkcq/Zfp36l1/Cav1/Vcl/Gpx1/Klf4/Atp7a/Kcnk2/Gja1/Ar…
GO:0042063	gliogenesis	277	0.446061	2.09473	3.78556e-10	4.32369e-07	Drd1/Adora2a/Penk/Vim/Prkch/Pard3/Myrf/Tf/Lpar1/Sox11/Mag/Mobp/Opalin/Fa2h/Gsn/Tspan2/Tgfb2/Ndrg1/Cd9/Adgrg6/Trpc4/Ezh2/Enpp2/Erbb3/Cnp/Dlx2/Plp1/Id4/Olig2/Sox4/Aspa/Olig1/Dlx1/Pmp22/Mmp14/Sox10/Syne2/Tmem98/Bag1/Vcan/Slc8a3/Dner/Cers2/Csf1/Gli3/Nkx6-2/Ptprz1/Ptpn11/Sirt2/Rtn4/Abca2/Fgf2/Dbi/Plpp3/Qk/Bmp4/Atp1b2/Fn1/Tcf7l2/Kcnj10/Il6st/Dusp15/Ppp1cc/Abl1/Csf1r/Smo/Pals1/Notch1/Hdac11/C1qa
GO:0071407	cellular response to organic cyclic compound	496	0.371253	1.84641	3.85401e-10	4.32369e-07	Nts/Drd2/Rgs9/Drd1/Htr2c/Penk/Gnal/Ppp1r1b/Adcy5/Rxrg/Sfrp1/Sgk1/Foxo1/Flna/Nfkbia/Tf/Plat/Ddit4/Drd5/Klf2/Dab2/Gstm2/Ezh2/Htr4/Stc1/Colec12/Cbx3/Msn/Fbxo32/Enpp2/Zfp36/Col1a1/Lrrk2/Errfi1/Kcnmb1/Spidr/Htr1d/Eln/Tiparp/Itgb1/Npc1/Sox10/Cdk4/Oprm1/Slc8a3/Pde3a/Ptch1/Ddx17/Hmgcs2/Rgs8/Folr2/Gstm7/Hsd17b4/Zfp36l1/Cav1/Fzd2/Gna12/Nr3c2/Pkd2/Klf4/Ephx1/Ass1/Bmp7/Enpp1/Cav2/Sirt2/Ubr5/Nefh/Npm1/Aqp1/Cd…
GO:0042552	myelination	136	0.551951	2.34417	4.22231e-10	4.32369e-07	Rarb/Rxrg/Ugt8/Pard3/Myrf/Tf/Mal/Lpar1/Mag/Mobp/Fa2h/Mbp/Tspan2/Ndrg1/Cd9/Adgrg6/Serinc5/Bcas1/Gjc3/Plp1/Id4/Jam3/Olig2/Aspa/Pmp22/Sox10/Tmem98/Fam126a/Slc8a3/Pllp/Nkx6-2/Ptprz1/Ctsc/Sirt2/Megf10/Abca2/Qk/Tcf7l2/Kcnj10/Cyfip1/Jam2/Pals1/Mtmr2
GO:0042060	wound healing	247	0.463095	2.12534	4.34117e-10	4.32369e-07	Prkcd/Fmod/Acta2/Pard3/Flna/Dcn/Fgf1/Plat/Igf2/Gsn/Myl9/Tgfb2/Abi3bp/Cd9/Drd5/Csrp1/Timp1/Serping1/Slc12a2/Prcp/C3/Col1a1/Adra2c/Ddr1/Mcam/Col3a1/Kank1/Mylk/Enpp4/Pros1/Thbs1/Itgb1/Sparc/Fgfr2/Ano6/Sdc2/Notch2/Alox15/Pdgfra/Anxa2/Oprm1/Cfh/Papss2/Slc7a11/Tgfa/Gli3/Adam17/Prkcq/Cav1/Vcl/Gpx1/Gja1/Arhgap24/Ccn1/Stxbp3/Aqp1/Rhoc/Fgf2/Plpp3/Abat/Bmp4/Fn1/Tgfbr2/Adipor2/Pecam1/Tnfrsf12a/Naca/Nbeal2/Mu…
GO:0007272	ensheathment of neurons	138	0.551086	2.34616	5.65505e-10	4.32369e-07	Rarb/Rxrg/Ugt8/Pard3/Myrf/Tf/Mal/Lpar1/Mag/Mobp/Fa2h/Mbp/Tspan2/Ndrg1/Cd9/Adgrg6/Serinc5/Bcas1/Cldn11/Gjc3/Plp1/Id4/Jam3/Olig2/Aspa/Pmp22/Sox10/Tmem98/Fam126a/Slc8a3/Pllp/Nkx6-2/Ptprz1/Ctsc/Sirt2/Megf10/Abca2/Qk/Tcf7l2/Kcnj10/Cyfip1/Jam2/Pals1/Mtmr2
GO:0008366	axon ensheathment	138	0.551086	2.34616	5.65505e-10	4.32369e-07	Rarb/Rxrg/Ugt8/Pard3/Myrf/Tf/Mal/Lpar1/Mag/Mobp/Fa2h/Mbp/Tspan2/Ndrg1/Cd9/Adgrg6/Serinc5/Bcas1/Cldn11/Gjc3/Plp1/Id4/Jam3/Olig2/Aspa/Pmp22/Sox10/Tmem98/Fam126a/Slc8a3/Pllp/Nkx6-2/Ptprz1/Ctsc/Sirt2/Megf10/Abca2/Qk/Tcf7l2/Kcnj10/Cyfip1/Jam2/Pals1/Mtmr2
GO:0010001	glial cell differentiation	211	0.472142	2.14543	1.36809e-09	9.15254e-07	Drd1/Adora2a/Vim/Pard3/Myrf/Lpar1/Sox11/Mag/Mobp/Opalin/Fa2h/Gsn/Tspan2/Ndrg1/Cd9/Adgrg6/Trpc4/Enpp2/Erbb3/Cnp/Dlx2/Plp1/Id4/Olig2/Sox4/Aspa/Olig1/Dlx1/Pmp22/Sox10/Tmem98/Bag1/Slc8a3/Dner/Gli3/Nkx6-2/Ptprz1/Ptpn11/Sirt2/Rtn4/Abca2/Fgf2/Plpp3/Qk/Bmp4/Tcf7l2/Kcnj10/Il6st/Dusp15/Abl1/Csf1r/Smo/Pals1/Notch1/Hdac11/C1qa
GO:0007186	G protein-coupled receptor signaling pathway	409	0.387618	1.89722	1.56487e-09	9.30578e-07	Nts/Drd2/Cartpt/Rgs9/Drd1/Gpr101/Adora2a/Ecel1/Tac1/Gng7/Htr2c/Penk/Gnal/Oprk1/Adcy5/Gpr149/Gpr165/Pdyn/Klk6/Gpr6/Gpr88/Pde10a/Flna/Pln/Lpar1/Gpr37/Nmbr/Oxtr/Glra2/Drd5/Actn2/Adgrg6/Ednrb/Htr4/Car2/Dgkb/S1pr5/Galr1/Olr769/Ackr4/C3/Gpr139/Necab2/Gnb4/Adra2c/Tacr1/Nppa/Htr1d/Ano1/Itgb1/Rgs2/Baiap3/Arrdc3/Oprm1/Prok2/Grm4/Rgs8/Cav1/Fzd2/Gna12/Gng5/Lgr5/Kcnk2/Adgrv1/Adcyap1r1/Gprc5b/Dynlt1
GO:0021782	glial cell development	104	0.573639	2.35277	7.8134e-09	4.18173e-06	Drd1/Adora2a/Vim/Pard3/Myrf/Lpar1/Sox11/Mag/Mobp/Fa2h/Gsn/Tspan2/Ndrg1/Cd9/Adgrg6/Plp1/Id4/Sox4/Aspa/Olig1/Pmp22/Sox10/Nkx6-2/Sirt2/Abca2/Tcf7l2/Kcnj10/Csf1r/Smo/Pals1/Hdac11/C1qa/Mdk
GO:0001975	response to amphetamine	42	0.733153	2.53446	1.66463e-08	8.09918e-06	Nts/Drd2/Rgs9/Drd1/Adora2a/Gnal/Ppp1r1b/Nr4a2/Pde1b/Oxtr/Drd5/Ptpn5/Rgs2/Dcc/Ddit3/Rgs8
GO:0014075	response to amine	60	0.654167	2.42067	4.47461e-08	1.99567e-05	Nts/Drd2/Rgs9/Drd1/Adora2a/Gnal/Ppp1r1b/Nr4a2/Pde1b/Oxtr/Drd5/Ptpn5/Rgs2/Dcc/Ddit3/Rgs8/Pdxk/Ass1/Hnmt
GO:0001944	vasculature development	486	0.345482	1.71676	6.69791e-08	2.74204e-05	Apold1/Nrp2/Gpc3/Acta2/Foxo1/Clic4/Flna/Dcn/Fgf1/Igf2/Col1a2/Tgfb2/Btg1/Klf2/Gab1/Slc12a2/Sulf1/Enpp2/Thbs2/Prcp/C3/Col1a1/Scg2/Jam3/Chd7/Mcam/Col3a1/Errfi1/Sox4/Cald1/Mylk/Meis1/Eln/Tiparp/Jcad/Thbs1/Itgb1/Ccn2/Sparc/Nfatc3/Mmp14/Fgfr2/Notch2/Pdgfra/Anxa2/Ago2/Itgb1bp1/Cfh/Prok2/Pik3c2a/Ddit3/Tgfa/Aldh1a2/Tgfbr3/Gli3/Enpep/Zfp36l1/Prkd1/Col18a1/Prrx1/Cav1/Erap1/Gpx1/Tmem100/Pkd2/Klf4/Gadd45a/Atp…
GO:0048709	oligodendrocyte differentiation	113	0.54113	2.24891	7.17274e-08	2.74204e-05	Myrf/Lpar1/Sox11/Mag/Mobp/Opalin/Fa2h/Gsn/Tspan2/Cd9/Trpc4/Enpp2/Cnp/Dlx2/Plp1/Id4/Olig2/Aspa/Olig1/Dlx1/Sox10/Tmem98/Slc8a3/Gli3/Nkx6-2/Ptprz1/Sirt2/Rtn4/Abca2/Qk/Bmp4/Tcf7l2/Kcnj10/Dusp15
GO:0001568	blood vessel development	460	0.351677	1.7415	9.66136e-08	3.44717e-05	Apold1/Nrp2/Gpc3/Acta2/Foxo1/Clic4/Flna/Dcn/Fgf1/Igf2/Col1a2/Tgfb2/Btg1/Klf2/Gab1/Slc12a2/Sulf1/Enpp2/Thbs2/Prcp/C3/Col1a1/Scg2/Jam3/Chd7/Mcam/Col3a1/Sox4/Cald1/Mylk/Meis1/Eln/Tiparp/Jcad/Thbs1/Itgb1/Ccn2/Sparc/Nfatc3/Mmp14/Fgfr2/Notch2/Pdgfra/Anxa2/Ago2/Itgb1bp1/Cfh/Prok2/Pik3c2a/Ddit3/Tgfa/Aldh1a2/Tgfbr3/Gli3/Enpep/Zfp36l1/Prkd1/Col18a1/Prrx1/Cav1/Erap1/Gpx1/Tmem100/Pkd2/Klf4/Gadd45a/Atp7a/Gja1…
GO:0007423	sensory organ development	408	0.361635	1.76875	1.56499e-07	5.2349e-05	Drd2/Rarb/Nr4a2/Pbx3/Vim/Clic4/Dlx6/Ntn1/Sox11/Ache/Dlx5/Tenm3/Six3/Bcl11b/Tgfb2/Spag6l/Pou3f4/Foxp2/Bmp6/Erbb3/Ahi1/C3/Dlx2/Ddr1/Chd7/Vax1/Itga8/Myo6/Dlx1/Meis1/Cryab/Fat1/Tmem132e/Sparc/Fgfr2/Notch2/Pdgfra/Cdk4/Meis2/Cfh/Dchs1/Zeb1/Slc7a11/Pls1/Aldh1a2/Gli3/Cdon/Lrig1/Slc25a25/Prrx1/Rbp4/Fzd2/Plaat3/Ptpn11/Klf4/Lgr5/Kcnk2/Gja1/Bmp7/Hmgn1/Adgrv1/Anp32b/Mycl/Sox2/Rcn1/Hipk2/Aqp1/Cdkn1b/Alms1/Prox…
GO:0007626	locomotory behavior	201	0.437032	1.98717	2.17025e-07	6.83246e-05	Drd2/Drd1/Adora2a/Gng7/Htr2c/Penk/Ppp1r1b/Oprk1/Zic1/Adcy5/Nr4a2/Pbx3/Gpr88/Pde1b/Gpr37/Rasd2/Strn/Efnb3/Lrrk2/Cnp/Gaa/Chd7/Myo6/Meis1/Fign/Gad1/Gpr52/Pmp22/Npc1/Arrdc3/Oprm1/Inpp5f
GO:0009314	response to radiation	358	0.369561	1.78742	4.76297e-07	0.00013828	Nts/Drd2/Rgs9/Drd1/Penk/Ppp1r1b/Oprk1/Prkcd/Ap1s2/Gpr88/Sfrp1/Vim/Sgk1/Mme/Pde1b/Igf2/Tgfb2/Sik1/Drd5/Timp1/Crip1/Col3a1/Spidr/Cryab/Itgb1/Mfap4/Tanc1/Net1/Vcam1/Oprm1/Meis2/Mat2a/Slc7a11/Fos/Ptprz1/Rbp4/Cav1/Uaca/Gpx1/Pdxk/Gadd45a/Dusp1/Hmgn1/Trim32/Tank/Pde8b/Npm1/Aqp1/Rpl26/Nipbl/Map3k20/Trpm7/Kcnj10/Ppp1cc/Sema5b/Prkaa1
GO:1903350	response to dopamine	63	0.608752	2.28894	5.16742e-07	0.00013828	Drd2/Rgs9/Drd1/Htr2c/Gnal/Adcy5/Flna/Drd5/Htr4/Lrrk2/Htr1d/Oprm1/Rgs8/Gna12/Cav2/Gnai3/Caly/Nsg1/Sin3a/Tgm2
GO:1903351	cellular response to dopamine	63	0.608752	2.28894	5.16742e-07	0.00013828	Drd2/Rgs9/Drd1/Htr2c/Gnal/Adcy5/Flna/Drd5/Htr4/Lrrk2/Htr1d/Oprm1/Rgs8/Gna12/Cav2/Gnai3/Caly/Nsg1/Sin3a/Tgm2
GO:0040017	positive regulation of locomotion	410	0.348279	1.7041	7.02018e-07	0.000171968	Drd1/Tac1/Oprk1/Sh3rf2/S100a11/Acta2/Flna/Tf/Fgf1/Lpar1/Ntn1/Igf2/Tgfb2/Gab1/Dab2/Enpp2/Col1a1/Plp1/Scg2/Jam3/Mcam/Tacr1/Sema6d/Map4k4/Mylk/Jcad/Thbs1/Itgb1/Sparc/Mmp14/Ano6/Pdgfra/Syne2/Wnk1/Ago2/Itgb1bp1/Pik3c2a/Csf1/Adam17/Ptprz1/Prkd1/Col18a1/Cav1/Atp7a/Gja1/Bmp7/Trim32/Mospd2/Rdx/Rtn4/Ccn1/Ctsh/Aqp1/Rhoc/Prox1/Fgf2/Nipbl/Plpp3/Sp1/Bmp4/Fn1/Cd74/Il6st/Ackr3/Tgfbr2/Cpne3/Sema5b/Pecam1/Megf8/Se…
GO:0048514	blood vessel morphogenesis	389	0.355722	1.73268	7.06895e-07	0.000171968	Apold1/Nrp2/Clic4/Flna/Dcn/Fgf1/Igf2/Tgfb2/Btg1/Klf2/Gab1/Slc12a2/Sulf1/Enpp2/Thbs2/Prcp/C3/Scg2/Jam3/Chd7/Mcam/Col3a1/Sox4/Cald1/Mylk/Meis1/Tiparp/Jcad/Thbs1/Itgb1/Ccn2/Sparc/Nfatc3/Mmp14/Fgfr2/Notch2/Pdgfra/Anxa2/Ago2/Itgb1bp1/Cfh/Prok2/Pik3c2a/Tgfa/Tgfbr3/Enpep/Zfp36l1/Prkd1/Col18a1/Prrx1/Cav1/Erap1/Gpx1/Tmem100/Pkd2/Klf4/Gadd45a/Gja1/Arhgap24/Kat6a/Rtn4/Ccn1/Hipk2/Ctsh/Aqp1/Adamts9/Prox1/Fgf2…
GO:0071867	response to monoamine	84	0.577558	2.2811	1.07929e-06	0.000240681	Drd2/Rgs9/Drd1/Htr2c/Penk/Gnal/Adcy5/Flna/Col1a2/Drd5/Htr4/Lrrk2/Htr1d/Oprm1/Rgs8/Gna12/Cav2/Sirt2/Gnai3/Pde4b/Caly/Abl1/Nsg1/Sin3a/Rnls/Tgm2
GO:0071869	response to catecholamine	84	0.577558	2.2811	1.07929e-06	0.000240681	Drd2/Rgs9/Drd1/Htr2c/Penk/Gnal/Adcy5/Flna/Col1a2/Drd5/Htr4/Lrrk2/Htr1d/Oprm1/Rgs8/Gna12/Cav2/Sirt2/Gnai3/Pde4b/Caly/Abl1/Nsg1/Sin3a/Rnls/Tgm2
GO:0048880	sensory system development	284	0.383388	1.80658	1.46446e-06	0.000313511	Drd2/Rarb/Nr4a2/Pbx3/Vim/Clic4/Sox11/Ache/Tenm3/Six3/Bcl11b/Tgfb2/Foxp2/Bmp6/Ahi1/C3/Dlx2/Chd7/Vax1/Dlx1/Meis1/Cryab/Fat1/Tmem132e/Fgfr2/Notch2/Pdgfra/Cdk4/Meis2/Cfh/Zeb1/Slc7a11/Aldh1a2/Gli3/Cdon/Slc25a25/Rbp4/Plaat3/Klf4/Gja1/Bmp7/Hmgn1/Sox2/Rcn1/Hipk2/Aqp1/Cdkn1b/Alms1/Prox1/Fgf2/Nipbl/Sp1/Bmp4/Slc17a6/Tgfbr2/Ephb1/Mdm1/Zhx2/Rpgr/Tspan12/Pou2f1/C1qa/Ret
GO:0030855	epithelial cell differentiation	403	0.344906	1.6823	1.99566e-06	0.0004108	Rarb/Tagln/Apold1/Vim/Prkch/Acta2/Pard3/Clic4/Flna/Dlx6/Hapln2/Sox11/Fa2h/Dlx5/Six3/Bcl11b/Pter/Spag6l/Btg1/Klf2/Dab2/Ednrb/Ezh2/Stc1/Pnpla1/Msn/Bmp6/Ahi1/Fndc3b/Zfp36/Txnip/Errfi1/Sox4/Ptpro/Myo6/Fstl1/Fat1/Tmem132e/Itgb1/Fgfr2/Notch2/Lats2/Hnrnph3/Kdm6b/Zeb1/Ptch1/Slc7a11/Pls1/Hsd17b4/Zfp36l1/Map7/Col18a1/Cnn3/Cav1/Tagln2/Fzd2/Vcl/Plaat3/Gpx1/Tmem100/Klf4/Tpp1/Gja1/Bmp7/Mtss1/Mycl/Sox2/Rdx/Cdkn…
GO:0009617	response to bacterium	349	0.35675	1.71619	2.25854e-06	0.000447694	Nexn/Tac1/Penk/Oprk1/Lpl/Prkcd/Gpc3/Vim/Nfkbia/Tf/Dcn/B3galt5/Ednrb/Adamts4/Colec12/Dgkb/Gas5/Bmp6/Zfp36/C3/Cnp/Timp4/Chd7/Stox2/Pros1/Fmo1/Hist1h2bq/Sparc/Pmp22/Peli1/Fgfr2/Notch2/Hmgb2/Vcam1/Cdk4/Mrc1/Oprm1/Cfh/H2bc12/Mgst1/Hmgcs2/Mpeg1/Adam17/Fos/Prkd1/Cav1/Tent5a/Resf1/Plaat3/Gpx1/Gja1/Ass1/Rpl30/Sirt2/Trim5/Cd80/Cd84/Aqp1/Adamts9/Rnf5/Bcl10/Fn1/Cd4/Adipor2/Pde4b/Akap8/Abl1/Tnnt2/Gjb6/Notch1/…
GO:1901654	response to ketone	221	0.409171	1.87677	2.47958e-06	0.000473954	Nts/Adcy5/Sfrp1/Gpx3/Sgk1/Foxo1/Pln/Plat/Mbp/Ddit4/Oxtr/Tgfb2/Klf2/Gstm2/Foxp2/Cbx3/Msn/Fbxo32/C3/Txnip/Errfi1/Tacr1/Eln/Thbs1/Sox10/A2m/Cdk4/Cd38/Hmgcs2/Tgfbr3/Fos/Cav1/Klf4/Pdxk/Ass1/Dusp1/Npm1/Aqp1/Bmp4/Fn1/Lmnb1/Akap8/Prkaa1/Rpl32/Hnrnpu/Sin3a/Pdia3/Pde5a/Igf1r/Rhoa/Adamts1/Ppp1r9b/Fdx1/Ccnd2/Bmi1/Ep300/Hnrnpd/Ube3a
GO:0007632	visual behavior	62	0.581449	2.1656	2.66705e-06	0.00049221	Nts/Drd2/Drd1/Ppp1r1b/Ap1s2/Sgk1/Pde1b/Drd5/Itgb1/Tanc1/Meis2/Slc7a11/Ptprz1
GO:0007212	dopamine receptor signaling pathway	33	0.705465	2.3175	3.22706e-06	0.000529288	Drd2/Rgs9/Drd1/Gnal/Adcy5/Flna/Drd5/Lrrk2/Oprm1/Rgs8/Gna12/Cav2/Gnai3/Caly/Nsg1
GO:0098771	inorganic ion homeostasis	459	0.331131	1.6424	3.25841e-06	0.000529288	Drd2/Drd1/Adora2a/Tac1/Htr2c/Atp6ap1l/Adcy5/Ryr3/Gpr6/Sgk1/Clic4/Tf/Pln/Lpar1/Kcnj16/Oxtr/Tgfb2/Cp/Trpc4/Ednrb/Gstm2/Stc1/Car2/Calb2/Slc12a2/Slc6a9/Trpc7/Galr1/Bmp6/Slc4a4/Ackr4/Lrrk2/Chd7/Tacr1/Inpp4b/Ca12/Pdgfra/Alas2/Oprm1/Grik2/Slc8a3/Cd38/Ddit3/Hap1/Gstm7/Smpd3/Prkd1/Cav1/Xpr1/Fzd2/Atp1b3/Tmtc4/Nr3c2/Pkd2/Atp7a/Gja1/Enpp1/Cln5/Cav2/Mtss1/Adcyap1r1/Kcna1/Fgf2/Dbi/Bmp4/Atp1b2/Trpm7/Kcnj10/Neo1…
GO:0001654	eye development	281	0.377714	1.78132	3.45153e-06	0.000529288	Drd2/Rarb/Nr4a2/Pbx3/Vim/Clic4/Sox11/Ache/Tenm3/Six3/Bcl11b/Tgfb2/Foxp2/Bmp6/Ahi1/C3/Dlx2/Chd7/Vax1/Dlx1/Meis1/Cryab/Fat1/Fgfr2/Notch2/Pdgfra/Cdk4/Meis2/Cfh/Zeb1/Slc7a11/Aldh1a2/Gli3/Cdon/Slc25a25/Rbp4/Plaat3/Klf4/Gja1/Bmp7/Hmgn1/Sox2/Rcn1/Hipk2/Aqp1/Cdkn1b/Alms1/Prox1/Fgf2/Nipbl/Sp1/Bmp4/Slc17a6/Tgfbr2/Ephb1/Mdm1/Zhx2/Rpgr/Tspan12/Pou2f1/Ret
GO:0030198	extracellular matrix organization	167	0.449275	1.97944	3.46134e-06	0.000529288	Myh11/Fmod/Nid1/Hapln2/Col1a2/Tgfb2/Abi3bp/Aebp1/Adamts4/Egfl6/Sulf1/Col1a1/Ddr1/Col3a1/Itga8/Eln/Ntng1/Itgb1/Ccn2/Pmp22/Mfap4/Mmp14/Lcp1/Pdgfra/Anxa2/Serpinh1/Smpd3/Col18a1/Cav1/Atp7a/Cav2/Ecm2/Ccn1/Ntng2/Adamts9/Ntn4/Crtapl1/Creb3l1/Spint2/Fn1/Col11a1/Phldb1/Abl1/Sfrp2/Lamc1/Adamts3/Notch1/Tmem38b/Reck/Hspg2/Adamts2
GO:0043062	extracellular structure organization	167	0.449275	1.97944	3.46134e-06	0.000529288	Myh11/Fmod/Nid1/Hapln2/Col1a2/Tgfb2/Abi3bp/Aebp1/Adamts4/Egfl6/Sulf1/Col1a1/Ddr1/Col3a1/Itga8/Eln/Ntng1/Itgb1/Ccn2/Pmp22/Mfap4/Mmp14/Lcp1/Pdgfra/Anxa2/Serpinh1/Smpd3/Col18a1/Cav1/Atp7a/Cav2/Ecm2/Ccn1/Ntng2/Adamts9/Ntn4/Crtapl1/Creb3l1/Spint2/Fn1/Col11a1/Phldb1/Abl1/Sfrp2/Lamc1/Adamts3/Notch1/Tmem38b/Reck/Hspg2/Adamts2
GO:0045229	external encapsulating structure organization	167	0.449275	1.97944	3.46134e-06	0.000529288	Myh11/Fmod/Nid1/Hapln2/Col1a2/Tgfb2/Abi3bp/Aebp1/Adamts4/Egfl6/Sulf1/Col1a1/Ddr1/Col3a1/Itga8/Eln/Ntng1/Itgb1/Ccn2/Pmp22/Mfap4/Mmp14/Lcp1/Pdgfra/Anxa2/Serpinh1/Smpd3/Col18a1/Cav1/Atp7a/Cav2/Ecm2/Ccn1/Ntng2/Adamts9/Ntn4/Crtapl1/Creb3l1/Spint2/Fn1/Col11a1/Phldb1/Abl1/Sfrp2/Lamc1/Adamts3/Notch1/Tmem38b/Reck/Hspg2/Adamts2
GO:0051272	positive regulation of cellular component movement	412	0.337497	1.65525	3.73577e-06	0.000538608	Drd1/Tac1/Sh3rf2/S100a11/Acta2/Flna/Tf/Fgf1/Lpar1/Ntn1/Igf2/Tgfb2/Gab1/Dab2/Enpp2/Col1a1/Plp1/Jam3/Mcam/Tacr1/Sema6d/Map4k4/Mylk/Jcad/Thbs1/Itgb1/Sparc/Mmp14/Ano6/Pdgfra/Syne2/Wnk1/Ago2/Itgb1bp1/Pik3c2a/Csf1/Adam17/Ptprz1/Prkd1/Col18a1/Cav1/Atp7a/Gja1/Bmp7/Trim32/Mospd2/Rdx/Rtn4/Ccn1/Ctsh/Aqp1/Rhoc/Prox1/Fgf2/Nipbl/Plpp3/Sp1/Bmp4/Fn1/Cd74/Il6st/Ackr3/Tgfbr2/Cpne3/Sema5b/Pecam1/Caly/Sema6a/Abl1/Ki…
GO:0150063	visual system development	283	0.379598	1.78928	3.77481e-06	0.000538608	Drd2/Rarb/Nr4a2/Pbx3/Vim/Clic4/Sox11/Ache/Tenm3/Six3/Bcl11b/Tgfb2/Foxp2/Bmp6/Ahi1/C3/Dlx2/Chd7/Vax1/Dlx1/Meis1/Cryab/Fat1/Fgfr2/Notch2/Pdgfra/Cdk4/Meis2/Cfh/Zeb1/Slc7a11/Aldh1a2/Gli3/Cdon/Slc25a25/Rbp4/Plaat3/Klf4/Gja1/Bmp7/Hmgn1/Sox2/Rcn1/Hipk2/Aqp1/Cdkn1b/Alms1/Prox1/Fgf2/Nipbl/Sp1/Bmp4/Slc17a6/Tgfbr2/Ephb1/Mdm1/Zhx2/Rpgr/Tspan12/Pou2f1/C1qa/Ret
GO:0043408	regulation of MAPK cascade	474	0.329894	1.64048	3.8242e-06	0.000538608	Drd2/Cartpt/Htr2c/Oprk1/Prkcd/Sh3rf2/Sfrp1/Acta2/Foxo1/Fgf1/Lpar1/Igf2/Gpr37/Tgfb2/Gab1/Dab2/Timp3/Ezh2/Cnksr3/Fzd10/Pde8a/C3/Lrrk2/Necab2/Adra2c/Errfi1/Nppa/Ptpn5/Map4k4/Jcad/Thbs1/Ccn2/Rgs2/Dcc/Fgfr2/Notch2/Alox15/Pdgfra/Oprm1/Itgb1bp1/Grik2/Grm4/Tgfa/Adam17/Cdon/Fgd4/Bnip2/Cav1/Prdx1/Ptpn11/Klf4/Gadd45a/Bmp7/Dusp1/Cav2/Mfhas1/Sox2/Trim5/Ccn1/Cd84/Hipk2/Fgf2/Pak2/Rock1/Bmp4/Fn1/Cd74/Cd4/Ackr3/D…
GO:0048545	response to steroid hormone	319	0.366688	1.75682	3.9388e-06	0.000540524	Nts/Drd1/Rxrg/Sfrp1/Gpx3/Sgk1/Foxo1/Plat/Mbp/Ddit4/Oxtr/Tgfb2/Mgp/Dab2/Stc1/Car2/Igfbp2/Cbx3/Fbxo32/Bmp6/Zfp36/C3/Col1a1/Txnip/Errfi1/Tacr1/Eln/Ccn2/Sparc/Npc1/Sox10/Hmgb2/Ptgds/A2m/Cd38/Ddx17/Hmgcs2/Fos/Sult1a1/Hsd17b4/Zfp36l1/Cav1/Nr3c2/Pdxk/Ephx1/Ass1/Bmp7/Dusp1/Dpyd/Ubr5/Hnmt/Aqp1/Abca2/Bmp4/Fn1/Kcnj10/Lmnb1/Tgfbr2/Rest/Kank2/Fkbp4/Padi2/Rpl32/Notch1/Hnrnpu/Dnaja1/Mdk/Igf1r/Zfp36l2/Rhoa
GO:0043010	camera-type eye development	249	0.392951	1.80691	4.12085e-06	0.000551369	Drd2/Rarb/Nr4a2/Vim/Clic4/Sox11/Ache/Tenm3/Six3/Bcl11b/Tgfb2/Foxp2/Ahi1/C3/Dlx2/Chd7/Vax1/Dlx1/Meis1/Cryab/Fat1/Fgfr2/Notch2/Pdgfra/Cdk4/Cfh/Zeb1/Slc7a11/Aldh1a2/Gli3/Cdon/Slc25a25/Rbp4/Plaat3/Klf4/Gja1/Bmp7/Hmgn1/Sox2/Rcn1/Hipk2/Aqp1/Cdkn1b/Alms1/Prox1/Fgf2/Sp1/Bmp4/Slc17a6/Tgfbr2/Ephb1/Mdm1/Zhx2/Rpgr/Tspan12/Pou2f1/Ret
GO:0050678	regulation of epithelial cell proliferation	230	0.397641	1.82319	4.42476e-06	0.00055205	Gpc3/Sfrp1/Dlk1/Dlx6/Fgf1/Sox11/Igf2/Dlx5/Bcl11b/Tgfb2/Dab2/Ednrb/Foxp2/Sulf1/Bmp6/Zfp36/Scg2/Errfi1/Tacr1/Jcad/Thbs1/Sparc/Fgfr2/Notch2/Hmgb2/Plxnb3/Rap1gap/Ptch1/Tgfa/Aldh1a2/Tgfbr3/Adam17/Zfp36l1/Prkd1/Cav1/Gpx1/Atp7a/Gja1/Cav2/Hmgn1/Mtss1/Sox2/Rtn4/Npm1/Cdkn1b/Prox1/Fgf2/Sp1/Bmp4/Tcf7l2/Nr2f2/Sfrp2/Lims1/Smo/Notch1/Hspg2/Mdk
GO:0071868	cellular response to monoamine stimulus	78	0.55573	2.19574	4.43538e-06	0.00055205	Drd2/Rgs9/Drd1/Htr2c/Gnal/Adcy5/Flna/Drd5/Htr4/Lrrk2/Htr1d/Oprm1/Rgs8/Gna12/Cav2/Sirt2/Gnai3/Pde4b/Caly/Nsg1/Sin3a/Tgm2
GO:0071870	cellular response to catecholamine stimulus	78	0.55573	2.19574	4.43538e-06	0.00055205	Drd2/Rgs9/Drd1/Htr2c/Gnal/Adcy5/Flna/Drd5/Htr4/Lrrk2/Htr1d/Oprm1/Rgs8/Gna12/Cav2/Sirt2/Gnai3/Pde4b/Caly/Nsg1/Sin3a/Tgm2
GO:0050673	epithelial cell proliferation	269	0.379126	1.7728	5.29704e-06	0.000633593	Gpc3/Mki67/Sfrp1/Dlk1/Dlx6/Fgf1/Sox11/Igf2/Dlx5/Bcl11b/Tgfb2/Dab2/Ednrb/Foxp2/Sulf1/Bmp6/Zfp36/Scg2/Fabp7/Errfi1/Tacr1/Jcad/Thbs1/Sparc/Mmp14/Fgfr2/Notch2/Hmgb2/Plxnb3/Rap1gap/Itgb1bp1/Prok2/Ptch1/Tgfa/Aldh1a2/Tgfbr3/Adam17/Zfp36l1/Prkd1/Cav1/Gpx1/Lgr5/Atp7a/Gja1/Cav2/Hmgn1/Mtss1/Sox2/Rtn4/Npm1/Cdkn1b/Alms1/Prox1/Fgf2/Prkx/Sp1/Bmp4/Tcf7l2
GO:2000147	positive regulation of cell motility	399	0.343282	1.67338	5.3273e-06	0.000633593	Drd1/Tac1/Sh3rf2/S100a11/Acta2/Flna/Tf/Fgf1/Lpar1/Ntn1/Igf2/Tgfb2/Gab1/Dab2/Enpp2/Col1a1/Plp1/Jam3/Mcam/Tacr1/Sema6d/Map4k4/Mylk/Jcad/Thbs1/Itgb1/Sparc/Mmp14/Ano6/Pdgfra/Syne2/Wnk1/Ago2/Itgb1bp1/Pik3c2a/Csf1/Adam17/Ptprz1/Prkd1/Col18a1/Cav1/Atp7a/Gja1/Bmp7/Trim32/Mospd2/Rdx/Rtn4/Ccn1/Ctsh/Aqp1/Rhoc/Prox1/Fgf2/Nipbl/Plpp3/Sp1/Bmp4/Fn1/Cd74/Il6st/Ackr3/Tgfbr2/Cpne3/Sema5b/Pecam1/Sema6a/Abl1/Kitlg/S…
GO:0030335	positive regulation of cell migration	388	0.343846	1.67301	5.87727e-06	0.000683808	Drd1/Tac1/Sh3rf2/S100a11/Acta2/Flna/Fgf1/Lpar1/Igf2/Tgfb2/Gab1/Dab2/Enpp2/Col1a1/Plp1/Jam3/Mcam/Tacr1/Sema6d/Map4k4/Mylk/Jcad/Thbs1/Itgb1/Sparc/Mmp14/Ano6/Pdgfra/Syne2/Wnk1/Ago2/Itgb1bp1/Pik3c2a/Csf1/Adam17/Ptprz1/Prkd1/Col18a1/Cav1/Atp7a/Gja1/Bmp7/Trim32/Mospd2/Rdx/Rtn4/Ccn1/Ctsh/Aqp1/Rhoc/Prox1/Fgf2/Nipbl/Plpp3/Sp1/Bmp4/Fn1/Cd74/Il6st/Ackr3/Tgfbr2/Cpne3/Sema5b/Pecam1/Sema6a/Abl1/Kitlg/Smurf2/Cs…
GO:0001525	angiogenesis	322	0.355479	1.70109	6.41431e-06	0.000717481	Apold1/Nrp2/Clic4/Flna/Dcn/Fgf1/Igf2/Tgfb2/Btg1/Klf2/Gab1/Slc12a2/Sulf1/Enpp2/Thbs2/Prcp/C3/Scg2/Jam3/Mcam/Cald1/Meis1/Jcad/Thbs1/Itgb1/Ccn2/Sparc/Nfatc3/Mmp14/Fgfr2/Notch2/Pdgfra/Anxa2/Ago2/Itgb1bp1/Cfh/Prok2/Pik3c2a/Tgfa/Enpep/Prkd1/Col18a1/Cav1/Erap1/Gpx1/Tmem100/Klf4/Gadd45a/Arhgap24/Rtn4/Ccn1/Hipk2/Ctsh/Aqp1/Adamts9/Fgf2/Rock1/Prkx/Creb3l1/Sp1/Bmp4/Fn1/Ackr3/Tgfbr2/Adipor2/Ephb1/Stard13/Itgb…
GO:0043410	positive regulation of MAPK cascade	332	0.35338	1.69826	6.4348e-06	0.000717481	Drd2/Cartpt/Htr2c/Oprk1/Prkcd/Sh3rf2/Acta2/Fgf1/Lpar1/Igf2/Gpr37/Tgfb2/Gab1/Dab2/Ezh2/Fzd10/Pde8a/C3/Lrrk2/Necab2/Adra2c/Map4k4/Jcad/Thbs1/Ccn2/Dcc/Fgfr2/Notch2/Alox15/Pdgfra/Oprm1/Grm4/Tgfa/Adam17/Cdon/Fgd4/Bnip2/Ptpn11/Gadd45a/Cav2/Mfhas1/Sox2/Trim5/Cd84/Hipk2/Fgf2/Rock1/Bmp4/Cd74/Cd4/Ackr3/Dusp15/Klhdc10/Abl1/Axin1/Grm5/Kitlg/Tnik/Csf1r/Slc30a10/Pdgfc/Notch1/C1qtnf1/Fermt2/Ret/Mid1/Gpnmb/Pde5a…
GO:0009410	response to xenobiotic stimulus	409	0.335139	1.64035	7.16759e-06	0.000782877	Drd2/Drd1/Adora2a/Htr2c/Slc10a4/Lpl/Prkcd/Sfrp1/Gpx3/Igf2/Gad2/Oxtr/Apod/Tgfb2/Ppp1r14a/Vav3/Gstm2/Igfbp2/Erbb3/Col1a1/Txnip/Timp4/Ptpn5/Myo6/Mylk/Eln/Fmo1/Thbs1/Gad1/Itgb1/Gpr52/Npc1/Sox10/Cdk4/Alas2/Bag1/Cd38/Mat2a/Pde3a/Ptch1/Ddit3/Tgfa/Mgst1/Hmgcs2/Gstm7/Adam17/Fos/Sult1a1/Hsd17b4/Col18a1/Cav1/Gna12/Gpx1/Pdxk/Ass1/Plin2/Dpyd/Adcyap1r1/Qdpr/Cdkn1b/Abat/Gabrg3/Fn1/Lmnb1/Hadha/Tgfbr2/Adipor2/Res…
GO:0055080	cation homeostasis	453	0.327422	1.61741	7.68738e-06	0.000822857	Drd2/Drd1/Adora2a/Tac1/Htr2c/Atp6ap1l/Adcy5/Ryr3/Gpr6/Sgk1/Clic4/Tf/Pln/Lpar1/Kcnj16/Oxtr/Tgfb2/Cp/Trpc4/Ednrb/Gstm2/Stc1/Car2/Calb2/Slc12a2/Slc6a9/Trpc7/Galr1/Bmp6/Slc4a4/Ackr4/Lrrk2/Chd7/Tacr1/Inpp4b/Pdgfra/Alas2/Oprm1/Grik2/Slc8a3/Cd38/Ddit3/Hap1/Gstm7/Smpd3/Prkd1/Cav1/Fzd2/Atp1b3/Tmtc4/Nr3c2/Pkd2/Atp7a/Gja1/Cln5/Cav2/Mtss1/Adcyap1r1/Kcna1/Fgf2/Dbi/Bmp4/Atp1b2/Trpm7/Kcnj10/Neo1/Il6st/Cd4/Ackr3…
GO:0043279	response to alkaloid	139	0.448074	1.90865	8.53485e-06	0.000895657	Nts/Drd2/Drd1/Adora2a/Tac1/Penk/Gnal/Ppp1r1b/Oprk1/Adcy5/Oxtr/Drd5/Gstm2/Tacr1/Srsf9/Spidr/Sdc2/Oprm1/Gstm7/Nefh/Hnmt/Dhx15/Abat/Cacng4
GO:0008542	visual learning	60	0.583824	2.16037	8.91456e-06	0.000917514	Nts/Drd2/Drd1/Ppp1r1b/Ap1s2/Sgk1/Pde1b/Drd5/Itgb1/Tanc1/Meis2/Slc7a11/Ptprz1
GO:0050878	regulation of body fluid levels	209	0.402063	1.82618	9.44181e-06	0.000953445	Drd2/Adora2a/Tac1/Oprk1/Prkcd/Flna/Fa2h/Myl9/Cd9/Cp/Csrp1/Ednrb/Serping1/Pnpla1/Elovl1/C3/Adra2c/Ddr1/Tsc22d3/Tacr1/Nppa/Ptpro/Enpp4/Pros1/Thbs1/Ano6/Pdgfra/Wnk1/Alas2/Anxa2/Cfh/Papss2/Slc7a11/Prkcq/Cav1/Vcl/Atp7a/Gja1/Stxbp3/Aqp1/Dbi/Abat/Fn1
GO:0021544	subpallium development	25	0.735951	2.25543	1.0195e-05	0.000999991	Drd2/Drd1/Rarb/Bcl11b/Foxp2/Lrrk2/Dlx2/Dlx1/Slc7a11/Gli3/Enpp1
GO:0031099	regeneration	209	0.400865	1.82074	1.02764e-05	0.000999991	Htr2c/Kremen1/Mki67/Vim/Flna/Nfkbia/Mag/Ninj2/Gsn/Apod/Cd9/Timp3/Ezh2/Jam3/Rgma/Ddr1/Map4k4/Gatm/Lcp1/Notch2/Hmgb2/Cdk4/Alas2/Inpp5f/Vcan/Cers2/Ptch1/Tgfbr3/Gli3/Adam17/Prkcq/Prrx1/Cav1/Gpx1/Klf4/Gja1/Ybx3/Rpl30/Sox2/Nefh/Rtn4/Npm1/Cdkn1b/Neo1/Tgfbr2/Rps16/Naca/Mustn1/Rpl32/Smo/Notch1/Pou2f1/Hspg2/Mdk/Igf1r
GO:0014003	oligodendrocyte development	49	0.607737	2.16162	1.06126e-05	0.00101248	Myrf/Lpar1/Sox11/Mag/Mobp/Fa2h/Gsn/Cd9/Plp1/Id4/Aspa/Olig1/Sox10/Nkx6-2/Abca2/Tcf7l2/Kcnj10
GO:0035812	renal sodium excretion	13	0.85663	2.21348	1.09723e-05	0.00101248	Drd2/Adora2a/Tac1/Ednrb/Tacr1
GO:0035813	regulation of renal sodium excretion	13	0.85663	2.21348	1.09723e-05	0.00101248	Drd2/Adora2a/Tac1/Ednrb/Tacr1
GO:0061458	reproductive system development	328	0.346379	1.66013	1.12364e-05	0.00101927	Gfra1/Gpr149/Sfrp1/Vim/Mme/Flna/Dcn/Igf2/Six3/Tppp3/Tgfb2/Gab1/Gjb1/Stc1/Sulf1/Bmp6/C3/Crip1/Id4/Chd7/Stox2/Tiparp/Itgb1/Lhx8/Mmp14/Fgfr2/Notch2/Hmgb2/Vcam1/Pdgfra/A2m/Ptch1/Ddit3/Mgst1/Gli3/Alkbh1/Hsd17b4/Zfp36l1/Map7/Dazap1/Rbp4/Ptpn11/Pkd2/Gja1/Ybx3/Bmp7/Sox2/Nefh/Ccn1/Cdkn1b/Nipbl/Akap9/Sp1/Bmp4/Spint2/Tcf7l2/Hnrnpa1/Kdm5a/Nr2f2/Fkbp4/Pbrm1/Kitlg/Sfrp2/Arid4a/Notch1/Fndc3a/Igf1r/Adamts1/Palld…
GO:0044062	regulation of excretion	15	0.841585	2.24707	1.28233e-05	0.00114384	Drd2/Adora2a/Tac1/Ednrb/Stc1/Tacr1
GO:0007218	neuropeptide signaling pathway	50	0.612043	2.16964	1.51749e-05	0.00133141	Nts/Cartpt/Ecel1/Tac1/Penk/Oprk1/Gpr149/Gpr165/Pdyn/Gpr37/Nmbr/Glra2/Galr1/Gpr139/Tacr1/Nppa/Oprm1/Prok2
GO:0060537	muscle tissue development	302	0.356147	1.68855	1.64398e-05	0.00139726	Rarb/Myh11/Rxrg/Dcn/Pln/Sox11/Igf2/Tgfb2/Sik1/Actn2/Csrp1/Foxp2/Erbb3/Chd7/Col3a1/Tsc22d3/Nppa/Vax1/Itga8/Mylk/Meis1/Eln/Tiparp/Itgb1/Ifitm3/Rgs2/Pmp22/Nfatc3/Fgfr2/Pdgfra/Dner/Kdm6b/Ptch1/Ddx17/Aldh1a2/Tgfbr3/Cdon/Fos/Rbp4/Cav1/Gpx1/Kcnab1/Pkd2/Kcnk2/Gja1/Ybx3/Bmp7/Cav2/Sirt2/Megf10/Marcks/Adamts9/Prox1/Fgf2/Svil/Tomm70/Bmp4/Col11a1/Tcf7l2/Cacybp/Tgfbr2/Sgce/Ephb1/Prkaa1/Nr2f2/Foxn2/Naca/Tnnt2/A…
GO:0022010	central nervous system myelination	23	0.752558	2.26125	1.67087e-05	0.00139726	Myrf/Mag/Mobp/Fa2h/Plp1/Id4/Aspa/Sox10/Nkx6-2/Abca2/Kcnj10
GO:0032291	axon ensheathment in central nervous system	23	0.752558	2.26125	1.67087e-05	0.00139726	Myrf/Mag/Mobp/Fa2h/Plp1/Id4/Aspa/Sox10/Nkx6-2/Abca2/Kcnj10
GO:0055065	metal ion homeostasis	408	0.327294	1.60079	1.92624e-05	0.00158604	Drd2/Drd1/Adora2a/Tac1/Htr2c/Adcy5/Ryr3/Gpr6/Sgk1/Tf/Pln/Lpar1/Oxtr/Tgfb2/Cp/Trpc4/Ednrb/Gstm2/Stc1/Calb2/Slc12a2/Slc6a9/Trpc7/Galr1/Bmp6/Ackr4/Chd7/Tacr1/Inpp4b/Pdgfra/Alas2/Oprm1/Grik2/Slc8a3/Cd38/Ddit3/Hap1/Gstm7/Smpd3/Prkd1/Cav1/Fzd2/Atp1b3/Tmtc4/Nr3c2/Pkd2/Atp7a/Gja1/Cav2/Mtss1/Adcyap1r1/Kcna1/Fgf2/Dbi/Bmp4/Atp1b2/Trpm7/Kcnj10/Neo1/Il6st/Cd4/Ackr3/Picalm/Cybrd1/Pdzd8/Kcna5/Abl1/Grm5/Atg5/Slc…
GO:0030155	regulation of cell adhesion	465	0.321253	1.59033	2.21688e-05	0.00178148	Adora2a/Arhgap6/Prkcd/Flna/Nid1/Igf2/Mbp/Gsn/Tenm3/Apod/Tgfb2/Abi3bp/Cd9/Vav3/Dab2/Egfl6/Igfbp2/Enpp2/Bmp6/Efnb3/Erbb3/Col1a1/Jam3/Ddr1/Kank1/Sox4/Map4k4/Efnb1/Ap1ar/Thbs1/Itgb1/Lrrc32/Mmp14/Peli1/Net1/Alox15/Plxnb3/Vcam1/Wnk1/Rap1gap/Itgb1bp1/Csf1/Mdga1/Gli3/Tmem131l/Prkcq/Ptprz1/Cav1/Vcl/Chst2/Ptpn11/Klf4/Ass1/Bmp7/Lmo7/Dusp1/Ecm2/Sox2/Rdx/Megf10/Ccn1/Cd80/Bcl10/Plpp3/Abat/Rock1/Prkx/Bmp4/Spint…
GO:0007189	adenylate cyclase-activating G protein-coupled receptor signaling pathway	88	0.505786	2.02078	2.23018e-05	0.00178148	Drd2/Drd1/Gpr101/Adora2a/Gnal/Adcy5/Gpr6/Pde10a/Pln/Lpar1/Drd5/Adgrg6/Htr4/S1pr5/Galr1/Adra2c/Arrdc3/Oprm1
GO:0008015	blood circulation	329	0.342016	1.64053	2.41396e-05	0.00189993	Drd2/Cartpt/Drd1/Adora2a/Tac1/Htr2c/Scn4b/Cacna2d2/Asb15/Acta2/Pln/Gsn/Col1a2/Oxtr/Tgfb2/Drd5/Klf2/Ednrb/Stc1/Bmp6/Prcp/Gaa/Adra2c/Chd7/Kcnmb1/Tacr1/Nppa/Kat2b/Ptpro/Htr1d/Ccn2/Rgs2/Arhgap42/Wnk1/Itgb1bp1/Cd38/Pde3a/Enpep/Smpd3/Prkcq/Sult1a1/Cav1/Gna12/Erap1/Gpx1/Gja1/Tjp2/Abat/Gucy1a1/Akap9/Rock1/Smad5/Scpep1/Pde4b/Nr2f2/Kcna5/Abl1/Tnnt2/Atg5/Kcnj2/Sod2/Fermt2/Sp4/Tmem38b/Ctnna3/Fxyd1/Rnls/Pde5a
GO:0008306	associative learning	100	0.479584	1.95217	2.59208e-05	0.00201055	Nts/Drd2/Drd1/Tac1/Ppp1r1b/Oprk1/Ap1s2/Sgk1/Pde1b/Drd5/Tacr1/Itgb1/Tanc1/Meis2/Slc7a11/Fos/Ptprz1
GO:0035418	protein localization to synapse	78	-0.520268	-1.95013	2.72658e-05	0.00208467	Mapt/Klc1/Shank1/Magi2/Nlgn3/Prkcz/Rapgef4/Dlg4/Baiap2/Arhgap44/Grin1/Zdhhc2/Homer1/LRRTM1/Mapk8ip3/Pclo/Git1/Iqsec2/Camk2a/Bsn/Cdk5/Kalrn/Mapk10/Gpc6/Cacng2/Stx3/Nptx1/Clstn1/Snap47/Lgi1/Grin2a/Nptx2/Nptxr/Dlgap1/Cnih3/Reln/Cacng3/Asic2/Tamalin
GO:0055078	sodium ion homeostasis	28	0.710657	2.23572	3.3324e-05	0.00247788	Drd2/Adora2a/Tac1/Sgk1/Ednrb/Slc12a2/Tacr1/Atp1b3/Nr3c2/Atp1b2
GO:0001667	ameboidal-type cell migration	311	0.347149	1.65308	3.33347e-05	0.00247788	Tac1/Nrp2/Gpc3/Acta2/Anln/Dcn/Fgf1/Igf2/Tgfb2/Spag6l/Timp1/Ednrb/Stc1/Enpp2/Prcp/Tns1/Kank1/Tacr1/Sema6d/Map4k4/Fstl1/Efnb1/Jcad/Thbs1/Itgb1/Sparc/Pmp22/Sox10/Syne2/Ago2/Itgb1bp1/Rffl/Pik3c2a/Tgfbr3/Adam17/Prkd1/Gna12/Ptpn11/Gpx1/Klf4/Gadd45a/Gja1/Bmp7/Rtn4/Ctsh/Aqp1/Adamts9/Prox1/Fgf2/Plpp3/Rock1/Prkx/Sp1/Bmp4/Fn1/Tgfbr2/Cd63/Adipor2/Stard13/Sema5b/Nr2f2/Pecam1/Megf8/Kank2/Sema6a/Abl1/Kitlg/Smur…
GO:0097305	response to alcohol	265	0.366852	1.71034	3.39164e-05	0.00248658	Nts/Drd2/Drd1/Penk/Oprk1/Adcy5/Prkcd/Sfrp1/Gpx3/Sgk1/Nfkbia/Igf2/Gsn/Glra2/Klf2/Kcnmb1/Tacr1/Spidr/Rgs2/Sparc/Fgfr2/Vcam1/A2m/Cdk4/Oprm1/Ptch1/Hmgcs2/Tgfbr3/Fos/Rbp4/Klf4/Adcyap1r1/Abca2/Rps4x/Abat/Fn1/Lmnb1/Tgfbr2/Adipor2/Akap8/Prkaa1/Ggh
GO:0010038	response to metal ion	356	0.331314	1.59888	3.64141e-05	0.00263363	Nts/Drd2/Penk/Rasgrp2/Vim/Clic4/Tf/Pln/Mbp/Gsn/Syt2/Glra2/Mgp/Syt9/Cp/Nt5e/Gstm2/Car2/Slc12a2/Igfbp2/Enpp2/Slc25a13/Bmp6/C3/Lrrk2/Crip1/Txnip/Kcnmb1/Mylk/Eln/Thbs1/Sparc/Gatm/Nfatc3/Npc1/Alox15/Vcam1/Cdk4/Wnk1/Alas2/Bag1/Ddit3/Hmgcs2/Alox5ap/Fos/Smpd3/Cav1/Pkd2/Atp7a/Ass1/Dusp1/Adgrv1/Syt6/Qdpr/Sox2/Kcna1/Aqp1/Cdkn1b/Abat/Lta4h/Fn1/Cacybp/Hnrnpa1/Cpne3/Prkaa1/Cybrd1/Ggh/Tnnt2/Syt10/Atg5/Slc30a10/…
GO:0031667	response to nutrient levels	425	0.31726	1.56371	3.88744e-05	0.00277407	Cartpt/Drd1/Htr2c/Penk/Lpl/Prkcd/Rbp1/Sfrp1/Vim/Foxo1/Mog/Igf2/Gsn/Tgfb2/Mgp/Sik1/Cp/Timp3/Htr4/Stc1/Igfbp2/Ahi1/Zfp36/Col1a1/Lrrk2/Eln/Itgb1/Sparc/Gatm/Vcam1/A2m/Oprm1/Cfh/Pik3c2a/Zeb1/Ddit3/Aldh1a2/Hmgcs2/Folr2/Pik3c2b/Prkd1/Slc25a25/Bnip2/Cav1/Lamp2/Xpr1/Fzd2/Gpx1/Pdxk/Ass1/Bmp7/Dpyd/Sirt2/Rpl26/Tnrc6a/Prox1/Dbi/Tnks/Bcl10/Tcf7l2/Fads1/Nucb2/Il6st/Cd4/Hnrnpa1/Tgfbr2/Adipor2/Slc16a1/Sesn3/Prkaa…
GO:0098609	cell-cell adhesion	484	0.311297	1.54617	4.37938e-05	0.003084	Adora2a/Nexn/Prkcd/Flna/Ntn1/Mag/Igf2/Mbp/Tenm3/Myl9/Tgfb2/Cd9/Csrp1/Nt5e/Igfbp2/Msn/Cldn11/Bmp6/Efnb3/Jam3/Sox4/Cdh9/Efnb1/Cdhr1/Fat1/Thbs1/Ntng1/Itgb1/Unc5d/Lrrc32/Peli1/Alox15/Plxnb3/Vcam1/Pdgfra/Wnk1/Rap1gap/Cdh7/Cfh/Dchs1/Mdga1/Slc7a11/Pkp4/Gli3/Tmem131l/Prkcq/Alcam/Zfp36l1/Cav1/Vcl/Chst2/Klf4/Ass1/Bmp7/Cd164/Sox2/Rdx/Megf10/Ccn1/Cd80/Ntng2/Stxbp3/Tjp2/Bcl10/Plpp3/Abat/Pcdh17/Rock1/Bmp4/Spin…
GO:0048729	tissue morphogenesis	424	0.322668	1.59044	4.70838e-05	0.00327263	Hhip/Nrp2/Gpc3/Sfrp1/Acta2/Pard3/Clic4/Flna/Fgf1/Ntn1/Sox11/Six3/Tgfb2/Mgp/Zic2/Spag6l/Dab2/Stc1/Car2/Slc12a2/Msn/Sulf1/Ahi1/Id4/Rgma/Ddr1/Chd7/Col3a1/Sox4/Itga8/Mylk/Fat1/Itgb1/Nfatc3/Mmp14/Fgfr2/Sox10/Notch2/Pdgfra/Dchs1/Csf1/Ccdc39/Kdm6b/Enah/Ptch1/Aldh1a2/Tgfbr3/Gli3/Adam17/Fzd2/Vcl/Tmem100/Pkd2/Klf4/Lgr5/Atp7a/Gja1/Bmp7/Arhgap24/Mtss1/Sox2/Ccn1/Ctsh/Alms1/Rhoc/Ntn4/Prox1/Fgf2/Bcl10/Zic5/Prkx…
GO:0007507	heart development	455	0.314322	1.55477	5.30693e-05	0.00357678	Rarb/Adcy5/Myh11/Rxrg/Nrp2/Gpc3/Flna/Pln/Sox11/Oxtr/Tgfb2/Abi3bp/Sik1/Actn2/Adgrg6/Gab1/Erbb3/Ahi1/Gaa/Chd7/Col3a1/Sox4/Nppa/Meis1/Eln/Thbs1/Itgb1/Ifitm3/Rgs2/Sparc/Nfatc3/Fgfr2/Notch2/Vcam1/Pdgfra/Vcan/Dchs1/Ifitm2/Ccdc39/Kdm6b/Ptch1/Aldh1a2/Tgfbr3/Gli3/Zfp36l1/Rbp4/Fzd2/Ptpn11/Tmem100/Kcnab1/Pkd2/Gng5/Kcnk2/Gja1/Bmp7/Bicc1/Kat6a/Rtn4/Ccn1/Marcks/Adamts9/Cdkn1b/Prox1/Fgf2/Nipbl/Tomm70/Rock1/Bmp4…
GO:0009991	response to extracellular stimulus	442	0.31829	1.56444	5.31458e-05	0.00357678	Cartpt/Drd1/Htr2c/Penk/Lpl/Nr4a2/Prkcd/Rbp1/Sfrp1/Vim/Foxo1/Mog/Igf2/Gsn/Tgfb2/Mgp/Sik1/Cp/Timp3/Htr4/Stc1/Igfbp2/Ahi1/Zfp36/Col1a1/Lrrk2/Eln/Itgb1/Sparc/Gatm/Vcam1/A2m/Oprm1/Cfh/Pik3c2a/Zeb1/Ddit3/Aldh1a2/Hmgcs2/Folr2/Fos/Pik3c2b/Prkd1/Slc25a25/Bnip2/Cav1/Lamp2/Xpr1/Fzd2/Gpx1/Pdxk/Ass1/Bmp7/Dpyd/Sirt2/Rpl26/Tnrc6a/Prox1/Dbi/Tnks/Bcl10/Tcf7l2/Fads1/Nucb2/Il6st/Cd4/Hnrnpa1/Tgfbr2/Adipor2/Slc16a1/S…
GO:0009612	response to mechanical stimulus	213	0.377854	1.71814	5.34646e-05	0.00357678	Drd2/Oprk1/Prkcd/Nfkbia/Dcn/Mag/Igf2/Gsn/Mgp/Timp3/Slc12a2/Igfbp2/Foxp2/Bmp6/Col1a1/Txnip/Col3a1/Tacr1/Nppa/Thbs1/Itgb1/Afap1/Mmp14/Meis2/Ptch1/Smpd2/Fos/Cav1/Bag3/Ptpn11/Pkd2/Gadd45a/Kcnk2/Gja1/Enpp1/Adgrv1/Sox2/Kcna1/Aqp1/Bcl10/Bmp4/Col11a1/Tgfbr2/Rest/Kcna5/Mbd2/Kcnj2/Mdk/Igf1r/Rhoa/Jun/Xpa/Arhgdia/Tlr3/Entpd1/Ripor2/Slc8a1/Atp1a2/Pkd1/Eng/Slc38a2/Stra6
GO:0006873	cellular ion homeostasis	412	0.320119	1.57002	5.50144e-05	0.00363502	Drd2/Drd1/Tac1/Htr2c/Atp6ap1l/Adcy5/Ryr3/Gpr6/Sgk1/Clic4/Tf/Pln/Lpar1/Oxtr/Tgfb2/Cp/Trpc4/Ednrb/Gstm2/Stc1/Car2/Calb2/Slc12a2/Slc6a9/Trpc7/Galr1/Bmp6/Slc4a4/Ackr4/Lrrk2/Chd7/Tacr1/Inpp4b/Pdgfra/Alas2/Oprm1/Grik2/Slc8a3/Cd38/Ddit3/Hap1/Gstm7/Smpd3/Prkd1/Cav1/Xpr1/Fzd2/Atp1b3/Tmtc4/Nr3c2/Pkd2/Atp7a/Gja1/Enpp1/Cln5/Cav2/Adcyap1r1/Fgf2/Dbi/Bmp4/Atp1b2/Trpm7/Il6st/Cd4/Ackr3/Cybrd1/Pdzd8/Kcna5/Abl1/Grm…
GO:0055067	monovalent inorganic cation homeostasis	92	0.492594	1.98209	6.52475e-05	0.00425859	Drd2/Adora2a/Tac1/Atp6ap1l/Sgk1/Clic4/Kcnj16/Ednrb/Car2/Slc12a2/Slc4a4/Lrrk2/Tacr1/Atp1b3/Nr3c2/Cln5/Atp1b2/Kcnj10
GO:0009416	response to light stimulus	252	0.358997	1.65526	6.64102e-05	0.00428226	Nts/Drd2/Rgs9/Drd1/Ppp1r1b/Prkcd/Ap1s2/Gpr88/Sgk1/Mme/Pde1b/Sik1/Drd5/Timp1/Crip1/Itgb1/Mfap4/Tanc1/Meis2/Mat2a/Slc7a11/Fos/Ptprz1/Rbp4/Uaca/Gpx1/Dusp1/Hmgn1/Trim32/Pde8b/Npm1/Aqp1/Rpl26/Kcnj10/Ppp1cc/Sema5b/Prkaa1
GO:0048608	reproductive structure development	325	0.346404	1.6575	6.74577e-05	0.00429207	Gfra1/Gpr149/Sfrp1/Vim/Mme/Flna/Dcn/Igf2/Six3/Tppp3/Tgfb2/Gab1/Gjb1/Stc1/Sulf1/Bmp6/C3/Crip1/Id4/Chd7/Stox2/Tiparp/Itgb1/Lhx8/Mmp14/Fgfr2/Notch2/Hmgb2/Vcam1/Pdgfra/A2m/Ptch1/Ddit3/Mgst1/Gli3/Alkbh1/Hsd17b4/Zfp36l1/Map7/Dazap1/Rbp4/Ptpn11/Pkd2/Gja1/Ybx3/Bmp7/Sox2/Nefh/Ccn1/Cdkn1b/Nipbl/Akap9/Sp1/Bmp4/Spint2/Tcf7l2/Hnrnpa1/Kdm5a/Nr2f2/Fkbp4/Pbrm1/Kitlg/Sfrp2/Arid4a/Notch1/Fndc3a/Igf1r/Adamts1/Palld…
GO:0030003	cellular cation homeostasis	407	0.318498	1.56074	6.81664e-05	0.00429207	Drd2/Drd1/Tac1/Htr2c/Atp6ap1l/Adcy5/Ryr3/Gpr6/Sgk1/Clic4/Tf/Pln/Lpar1/Oxtr/Tgfb2/Cp/Trpc4/Ednrb/Gstm2/Stc1/Car2/Calb2/Slc12a2/Slc6a9/Trpc7/Galr1/Bmp6/Slc4a4/Ackr4/Lrrk2/Chd7/Tacr1/Inpp4b/Pdgfra/Alas2/Oprm1/Grik2/Slc8a3/Cd38/Ddit3/Hap1/Gstm7/Smpd3/Prkd1/Cav1/Fzd2/Atp1b3/Tmtc4/Nr3c2/Pkd2/Atp7a/Gja1/Cln5/Cav2/Adcyap1r1/Fgf2/Dbi/Bmp4/Atp1b2/Trpm7/Il6st/Cd4/Ackr3/Cybrd1/Pdzd8/Kcna5/Abl1/Grm5/Atg5/Slc3…
GO:0001503	ossification	275	0.352951	1.65826	6.90356e-05	0.00429626	Tac1/Penk/Kremen1/Gpc3/Sfrp1/Dlk1/Sox11/Ache/Igf2/Dlx5/Col1a2/Tgfb2/Mgp/Stc1/Pcp4/Bmp6/Fndc3b/Col1a1/Id4/Tacr1/Ccn2/Sparc/Mmp14/Fgfr2/Ano6/Alox15/Dchs1/Hist1h4b/Csf1/Ptch1/Tgfbr3/Gli3/Smpd3/Prkd1/Ptpn11/Gja1/Bmp7/Enpp1/Mtss1/Adgrv1/Sox2/Ccn1/Fgf2/Nipbl/Creb3l1/Sp1/Bmp4/Fn1/Col11a1/Tcf7l2/Smad5/Mesd/Il6st/Rest/Zhx3/Sfrp2/Tmsb4x/Smo/Notch1/Fermt2/Tmem38b/Hspg2/Gpnmb/Mdk/Slc26a2/Rhoa/Sema4d/Zmpste24…
GO:0032870	cellular response to hormone stimulus	486	0.297656	1.47911	7.09663e-05	0.00436157	Nts/Drd1/Lpl/Rarb/Nr4a2/Rxrg/Prkcd/Sfrp1/Sgk1/Foxo1/Tf/Plat/Igf2/Ddit4/Col1a2/Actn2/Dab2/Stc1/Car2/Igfbp2/Cbx3/Fbxo32/Erbb3/Prcp/Zfp36/Errfi1/Kank1/Kat2b/Eln/Npc1/Sox10/Cdk4/Lats2/Inpp5f/Ddx17/Hmgcs2/Fos/Prkcq/Zfp36l1/Wdr6/Cav1/Fzd2/Ptpn11/Nr3c2/Ephx1/Lgr5/Gja1/Ass1/Bmp7/Enpp1/Dusp1/Cav2/Ubr5/Rdx/Mtus1/Marcks/Ctsh/Aqp1/Rock1/Sp1/Bmp4/Fn1/Lmnb1/Nucb2/Adipor2/Rest/Cacna2d3/Akap8/Sesn3/Prkaa1/Kank2/…
GO:0043086	negative regulation of catalytic activity	466	0.309813	1.53399	7.17149e-05	0.00436157	Drd2/Drd1/Adora2a/Ppp1r1b/Prkcd/Spock3/Sh3rf2/Gpc3/Sfrp1/Pln/Tgfb2/Ppp1r14a/Drd5/Lxn/Timp1/Serping1/Timp3/Fzd10/Pcp4/Galr1/Zfp36/C3/Lrrk2/Txnip/Timp4/Errfi1/Ppp1r2/Nppa/Kat2b/Ptpn5/Ptpro/Cryab/Thbs1/Rgs2/Apoc1/Tmbim1/Plxnb3/A2m/Lats2/Wnk1/Anxa2/Itgb1bp1/Rffl/Slc8a3/Serpinh1/Cnn3/Cav1/Gpx1/Klf4/Gadd45a/Bmp7/Dusp1/Adgrv1/Rdx/Npm1/Rrp1b/Aqp1/Cdkn1b/Pak2/Akap9/Rock1/Bmp4/Spint2/Picalm/Kdm5a/Nr2f2/Pec…
GO:0061061	muscle structure development	436	0.311762	1.53449	7.32105e-05	0.0044025	Rarb/Myh11/Rxrg/Cacna2d2/Kremen1/Dcn/Sox11/Igf2/Tgfb2/Sik1/Cd9/Actn2/Csrp1/Btg1/Ednrb/Ezh2/Foxp2/Erbb3/C3/Chd7/Col3a1/Tsc22d3/Nppa/Vax1/Itga8/Mylk/Cryab/Eln/Itgb1/Ifitm3/Rgs2/Pmp22/Nfatc3/Tanc1/Mmp14/Fgfr2/Myt1/Pdgfra/Ehd2/Cfh/Dner/Bhlhe41/Atp11a/Kdm6b/Cmtm5/Zeb1/Ddit3/Ddx17/Tgfbr3/Cdon/Fos/Zfp36l1/Bnip2/Cav1/Fzd2/Gpx1/Kcnab1/Gja1/Ybx3/Ass1/Cd164/Cav2/Trim32/Sirt2/Fxr1/Megf10/Prox1/Tmod3/Svil/Tom…
GO:0007162	negative regulation of cell adhesion	178	0.398082	1.77731	7.68708e-05	0.00457125	Adora2a/Arhgap6/Prkcd/Mbp/Apod/Cd9/Enpp2/Bmp6/Erbb3/Col1a1/Jam3/Kank1/Ap1ar/Thbs1/Lrrc32/Mmp14/Peli1/Plxnb3/Wnk1/Itgb1bp1/Gli3/Tmem131l/Ptprz1/Ptpn11/Klf4/Ass1/Dusp1/Rdx/Cd80/Abat/Bmp4/Spint2/Cd74/Sema6a/Abl1/Jam2/Notch1/C1qtnf1/Hspg2/Gpnmb/Pde5a/Tug1/Mdk/Rhoa/Sema4d
GO:0007188	adenylate cyclase-modulating G protein-coupled receptor signaling pathway	138	0.429388	1.82805	7.82528e-05	0.0046023	Drd2/Drd1/Gpr101/Adora2a/Gnal/Oprk1/Adcy5/Gpr6/Pde10a/Flna/Pln/Lpar1/Gpr37/Drd5/Adgrg6/Htr4/S1pr5/Galr1/Adra2c/Htr1d/Rgs2/Arrdc3/Oprm1/Grm4/Gna12/Lgr5/Adcyap1r1
GO:0048565	digestive tract development	94	0.474665	1.90905	8.01577e-05	0.00466308	Nts/Rarb/Sfrp1/Sox11/Oxtr/Tgfb2/Ednrb/Ahi1/Col3a1/Fgfr2/Sox10/Pdgfra/Dchs1/Ccdc39/Aldh1a2/Hmgcs2/Gli3/Ass1/Nipbl/Bmp4/Tcf7l2/Il6st/Tgfbr2/Megf8/Sfrp2/Stx2/Smo/Pdgfc/Notch1
GO:0050801	ion homeostasis	489	0.310558	1.54468	8.25641e-05	0.00475143	Drd2/Drd1/Adora2a/Tac1/Htr2c/Atp6ap1l/Adcy5/Ryr3/Gpr6/Sgk1/Clic4/Tf/Dcn/Pln/Lpar1/Kcnj16/Oxtr/Tgfb2/Cp/Trpc4/Ednrb/Gstm2/Stc1/Car2/Calb2/Slc12a2/Slc6a9/Trpc7/Galr1/Bmp6/Slc4a4/Ackr4/Lrrk2/Chd7/Tacr1/Inpp4b/Ca12/Pdgfra/Wnk1/Alas2/Oprm1/Grik2/Slc8a3/Cd38/Ddit3/Slc7a11/Hap1/Gstm7/Smpd3/Prkd1/Cav1/Xpr1/Fzd2/Atp1b3/Tmtc4/Nr3c2/Pkd2/Atp7a/Gja1/Enpp1/Cln5/Cav2/Mtss1/Adcyap1r1/Kcna1/Fgf2/Dbi/Bmp4/Atp1b2/…
GO:0043278	response to morphine	46	0.585561	2.0641	8.38645e-05	0.00477493	Drd2/Drd1/Tac1/Penk/Ppp1r1b/Oprk1/Adcy5
GO:0090596	sensory organ morphogenesis	174	0.39775	1.75281	8.57168e-05	0.00482902	Rarb/Dlx6/Ntn1/Sox11/Dlx5/Tenm3/Six3/Pou3f4/Ahi1/Chd7/Itga8/Myo6/Meis1/Fat1/Fgfr2/Notch2/Cfh/Zeb1/Pls1/Gli3/Cdon/Lrig1/Prrx1/Rbp4/Fzd2/Bmp7/Hmgn1/Sox2/Hipk2/Aqp1/Alms1/Prox1/Fgf2/Nipbl/Sp1/Bmp4/Col11a1/Ephb1/Rest/Zhx2/Rpgr/Celsr1/Tspan12/Gjb6/Pou2f1
GO:0032355	response to estradiol	165	0.40468	1.78597	8.71238e-05	0.00485715	Nts/Rgs9/Drd1/Penk/Sfrp1/Vim/Igf2/Oxtr/Tgfb2/Ezh2/Igfbp2/Enpp2/C3/Col1a1/Txnip/Tacr1/Cryab/Ccn2/Pdgfra/Cd38/Ptch1/Aldh1a2/Gpx1/Gja1/Ass1/Bmp7/Dusp1/Adcyap1r1/Nefh/Cdkn1b/Bmp4/Cd4/Arpc1b
GO:0006936	muscle contraction	185	0.387131	1.73817	8.8405e-05	0.00487777	Drd2/Drd1/Myh11/Scn4b/Ryr3/Asb15/Acta2/Pln/Gsn/Oxtr/Actn2/Ednrb/Stc1/Sulf1/Gaa/Adra2c/Tacr1/Nppa/Cald1/Mylk/Htr1d/Ccn2/Rgs2/Arhgap42/Tpm2/Prok2/Slc8a3/Cd38/Tpm4/Smpd3/Cav1/Kcna1/Tmod3/Abat/Gucy1a1/Akap9/Smad5/Pde4b/Kcna5/Tnnt2/Kcnj2/Tmem38b/Ctnna3/Fxyd1/Pde5a
GO:0002009	morphogenesis of an epithelium	363	0.322738	1.56364	9.14909e-05	0.00498722	Hhip/Gpc3/Sfrp1/Pard3/Clic4/Flna/Fgf1/Ntn1/Sox11/Tgfb2/Mgp/Zic2/Spag6l/Dab2/Car2/Slc12a2/Msn/Sulf1/Ahi1/Id4/Rgma/Ddr1/Sox4/Fat1/Nfatc3/Mmp14/Fgfr2/Sox10/Notch2/Pdgfra/Dchs1/Csf1/Ccdc39/Enah/Ptch1/Aldh1a2/Gli3/Adam17/Fzd2/Vcl/Pkd2/Klf4/Lgr5/Atp7a/Gja1/Bmp7/Arhgap24/Mtss1/Sox2/Ccn1/Ctsh/Alms1/Rhoc/Ntn4/Prox1/Fgf2/Bcl10/Zic5/Prkx/Bmp4/Spint2/Tgfbr2/Stard13/Megf8/Abl1/Sfrp2/Celsr1/Smo/Pals1/Notch1/Fe…
GO:0043270	positive regulation of ion transport	220	0.372986	1.70821	9.22524e-05	0.00498722	Drd2/Rgs9/Drd1/Adora2a/Htr2c/Oprk1/Scn4b/Sgk1/Flna/Actn2/Gstm2/Stc1/Slc12a2/Cnksr3/Slc6a9/Pcp4/Plp1/Kcnmb1/Nppa/Mylk/Itgb1/Ano6/Wnk1/Hap1/Gstm7/Cav1/Atp1b3/Kif5b/Pkd2/Atp7a/Adcyap1r1/Rtn4/Kcna1/Dbi/Abat/Cacng4/Akap9/Bmp4/Atp1b2/Cd4
GO:0006875	cellular metal ion homeostasis	363	0.322592	1.56293	9.33299e-05	0.00499501	Drd2/Drd1/Tac1/Htr2c/Adcy5/Ryr3/Gpr6/Sgk1/Tf/Pln/Lpar1/Oxtr/Tgfb2/Cp/Trpc4/Ednrb/Gstm2/Stc1/Calb2/Slc12a2/Slc6a9/Trpc7/Galr1/Bmp6/Ackr4/Chd7/Tacr1/Inpp4b/Pdgfra/Alas2/Oprm1/Grik2/Slc8a3/Cd38/Ddit3/Hap1/Gstm7/Smpd3/Prkd1/Cav1/Fzd2/Atp1b3/Tmtc4/Nr3c2/Pkd2/Atp7a/Gja1/Cav2/Adcyap1r1/Fgf2/Dbi/Bmp4/Atp1b2/Trpm7/Il6st/Cd4/Ackr3/Cybrd1/Pdzd8/Kcna5/Abl1/Grm5/Atg5/Slc30a10/Selenot/Fis1/C1qtnf1/Tmem38b/Fxyd…
GO:0055123	digestive system development	104	0.461918	1.89455	9.60821e-05	0.0050914	Nts/Rarb/Sfrp1/Sox11/Igf2/Oxtr/Tgfb2/Ednrb/Ahi1/Col3a1/Fgfr2/Sox10/Pdgfra/Dchs1/Ccdc39/Aldh1a2/Hmgcs2/Gli3/Ass1/Nipbl/Bmp4/Tcf7l2/Il6st/Tgfbr2/Megf8/Sfrp2/Stx2/Smo/Pdgfc/Notch1/Igf1r/Epb41l5/Ep300/Rb1/Pkd1/Zic3/Stra6/Foxp4/Cdkn1a
GO:0048771	tissue remodeling	131	0.43755	1.85653	0.000101506	0.00529447	Cartpt/Sfrp1/Bgn/Dlk1/Flna/Tf/Tgfb2/Abi3bp/Cp/Timp1/Car2/Erbb3/Chd7/Eln/Inpp4b/Nfatc3/Tmbim1/Mmp14/Notch2/Cd38/Tgfbr3/Cav1/Atp7a/Tpp1/Gja1/Enpp1/Rock1/Gpr137b/Atg5/Csf1r/Gpnmb/Tgm2/Mdk
GO:0014072	response to isoquinoline alkaloid	48	0.570568	2.00908	0.000102342	0.00529447	Drd2/Drd1/Tac1/Penk/Ppp1r1b/Oprk1/Adcy5
GO:0007568	aging	329	0.330814	1.5868	0.000102882	0.00529447	Penk/Gfra1/Adcy5/Prkcd/Vim/Slc32a1/Mme/Dcn/Mog/Mbp/Gsn/Apod/Tgfb2/Abi3bp/Cp/Timp1/Ednrb/Serping1/Timp3/Gstm2/Slc12a2/Igfbp2/Prelp/Lrrk2/Cnp/Kcnmb1/Ptpn5/Cryab/Eln/Ccn2/Pmp22/Mir134/Baz2b/Vcam1/Pdgfra/Cfh/Ddit3/Fos/Smpd3/Prkcq/Hsd17b4/Cav1/Gna12/Gpx1/Ass1/Dpyd/Ctsc/Kat6a/Rtn4/Npm1/Eef1e1/Fgf2/Abat/Krt83/Fads1/Cacybp/Tgfbr2/Picalm/Abl1/Grm5/Mbd2/Slc30a10/Gjb6/Sod2/C1qa/Sin3a
GO:1903034	regulation of response to wounding	108	0.453816	1.88369	0.000106979	0.00545288	Prkcd/Kremen1/Acta2/Flna/Cd9/Serping1/Slc12a2/Rgma/Kank1/Mylk/Enpp4/Pros1/Thbs1/Itgb1/Ano6/Pdgfra/Anxa2/Inpp5f/Cers2/Adam17/Cav1/Klf4/Atp7a/Gja1/Rtn4/Fgf2/Plpp3/Abat/Neo1/Tnfrsf12a/C1qtnf1/Fermt2/Vkorc1/Mdk/Igf1r
GO:0014706	striated muscle tissue development	281	0.346163	1.63252	0.000109849	0.00554634	Rarb/Myh11/Rxrg/Dcn/Pln/Sox11/Igf2/Tgfb2/Sik1/Actn2/Foxp2/Erbb3/Chd7/Tsc22d3/Nppa/Vax1/Meis1/Eln/Itgb1/Ifitm3/Rgs2/Pmp22/Nfatc3/Fgfr2/Pdgfra/Dner/Kdm6b/Ddx17/Aldh1a2/Tgfbr3/Cdon/Fos/Rbp4/Cav1/Gpx1/Kcnab1/Kcnk2/Gja1/Ybx3/Bmp7/Cav2/Sirt2/Megf10/Marcks/Adamts9/Prox1/Fgf2/Svil/Tomm70/Bmp4/Col11a1/Tcf7l2/Cacybp/Tgfbr2/Sgce/Ephb1/Prkaa1/Nr2f2/Foxn2/Naca/Tnnt2/Atg5/Csf1r/Smo/Notch1/Plagl1/Hnrnpu/Hspg2/N…
GO:0051482	positive regulation of cytosolic calcium ion concentration involved in phospholipase C-activating G protein-coupled signaling pathway	17	0.776092	2.11656	0.000113519	0.00567805	Drd2/Drd1/Htr2c/Lpar1
GO:0008285	negative regulation of cell population proliferation	462	0.30837	1.52663	0.000116703	0.00578327	Drd2/Adora2a/Rarb/Gpc3/Sfrp1/Ogn/Dlk1/St18/Sox11/Rerg/Bcl11b/Apod/Tgfb2/Abi3bp/Ndrg1/Cd9/Strn/Btg1/Dab2/Sulf1/Ddr1/Sox4/Kat2b/Vax1/Meis1/Thbs1/Itgb1/Ifitm3/Sparc/Pmp22/Lrrc32/Peli1/Fgfr2/LOC361346/Sox10/Ptgds/Rap1gap/Itgb1bp1/Cers2/Grm4/Zeb1/Ptch1/Aldh1a2/Tgfbr3/Gli3/Tmem131l/Ptprz1/Wdr6/Rbp4/Cav1/Gna12/Klf4/Kcnk2/Gja1/Bmp7/Dusp1/Cav2/Mtss1/Trim32/Sirt2/Sox2/Cd80/Npm1/Cdkn1b/Eef1e1/Prox1/Fgf2/Bmp…
GO:0048562	embryonic organ morphogenesis	170	0.393056	1.73549	0.000131651	0.00644182	Rarb/Dlx6/Ntn1/Sox11/Dlx5/Six3/Tgfb2/Pou3f4/Ahi1/Dlx2/Chd7/Itga8/Myo6/Mmp14/Fgfr2/Notch2/Pdgfra/Ccdc39/Zeb1/Pls1/Gli3/Lrig1/Prrx1/Rbp4/Fzd2/Pkd2/Gja1/Bmp7/Sox2/Hipk2/Prox1/Nipbl/Sp1/Bmp4/Col11a1/Tcf7l2/Tgfbr2/Rest/Megf8/Axin1/Celsr1/Smo/Gjb6/Notch1/Hspg2/Fgfr1/Setd2/Ripor2/Bmi1/Efemp1/Ift140/Dync2i1/Zic3/Eng/Alx3/Stra6/Tead1/Sod1/Lrp6/Pax6/Chst11/Tgfbr1
GO:0031641	regulation of myelination	49	0.565942	2.01296	0.000132399	0.00644182	Rarb/Rxrg/Pard3/Myrf/Tf/Mag/Sox10/Tmem98/Nkx6-2/Ptprz1/Ctsc/Sirt2/Tcf7l2/Cyfip1/Jam2/Mtmr2
GO:0001889	liver development	161	0.40201	1.77233	0.000143289	0.00690884	Nts/Mki67/Nfkbia/Fgf1/Cp/Ezh2/Pros1/Notch2/Alas2/Ccdc39/Ptch1/Tgfa/Aldh1a2/Hmgcs2/Tgfbr3/Gli3/Pkd2/Ephx1/Atp7a/Ass1/Enpp1/Rpl30/Qdpr/Rtn4/Npm1/Prox1/Sp1/Bmp4/Tet2/Rps16/Rpl32/Lims1/Notch1/Sod2/Pou2f1/Mdk/Zmpste24/Jun/Srsf5/Ccnd2/Hnrnpd/Acadm/Pkd1/Zic3/Rap1a/Srd5a1/Aldh9a1/Sec63/Igf2r
GO:0003013	circulatory system process	349	0.320823	1.54336	0.00014701	0.00700064	Drd2/Cartpt/Drd1/Adora2a/Tac1/Htr2c/Scn4b/Cacna2d2/Asb15/Acta2/Pln/Gsn/Col1a2/Oxtr/Tgfb2/Drd5/Klf2/Ednrb/Stc1/Bmp6/Prcp/Gaa/Adra2c/Chd7/Kcnmb1/Tacr1/Nppa/Kat2b/Ptpro/Htr1d/Ccn2/Rgs2/Arhgap42/Wnk1/Itgb1bp1/Cd38/Pde3a/Enpep/Smpd3/Prkcq/Sult1a1/Cav1/Gna12/Erap1/Gpx1/Gja1/Tjp2/Abat/Gucy1a1/Akap9/Rock1/Smad5/Scpep1/Pde4b/Nr2f2/Kcna5/Abl1/Tnnt2/Atg5/Kcnj2/Sod2/Fermt2/Sp4/Tmem38b/Ctnna3/Fxyd1/Rnls/Pde5a
GO:0022612	gland morphogenesis	102	0.454568	1.85526	0.000147809	0.00700064	Mki67/Sfrp1/Fgf1/Ntn1/Tgfb2/Cp/Slc12a2/Msn/Sulf1/Erbb3/Crip1/Id4/Ddr1/Fgfr2/Notch2/Csf1/Ptch1/Tgfa/Gli3/Cav1/Bmp7/Rtn4/Ntn4/Prox1/Bmp4/Tet2/Tgfbr2/Lims1/Notch1/Tgm2/Mdk/Igf1r
GO:0051480	regulation of cytosolic calcium ion concentration	221	0.365084	1.67455	0.000163454	0.00767372	Drd2/Drd1/Tac1/Htr2c/Adcy5/Ryr3/Gpr6/Pln/Lpar1/Oxtr/Tgfb2/Trpc4/Ednrb/Gstm2/Calb2/Trpc7/Galr1/Ackr4/Chd7/Tacr1/Pdgfra/Oprm1/Slc8a3/Cd38/Ddit3/Hap1/Gstm7/Smpd3/Prkd1/Cav1/Fzd2/Pkd2/Gja1/Cav2/Adcyap1r1/Fgf2/Dbi/Bmp4/Il6st/Cd4/Ackr3/Kcna5/Abl1/Grm5/Atg5/Selenot/Fis1/C1qtnf1/Tmem38b/Fxyd1/Tgm2/Akap5/Ibtk/Gria1
GO:0098801	regulation of renal system process	25	0.684725	2.09844	0.000166367	0.00774255	Drd2/Adora2a/Tac1/Ednrb/Stc1/Tacr1/Ptpro
GO:0071396	cellular response to lipid	454	0.304538	1.50634	0.000172137	0.00794205	Nts/Penk/Oprk1/Lpl/Adcy5/Rxrg/Sfrp1/Vim/Sgk1/Foxo1/Nfkbia/Lpar1/Plat/Ddit4/Col1a2/Dab2/Ednrb/Stc1/Cbx3/Msn/Fbxo32/Enpp2/Bmp6/Zfp36/Col1a1/Errfi1/Kcnmb1/Yes1/Eln/Itgb1/Npc1/Fgfr2/Sox10/Hmgb2/Cdk4/Mrc1/Brinp3/Cfh/Ptch1/Ddx17/Mgst1/Aldh1a2/Hmgcs2/Zfp36l1/Fzd2/Nr3c2/Klf4/Ephx1/Ass1/Bmp7/Ubr5/Nefh/Trim5/Cd80/Npm1/Cd84/Aqp1/Bcl10/Bmp4/Fn1/Lmnb1/Hnrnpa1/Adipor2/Rest/Pde4b/Akap8/Kank2/Fkbp4/Padi2/Abl1/Rp…
GO:0014002	astrocyte development	26	0.671991	2.06676	0.000183792	0.00840729	Drd1/Adora2a/Vim/Tspan2/Plp1
GO:0051208	sequestering of calcium ion	80	0.475061	1.87881	0.000204648	0.00926912	Drd2/Drd1/Htr2c/Ryr3/Pln/Tgfb2/Gstm2/Chd7/Ddit3/Hap1/Gstm7/Prkd1/Pkd2/Fgf2/Dbi/Abl1/Atg5/Tmem38b/Ibtk
GO:0055074	calcium ion homeostasis	294	0.329782	1.55843	0.000206096	0.00926912	Drd2/Drd1/Tac1/Htr2c/Adcy5/Ryr3/Gpr6/Pln/Lpar1/Oxtr/Tgfb2/Trpc4/Ednrb/Gstm2/Stc1/Calb2/Trpc7/Galr1/Ackr4/Chd7/Tacr1/Inpp4b/Pdgfra/Oprm1/Grik2/Slc8a3/Cd38/Ddit3/Hap1/Gstm7/Smpd3/Prkd1/Cav1/Fzd2/Tmtc4/Pkd2/Gja1/Cav2/Adcyap1r1/Fgf2/Dbi/Bmp4/Il6st/Cd4/Ackr3/Pdzd8/Kcna5/Abl1/Grm5/Atg5/Selenot/Fis1/C1qtnf1/Tmem38b/Fxyd1/Tgm2/Akap5/Ibtk/Gria1/Nalf2/Pacs2/Casr
GO:0001655	urogenital system development	280	0.338472	1.59106	0.000215825	0.0096258	Gfra1/Rarb/Gpc3/Sfrp1/Acta2/Mme/Dcn/Fgf1/Nid1/Sox11/Tgfb2/Ednrb/Car2/Sulf1/Bmp6/Ahi1/Lrrk2/Crip1/Id4/Sox4/Itga8/Ptpro/Tiparp/Fgfr2/Notch2/Pdgfra/Vcan/Cfh/Dchs1/Ptch1/Aldh1a2/Hmgcs2/Gli3/Enpep/Rbp4/Nfia/Pkd2/Lgr5/Ass1/Bmp7/Mtss1/Bicc1/Ctsh/Aqp1/Cdkn1b/Prox1/Fgf2/Prkx/Bmp4/Tet2/Smad5/Sgce/Pecam1/Kank2/Fkbp4/Sec61a1/Smo/Notch1/Ret/Igf1r/Plce1/Rhoa/Adamts1/Zmpste24/Klf15/Kirrel3/Fgfr1/Notch3/Flcn/Jag…
GO:0003158	endothelium development	100	0.441715	1.79802	0.000219162	0.00969385	Apold1/Clic4/Fgf1/Hapln2/Btg1/Ednrb/Stc1/Msn/Bmp6/Fstl1/Kdm6b/Zeb1/Col18a1/Vcl/Gpx1/Tmem100/Gja1/Rdx/Tjp2/Prox1/Rock1/Bmp4/Stard13/Nr2f2/Pecam1/Notch1/Rhoa/Jag1/Smad4/Arhgef26/Rap1a/Tjp1/Rap2c/Agt/Foxp1/Tgfbr1
GO:0048260	positive regulation of receptor-mediated endocytosis	42	0.595629	2.05905	0.000221604	0.00972151	Drd2/Pard3/Tf/Dab2/Ahi1/C3/Ptpn5/Anxa2
GO:0032526	response to retinoic acid	96	0.458409	1.84615	0.000227286	0.00988972	Drd1/Rxrg/Col1a2/Tgfb2/Igfbp2/Bmp6/Col1a1/Yes1/Eln/Fgfr2/Brinp3/Cd38/Ptch1/Aldh1a2/Map7/Rbp4/Klf4/Gja1/Dusp1/Sox2/Ctsh/Aqp1/Bmp4
GO:0060541	respiratory system development	192	0.370308	1.66091	0.000231674	0.00997167	Hhip/Gpc3/Mme/Fgf1/Sox11/Dlx5/Tgfb2/Mgp/Cp/Klf2/Foxp2/Fndc3b/Chd7/Col3a1/Errfi1/Ano1/Ccn2/Sparc/Mmp14/Fgfr2/Myt1/Pdgfra/Ccdc39/Slc7a11/Aldh1a2/Hmgcs2/Gli3/Smpd3/Rbp4/Kcnab1/Atp7a/Ass1/Sox2/Ctsh/Prox1/Fgf2/Lta4h/Sp1/Bmp4/Tns3/Hnrnpa1/Tgfbr2
GO:0048713	regulation of oligodendrocyte differentiation	42	0.59432	2.05452	0.000232896	0.00997167	Opalin/Enpp2/Dlx2/Id4/Olig2/Aspa/Dlx1/Tmem98/Ptprz1/Sirt2/Qk/Bmp4/Tcf7l2/Dusp15/Notch1/Mdk
GO:0007584	response to nutrient	183	0.377888	1.69737	0.000235386	0.00997538	Penk/Lpl/Rbp1/Sfrp1/Vim/Mog/Gsn/Tgfb2/Mgp/Cp/Timp3/Stc1/Igfbp2/Col1a1/Eln/Itgb1/Sparc/Gatm/Vcam1/A2m/Ddit3/Aldh1a2/Hmgcs2/Folr2/Cav1/Fzd2/Gpx1/Ass1/Bmp7/Dpyd/Dbi/Tnks/Fads1/Il6st/Cd4/Tgfbr2/Adipor2/Slc16a1/Hat1/Kank2/Acsl3/Sfrp2/Sod2/Pdia3/Abca1/Igf1r/Adamts1/Arsb/Casr
GO:0010876	lipid localization	241	0.358553	1.64146	0.00023671	0.00997538	Drd2/Tac1/Slc10a4/Lpl/Prkcd/Apold1/Nfkbia/Apod/Dab2/Abca8a/Galr1/Bmp6/C3/Ldaf1/Thbs1/Apoc1/Npc1/Ano6/Cidea/Anxa2/Gulp1/Gltp/Atp11a/Ptch1/Rbp4/Cav1/Ptpn11/Plin2/Xkr6/Enpp1/Stard5/Atp11c/Abca2/Npc2/Dbi/Nucb2/Sgpp1/Prkaa1/Pdzd8/Hbp1/Acsl3/Pnlip/Abhd5/Fis1/C1qtnf1/Osbpl9/Abca1/Pip4k2a/Ldlrap1/Lima1/Ano4/Gm2a/Tnfrsf11a/Slco3a1/Lrp10/Scarb2/Osbpl8/Cert1
GO:0001763	morphogenesis of a branching structure	145	0.405536	1.74317	0.000243333	0.010103	Drd2/Hhip/Gpc3/Sfrp1/Clic4/Fgf1/Ermn/Mgp/Slc12a2/Sulf1/Lrrk2/Dlx2/Ddr1/Nfatc3/Mmp14/Fgfr2/Sox10/Pdgfra/Dchs1/Csf1/Ptch1/Gli3/Pkd2/Bmp7/Sox2/Rtn4/Ctsh/Ntn4/Prox1/Fgf2/Bmp4/Spint2/Tgfbr2/Abl1/Sfrp2/Celsr1/Smo/Notch1/Tgm2/Mdk
GO:0071559	response to transforming growth factor beta	188	0.37657	1.68792	0.000244105	0.010103	Penk/Sfrp1/Sox11/Col1a2/Tgfb2/Dab2/Col1a1/Col3a1/Itga8/Yes1/Dlx1/Eln/Thbs1/Itgb1/Lrrc32/Fgfr2/Lats2/Cidea/Pde3a/Zeb1/Tgfbr3/Adam17/Fos/Zfp36l1/Snx25/Cav1/Enpp1/Cav2/Hipk2/Pak2/Rock1/Fn1/Smad5/Tgfbr2/Dusp15/Itgb8/Pecam1/Abl1/Axin1/Smurf2/Lims1/Pals1/Fermt2/Pdia3/Igf1r/Zfp36l2/Jun/Epb41l5/Flcn/Appl2/Smad4/Ep300
GO:0003012	muscle system process	283	0.340154	1.60336	0.000245402	0.010103	Drd2/Drd1/Myh11/Scn4b/Ryr3/Asb15/Acta2/Foxo1/Pln/Gsn/Oxtr/Actn2/Ednrb/Ezh2/Stc1/Sulf1/Fbxo32/Gaa/Adra2c/Errfi1/Tacr1/Nppa/Cald1/Mylk/Htr1d/Ccn2/Rgs2/Gatm/Arhgap42/Nfatc3/Tpm2/Inpp5f/Prok2/Slc8a3/Cd38/Tpm4/Smpd3/Cav1/Klf4/Npm1/Kcna1/Tmod3/Gtf2ird1/Abat/Pak2/Tomm70/Gucy1a1/Akap9/Rock1/Smad5/Pde4b/Kcna5/Tnnt2/Kcnj2/Notch1/Tmem38b/Ctnna3/Fxyd1/Pde5a/Rhoa/Klf15/Pdlim5/Smad4/Cert1/Utrn/Ep300/Adra2a/Bbs…
GO:0006874	cellular calcium ion homeostasis	289	0.332274	1.57045	0.000249593	0.0101971	Drd2/Drd1/Tac1/Htr2c/Adcy5/Ryr3/Gpr6/Pln/Lpar1/Oxtr/Tgfb2/Trpc4/Ednrb/Gstm2/Stc1/Calb2/Trpc7/Galr1/Ackr4/Chd7/Tacr1/Inpp4b/Pdgfra/Oprm1/Grik2/Slc8a3/Cd38/Ddit3/Hap1/Gstm7/Smpd3/Prkd1/Cav1/Fzd2/Tmtc4/Pkd2/Gja1/Cav2/Adcyap1r1/Fgf2/Dbi/Bmp4/Il6st/Cd4/Ackr3/Pdzd8/Kcna5/Abl1/Grm5/Atg5/Selenot/Fis1/C1qtnf1/Tmem38b/Fxyd1/Tgm2/Akap5/Ibtk/Gria1/Nalf2/Pacs2/Casr
GO:0061008	hepaticobiliary system development	163	0.399685	1.76064	0.000252926	0.010255	Nts/Mki67/Nfkbia/Fgf1/Cp/Ezh2/Pros1/Notch2/Alas2/Ccdc39/Ptch1/Tgfa/Aldh1a2/Hmgcs2/Tgfbr3/Gli3/Pkd2/Ephx1/Atp7a/Ass1/Enpp1/Rpl30/Qdpr/Rtn4/Npm1/Prox1/Nipbl/Sp1/Bmp4/Tet2/Rps16/Rpl32/Lims1/Notch1/Sod2/Pou2f1/Mdk/Zmpste24/Jun/Srsf5/Ccnd2/Hnrnpd/Acadm/Pkd1/Zic3/Rap1a/Srd5a1/Aldh9a1/Sec63/Igf2r
GO:0045446	endothelial cell differentiation	87	0.470292	1.87522	0.000255209	0.0102697	Apold1/Clic4/Hapln2/Btg1/Ednrb/Stc1/Msn/Bmp6/Fstl1/Kdm6b/Zeb1/Col18a1/Vcl/Gpx1/Tmem100/Rdx/Tjp2/Prox1/Rock1/Bmp4/Nr2f2/Pecam1/Notch1/Jag1/Smad4/Arhgef26/Rap1a/Tjp1/Rap2c/Agt/Tgfbr1
GO:0021756	striatum development	21	0.721654	2.07796	0.00025966	0.0103709	Drd2/Drd1/Rarb/Bcl11b/Foxp2/Lrrk2/Slc7a11/Enpp1
GO:0046883	regulation of hormone secretion	196	0.380642	1.7154	0.000266615	0.0105698	Drd2/Cartpt/Tac1/Htr2c/Nnat/Oprk1/Adcy5/Sfrp1/Sox11/Syt9/Dab2/Doc2b/Galr1/Bmp6/Chd7/Sox4/Tacr1/Nppa/Map4k4/Ano1/Baiap3/Myt1/Cd38/Rbp4/Kif5b/Ptpn11/Gja1/Pde8b/Abat/Tcf7l2/Nucb2/Il6st/Slc16a1/Rest
GO:0031589	cell-substrate adhesion	249	0.350342	1.61098	0.000271645	0.01069	Arhgap6/Flna/Nid1/Apod/Abi3bp/Actn2/Spag6l/Dab2/Egfl6/Itgbl1/Enpp2/Fndc3b/Col1a1/Jam3/Ddr1/Col3a1/Kank1/Map4k4/Itga8/Ap1ar/Thbs1/Ntng1/Itgb1/Ccn2/Mmp14/Net1/Alox15/Vcam1/Itgb1bp1/Csf1/Ptprz1/Vcl/Vamp3/Ptpn11/Ecm2/Ccn1/Marcks/Ntng2/Adamts9/Ntn4/Rock1/Prkx/Atp1b2/Fn1/Trpm7/Cd63/Ephb1/Pecam1/Tnfrsf12a/Abl1/Lamc1/Lims1/Notch1/Fermt2/Iqgap1/Mdk/Rhoa/P4hb/Epb41l5/Jag1/Utrn/Peak1/Tiam1/Cntn2/Itga6/Carmi…
GO:0048732	gland development	381	0.315884	1.53716	0.000281341	0.0109085	Nts/Drd2/Mki67/Sfrp1/Nfkbia/Fgf1/Ntn1/Igf2/Fa2h/Six3/Bcl11b/Tgfb2/Cp/Ezh2/Slc12a2/Msn/Sulf1/Erbb3/Crip1/Id4/Ddr1/Pros1/Nfatc3/Fgfr2/Sox10/Notch2/Pdgfra/Alas2/Rap1gap/Csf1/Ccdc39/Ptch1/Tgfa/Aldh1a2/Hmgcs2/Tgfbr3/Gli3/Cav1/Gpx1/Pkd2/Ephx1/Atp7a/Gja1/Ass1/Bmp7/Enpp1/Rpl30/Qdpr/Sox2/Rtn4/Npm1/Cdkn1b/Ntn4/Prox1/Fgf2/Sp1/Bmp4/Tet2/Tcf7l2/Tgfbr2/Rps16/Fkbp4/Abl1/Rpl32/Lims1/Smo/Notch1/Sod2/Pou2f1/Tgm2/M…
GO:0070482	response to oxygen levels	329	0.321695	1.54306	0.000285894	0.0109085	Drd2/Drd1/Penk/Nr4a2/Prkcd/Apold1/Sfrp1/Foxo1/Tf/Lpar1/Plat/Ddit4/Oxtr/Tgfb2/Ndrg1/Stc1/Col1a1/Kcnmb1/Sox4/Nppa/Cryab/Eln/Ccn2/Nfatc3/Mmp14/Sdc2/Vcam1/Pdgfra/Cdk4/Alas2/Slc8a3/Cd38/Tgfbr3/Adam17/Prkcq/Plekhn1/Zfp36l1/Bnip2/Cav1/Atp7a/Kcnk2/Sirt2/Rtn4/Npm1/Aqp1/Cdkn1b/Abat
GO:0040013	negative regulation of locomotion	240	0.349679	1.59755	0.000286695	0.0109085	Drd2/Drd1/Adora2a/Htr2c/Mctp1/Sfrp1/Clic4/Dcn/Apod/Drd5/Timp1/Stc1/Sulf1/Col3a1/Kank1/Sema6d/Ap1ar/Thbs1/Plxnb3/Arrdc3/Itgb1bp1/Cers2/Tgfbr3/Gna12/Klf4/Gadd45a/Gja1/Dusp1/Adamts9/Fgf2/Srgap1/Spint2/Atp1b2/Cd74/Cd63/Adipor2/Stard13/Sema5b/Nr2f2/Sema6a/Padi2/Grm5/Sfrp2/Notch1/Adipor1/Reck/Rhoa/Sema4d/Tcaf1/Arhgdia/Flcn/Osbpl8/Jag1/Ripor2
GO:1901655	cellular response to ketone	109	0.442716	1.8398	0.000287457	0.0109085	Nts/Adcy5/Sfrp1/Sgk1/Foxo1/Plat/Ddit4/Klf2/Cbx3/Msn/Fbxo32/Errfi1/Eln/Sox10/Cdk4/Klf4/Ass1/Npm1/Aqp1/Bmp4/Fn1/Lmnb1/Akap8/Prkaa1/Rpl32/Hnrnpu/Igf1r/Rhoa/Adamts1/Fdx1/Bmi1/Ep300/Mir93/Srd5a1/Mir196c/Dcps/Pax6/Jak2
GO:0060326	cell chemotaxis	161	0.39001	1.71943	0.000287992	0.0109085	Prkcd/Fgf1/Lpar1/Tgfb2/Ch25h/Gab1/Vav3/Ednrb/Slc12a2/Enpp2/Ackr4/Scg2/Jam3/Ptpro/Thbs1/Ano6/Hmgb2/Plxnb3/Vcam1/Pdgfra/Wnk1/Csf1/Adam17/Prkcq/Prkd1/Gja1/Dusp1/Mospd2/Mtus1/Fgf2/Myo9b/Cd74/Ackr3/Ephb1/Pde4b/Rhog/Padi2/Csf1r/Tmsb4x/Notch1
GO:0071385	cellular response to glucocorticoid stimulus	71	0.488505	1.89746	0.000289426	0.0109085	Nts/Sgk1/Foxo1/Plat/Ddit4/Stc1/Cbx3/Fbxo32/Zfp36/Errfi1/Eln/Hmgcs2/Zfp36l1/Ephx1/Ass1/Aqp1/Bmp4/Lmnb1/Rest/Rpl32/Hnrnpu/Igf1r/Zfp36l2
GO:0051781	positive regulation of cell division	43	0.580536	2.01049	0.000293674	0.0109912	Drd2/Fgf1/Igf2/Tgfb2/Fgfr2/Tgfa/Pkp4/Sirt2/Fgf2/Cdc14b/Pkn2/Pdgfc/Cdc14a/Mdk/Igf1r/Rhoa
GO:0085029	extracellular matrix assembly	34	0.613205	2.03279	0.000299193	0.0110939	Myh11/Hapln2/Col1a2/Col3a1/Eln/Ntng1/Mfap4/Smpd3/Atp7a/Ntng2/Ntn4/Phldb1/Notch1
GO:0031960	response to corticosteroid	185	0.37386	1.67858	0.000300564	0.0110939	Nts/Gpx3/Sgk1/Foxo1/Plat/Ddit4/Mgp/Stc1/Igfbp2/Cbx3/Fbxo32/Bmp6/Zfp36/C3/Col1a1/Errfi1/Eln/Ccn2/Sparc/Ptgds/A2m/Hmgcs2/Fos/Sult1a1/Zfp36l1/Cav1/Ephx1/Ass1/Dusp1/Dpyd/Hnmt/Aqp1/Bmp4/Fn1/Kcnj10/Lmnb1/Rest/Rpl32/Notch1/Hnrnpu/Mdk/Igf1r/Zfp36l2/Rhoa
GO:0022408	negative regulation of cell-cell adhesion	106	0.448743	1.84664	0.000312734	0.0114641	Adora2a/Prkcd/Mbp/Cd9/Bmp6/Lrrc32/Peli1/Wnk1/Gli3/Tmem131l/Klf4/Ass1/Rdx/Cd80/Abat/Bmp4/Spint2/Cd74/Abl1/Notch1/C1qtnf1/Gpnmb/Pde5a/Tug1/Mdk/Epb41l5/Jag1/Ripor2
GO:0051283	negative regulation of sequestering of calcium ion	76	0.480654	1.89023	0.000322997	0.0117597	Drd2/Drd1/Htr2c/Ryr3/Pln/Tgfb2/Gstm2/Chd7/Ddit3/Hap1/Gstm7/Prkd1/Pkd2/Fgf2/Dbi/Abl1/Atg5/Tmem38b/Ibtk
GO:0048598	embryonic morphogenesis	398	0.311364	1.51749	0.000327892	0.0118573	Rarb/Gpc3/Sfrp1/Dlx6/Ntn1/Sox11/Igf2/Dlx5/Mbp/Six3/Tgfb2/Zic2/Pou3f4/Sp9/Sulf1/Ahi1/Dlx2/Rgma/Chd7/Sox4/Itga8/Myo6/Itgb1/Mmp14/Fgfr2/Notch2/Vcam1/Pdgfra/Lats2/Wnk1/Ccdc39/Kdm6b/Enah/Zeb1/Ptch1/Pls1/Aldh1a2/Gli3/Cdon/Lrig1/Zfp36l1/Prrx1/Rbp4/Fzd2/Gna12/Pkd2/Klf4/Gja1/Bmp7/Dusp1/Sox2/Ccn1/Hipk2/Prox1/Nipbl/Bcl10/Plpp3/Zic5/Rock1/Sp1/Bmp4/Map3k20/Spint2/Fn1/Col11a1/Tcf7l2/Tgfbr2/Rest/Phldb1/Megf8/Mu…
GO:0031032	actomyosin structure organization	136	0.406504	1.72645	0.000330977	0.0118885	Tac1/Arhgap6/Anln/Lpar1/Actn2/Spag6l/Csrp1/Tacr1/Eln/Itgb1/Ccn2/Pdgfra/Itgb1bp1/Epb41l4a/Prkcq/Cnn3/Epb41/Alms1/Rhoc/Prox1/Tmod3/Pak2/Rock1/Epb41l2/Trpm7/Cgnl1/Abl1/Ppfia1/Tnnt2/Arap1/Fermt2/Ccdc88a/Nebl/Rhoa/Epb41l5/Smad4/Ep300/Carmil1/Sdc4/Tjp1/Cdc42/Sorbs3
GO:0042417	dopamine metabolic process	33	0.625159	2.05369	0.000336129	0.01189	Drd2/Drd1/Htr2c/Nr4a2/Pde1b/Gpr37/Tgfb2
GO:0043434	response to peptide hormone	377	0.303665	1.4714	0.000337216	0.01189	Drd1/Oprk1/Lpl/Nr4a2/Prkcd/Sgk1/Foxo1/Pln/Plat/Igf2/Oxtr/Actn2/Btg1/Timp1/Ednrb/Car2/Erbb3/Col1a1/Timp4/Errfi1/Kank1/Nppa/Kat2b/Ccn2/Sparc/Gatm/Cdk4/Inpp5f/Hmgcs2/Tgfbr3/Prkcq/Zfp36l1/Wdr6/Rbp4/Cav1/Fzd2/Ptpn11/Gja1/Ass1/Bmp7/Enpp1/Cav2/Qdpr/Mtus1/Marcks/Stxbp3/Cdkn1b/Rock1/Lta4h/Sp1/Fn1/Fads1/Cacybp/Nucb2/Hadha/Cacna2d3/Sesn3/Prkaa1/Ggh/Pnlip/Cyfip1/Slc30a10/Adipor1/Rhoq/Pip4k2a/Iqgap1/Igf1r/Gri…
GO:0071305	cellular response to vitamin D	17	0.749657	2.04446	0.000339395	0.01189	Penk/Sfrp1/Itgb1/Fzd2/Kank2/Pdia3/Adamts1/Casr
GO:0071560	cellular response to transforming growth factor beta stimulus	186	0.373023	1.6739	0.000341761	0.01189	Penk/Sfrp1/Sox11/Col1a2/Tgfb2/Dab2/Col1a1/Col3a1/Itga8/Yes1/Dlx1/Eln/Thbs1/Lrrc32/Fgfr2/Lats2/Cidea/Pde3a/Zeb1/Tgfbr3/Adam17/Fos/Zfp36l1/Snx25/Cav1/Enpp1/Cav2/Hipk2/Pak2/Rock1/Fn1/Smad5/Tgfbr2/Dusp15/Itgb8/Pecam1/Abl1/Axin1/Smurf2/Lims1/Pals1/Fermt2/Pdia3/Igf1r/Zfp36l2/Jun/Epb41l5/Flcn/Appl2/Smad4/Ep300/Eng/Lats1/Snrnp70
GO:0015850	organic hydroxy compound transport	175	0.383813	1.69902	0.000342128	0.01189	Drd2/Cartpt/Drd1/Adora2a/Tac1/Slc10a4/Oprk1/Nfkbia/Oxtr/Syt2/Syt9/Dab2/Pcp4/Galr1/Bmp6/Apoc1/Npc1/Anxa2/Ptch1/Smpd3/Rbp4/Cav1/Ptpn11/Syt6/Rtn4/Stard5/Aqp1/Abca2/Npc2/Abat/Nucb2/Slc16a1/Prkaa1/Pnlip/Syt10/C1qtnf1/Osbpl9/Abca1/Pip4k2a/Ldlrap1/Lima1
GO:0009308	amine metabolic process	71	0.484494	1.88188	0.000358199	0.0123682	Drd2/Drd1/Htr2c/Nr4a2/Pde1b/Gpr37/Tgfb2/Chka/Vcam1/Slc7a11/Sult1a1/Sncaip/Atp7a/Hnmt/Abat
GO:0071549	cellular response to dexamethasone stimulus	43	0.574938	1.9911	0.000362101	0.0124228	Nts/Foxo1/Plat/Ddit4/Cbx3/Fbxo32/Errfi1/Eln/Ass1/Aqp1/Bmp4/Rpl32/Hnrnpu/Igf1r/Bmi1/Ep300
GO:0072507	divalent inorganic cation homeostasis	322	0.317888	1.5212	0.000379464	0.0129356	Drd2/Drd1/Tac1/Htr2c/Adcy5/Ryr3/Gpr6/Pln/Lpar1/Oxtr/Tgfb2/Trpc4/Ednrb/Gstm2/Stc1/Calb2/Trpc7/Galr1/Ackr4/Chd7/Tacr1/Inpp4b/Pdgfra/Oprm1/Grik2/Slc8a3/Cd38/Ddit3/Hap1/Gstm7/Smpd3/Prkd1/Cav1/Fzd2/Tmtc4/Pkd2/Gja1/Cav2/Mtss1/Adcyap1r1/Kcna1/Fgf2/Dbi/Bmp4/Trpm7/Il6st/Cd4/Ackr3/Pdzd8/Kcna5/Abl1/Grm5/Atg5/Slc30a10/Selenot/Fis1/C1qtnf1/Tmem38b/Fxyd1/Tgm2/Akap5/Ibtk/Gria1/Nalf2/Ap3b1/Pacs2/Casr
GO:0006869	lipid transport	211	0.353405	1.60589	0.000419151	0.0141981	Drd2/Tac1/Slc10a4/Prkcd/Apold1/Nfkbia/Apod/Dab2/Abca8a/Galr1/Bmp6/Thbs1/Apoc1/Npc1/Ano6/Anxa2/Gulp1/Gltp/Atp11a/Ptch1/Rbp4/Cav1/Ptpn11/Plin2/Xkr6/Stard5/Atp11c/Abca2/Npc2/Dbi/Nucb2/Sgpp1/Prkaa1/Pdzd8/Hbp1/Acsl3/Pnlip/Fis1/C1qtnf1/Osbpl9/Abca1/Pip4k2a/Ldlrap1/Lima1/Ano4/Gm2a/Tnfrsf11a/Slco3a1/Lrp10/Scarb2/Osbpl8/Cert1
GO:0042755	eating behavior	27	0.65603	2.04175	0.000425212	0.0143128	Drd1/Adora2a/Oprk1/Oxtr/Tacr1/Oprm1
GO:0051282	regulation of sequestering of calcium ion	78	0.47811	1.88905	0.000437118	0.0146216	Drd2/Drd1/Htr2c/Ryr3/Pln/Tgfb2/Gstm2/Chd7/Ddit3/Hap1/Gstm7/Prkd1/Pkd2/Fgf2/Dbi/Abl1/Atg5/Tmem38b/Ibtk
GO:0072001	renal system development	251	0.346466	1.59606	0.000467259	0.0155327	Gfra1/Rarb/Gpc3/Sfrp1/Acta2/Mme/Dcn/Fgf1/Nid1/Sox11/Tgfb2/Ednrb/Car2/Sulf1/Bmp6/Ahi1/Lrrk2/Sox4/Itga8/Ptpro/Tiparp/Fgfr2/Notch2/Pdgfra/Vcan/Cfh/Dchs1/Ptch1/Aldh1a2/Hmgcs2/Gli3/Enpep/Rbp4/Nfia/Pkd2/Lgr5/Ass1/Bmp7/Mtss1/Bicc1/Ctsh/Aqp1/Prox1/Fgf2/Prkx/Bmp4/Tet2/Smad5/Sgce/Pecam1/Kank2/Sec61a1/Smo/Notch1/Ret/Plce1/Rhoa/Adamts1/Zmpste24/Klf15/Kirrel3/Fgfr1/Notch3/Flcn/Jag1/Smad4/Frem2/Nup160/Pkd1/Sdc…
GO:0048048	embryonic eye morphogenesis	22	0.691175	2.03286	0.000470384	0.0155401	Rarb/Sox11/Six3/Zeb1/Bmp7/Hipk2/Prox1/Sp1/Efemp1/Stra6/Lrp6/Pax6
GO:0010742	macrophage derived foam cell differentiation	11	0.835314	2.07719	0.000485562	0.0158459	Lpl/Prkch/Nfkbia/Csf1
GO:0090077	foam cell differentiation	11	0.835314	2.07719	0.000485562	0.0158459	Lpl/Prkch/Nfkbia/Csf1
GO:0071384	cellular response to corticosteroid stimulus	76	0.469931	1.84807	0.000500212	0.0162251	Nts/Sgk1/Foxo1/Plat/Ddit4/Stc1/Cbx3/Fbxo32/Zfp36/Errfi1/Eln/Hmgcs2/Zfp36l1/Ephx1/Ass1/Aqp1/Bmp4/Lmnb1/Rest/Rpl32/Hnrnpu/Igf1r/Zfp36l2
GO:0007043	cell-cell junction assembly	85	0.456145	1.8049	0.000505326	0.0162922	Ugt8/Prkch/Pard3/Cd9/Mpp7/Cldn11/Jam3/Ptpro/Cdh9/Itgb1/Pmp22/Cdh7/Dchs1/Pkp4/Cav1/Vcl/Gja1/Rhoc/Pak2/Rock1/Pecam1/Pkn2/Gjb6
GO:0007600	sensory perception	294	0.318204	1.50371	0.000511691	0.0163986	Drd2/Rgs9/Tac1/Htr2c/Penk/Gnal/Oprk1/Pdyn/Mme/Mbp/Zic2/Pou3f4/Lxn/Ednrb/Gstm2/Slc12a2/Gjc3/Trpm3/Olr769/Col1a1/Adra2c/Chd7/Tacr1/Myo6/Ano1/Oprm1/Grik2/Cfh/Ddit3/Lrig1/Rbp4/Fzd2/Tmtc4/Gpx1/Tmem100/B3gnt2/Cln5/Adgrv1/Sox2/Rtn4/Kcna1/Aqp1/Cdkn1b/Alms1/Nipbl/Col11a1/Zfhx2/Kcnj10/Ephb1/Rest/Sema5b/Scn3a/Serpinb6a/Axin1/Syt10/Rpgr/Cdc14a/Gjb6/Olr1584
GO:0006584	catecholamine metabolic process	41	0.580791	1.99703	0.000528635	0.0166581	Drd2/Drd1/Htr2c/Nr4a2/Pde1b/Gpr37/Tgfb2/Sult1a1/Sncaip/Atp7a/Abat
GO:0009712	catechol-containing compound metabolic process	41	0.580791	1.99703	0.000528635	0.0166581	Drd2/Drd1/Htr2c/Nr4a2/Pde1b/Gpr37/Tgfb2/Sult1a1/Sncaip/Atp7a/Abat
GO:0007204	positive regulation of cytosolic calcium ion concentration	185	0.368883	1.65624	0.000530671	0.0166581	Drd2/Drd1/Tac1/Htr2c/Adcy5/Ryr3/Gpr6/Pln/Lpar1/Oxtr/Tgfb2/Ednrb/Gstm2/Galr1/Ackr4/Chd7/Tacr1/Pdgfra/Oprm1/Slc8a3/Cd38/Ddit3/Hap1/Gstm7/Prkd1/Cav1/Fzd2/Pkd2/Gja1/Adcyap1r1/Fgf2/Dbi/Bmp4/Cd4/Ackr3/Abl1/Grm5/Atg5/Selenot/Fis1/C1qtnf1/Tmem38b/Tgm2/Akap5/Ibtk
GO:0051384	response to glucocorticoid	167	0.386417	1.7025	0.000532237	0.0166581	Nts/Gpx3/Sgk1/Foxo1/Plat/Ddit4/Mgp/Stc1/Igfbp2/Cbx3/Fbxo32/Bmp6/Zfp36/C3/Errfi1/Eln/Sparc/Ptgds/A2m/Hmgcs2/Fos/Sult1a1/Zfp36l1/Cav1/Ephx1/Ass1/Dusp1/Dpyd/Hnmt/Aqp1/Bmp4/Fn1/Kcnj10/Lmnb1/Rest/Rpl32/Hnrnpu/Mdk/Igf1r/Zfp36l2/Rhoa
GO:0035094	response to nicotine	51	0.53374	1.90826	0.0005405	0.0167411	Drd2/Drd1/Htr2c/Penk/Ppp1r1b/Igf2/Tacr1/Vcam1/Bag1/Lypd1/Slc7a11/Gpx1
GO:0007612	learning	163	0.389649	1.71643	0.000541147	0.0167411	Nts/Drd2/Drd1/Tac1/Ppp1r1b/Oprk1/Ap1s2/Gpr88/Sgk1/Pde1b/Drd5/Foxp2/Tacr1/Itgb1/Tanc1/Meis2/Slc8a3/Grm4/Slc7a11/Fos/Ptprz1
GO:0051954	positive regulation of amine transport	41	0.580568	1.99626	0.000545241	0.0167449	Drd2/Cartpt/Adora2a/Htr2c/Oprk1/Oxtr/Slc12a2/Pcp4/Itgb1
GO:0061041	regulation of wound healing	70	0.489285	1.89861	0.000547525	0.0167449	Prkcd/Acta2/Cd9/Serping1/Slc12a2/Kank1/Mylk/Enpp4/Pros1/Thbs1/Itgb1/Ano6/Pdgfra/Anxa2/Cav1/Gja1/Fgf2/Plpp3/Abat/Tnfrsf12a/C1qtnf1/Fermt2/Vkorc1
GO:0032060	bleb assembly	11	0.83069	2.06569	0.000566147	0.017216	Anln/Lpar1/Mylk/Emp3/Pmp22/Ano6/Rock1
GO:0033555	multicellular organismal response to stress	80	0.455359	1.80089	0.00058051	0.017553	Drd1/Tac1/Gng7/Htr2c/Penk/Nr4a2/Asic4/Ednrb/Tacr1/Thbs1/Grik2/Lypd1/Hmgcs2/Gja1/Adcyap1r1/Pde8b/Dbi
GO:0001501	skeletal system development	345	0.311997	1.49862	0.000609892	0.0183379	Rarb/Hhip/Sfrp1/Bgn/Dlk1/Hapln2/Sox11/Dlx5/Col1a2/Tgfb2/Mgp/Timp1/Stc1/Sulf1/Bmp6/Col1a1/Dlx2/Chd7/Col3a1/Sox4/Dlx1/Meis1/Tiparp/Thbs1/Trps1/Foxn3/Ccn2/Sparc/Mmp14/Fgfr2/Ano6/Notch2/Pdgfra/Anxa2/Vcan/Cfh/Dchs1/Papss2/Zeb1/Serpinh1/Gli3/Smpd3/Prrx1/Rbp4/Ptpn11/Atp7a/Gja1/Bmp7/Ccn1/Tjp2/Fgf2/Nipbl/Sp1/Bmp4/Col11a1/Smad5/Tgfbr2/Creb3l2/Itgb8/Megf8/Nbeal2/Mustn1/Axin1/Sfrp2/Pdgfc/Notch1/Trip11/Tmem38…
GO:0051235	maintenance of location	213	0.348566	1.58497	0.000618653	0.0184974	Drd2/Drd1/Htr2c/Lpl/Ryr3/Flna/Nfkbia/Pln/Gsn/Tgfb2/Gstm2/C3/Gaa/Ldaf1/Chd7/Cidea/Ddit3/Hap1/Gstm7/Prkd1/Cav1/Pkd2/Gja1/Plin2/Enpp1/Fgf2/Dbi/Akap9/Cd4/Abl1/Tbccd1/Atg5/Abhd5/Tmsb4x/Hnrnpu/Tmem38b/Ccdc88a/Ibtk
GO:0007588	excretion	32	0.60698	1.97528	0.000653961	0.019368	Drd2/Adora2a/Tac1/Dab2/Ednrb/Stc1/Tacr1
GO:0072503	cellular divalent inorganic cation homeostasis	307	0.318681	1.51377	0.000660163	0.019368	Drd2/Drd1/Tac1/Htr2c/Adcy5/Ryr3/Gpr6/Pln/Lpar1/Oxtr/Tgfb2/Trpc4/Ednrb/Gstm2/Stc1/Calb2/Trpc7/Galr1/Ackr4/Chd7/Tacr1/Inpp4b/Pdgfra/Oprm1/Grik2/Slc8a3/Cd38/Ddit3/Hap1/Gstm7/Smpd3/Prkd1/Cav1/Fzd2/Tmtc4/Pkd2/Gja1/Cav2/Adcyap1r1/Fgf2/Dbi/Bmp4/Trpm7/Il6st/Cd4/Ackr3/Pdzd8/Kcna5/Abl1/Grm5/Atg5/Slc30a10/Selenot/Fis1/C1qtnf1/Tmem38b/Fxyd1/Tgm2/Akap5/Ibtk/Gria1/Nalf2/Ap3b1/Pacs2/Casr
GO:0001822	kidney development	244	0.339324	1.55559	0.000662245	0.019368	Gfra1/Rarb/Gpc3/Sfrp1/Acta2/Mme/Dcn/Fgf1/Nid1/Sox11/Tgfb2/Ednrb/Car2/Sulf1/Bmp6/Ahi1/Lrrk2/Sox4/Itga8/Ptpro/Tiparp/Fgfr2/Notch2/Pdgfra/Vcan/Cfh/Dchs1/Ptch1/Aldh1a2/Hmgcs2/Gli3/Enpep/Pkd2/Ass1/Bmp7/Mtss1/Bicc1/Ctsh/Aqp1/Prox1/Fgf2/Prkx/Bmp4/Tet2/Smad5/Sgce/Pecam1/Kank2/Sec61a1/Smo/Notch1/Ret/Plce1/Rhoa/Adamts1/Zmpste24/Klf15/Kirrel3/Fgfr1/Notch3/Flcn/Jag1/Smad4/Frem2/Nup160/Pkd1/Sdc4/Stra6/Foxc1/A…
GO:0032970	regulation of actin filament-based process	304	0.317283	1.50491	0.000662245	0.019368	Tac1/Arhgap6/Prkcd/Acta2/Pard3/Flna/Pln/Lpar1/Gsn/Tgfb2/Abi3bp/Actn2/Rnd3/Stc1/Fzd10/Jam3/Kank1/Tacr1/Eln/Ap1ar/Ccn2/Arhgap18/Notch2/Alox15/Itgb1bp1/Prkcq/Cav1/Kank4/Mtss1/Rdx/Alms1/Rhoc/Prox1/Tmod3/Svil/Pak2/Akap9/Rock1/Rnd2/Arfip1/Arpc1b/Pde4b/Cgnl1/Rhog/Pecam1/Abl1/Ppfia1/Tnnt2/Cyfip1/Cdc42ep1/Celsr1/Csf1r/Kcnj2/Tmsb4x/Arap1/Fermt2/Ctnna3/Fxyd1/Iqgap1/Mdk/Ccdc88a/Lima1/Rhoa
GO:0007631	feeding behavior	73	0.484313	1.89144	0.000671161	0.019522	Drd2/Cartpt/Drd1/Adora2a/Htr2c/Oprk1/Oxtr/Tacr1/Oprm1/Fos
GO:0030534	adult behavior	144	0.401196	1.71875	0.000695275	0.0201141	Drd2/Cartpt/Drd1/Htr2c/Slc10a4/Ppp1r1b/Oprk1/Zic1/Nr4a2/Pbx3/Efnb3/Cnp/Chd7/Pmp22/Npc1/Oprm1/Inpp5f/Slc7a11
GO:1900273	positive regulation of long-term synaptic potentiation	29	0.614673	1.93859	0.000701358	0.0201678	Drd2/Drd1/Adora2a/Mme/Ptpn5
GO:0002092	positive regulation of receptor internalization	21	0.697436	2.00822	0.000704666	0.0201678	Drd2/Pard3/Dab2/Ahi1/Ptpn5
GO:0051209	release of sequestered calcium ion into cytosol	75	0.482305	1.89181	0.00072543	0.0206516	Drd2/Drd1/Htr2c/Ryr3/Pln/Tgfb2/Gstm2/Chd7/Ddit3/Hap1/Gstm7/Prkd1/Pkd2/Fgf2/Dbi/Abl1/Atg5/Tmem38b/Ibtk
GO:0042749	regulation of circadian sleep/wake cycle	13	0.777176	2.00817	0.000733852	0.0207808	Drd2/Drd1/Adora2a/Ptgds
GO:0009636	response to toxic substance	184	0.369147	1.65361	0.000764765	0.0215422	Drd2/Penk/Nr4a2/Hba-a3/Gpx3/Mbp/Gstm2/Chka/Cnp/Srsf9/Htr1d/Cdk4/Kdm6b/Ddit3/Slc7a11/Mgst1/Gstm7/Alox5ap/Fos/Sult1a1/Prdx1/Gpx1/Pdxk/Ephx1/Atp7a/Ass1/Dhx15/Gucy1a1/Selenow/Scn3a/Gsto2/Slc30a10/Selenot/Fis1/Sod2/Gria1/Pon2/Xpa/Gstt2/Cst3/Gpx8/Nfe2l2/Prdx3/Prdx6/Mtarc2/Sod3/Srd5a1/Prdx2/Sod1/Cdkn1a/Akr1b10/Nnt/Tgfbr1/Inhbb/Hif1a/Kdm5b/Gsta4
GO:0036293	response to decreased oxygen levels	297	0.316484	1.49516	0.000774464	0.0217012	Drd2/Drd1/Penk/Nr4a2/Prkcd/Apold1/Sfrp1/Tf/Plat/Ddit4/Oxtr/Tgfb2/Ndrg1/Stc1/Kcnmb1/Sox4/Nppa/Cryab/Eln/Ccn2/Nfatc3/Mmp14/Sdc2/Vcam1/Alas2/Slc8a3/Cd38/Tgfbr3/Adam17/Prkcq/Plekhn1/Zfp36l1/Bnip2/Cav1/Atp7a/Kcnk2/Sirt2/Rtn4/Npm1/Aqp1/Cdkn1b/Abat
GO:0031646	positive regulation of nervous system process	37	0.583917	1.95434	0.000789702	0.0220129	Cartpt/Tac1/Oprk1/Pard3/Myrf/Tf/Mag
GO:0022410	circadian sleep/wake cycle process	16	0.737471	1.99101	0.000821277	0.0227745	Drd2/Drd1/Adora2a/Ptgds
GO:1901652	response to peptide	443	0.289367	1.42565	0.000863969	0.0237311	Drd1/Oprk1/Lpl/Nr4a2/Prkcd/Vim/Sgk1/Foxo1/Nfkbia/Pln/Plat/Igf2/Oxtr/Actn2/Btg1/Klf2/Timp1/Ednrb/Car2/Erbb3/Col1a1/Timp4/Errfi1/Kank1/Nppa/Kat2b/Ano1/Ccn2/Sparc/Gatm/Vcam1/Cdk4/Inpp5f/Hmgcs2/Tgfbr3/Smpd3/Prkcq/Zfp36l1/Wdr6/Rbp4/Cav1/Fzd2/Ptpn11/Klf4/Gja1/Ass1/Bmp7/Enpp1/Cav2/Qdpr/Mtus1/Marcks/Stxbp3/Cdkn1b/Rock1/Lta4h/Sp1/Fn1/Fads1/Cacybp/Nucb2/Hadha/Cacna2d3/Sesn3/Prkaa1/Ggh/Grm5/Pnlip/Cyfip1/Slc…
GO:0007159	leukocyte cell-cell adhesion	177	0.365814	1.62379	0.000864644	0.0237311	Adora2a/Igf2/Nt5e/Igfbp2/Msn/Efnb3/Sox4/Efnb1/Thbs1/Itgb1/Lrrc32/Peli1/Vcam1/Wnk1/Cfh/Gli3/Tmem131l/Prkcq/Cav1/Chst2/Klf4/Ass1/Bmp7/Cd80/Bcl10/Rock1/Bmp4/Cd74/Il6st/Cd4/Tgfbr2/Nkap/Mir214/Pecam1/Jam2/Gpnmb/Pde5a/Tug1/Mdk/Rhoa/Sema4d/Ap3b1/B2m/Ripor2/Bmi1/Rps3/St3gal4/Il12a/Sdc4/Cd59/Prdx2
GO:0007271	synaptic transmission, cholinergic	18	0.721954	2.0087	0.000869598	0.0237454	Adora2a/Tac1/Htr2c/Slc5a7/Ache/Tacr1/Lypd1
GO:1905952	regulation of lipid localization	98	0.439149	1.77855	0.000876317	0.0238074	Tac1/Lpl/Prkcd/Nfkbia/Dab2/Galr1/Bmp6/C3/Thbs1/Apoc1/Cidea/Anxa2/Ptch1/Cav1/Ptpn11/Plin2/Abca2/Dbi/Nucb2/Hbp1/Abhd5/Fis1/C1qtnf1/Abca1/Ldlrap1/Tnfrsf11a
GO:0046717	acid secretion	33	0.600474	1.9726	0.000880951	0.0238124	Drd2/Cartpt/Htr2c/Oxtr/Trpc4
GO:0007178	transmembrane receptor protein serine/threonine kinase signaling pathway	243	0.341237	1.56414	0.000936609	0.0251786	Igsf1/Gpc3/Sfrp1/Vim/Tf/Sox11/Dlx5/Col1a2/Tgfb2/Zic2/Dab2/Sulf1/Bmp6/Rgma/Col3a1/Itga8/Fstl1/Dlx1/Thbs1/Trps1/Elapor2/Lrrc32/Notch2/Lats2/Cidea/Zeb1/Tgfbr3/Adam17/Fos/Smpd3/Snx25/Cav1/Tmem100/Bmp7/Cav2/Ccn1/Hipk2/Bmp4/Tcf7l2/Smad5/Neo1/Rbpms/Tgfbr2/Dusp15/Itgb8/Spart/Megf8/Abl1/Axin1/Sfrp2/Smurf2/Pals1/Notch1/Fermt2
GO:0071214	cellular response to abiotic stimulus	255	0.327056	1.51625	0.000947388	0.0251786	Rgs9/Prkcd/Gpr88/Sfrp1/Mme/Mag/Igf2/Timp1/Bmp6/Col1a1/Crip1/Errfi1/Nppa/Spidr/Myo6/Mylk/Cryab/Itgb1/Afap1/Mfap4/Net1/Zfp36l1/Cav1/Bag3/Ptpn11/Pkd2/Gadd45a/Gja1/Ybx3/Enpp1/Tank/Npm1/Aqp1/Rpl26/Nipbl/Bcl10/Bmp4/Map3k20/Rest/Serpinb6a/Sfrp2/Rpgr/Kcnj2/Igf1r/Xrcc6/Ddx3x/Zmpste24/Xpa/Usp47/Arhgdia/Tlr3/Ripor2/Ccnd2/Ep300/Slc24a2/Atp1a2/Eng/Slc38a2/Nedd4
GO:0104004	cellular response to environmental stimulus	255	0.327056	1.51625	0.000947388	0.0251786	Rgs9/Prkcd/Gpr88/Sfrp1/Mme/Mag/Igf2/Timp1/Bmp6/Col1a1/Crip1/Errfi1/Nppa/Spidr/Myo6/Mylk/Cryab/Itgb1/Afap1/Mfap4/Net1/Zfp36l1/Cav1/Bag3/Ptpn11/Pkd2/Gadd45a/Gja1/Ybx3/Enpp1/Tank/Npm1/Aqp1/Rpl26/Nipbl/Bcl10/Bmp4/Map3k20/Rest/Serpinb6a/Sfrp2/Rpgr/Kcnj2/Igf1r/Xrcc6/Ddx3x/Zmpste24/Xpa/Usp47/Arhgdia/Tlr3/Ripor2/Ccnd2/Ep300/Slc24a2/Atp1a2/Eng/Slc38a2/Nedd4
GO:0048568	embryonic organ development	290	0.321005	1.51585	0.000950312	0.0251786	Rarb/Pbx3/Dlx6/Ntn1/Sox11/Igf2/Dlx5/Six3/Tgfb2/Pou3f4/Gab1/Ahi1/Dlx2/Chd7/Itga8/Myo6/Gatm/Mmp14/Fgfr2/Notch2/Vcam1/Pdgfra/A2m/Ccdc39/Zeb1/Ptch1/Ddit3/Pls1/Aldh1a2/Gli3/Lrig1/Zfp36l1/Prrx1/Rbp4/Fzd2/Pkd2/Gja1/Bmp7/Sox2/Kat6a/Ccn1/Hipk2/Prox1/Nipbl/Sp1/Bmp4/Spint2/Col11a1/Tcf7l2/Tgfbr2/Rest/Nr2f2/Megf8/Tra2b/Axin1/Kitlg/Mbd2/Celsr1/Smo/Pdgfc/Gjb6/Notch1/Hspg2/Palld/Fgfr1/Gamt/Setd2/Ripor2/Bmi1/Rbbp…
GO:0044106	cellular amine metabolic process	70	0.476544	1.84917	0.000963614	0.0254052	Drd2/Drd1/Htr2c/Nr4a2/Pde1b/Gpr37/Tgfb2/Chka/Slc7a11/Sult1a1/Sncaip/Atp7a/Hnmt/Abat
GO:0002064	epithelial cell development	173	0.369884	1.62714	0.000991328	0.0260078	Rarb/Vim/Acta2/Pard3/Clic4/Flna/Hapln2/Six3/Bcl11b/Ednrb/Stc1/Msn/Bmp6/Fat1/Itgb1/Fgfr2/Notch2/Pls1/Hsd17b4/Map7/Col18a1/Vcl/Gpx1/Gja1/Rdx/Tjp2/Prox1/Akap9/Rock1/Bmp4/Spint2/Il6st/Rest/Pecam1/Smo/Arid4a/Notch1/Fndc3a/Ccdc88c/Palld/Arid4b/Fgfr1/Epb41l5/Cst3/Jag1/Ripor2
GO:0048736	appendage development	131	0.403931	1.71388	0.00102857	0.0266479	Rarb/Kremen1/Gpc3/Dlx6/Sox11/Dlx5/Tgfb2/Sp9/Sulf1/Chd7/Col3a1/Sox4/Fgfr2/Notch2/Ptch1/Slc7a11/Aldh1a2/Gli3/Prrx1/Gna12/Atp7a/Gja1/Bmp7/Nipbl/Bmp4/Map3k20/Nr2f2/Megf8/Mustn1/Sfrp2/Notch1/Fermt2/Reck/Fgfr1/Mbnl1/Smad4/Frem2/Asph/Itga6/Ift140/Alx3/Lrp6/Rpgrip1l/Chst11/Traf3ip1
GO:0060173	limb development	131	0.403931	1.71388	0.00102857	0.0266479	Rarb/Kremen1/Gpc3/Dlx6/Sox11/Dlx5/Tgfb2/Sp9/Sulf1/Chd7/Col3a1/Sox4/Fgfr2/Notch2/Ptch1/Slc7a11/Aldh1a2/Gli3/Prrx1/Gna12/Atp7a/Gja1/Bmp7/Nipbl/Bmp4/Map3k20/Nr2f2/Megf8/Mustn1/Sfrp2/Notch1/Fermt2/Reck/Fgfr1/Mbnl1/Smad4/Frem2/Asph/Itga6/Ift140/Alx3/Lrp6/Rpgrip1l/Chst11/Traf3ip1
GO:0006814	sodium ion transport	146	0.390039	1.67802	0.00103192	0.0266479	Drd2/Slc10a4/Slc5a7/Scn4b/Asic4/Sgk1/Fgf11/Slc6a20/Sik1/Ednrb/Slc12a2/Cnksr3/Slc6a9/Slc6a13/Slc4a4/Nkain3/Slc13a4/Ano6/Wnk1/Slc13a3/Slc8a3/Atp1b3/Kif5b/Pkd2/Slc20a2/Slc5a11/Atp1b2/Slc17a6
GO:1905954	positive regulation of lipid localization	64	0.491985	1.85549	0.00103777	0.0266479	Tac1/Lpl/Prkcd/Nfkbia/Dab2/Galr1/Bmp6/C3/Cidea/Anxa2/Ptch1/Cav1/Plin2/Dbi/Nucb2/C1qtnf1/Abca1/Ldlrap1/Tnfrsf11a
GO:0045187	regulation of circadian sleep/wake cycle, sleep	11	0.812251	2.01984	0.00104062	0.0266479	Drd2/Drd1/Adora2a/Ptgds
GO:0071496	cellular response to external stimulus	277	0.320799	1.5065	0.00106065	0.0270314	Cartpt/Penk/Lpl/Nr4a2/Prkcd/Sfrp1/Foxo1/Mag/Igf2/Sik1/Bmp6/Col1a1/Lrrk2/Nppa/Eln/Itgb1/Afap1/Vcam1/Pik3c2a/Folr2/Fos/Pik3c2b/Prkd1/Cav1/Lamp2/Xpr1/Fzd2/Bag3/Ptpn11/Gadd45a/Gja1/Enpp1/Aqp1/Tnrc6a/Dbi/Tnks/Bcl10/Bmp4/Tcf7l2/Fads1/Hnrnpa1/Sesn3/Prkaa1/Kank2/Sfrp2/Atg5/Kcnj2/Pdia3/Igf1r/Adamts1/Jun/Casr/Sh3glb1/Arhgdia/Tlr3/Ctsl/Flcn/Ripor2/Nfe2l2/Itga6/Atp1a2/Eng/Slc38a2/Srd5a1/Gclc/Cdkn1a/Dcps/Nim1…
GO:0030199	collagen fibril organization	36	0.563875	1.88361	0.00106653	0.0270525	Fmod/Col1a2/Tgfb2/Aebp1/Col1a1/Col3a1/Anxa2/Serpinh1/Atp7a/Crtapl1/Col11a1/Sfrp2/Adamts2/Rb1/P3h1/Foxc1
GO:0050708	regulation of protein secretion	207	0.339366	1.54941	0.00113022	0.0285076	Drd2/Cartpt/Adora2a/Nnat/Adcy5/Sfrp1/Tgfb2/Syt9/Slc12a2/Doc2b/Ahi1/Sox4/Map4k4/Ano1/Baiap3/Myt1/Oprm1/Cd38/Prkcq/Rbp4/Kif5b/Ptpn11/Gja1/Pde8b/Abat/Tcf7l2/Arfip1/Neo1/Slc16a1/Rest
GO:0044344	cellular response to fibroblast growth factor stimulus	78	0.461061	1.82169	0.00113455	0.0285076	Hhip/Sfrp1/Vim/Fgf1/Sulf1/Zfp36/Col1a1/Eln/Thbs1/Ccn2/Fgfr2/Pdgfra/Itgb1bp1/Zfp36l1/Ptpn11/Fgf2/Creb3l1/Tcf7l2
GO:1902043	positive regulation of extrinsic apoptotic signaling pathway via death domain receptors	14	0.751593	1.98366	0.00114601	0.028661	Sfrp1/Mal/Timp3/Thbs1/Trps1
GO:0060134	prepulse inhibition	15	0.748839	1.99943	0.00116471	0.0289932	Drd2/Adora2a/Fabp7
GO:0035924	cellular response to vascular endothelial growth factor stimulus	47	0.530946	1.87742	0.00117684	0.0290244	Nrp2/Dcn/Gab1/Jcad/Vcam1/Pdgfra/Itgb1bp1/Prkd1/Fn1/Cd63/Sema6a/Tspan12/Adamts3/Notch1/Il12a/Map2k3/Foxc1
GO:0031000	response to caffeine	25	0.633284	1.94079	0.00118058	0.0290244	Adora2a/Gnal/Gstm2/Sdc2/Gstm7/Prkaa1/Tmem38b/Entpd1/Slc8a1/Selenon
GO:1903539	protein localization to postsynaptic membrane	51	-0.521308	-1.82948	0.00118223	0.0290244	Magi2/Prkcz/Rapgef4/Dlg4/Arhgap44/Grin1/Zdhhc2/Git1/Iqsec2/Camk2a/Kalrn/Mapk10/Gpc6/Cacng2/Stx3/Nptx1/Clstn1/Snap47/Lgi1/Grin2a/Nptx2/Nptxr/Cnih3/Cacng3/Tamalin
GO:0030336	negative regulation of cell migration	204	0.336652	1.53363	0.0012312	0.0300051	Drd2/Drd1/Mctp1/Sfrp1/Clic4/Dcn/Apod/Drd5/Timp1/Stc1/Sulf1/Col3a1/Kank1/Sema6d/Thbs1/Plxnb3/Itgb1bp1/Cers2/Tgfbr3/Gna12/Klf4/Gadd45a/Gja1/Dusp1/Adamts9/Fgf2/Srgap1/Atp1b2/Cd74/Cd63/Adipor2/Stard13/Nr2f2/Padi2/Sfrp2/Notch1/Adipor1/Reck/Rhoa/Tcaf1/Arhgdia/Flcn/Osbpl8/Jag1/Ripor2
GO:0070371	ERK1 and ERK2 cascade	217	0.334963	1.52876	0.00123339	0.0300051	Drd2/Htr2c/Acta2/Tf/Fgf1/Oxtr/Dab2/Timp3/Cnksr3/Pde8a/C3/Necab2/Errfi1/Ccn2/Dcc/Fgfr2/Notch2/Alox15/Pdgfra/Oprm1/Itgb1bp1/Adam17/Zfp36l1/Cav1/Ptpn11/Klf4/Dusp1/Mfhas1/Ccn1/Ctsh/Fgf2/Bmp4/Fn1/Cd74/Cd4/Ackr3/Dusp15/Ephb1/Sema6a/Abl1/Csf1r/Slc30a10/Pdgfc/Notch1/Fermt2/Gpnmb/Zfp36l2/Dusp4/Tnfrsf11a/Jun/Casr
GO:0051651	maintenance of location in cell	145	0.379714	1.63218	0.00126565	0.0305354	Drd2/Drd1/Htr2c/Ryr3/Pln/Gsn/Tgfb2/Gstm2/Gaa/Chd7/Ddit3/Hap1/Gstm7/Prkd1/Cav1/Pkd2/Gja1/Fgf2/Dbi/Akap9/Cd4/Abl1/Tbccd1/Atg5/Tmsb4x/Hnrnpu/Tmem38b/Ccdc88a/Ibtk
GO:0050802	circadian sleep/wake cycle, sleep	15	0.746935	1.99435	0.00127156	0.0305354	Drd2/Drd1/Adora2a/Ptgds
GO:0046879	hormone secretion	235	0.335268	1.53563	0.00127638	0.0305354	Drd2/Cartpt/Tac1/Htr2c/Nnat/Oprk1/Adcy5/Sfrp1/Sox11/Syt9/Dab2/Doc2b/Galr1/Bmp6/Chd7/Sox4/Tacr1/Nppa/Map4k4/Ano1/Baiap3/Myt1/Cd38/Smpd3/Rbp4/Kif5b/Ptpn11/Gja1/Cplx3/Pde8b/Stxbp3/Aqp1/Abat/Tcf7l2/Nucb2/Il6st/Slc16a1/Rest
GO:0062237	protein localization to postsynapse	52	-0.505959	-1.78336	0.00127801	0.0305354	Magi2/Prkcz/Rapgef4/Dlg4/Arhgap44/Grin1/Zdhhc2/Git1/Iqsec2/Camk2a/Kalrn/Mapk10/Gpc6/Cacng2/Stx3/Nptx1/Clstn1/Snap47/Lgi1/Grin2a/Nptx2/Nptxr/Cnih3/Cacng3/Tamalin
GO:0030431	sleep	24	0.629476	1.90677	0.0012873	0.0306205	Drd2/Drd1/Adora2a/Oxtr/Ptgds/Fos
GO:0071875	adrenergic receptor signaling pathway	25	0.630352	1.93181	0.00132948	0.0314839	Drd2/Gpr101/Pln/Drd5/Adra2c/Rgs2/Arrdc3
GO:0042053	regulation of dopamine metabolic process	19	0.685278	1.93996	0.00139514	0.0327737	Drd1/Htr2c/Nr4a2/Pde1b/Gpr37
GO:0051271	negative regulation of cellular component movement	220	0.340512	1.55948	0.00139692	0.0327737	Drd2/Drd1/Mctp1/Sfrp1/Clic4/Dcn/Apod/Cd9/Drd5/Timp1/Stc1/Sulf1/Col3a1/Kank1/Sema6d/Ap1ar/Thbs1/Plxnb3/Itgb1bp1/Cers2/Tgfbr3/Gna12/Klf4/Gadd45a/Gja1/Dusp1/Adamts9/Cdkn1b/Fgf2/Srgap1/Spint2/Atp1b2/Cd74/Cd63/Adipor2/Stard13/Nr2f2/Padi2/Sfrp2/Notch1/Adipor1/Reck/Rhoa/Tcaf1/Arhgdia/Flcn/Osbpl8/Jag1/Ripor2
GO:0006576	cellular biogenic amine metabolic process	64	0.480881	1.81362	0.00140231	0.0327737	Drd2/Drd1/Htr2c/Nr4a2/Pde1b/Gpr37/Tgfb2/Chka/Sult1a1/Sncaip/Atp7a/Hnmt/Abat
GO:0060401	cytosolic calcium ion transport	124	0.396863	1.67466	0.00143489	0.0333894	Drd2/Rgs9/Drd1/Htr2c/Ryr3/Pln/Tgfb2/Gstm2/Chd7/Ccn2/Slc8a3/Ddit3/Hap1/Gstm7/Prkd1/Cav1/Pkd2/Adcyap1r1/Fgf2/Dbi/Bmp4/Cd4/Abl1/Atg5/Tmem38b/Akap5/Ibtk
GO:0030278	regulation of ossification	83	0.448606	1.77355	0.00145319	0.0336686	Tac1/Kremen1/Sfrp1/Sox11/Tgfb2/Mgp/Bmp6/Tacr1/Ano6/Csf1/Ptpn11/Gja1/Bmp7/Enpp1/Adgrv1/Ccn1/Nipbl/Creb3l1/Bmp4/Smad5
GO:0072576	liver morphogenesis	20	0.678952	1.93028	0.00145954	0.03367	Mki67/Fgf1/Notch2/Tgfa/Rtn4/Prox1/Tet2/Lims1/Mdk
GO:0032094	response to food	30	0.601094	1.91026	0.00147075	0.0336798	Cartpt/Drd1/Ahi1/Oprm1/Slc25a25/Pdxk/Bcl10/Nucb2/Slc16a1
GO:2001235	positive regulation of apoptotic signaling pathway	110	0.417367	1.73288	0.00147988	0.0336798	Adora2a/Prkcd/Sfrp1/Mal/Tgfb2/Timp3/Thbs1/Trps1/Unc5b/Ddit3/Cav1/Ctsc/Ctsh/Eef1e1/Rpl26/Bcl10/Pak2/Mcl1/Tnfrsf12a/Septin4/Fis1/Pdia3/Ret/Tpd52l1/Sh3glb1/Flcn/Sfpq/Bcap31/Rps3/Sod1/Jak2/Bok/Agt/Tgfbr1/Ctnna1/Inhbb
GO:0048755	branching morphogenesis of a nerve	11	0.800995	1.99185	0.00148466	0.0336798	Drd2/Lrrk2/Dlx2/Fgfr2/Rtn4
GO:0050795	regulation of behavior	60	0.495191	1.8324	0.00148513	0.0336798	Drd2/Drd1/Adora2a/Penk/Oprk1/Ahi1/Htr1d/Baiap3/Ptgds/Arrdc3
GO:0014013	regulation of gliogenesis	91	0.437084	1.7573	0.00150503	0.033987	Vim/Prkch/Tf/Sox11/Mag/Ezh2/Enpp2/Dlx2/Id4/Olig2/Aspa/Dlx1/Sox10/Tmem98/Bag1/Cers2/Nkx6-2/Ptprz1/Sirt2/Rtn4/Qk/Bmp4/Il6st/Ppp1cc
GO:0042330	taxis	358	0.296393	1.43354	0.00151795	0.0341347	Nexn/Prkcd/Nrp2/Fgf1/Lpar1/Ntn1/Dlx5/Bcl11b/Tgfb2/Zic2/Ch25h/Gab1/Vav3/Ednrb/Slc12a2/Enpp2/Efnb3/Ackr4/C3/Scg2/Jam3/Sema6d/Vax1/Ptpro/Efnb1/Thbs1/Unc5d/Dcc/Ano6/Hmgb2/Plxnb3/Vcam1/Pdgfra/Wnk1/Prok2/Unc5b/Csf1/Enah/Ptch1/Gli3/Adam17/Alkbh1/Prkcq/Alcam/Prkd1/Kif5b/B3gnt2/Gja1/Bmp7/Draxin/Dusp1/Mospd2/Mtus1/Ccn1/Fgf2/Bmp4/Myo9b/Fn1/Cd74/Neo1/Plgrkt/Ackr3/Ephb1/Pde4b/Sema5b/Rhog/Megf8/Sema6a/Padi2/Cy…
GO:0010959	regulation of metal ion transport	301	0.312563	1.48282	0.00154216	0.0345342	Drd2/Rgs9/Drd1/Adora2a/Oprk1/Scn4b/Sgk1/Flna/Tf/Pln/Fgf11/Tgfb2/Sik1/Actn2/Trpc4/Gstm2/Stc1/Cnksr3/Slc6a9/Plp1/Chd7/Kcnmb1/Nppa/Mylk/Itgb1/Nfatc3/Nkain3/Ano6/Wnk1/Pik3c2a/Hap1/Gstm7/Prkd1/Cav1/Atp1b3/Kif5b/Epb41/Kcnab1/Pkd2/Atp7a/Gja1/Adcyap1r1/Kcna1/Cd84/Dbi/Akap9/Bmp4/Atp1b2/Cd4/Cd63/Pde4b/Hbp1/Kcna5/Abl1/Atg5/Kcnj2/Slc30a10
GO:0016572	histone phosphorylation	30	0.600413	1.9081	0.0015781	0.0351917	Drd1/Ppp1r1b/Prkcd/Rps6ka5
GO:0042745	circadian sleep/wake cycle	20	0.674664	1.91809	0.00158927	0.0352937	Drd2/Drd1/Adora2a
GO:2000463	positive regulation of excitatory postsynaptic potential	34	-0.560892	-1.80987	0.00163335	0.0361228	Shank1/Nlgn3/Prkcz/Dlg4/Baiap2/Rims1/Grin1/Dvl1/Grk2/Tbc1d24/Chrna7/Grin2a/Cacnb3/Reln/Cux2/Rgs4/Stx1a
GO:0071548	response to dexamethasone	55	0.508025	1.85323	0.00165534	0.0364584	Nts/Foxo1/Plat/Ddit4/Cbx3/Fbxo32/Errfi1/Eln/Ass1/Aqp1/Bmp4/Rpl32/Hnrnpu/Igf1r/Bmi1/Ep300/Srd5a1/Jak2/Pcna/Nr3c1/Icam1
GO:0033238	regulation of cellular amine metabolic process	28	0.629269	1.97967	0.00168717	0.0370071	Drd1/Htr2c/Nr4a2/Pde1b/Gpr37/Slc7a11/Atp7a/Abat
GO:0001666	response to hypoxia	280	0.314444	1.47811	0.00169623	0.037054	Drd2/Drd1/Penk/Nr4a2/Prkcd/Apold1/Sfrp1/Tf/Plat/Ddit4/Tgfb2/Ndrg1/Stc1/Kcnmb1/Sox4/Nppa/Cryab/Eln/Nfatc3/Mmp14/Sdc2/Vcam1/Alas2/Slc8a3/Cd38/Tgfbr3/Adam17/Prkcq/Plekhn1/Zfp36l1/Cav1/Atp7a/Kcnk2/Sirt2/Rtn4/Npm1/Aqp1/Cdkn1b/Abat/Tgfbr2/Rest/Prkaa1/Kcna5/Fis1/Notch1/Sod2/Pdia3/Hspg2/Pde5a
GO:1900271	regulation of long-term synaptic potentiation	51	0.504983	1.80545	0.00170329	0.0370569	Drd2/Drd1/Adora2a/Mme/Calb2/Ptpn5
GO:0044057	regulation of system process	433	0.292727	1.44299	0.00171902	0.0372283	Drd2/Cartpt/Drd1/Adora2a/Tac1/Htr2c/Oprk1/Scn4b/Cacna2d2/Pbx3/Asb15/Pard3/Foxo1/Myrf/Tf/Pln/Mag/Shisa6/Oxtr/Tgfb2/Dab2/Ednrb/Stc1/Fbxo32/Galr1/Bmp6/Lrrk2/Gaa/Adra2c/Errfi1/Tacr1/Nppa/Ptpro/Ccn2/Rgs2/Arhgap42/Sox10/Cacng5/Tmem98/Wnk1/Oprm1/Prok2/Slc8a3/Cd38/Prkcq/Cav1/Epb41/Ptpn11/Tmem100/Klf4/Gja1/Ctsc/Rtn4/Kcna1/Aqp1/Gtf2ird1/Abat/Cacng4/Tomm70/Gucy1a1/Akap9/Rock1/Zfhx2/Kcnj10/Pde4b/Kcna5/Abl1/T…
GO:0015695	organic cation transport	26	0.617003	1.89764	0.0017284	0.0372283	Adora2a/Htr2c/Slc5a7/Slc44a1
GO:0014074	response to purine-containing compound	147	0.360104	1.55772	0.00173203	0.0372283	Adora2a/Penk/Gnal/Tf/Plat/Gstm2/Stc1/Col1a1/Sparc/Sdc2/Slc8a3/Mat2a/Pde3a/Hmgcs2/Gstm7/Fos/Zfp36l1/Pkd2/Ass1/Enpp1/Dusp1/Crem/Aqp1/Akap9/Prkaa1/Tmem38b/Jun/Fdx1/Entpd1/Ccnd2/Ep300/Slc8a1/Asph/Selenon/Rap1a/Srd5a1/Ssh1/Sod1/Itpr2/Apex1/Aqp9/Inhbb/Hif1a/Top1/Ndufs4/Hspd1
GO:0050796	regulation of insulin secretion	135	0.388677	1.65218	0.00174322	0.0372346	Drd2/Cartpt/Nnat/Adcy5/Sfrp1/Syt9/Doc2b/Sox4/Map4k4/Ano1/Baiap3/Myt1/Cd38/Rbp4/Kif5b/Ptpn11/Gja1/Pde8b/Abat/Tcf7l2/Slc16a1/Rest
GO:0048546	digestive tract morphogenesis	32	0.582349	1.89513	0.00174888	0.0372346	Sfrp1/Sox11/Ahi1/Fgfr2/Sox10/Pdgfra/Gli3/Nipbl/Bmp4/Tcf7l2/Sfrp2/Stx2/Notch1/Epb41l5/Stra6/Foxp4
GO:0061564	axon development	415	0.283625	1.39822	0.0017532	0.0372346	Drd2/Nexn/Nr4a2/Nrp2/Kremen1/Vim/Flna/Ntn1/Ache/Mag/Dlx5/Mbp/Bcl11b/Apod/Tspan2/Tgfb2/Zic2/Myo5b/Efnb3/Erbb3/Kif13b/Cnp/Plp1/Jam3/Rgma/Ddr1/Sema6d/Vax1/Ptpro/Efnb1/Ntng1/Itgb1/Pmp22/Unc5d/Dcc/Fgfr2/Plxnb3/Inpp5f/Vcan/Unc5b/Cers2/Enah/Ptch1/Gli3/Adam17/Alcam/Ptprz1/Vcl/Kif5b/Ptpn11/B3gnt2/Klf4/Bmp7/Draxin/Ust/Trim32/Nefh/Rtn4/Dynlt1/Ntng2/Pak2/Rnd2/Fn1/Neo1/Picalm/Ephb1/Spart/Sema5b/Rhog/Megf8/Tnf…
GO:2000146	negative regulation of cell motility	212	0.336884	1.53084	0.00176952	0.0374327	Drd2/Drd1/Mctp1/Sfrp1/Clic4/Dcn/Apod/Drd5/Timp1/Stc1/Sulf1/Col3a1/Kank1/Sema6d/Ap1ar/Thbs1/Plxnb3/Itgb1bp1/Cers2/Tgfbr3/Gna12/Klf4/Gadd45a/Gja1/Dusp1/Adamts9/Fgf2/Srgap1/Spint2/Atp1b2/Cd74/Cd63/Adipor2/Stard13/Nr2f2/Padi2/Sfrp2/Notch1/Adipor1/Reck/Rhoa/Tcaf1/Arhgdia/Flcn/Osbpl8/Jag1/Ripor2
GO:0014015	positive regulation of gliogenesis	59	0.480597	1.77892	0.00178523	0.0376164	Vim/Prkch/Tf/Mag/Enpp2/Olig2/Aspa/Sox10/Bag1/Nkx6-2/Ptprz1/Rtn4/Qk/Il6st/Ppp1cc/Notch1/Mdk
GO:0198738	cell-cell signaling by wnt	301	0.310735	1.47414	0.00179683	0.0377122	Drd2/Kremen1/Gpc3/Sfrp1/Foxo1/Dlx5/Six3/Shisa6/Strn/Dab2/Ednrb/Fzd10/Sulf1/Col1a1/Lrrk2/Kank1/Sox4/Nppa/Ptpro/Fgfr2/Sox10/Lats2/Wnk1/Oprm1/Ddit3/Gli3/Tmem131l/Cav1/Fzd2/Pkd2/Klf4/Lgr5/Rbms3/Draxin/Ubr5/Bicc1/Sox2/Gprc5b/Fgf2/Tnks/Plpp3/Tcf7l2/Mesd/Tle4/Prkaa1/Hbp1/Abl1/Axin1/Sfrp2/Mbd2/Celsr1/Lrrfip2/Notch1/Fermt2/Ccdc88c/Reck/Mdk/Tcf7l1/Ddx3x/Otulin/Klf15/Usp47/Xiap
GO:0030509	BMP signaling pathway	102	0.411469	1.67936	0.00181201	0.0378823	Gpc3/Sfrp1/Sox11/Dlx5/Tgfb2/Sulf1/Bmp6/Rgma/Fstl1/Dlx1/Elapor2/Notch2/Tgfbr3/Smpd3/Cav1/Tmem100/Bmp7/Ccn1/Hipk2/Bmp4/Tcf7l2/Smad5/Neo1/Spart/Megf8/Abl1/Sfrp2/Smurf2/Notch1
GO:0046850	regulation of bone remodeling	39	0.529401	1.79451	0.00184892	0.0385036	Cartpt/Sfrp1/Dlk1/Tf/Car2/Inpp4b/Cd38/Gja1/Gpr137b/Csf1r/Mdk/Tnfrsf11a
GO:0010810	regulation of cell-substrate adhesion	166	0.36061	1.59038	0.00185767	0.0385358	Arhgap6/Flna/Nid1/Apod/Abi3bp/Dab2/Egfl6/Enpp2/Col1a1/Ddr1/Kank1/Map4k4/Ap1ar/Thbs1/Itgb1/Mmp14/Net1/Alox15/Itgb1bp1/Csf1/Ptprz1/Vcl/Ptpn11/Ecm2/Ccn1/Rock1/Fn1/Abl1/Lims1/Notch1/Fermt2/Iqgap1/Mdk/Rhoa/P4hb/Epb41l5/Jag1/Utrn/Peak1/Itga6/Carmil1/Sdc4/Cdc42/Rin2/Npy
GO:0006935	chemotaxis	355	0.297545	1.43517	0.00186757	0.0385916	Nexn/Prkcd/Nrp2/Fgf1/Lpar1/Ntn1/Dlx5/Bcl11b/Tgfb2/Zic2/Ch25h/Gab1/Vav3/Ednrb/Slc12a2/Enpp2/Efnb3/Ackr4/C3/Scg2/Jam3/Sema6d/Vax1/Ptpro/Efnb1/Thbs1/Unc5d/Dcc/Ano6/Hmgb2/Plxnb3/Vcam1/Pdgfra/Wnk1/Prok2/Unc5b/Csf1/Enah/Ptch1/Gli3/Adam17/Alkbh1/Prkcq/Alcam/Prkd1/Kif5b/B3gnt2/Gja1/Bmp7/Draxin/Dusp1/Mospd2/Mtus1/Ccn1/Fgf2/Bmp4/Myo9b/Fn1/Cd74/Neo1/Plgrkt/Ackr3/Ephb1/Pde4b/Sema5b/Rhog/Megf8/Sema6a/Padi2/Cy…
GO:0009914	hormone transport	240	0.326421	1.49129	0.0018993	0.0390964	Drd2/Cartpt/Tac1/Htr2c/Nnat/Oprk1/Adcy5/Sfrp1/Sox11/Syt9/Dab2/Doc2b/Galr1/Bmp6/Chd7/Sox4/Tacr1/Nppa/Map4k4/Ano1/Baiap3/Myt1/Cd38/Smpd3/Rbp4/Kif5b/Ptpn11/Gja1/Cplx3/Pde8b/Stxbp3/Aqp1/Abat/Tcf7l2/Nucb2/Il6st/Slc16a1/Rest
GO:0010942	positive regulation of cell death	468	0.280729	1.39237	0.00194526	0.039889	Adora2a/Tac1/Rarb/Prkcd/Hba-a3/Sfrp1/Foxo1/Mal/Lpar1/Gsn/Ddit4/Tgfb2/Sik1/Btg1/Timp3/Slc6a13/Fbxo32/Lrrk2/Txnip/Sox4/Ptpn5/Folh1/Thbs1/Trps1/Itgb1/Ccn2/Ano6/Net1/Notch2/Cdk4/Lats2/Grik2/Bag1/Unc5b/Phlda1/Ddit3/Aldh1a2/Adam17/Fos/Plekhn1/Ptprz1/Col18a1/Cav1/Uaca/Gadd45a/Kcnk2/Bmp7/Dusp1/Ctsc/Sirt2/Ccn1/Rrp1b/Ctsh/Cdkn1b/Eef1e1/Rpl26/Bcl10/Pak2/Bmp4/Map3k20/Trpm7/Tcf7l2/Mcl1/Picalm/Rest/Tnfrsf12a/A…
GO:0071774	response to fibroblast growth factor	83	0.442444	1.74919	0.00199664	0.0407864	Hhip/Sfrp1/Vim/Fgf1/Sulf1/Zfp36/Col1a1/Eln/Thbs1/Ccn2/Fgfr2/Pdgfra/Itgb1bp1/Zfp36l1/Ptpn11/Fgf2/Creb3l1/Tcf7l2/Iqgap1/Zfp36l2/Casr/Fgfr1/Ofd1
GO:0006816	calcium ion transport	276	0.312629	1.46733	0.00200463	0.0407939	Drd2/Rgs9/Drd1/Adora2a/Htr2c/Cacna2d2/Ryr3/Pln/Tgfb2/Trpc4/Ednrb/Gstm2/Stc1/Trpc7/Plp1/Chd7/Nppa/Mylk/Ccn2/Nfatc3/Ano6/Cacng5/Anxa2/Oprm1/Slc8a3/Ddit3/Hap1/Gstm7/Prkd1/Slc25a25/Cav1/Epb41/Pkd2/Gja1/Adcyap1r1/Cd84/Fgf2/Dbi/Cacng4/Bmp4/Trpm7/Cd4/Cacna2d3/Pde4b/Bspry/Abl1/Atg5/Sec61a1
GO:0001101	response to acid chemical	158	0.357763	1.5682	0.00201804	0.0409111	Drd1/Prkcd/Col1a2/Glra2/Cd9/Klf2/Timp3/Myo5b/Col1a1/Col3a1/Ccn2/Mir134/Pdgfra/Bag1/Zeb1/Hmgcs2/Col18a1/Atp6v0e1/Pkd2/Atp7a/Ass1/Cdkn1b/Tomm70
GO:0002011	morphogenesis of an epithelial sheet	45	0.524045	1.82999	0.00203859	0.0410176	Pard3/Flna/Sox11/Ddr1/Notch2/Adam17/Bmp7/Arhgap24/Ccn1/Rhoc/Megf8/Pals1/Notch1/Fermt2/Rhoa/Jag1/Lrp6/Ceacam1/Flrt3/Cd151/Wnt7a
GO:0022600	digestive system process	48	0.499515	1.75889	0.00203862	0.0410176	Cartpt/Tac1/Oprk1/Oxtr/Tacr1/Wnk1/Pls1/Rbp4/Epb41/Aqp1/Tjp2/Dbi
GO:0010563	negative regulation of phosphorus metabolic process	332	0.29487	1.41707	0.00206501	0.0410616	Drd2/Drd1/Adora2a/Ppp1r1b/Prkcd/Sfrp1/Pard3/Ddit4/Tgfb2/Drd5/Cnksr3/Pcp4/Lrrk2/Errfi1/Nppa/Kat2b/Ptpn5/Ptpro/Ctdsp1/Rgs2/Apoc1/Lats2/Wnk1/Inpp5f/Itgb1bp1/Bag1/Slc8a3/Snx25/Cav1/Gadd45a/Bmp7/Enpp1/Dusp1/Sirt2/Mfhas1/Npm1/Cdkn1b/Abca2/Plpp3/Rock1/Bmp4/Nr2f2/Pecam1/Abl1/Sfrp2/Hnrnpu/Dnaja1/Pip4k2a/Iqgap1/Ibtk/Prkar2b/Sema4d/Atxn7/Jun/Ppp1r9b/Stk38/Entpd1/Flcn/Gnai2/Rb1/Slc8a1/Prdx3/Eng/Lats1/Ppp1r36…
GO:0045936	negative regulation of phosphate metabolic process	332	0.29487	1.41707	0.00206501	0.0410616	Drd2/Drd1/Adora2a/Ppp1r1b/Prkcd/Sfrp1/Pard3/Ddit4/Tgfb2/Drd5/Cnksr3/Pcp4/Lrrk2/Errfi1/Nppa/Kat2b/Ptpn5/Ptpro/Ctdsp1/Rgs2/Apoc1/Lats2/Wnk1/Inpp5f/Itgb1bp1/Bag1/Slc8a3/Snx25/Cav1/Gadd45a/Bmp7/Enpp1/Dusp1/Sirt2/Mfhas1/Npm1/Cdkn1b/Abca2/Plpp3/Rock1/Bmp4/Nr2f2/Pecam1/Abl1/Sfrp2/Hnrnpu/Dnaja1/Pip4k2a/Iqgap1/Ibtk/Prkar2b/Sema4d/Atxn7/Jun/Ppp1r9b/Stk38/Entpd1/Flcn/Gnai2/Rb1/Slc8a1/Prdx3/Eng/Lats1/Ppp1r36…
GO:0070302	regulation of stress-activated protein kinase signaling cascade	139	0.371761	1.58358	0.0020673	0.0410616	Oprk1/Sh3rf2/Sfrp1/Foxo1/Tgfb2/Dab2/Nppa/Map4k4/Ccn2/Grik2/Fgd4/Prdx1/Rnf13/Gadd45a/Dusp1/Mfhas1/Hipk2/Bmp4/Dusp15/Klhdc10/Ephb1/Axin1/Sfrp2/Zfp110/Tnik/Dnaja1/Mid1/Igf1r/Tpd52l1/Zmpste24
GO:0034764	positive regulation of transmembrane transport	183	0.346635	1.55699	0.00207149	0.0410616	Rgs9/Drd1/Oprk1/Prkcd/Gpc3/Flna/Actn2/Gstm2/Car2/Cnksr3/Slc6a9/Erbb3/C3/Plp1/Kcnmb1/Nppa/Itgb1/Ano6/Wnk1/Hap1/Gstm7/Atp1b3/Kif5b/Ptpn11/Pkd2/Atp7a/Kcna1/Dbi/Cacng4/Akap9/Bmp4/Atp1b2/Adipor2/Prkaa1/Abl1/Kcnj2/Tmsb4x/Rhoq/Fxyd1
GO:1901381	positive regulation of potassium ion transmembrane transport	32	0.576174	1.87503	0.00209648	0.0413207	Oprk1/Flna/Actn2/Kcnmb1/Nppa/Ano6/Wnk1/Atp1b3/Kcna1/Akap9/Atp1b2/Kcnj2
GO:0072006	nephron development	102	0.407458	1.66299	0.0021	0.0413207	Gpc3/Acta2/Fgf1/Nid1/Ednrb/Sulf1/Ahi1/Ptpro/Notch2/Pdgfra/Cfh/Dchs1/Ptch1/Gli3/Enpep/Pkd2/Bmp7/Mtss1/Aqp1/Fgf2/Bmp4/Pecam1/Sec61a1/Smo/Notch1/Ret/Plce1/Klf15/Kirrel3/Notch3/Jag1/Smad4/Nup160/Pkd1
GO:0070588	calcium ion transmembrane transport	205	0.329687	1.50439	0.00210837	0.0413334	Drd2/Rgs9/Drd1/Htr2c/Cacna2d2/Ryr3/Pln/Tgfb2/Trpc4/Ednrb/Gstm2/Trpc7/Plp1/Chd7/Nppa/Ano6/Cacng5/Anxa2/Oprm1/Slc8a3/Ddit3/Hap1/Gstm7/Prkd1/Slc25a25/Pkd2/Fgf2/Dbi/Cacng4/Bmp4/Trpm7/Cacna2d3/Pde4b/Abl1/Atg5/Sec61a1
GO:0051346	negative regulation of hydrolase activity	199	0.339421	1.53723	0.00214013	0.0418028	Adora2a/Ppp1r1b/Spock3/Gpc3/Pln/Tgfb2/Lxn/Timp1/Serping1/Timp3/Fzd10/C3/Lrrk2/Timp4/Cryab/Thbs1/Rgs2/Apoc1/Plxnb3/A2m/Wnk1/Anxa2/Rffl/Serpinh1/Cnn3/Gpx1/Klf4/Rdx/Rrp1b/Aqp1/Pak2/Rock1/Spint2/Picalm/Kdm5a/Pecam1/Serpinb6a/Abl1/Tnnt2/Sfrp2/Reck/Ddx3x/Sema4d/Ppp1r9b/Itih3/Usp47/Xiap
GO:0045665	negative regulation of neuron differentiation	63	0.468352	1.76103	0.00215239	0.0418894	Mag/Six3/Dlx2/Id4/Olig2/Dlx1/Meis1/Ctdsp1/Itgb1/Rap1gap/Gli3/Cav1/Bmp7/Sox2/Rtn4/Zfp536/Rest/Zhx2/Notch1/Rhoa/B2m/Notch3/Jag1/Dixdc1/Cntn2/Gpr37l1/Pax6/Spag9/Ascl1/Mib1
GO:0035264	multicellular organism growth	145	0.371556	1.59712	0.00220807	0.0423593	Drd2/Rarb/Cacna2d2/Dlk1/Clic4/Igf2/Six3/Klf2/Slc12a2/Chd7/Col3a1/Pmp22/Notch2/Cdk4/Csf1/Ptch1/Pls1/Smpd3/Zfp36l1/Slc25a25/Ptpn11/Alms1/Nipbl/Tcf7l2
GO:0048844	artery morphogenesis	50	0.510403	1.80934	0.00221733	0.0423593	Tgfb2/Chd7/Col3a1/Sox4/Mylk/Prrx1/Pkd2/Kat6a/Rtn4/Adamts9/Prox1/Bmp4/Notch1/Mdk/Notch3/Jag1/Eng/Stra6/Foxc1
GO:0048705	skeletal system morphogenesis	155	0.364109	1.58923	0.00222614	0.0423593	Rarb/Hhip/Sfrp1/Sox11/Dlx5/Tgfb2/Stc1/Sulf1/Bmp6/Col1a1/Dlx2/Col3a1/Tiparp/Thbs1/Foxn3/Ccn2/Mmp14/Fgfr2/Pdgfra/Zeb1/Serpinh1/Gli3/Smpd3/Prrx1/Bmp7/Nipbl/Bmp4/Col11a1/Tgfbr2/Megf8/Axin1/Sfrp2/Trip11/Hspg2/Zmpste24/Setd2/Bmi1/Ift140/Dync2i1/Pkd1/Alx3/Foxc1/Ryk/Lrp6/Phospho1/Chsy1/Chst11/Tgfbr1
GO:0045807	positive regulation of endocytosis	95	0.414376	1.66266	0.00222652	0.0423593	Drd2/Gpc3/Pard3/Tf/Dab2/Ahi1/C3/Lrrk2/Ptpn5/Itgb1/Ano6/Anxa2/Cav1/Picalm/Cd63/Caly
GO:0030324	lung development	170	0.353091	1.55903	0.00223043	0.0423593	Hhip/Gpc3/Mme/Fgf1/Sox11/Tgfb2/Mgp/Cp/Klf2/Foxp2/Fndc3b/Col3a1/Errfi1/Ccn2/Sparc/Mmp14/Fgfr2/Pdgfra/Ccdc39/Slc7a11/Aldh1a2/Hmgcs2/Gli3/Smpd3/Rbp4/Atp7a/Sox2/Ctsh/Prox1/Fgf2/Lta4h/Sp1/Bmp4/Tns3/Hnrnpa1/Tgfbr2
GO:0035150	regulation of tube size	116	0.398271	1.65676	0.0022358	0.0423593	Drd1/Adora2a/Htr2c/Acta2/Oxtr/Drd5/Klf2/Ednrb/Adra2c/Kcnmb1/Tacr1/Nppa/Kat2b/Htr1d/Rgs2/Arhgap42/Itgb1bp1/Cd38/Smpd3/Prkcq/Cav1/Gpx1/Gja1/Gucy1a1/Rock1/Scpep1/Kcna5/Abl1/Atg5/Sod2/Pde5a/Rhoa/Casr/Adra2a/Bbs2/Slc8a1/Atp1a2/Sod3/Foxc1/Sod1/Gclc/Itga1
GO:0035107	appendage morphogenesis	114	0.396532	1.64526	0.00224298	0.0423593	Rarb/Gpc3/Dlx6/Sox11/Dlx5/Tgfb2/Sp9/Sulf1/Chd7/Col3a1/Sox4/Fgfr2/Notch2/Ptch1/Aldh1a2/Gli3/Prrx1/Gna12/Atp7a/Gja1/Bmp7/Nipbl/Bmp4/Map3k20/Megf8/Mustn1/Sfrp2/Notch1/Reck/Fgfr1/Mbnl1/Smad4/Frem2/Asph/Ift140/Alx3/Lrp6/Rpgrip1l/Chst11/Traf3ip1
GO:0035108	limb morphogenesis	114	0.396532	1.64526	0.00224298	0.0423593	Rarb/Gpc3/Dlx6/Sox11/Dlx5/Tgfb2/Sp9/Sulf1/Chd7/Col3a1/Sox4/Fgfr2/Notch2/Ptch1/Aldh1a2/Gli3/Prrx1/Gna12/Atp7a/Gja1/Bmp7/Nipbl/Bmp4/Map3k20/Megf8/Mustn1/Sfrp2/Notch1/Reck/Fgfr1/Mbnl1/Smad4/Frem2/Asph/Ift140/Alx3/Lrp6/Rpgrip1l/Chst11/Traf3ip1
GO:0030036	actin cytoskeleton organization	499	0.27792	1.38573	0.00224777	0.0423593	Tac1/Arhgap6/Prkcd/Anln/Flna/Tf/Lpar1/Ermn/Gsn/Myo1d/Tgfb2/Abi3bp/Actn2/Spag6l/Rnd3/Csrp1/Gab1/Fzd10/Myo5b/Jam3/Kank1/Tacr1/Cald1/Elmo1/Myo6/Wipf1/Fat1/Eln/Ap1ar/Itgb1/Ccn2/Pmp22/Arhgap18/Lcp1/Notch2/Alox15/Pdgfra/Tpm2/Itgb1bp1/Ehd2/Enah/Pls1/Samd14/Epb41l4a/Tpm4/Prkcq/Cnn3/Fmnl2/Kank4/Epb41/Mtss1/Trim32/Rdx/Marcks/Aqp1/Alms1/Rhoc/Prox1/Tmod3/Svil/Pak2/Mical3/Rock1/Epb41l2/Rnd2/Trpm7/Arfip1/Arpc1…
GO:0099633	protein localization to postsynaptic specialization membrane	27	-0.594657	-1.83035	0.00229114	0.0427415	Magi2/Prkcz/Rapgef4/Dlg4/Git1/Iqsec2/Camk2a/Kalrn/Gpc6/Cacng2/Nptx1/Lgi1/Nptx2/Nptxr/Cnih3/Cacng3
GO:0099645	neurotransmitter receptor localization to postsynaptic specialization membrane	27	-0.594657	-1.83035	0.00229114	0.0427415	Magi2/Prkcz/Rapgef4/Dlg4/Git1/Iqsec2/Camk2a/Kalrn/Gpc6/Cacng2/Nptx1/Lgi1/Nptx2/Nptxr/Cnih3/Cacng3
GO:0090130	tissue migration	214	0.331462	1.50759	0.00229201	0.0427415	Tac1/Acta2/Anln/Dcn/Fgf1/Igf2/Tgfb2/Stc1/Enpp2/Prcp/Kank1/Tacr1/Map4k4/Fstl1/Jcad/Thbs1/Itgb1/Sparc/Itgb1bp1/Pik3c2a/Tgfbr3/Adam17/Prkd1/Ptpn11/Gpx1/Klf4/Gadd45a/Rtn4/Ctsh/Aqp1/Adamts9/Prox1/Fgf2/Plpp3/Rock1/Prkx/Sp1/Bmp4/Tgfbr2/Cd63/Stard13/Nr2f2/Pecam1/Kank2/Abl1/Pkn2/Tmsb4x/Notch1/Adipor1
GO:0051302	regulation of cell division	99	0.41069	1.66837	0.00235648	0.0437913	Drd2/Klhl13/Fgf1/Igf2/Tgfb2/Txnip/Kif13a/Fgfr2/Ptch1/Tgfa/Pkp4/Ccp110/Sirt2/Fgf2/Myo19/Cdc14b/Ahctf1/Sfrp2/Pkn2/Pdgfc/Cdc14a/Mdk/Igf1r/Rhoa/Sh3glb1/Setd2/Flcn/Lbh/Cdc42/Aurkc
GO:0016055	Wnt signaling pathway	298	0.304817	1.44238	0.00239104	0.0441594	Drd2/Kremen1/Gpc3/Sfrp1/Foxo1/Dlx5/Six3/Shisa6/Strn/Dab2/Ednrb/Fzd10/Sulf1/Col1a1/Lrrk2/Kank1/Sox4/Nppa/Ptpro/Fgfr2/Sox10/Lats2/Wnk1/Ddit3/Gli3/Tmem131l/Cav1/Fzd2/Klf4/Lgr5/Rbms3/Draxin/Ubr5/Bicc1/Sox2/Gprc5b/Fgf2/Tnks/Plpp3/Tcf7l2/Mesd/Tle4/Prkaa1/Hbp1/Abl1/Axin1/Sfrp2/Mbd2/Celsr1/Lrrfip2/Notch1/Fermt2/Ccdc88c/Reck/Mdk/Tcf7l1/Ddx3x/Otulin/Klf15/Usp47/Xiap
GO:0043584	nose development	10	0.79871	1.92686	0.00239279	0.0441594	Dlx5/Chd7/Sox2/Pou2f1/Stra6/Rpgrip1l/Smchd1/Ascl1/Gng8/Rdh10
GO:0043583	ear development	157	0.359606	1.56832	0.00242604	0.044248	Dlx6/Ntn1/Dlx5/Tgfb2/Spag6l/Pou3f4/Ahi1/Ddr1/Chd7/Itga8/Myo6/Sparc/Fgfr2/Pdgfra/Dchs1/Zeb1/Pls1/Gli3/Lrig1/Prrx1/Fzd2/Ptpn11/Lgr5/Kcnk2/Adgrv1/Anp32b/Mycl/Sox2/Cdkn1b/Alms1/Prox1/Nipbl/Bmp4/Col11a1/Rest/Atg5/Celsr1/Gjb6/Notch1/Trip11/Fgfr1/Cxcl14/Lrp10/Jag1/Ripor2/Frem2
GO:0071772	response to BMP	107	0.408733	1.68939	0.00242964	0.044248	Gpc3/Sfrp1/Sox11/Dlx5/Tgfb2/Sulf1/Bmp6/Rgma/Fstl1/Dlx1/Elapor2/Notch2/Tgfbr3/Smpd3/Cav1/Tmem100/Bmp7/Ccn1/Hipk2/Bmp4/Spint2/Fn1/Tcf7l2/Smad5/Neo1/Spart/Megf8/Abl1/Sfrp2/Smurf2/Notch1
GO:0071773	cellular response to BMP stimulus	107	0.408733	1.68939	0.00242964	0.044248	Gpc3/Sfrp1/Sox11/Dlx5/Tgfb2/Sulf1/Bmp6/Rgma/Fstl1/Dlx1/Elapor2/Notch2/Tgfbr3/Smpd3/Cav1/Tmem100/Bmp7/Ccn1/Hipk2/Bmp4/Spint2/Fn1/Tcf7l2/Smad5/Neo1/Spart/Megf8/Abl1/Sfrp2/Smurf2/Notch1
GO:0006959	humoral immune response	59	0.470757	1.74249	0.00243067	0.044248	Nts/Tac1/Tf/Serping1/C3/C1r/Hist1h2bq/Notch2/A2m/Cfh/H2bc12/Rpl30/Fam3a/Notch1/C1qa/B2m/Cxcl14/Bmi1/Cd59/Npy/Aire
GO:0099177	regulation of trans-synaptic signaling	459	-0.29472	-1.37673	0.00250002	0.0451988	Egr2/Dlgap4/Rapgef4/Ppfia3/Zdhhc3/Calm2/Syngap1/Bscl2/Ptk2/Kcnh1/Cyp46a1/Mecp2/Grik1/Rapgef2/Crtc1/Dgke/Dlg4/Mir128-1/Rab3a/Map1b/Zmynd8/Ywhag/Anapc2/Baiap2/Rims1/Elavl4/Adora1/Slc1a1/Usp46/Grin1/Atp2b2/Btbd9/Slc4a10/Grik4/Grin2b/Syngr1/Zdhhc2/Homer1/Camk2n2/LRRTM1/Abr/Cabp1/Lzts1/Pclo/Prkar1b/Git1/Prkcb/Iqsec2/Shisa8/Dvl1/Camk2a/Stxbp1/Grk2/Adgrb1/Slc8a2/Apba1/Pak1/Tbc1d24/Clstn2/Adrb1/Slc4a8/Mp…
GO:0035296	regulation of tube diameter	115	0.399242	1.6546	0.00250823	0.0451988	Drd1/Adora2a/Htr2c/Acta2/Oxtr/Drd5/Klf2/Ednrb/Adra2c/Kcnmb1/Tacr1/Nppa/Kat2b/Htr1d/Rgs2/Arhgap42/Itgb1bp1/Cd38/Smpd3/Prkcq/Cav1/Gpx1/Gja1/Gucy1a1/Rock1/Scpep1/Kcna5/Abl1/Atg5/Sod2/Pde5a/Rhoa/Casr/Adra2a/Bbs2/Slc8a1/Atp1a2/Sod3/Foxc1/Sod1/Gclc/Itga1
GO:0097746	blood vessel diameter maintenance	115	0.399242	1.6546	0.00250823	0.0451988	Drd1/Adora2a/Htr2c/Acta2/Oxtr/Drd5/Klf2/Ednrb/Adra2c/Kcnmb1/Tacr1/Nppa/Kat2b/Htr1d/Rgs2/Arhgap42/Itgb1bp1/Cd38/Smpd3/Prkcq/Cav1/Gpx1/Gja1/Gucy1a1/Rock1/Scpep1/Kcna5/Abl1/Atg5/Sod2/Pde5a/Rhoa/Casr/Adra2a/Bbs2/Slc8a1/Atp1a2/Sod3/Foxc1/Sod1/Gclc/Itga1
GO:0010807	regulation of synaptic vesicle priming	10	-0.75908	-1.77899	0.00254537	0.0457141	Rab3a/Rims1/Stxbp1/Napb/Unc13a/Unc13b/Napa/Stx1a
GO:0006954	inflammatory response	335	0.29663	1.42688	0.00255478	0.0457297	Adora2a/Tac1/Lpl/Nfkbia/Tf/Apod/Tspan2/Abi3bp/Lxn/Timp1/Ednrb/Nt5e/Ezh2/Bmp6/Prcp/Zfp36/C3/Lrrk2/Plp1/Jam3/Tacr1/Nppa/Thbs1/Itgb1/Pmp22/Ano6/Notch2/Hmgb2/Alox15/Vcam1/A2m/Oprm1/Cfh/Csf1/Kdm6b/Adam17/Alox5ap/Prkcq/Prkd1/Uaca/Gpx1/Gja1/Ass1/Ctsc/Mfhas1/Gprc5b/Rtn4/Tril/Fn1/Kcnj10/Enpp3/Cd74/Plgrkt
GO:1901653	cellular response to peptide	308	0.303955	1.44514	0.00259664	0.0462153	Drd1/Lpl/Nr4a2/Prkcd/Vim/Sgk1/Foxo1/Plat/Igf2/Actn2/Klf2/Car2/Erbb3/Errfi1/Kank1/Kat2b/Ano1/Vcam1/Cdk4/Inpp5f/Hmgcs2/Smpd3/Prkcq/Zfp36l1/Wdr6/Cav1/Fzd2/Ptpn11/Klf4/Gja1/Ass1/Enpp1/Cav2/Mtus1/Marcks/Rock1/Sp1/Fn1/Nucb2/Cacna2d3/Sesn3/Prkaa1/Grm5/Cyfip1/Slc30a10/Fis1/Adipor1/Rhoq/Pip4k2a/Rpl23/Igf1r/Gria1/Eif4ebp2/Soga1/Klf15/Casr/Srsf5/Ppp1r9b/Osbpl8/Appl2/Ccnd2/Gnai2/Nfe2l2/Rb1/Hnrnph1/Rab8b/Srd5…
GO:0007625	grooming behavior	14	0.725687	1.91529	0.00259918	0.0462153	Drd2/Drd1
GO:0048592	eye morphogenesis	110	0.405477	1.68351	0.00268421	0.0475181	Rarb/Sox11/Tenm3/Six3/Ahi1/Meis1/Fat1/Notch2/Cfh/Zeb1/Gli3/Cdon/Rbp4/Bmp7/Hmgn1/Sox2/Hipk2/Aqp1/Alms1/Prox1/Fgf2/Nipbl/Sp1/Bmp4/Ephb1/Zhx2/Rpgr/Tspan12/Pou2f1
GO:0007599	hemostasis	101	0.39195	1.59626	0.00269021	0.0475181	Prkcd/Flna/Myl9/Cd9/Csrp1/Serping1/C3/Adra2c/Enpp4/Pros1/Thbs1/Ano6/Pdgfra/Anxa2/Cfh/Papss2/Slc7a11/Prkcq/Cav1/Vcl/Stxbp3/Abat/Fn1/Nbeal2/C1qtnf1/Vkorc1/Fcer1g/Ap3b1/Entpd1/Adra2a/Nfe2l2/St3gal4/Prdx2/Gna13/C1galt1c1/Jak2/Tln1/Prkg1/Myh9/Serpine2/Fbln1/Ceacam1
GO:0007015	actin filament organization	317	0.307352	1.47068	0.00273059	0.0480728	Tac1/Arhgap6/Prkcd/Flna/Tf/Lpar1/Ermn/Gsn/Myo1d/Actn2/Spag6l/Rnd3/Myo5b/Kank1/Tacr1/Cald1/Elmo1/Myo6/Wipf1/Fat1/Eln/Ap1ar/Ccn2/Arhgap18/Lcp1/Alox15/Tpm2/Itgb1bp1/Enah/Pls1/Samd14/Tpm4/Prkcq/Kank4/Mtss1/Rdx/Marcks/Alms1/Rhoc/Prox1/Tmod3/Svil/Pak2/Mical3/Rnd2/Arfip1/Arpc1b/Myo19/Cgnl1/Rhog/Pecam1/Abl1/Ppfia1/Tnnt2/Cyfip1/Cdc42ep1/Tmsb4x/Arap1/Fermt2/Ctnna3/Ccdc88a/Lima1/Nebl/Rhoa
GO:0019226	transmission of nerve impulse	60	0.47521	1.75846	0.0027499	0.048254	Cartpt/Drd1/Oprk1/Gpr88/Mag/Drd5/Jam3/Pmp22/Cacng5/Grik2
GO:0099170	postsynaptic modulation of chemical synaptic transmission	16	0.704704	1.90254	0.00281049	0.0490778	Drd2/Drd1/Dcc/Grm5/Cyfip1
GO:0048708	astrocyte differentiation	66	0.465666	1.7786	0.00281519	0.0490778	Drd1/Adora2a/Vim/Mag/Tspan2/Plp1/Id4/Ptpn11/Plpp3/Il6st/Abl1/Smo/Notch1/C1qa/Cntn2/Kdm4a/Atf5/S100b/Gpr37l1/Pax6/Agt
GO:0002791	regulation of peptide secretion	162	0.347677	1.53373	0.00283285	0.0491094	Drd2/Cartpt/Htr2c/Nnat/Adcy5/Sfrp1/Syt9/Doc2b/Chd7/Sox4/Map4k4/Ano1/Baiap3/Myt1/Cd38/Rbp4/Kif5b/Ptpn11/Gja1/Pde8b/Abat/Tcf7l2/Cd74/Nucb2/Slc16a1/Rest
GO:0014821	phasic smooth muscle contraction	12	0.763299	1.92313	0.00283987	0.0491094	Drd2/Drd1/Ednrb/Htr1d
GO:0042069	regulation of catecholamine metabolic process	21	0.660298	1.90129	0.00284657	0.0491094	Drd1/Htr2c/Nr4a2/Pde1b/Gpr37
GO:0070372	regulation of ERK1 and ERK2 cascade	204	0.323475	1.4736	0.0028537	0.0491094	Drd2/Htr2c/Acta2/Fgf1/Dab2/Timp3/Cnksr3/Pde8a/C3/Necab2/Errfi1/Ccn2/Dcc/Fgfr2/Notch2/Alox15/Pdgfra/Oprm1/Itgb1bp1/Adam17/Cav1/Ptpn11/Klf4/Dusp1/Mfhas1/Ccn1/Fgf2/Bmp4/Fn1/Cd74/Cd4/Ackr3/Dusp15/Ephb1/Sema6a/Abl1/Csf1r/Slc30a10/Pdgfc/Notch1/Fermt2/Gpnmb/Dusp4/Tnfrsf11a/Jun/Casr/Flcn/Smad4/Gnai2/Tiam1
GO:0050679	positive regulation of epithelial cell proliferation	127	0.383274	1.61019	0.00287271	0.049278	Sfrp1/Dlx6/Fgf1/Sox11/Igf2/Dlx5/Foxp2/Bmp6/Scg2/Tacr1/Jcad/Fgfr2/Notch2/Hmgb2/Plxnb3/Tgfa/Adam17/Prkd1/Cav1/Atp7a/Cav2/Rtn4/Prox1/Fgf2/Sp1/Bmp4/Tcf7l2/Smo/Notch1/Hspg2/Mdk/Jun/Fgfr1/Ccnd2/Bmi1
GO:0050804	modulation of chemical synaptic transmission	458	-0.29492	-1.37678	0.00288621	0.0493514	Egr2/Dlgap4/Rapgef4/Ppfia3/Zdhhc3/Calm2/Syngap1/Bscl2/Ptk2/Kcnh1/Cyp46a1/Mecp2/Grik1/Rapgef2/Crtc1/Dgke/Dlg4/Mir128-1/Rab3a/Map1b/Zmynd8/Ywhag/Anapc2/Baiap2/Rims1/Elavl4/Adora1/Slc1a1/Usp46/Grin1/Atp2b2/Btbd9/Slc4a10/Grik4/Grin2b/Syngr1/Zdhhc2/Homer1/Camk2n2/LRRTM1/Abr/Cabp1/Lzts1/Pclo/Prkar1b/Git1/Prkcb/Iqsec2/Shisa8/Dvl1/Camk2a/Stxbp1/Grk2/Adgrb1/Slc8a2/Apba1/Pak1/Tbc1d24/Clstn2/Adrb1/Slc4a8/Mp…
GO:0090087	regulation of peptide transport	163	0.355716	1.56695	0.00290248	0.0494715	Drd2/Cartpt/Htr2c/Nnat/Adcy5/Sfrp1/Syt9/Car2/Doc2b/Chd7/Sox4/Map4k4/Ano1/Baiap3/Myt1/Cd38/Rbp4/Kif5b/Ptpn11/Gja1/Pde8b/Abat/Tcf7l2/Cd74/Nucb2/Slc16a1/Rest
GO:0007622	rhythmic behavior	38	0.54541	1.82908	0.00294561	0.0498562	Drd2/Drd1/Adora2a/Six3/Ptgds
GO:0090092	regulation of transmembrane receptor protein serine/threonine kinase signaling pathway	161	0.346771	1.5288	0.00294721	0.0498562	Igsf1/Gpc3/Sfrp1/Sox11/Tgfb2/Zic2/Dab2/Sulf1/Bmp6/Rgma/Itga8/Fstl1/Dlx1/Thbs1/Elapor2/Notch2/Lats2/Cidea/Zeb1/Tgfbr3/Adam17/Snx25/Cav1/Bmp7/Cav2/Ccn1/Hipk2/Bmp4/Tcf7l2/Neo1/Rbpms/Spart/Abl1/Axin1/Sfrp2/Smurf2/Pals1/Notch1
GO:0048678	response to axon injury	96	0.413178	1.66399	0.00295299	0.0498562	Nts/Drd2/Kremen1/Flna/Mag/Apod/Jam3/Rgma/Inpp5f/Vcan/Cers2/Adam17/Klf4/Kcnk2/Nefh/Rtn4/Fgf2/Neo1

## Sheet: S3 KEGG 40 min
Table S3: GSEA results for KEGG pathways in the PFC immediately after FS
Columns	ID: Gene set ID; Description: Gene Set Description; setSize: Gene Set size; enrichmentScore: enrichment Score; NES: enrichment score normalized to mean enrichment of random samples of the same size; pvalue: enrichment p-value; p.adjust: Benjamini & Hochberg adjusted p-value; core_enrichment: leading edge genes
ID	Description	setSize	enrichmentScore	NES	pvalue	p.adjust	core_enrichment
Alcoholism	Alcoholism	94	0.547525	2.19108	2.83216e-07	7.61851e-05	Drd2/Drd1/Adora2a/Gng7/Ppp1r1b/Adcy5/Pdyn/Hist2h3c2/Gnb4/Hist1h2bq/hist1h2ail2/Hist1h4b/H2bc12/Hist1h2ah/Gng5/LOC685069/Creb3l1/Gnai3/Ppp1cc/Creb3l2/Hat1
cAMP signaling pathway	cAMP signaling pathway	153	0.411953	1.78081	6.19926e-05	0.00833801	Drd2/Drd1/Adora2a/Ppp1r1b/Adcy5/Hhip/Pde10a/Nfkbia/Pln/Myl9/Oxtr/Drd5/Vav3/Htr4/Nppa/Htr1d/Pde3a/Ptch1/Gli3/Fos/Atp1b3/Adcyap1r1/Rock1/Creb3l1/Atp1b2/Gnai3/Ppp1cc/Creb3l2/Pde4b
Cocaine addiction	Cocaine addiction	36	0.62528	2.12568	0.000200341	0.0179639	Drd2/Rgs9/Drd1/Ppp1r1b/Adcy5/Pdyn
Dopaminergic synapse	Dopaminergic synapse	100	0.439313	1.77408	0.000429139	0.0241288	Drd2/Drd1/Gng7/Gnal/Ppp1r1b/Adcy5/Drd5/Gnb4/Fos/Kif5b/Gng5/Creb3l1/Gnai3/Ppp1cc/Creb3l2/Caly
Rap1 signaling pathway	Rap1 signaling pathway	148	0.394315	1.69866	0.00044849	0.0241288	Drd2/Adora2a/Adcy5/Rasgrp2/Pard3/Fgf1/Lpar1/Rapgef6/Vav3/Thbs1/Itgb1/Fgfr2/Pdgfra/Rap1gap/Rasgrp3/Csf1/Enah/Prkd1/Fgf2/Gnai3/Kitlg/Csf1r/Pdgfc/Prkd3/Igf1r/Plce1/Rhoa
Vascular smooth muscle contraction	Vascular smooth muscle contraction	82	0.459339	1.80483	0.000661976	0.0296786	Adora2a/Adcy5/Myh11/Prkcd/Prkch/Acta2/Myl9/Ppp1r14a/Kcnmb1/Nppa/Cald1/Mylk/Prkcq/Gna12/Gucy1a1/Rock1/Ppp1cc
Proteoglycans in cancer	Proteoglycans in cancer	144	0.377478	1.61545	0.00109106	0.0419278	Gpc3/Flna/Dcn/Igf2/Col1a2/Tgfb2/Gab1/Vav3/Timp3/Fzd10/Msn/Erbb3/Col1a1/Thbs1/Itgb1/Sdc2/Ptch1/Cav1/Fzd2/Ptpn11/Cav2/Rdx/Fgf2/Rock1/Fn1/Cd63/Ppp1cc/Smo/Hspg2/Iqgap1/Igf1r/Plce1/Rhoa
Calcium signaling pathway	Calcium signaling pathway	149	0.358437	1.54773	0.00180216	0.0605976	Drd1/Adora2a/Htr2c/Gnal/Ryr3/Fgf1/Pln/Pde1b/Oxtr/Drd5/Ednrb/Htr4/Erbb3/Tacr1/Mylk/Fgfr2/Pdgfra/Slc8a3/Cd38
Various types of N-glycan biosynthesis	Various types of N-glycan biosynthesis	14	-0.674415	-1.74261	0.00321641	0.0961348	Man1b1/Chst8/B4galt3/B4galt2/Man1c1/B4galnt4

## Sheet: S4 limma 2h
Table S4: Summary of limma statistics from differential expression analysis between stress and non stress rats 2 hours after stress
Columns	PROBEID: Agilet Probe ID; SYMBOL: official Gene Symbol; GENENAME: official Gene Name; logFC: log fold change Stress vs Controls; AveExpr: average Expression; t: Limma T statistics; P.Value: test p-value; adj.P.Val: Benjamini & Hochberg adjusted p-value
PROBEID	SYMBOL	GENENAME	logFC	AveExpr	t	P.Value	adj.P.Val
10899187	Gpd1	glycerol-3-phosphate dehydrogenase 1	0.886097	8.5336	12.0841	9.15162e-09	0.00015199
10939516	Tsc22d3	TSC22 domain family, member 3	0.619734	7.2133	9.71602	1.40551e-07	0.00116714
10717331	Sgk1	serum/glucocorticoid regulated kinase 1	0.707392	9.38089	7.87578	1.70917e-06	0.00946196
10929450	Slc19a3	solute carrier family 19 member 3	0.705272	6.57957	7.57135	2.68347e-06	0.0111418
10818262	Slc16a4	solute carrier family 16, member 4	-0.293531	5.03034	-6.77832	9.18964e-06	0.0305243
10860900	Pdk4	pyruvate dehydrogenase kinase 4	0.809756	5.55174	6.45162	1.56362e-05	0.043281
10719323	Hif3a	hypoxia inducible factor 3 subunit alpha	0.240181	4.99099	6.33818	1.88698e-05	0.0447701
10898259	Prr5	proline rich 5	0.236475	7.36826	6.14984	2.58828e-05	0.0537327
10834022	Arrdc3	arrestin domain containing 3	0.381368	7.93106	5.76222	5.03721e-05	0.0776058
10917116	Zbtb16	zinc finger and BTB domain containing 16	0.460691	8.57941	5.76133	5.04505e-05	0.0776058
10940650	Kdr	kinase insert domain receptor	-0.39927	5.75089	-5.70263	5.59045e-05	0.0776058
10763268	Tnfrsf11a	TNF receptor superfamily member 11A	0.456982	5.8504	5.70091	5.60736e-05	0.0776058
10936959	Slc38a5	solute carrier family 38, member 5	-0.274164	4.51268	-5.3724	0.000100484	0.128372
10869010	Zfp189	zinc finger protein 189	0.485891	7.85328	5.29741	0.000115033	0.136461
10724516	Rrp8	ribosomal RNA processing 8	0.19542	6.69165	5.19336	0.000138945	0.141758
10823783	Fnip2	folliculin interacting protein 2	0.183516	6.5967	5.1747	0.000143753	0.141758
10871521	Slc2a1	solute carrier family 2 member 1	0.249298	9.99678	5.15774	0.000148274	0.141758
10744766	Aspa	aspartoacylase	0.449962	7.48503	5.13829	0.00015364	0.141758
10885110	Dact1	dishevelled-binding antagonist of beta-catenin 1	-0.249369	5.21212	-5.03927	0.000184266	0.161067
10910678	Itga11	integrin subunit alpha 11	0.186708	5.03496	4.94595	0.000218949	0.181815
10820634	Ankdd1b	ankyrin repeat and death domain containing 1B	0.306237	5.09445	4.89074	0.000242597	0.18786
10739357	Sox9	SRY-box transcription factor 9	-0.290126	8.36293	-4.87018	0.000252064	0.18786
10845767	Cobll1	cordon-bleu WH2 repeat protein-like 1	-0.23261	6.34886	-4.85322	0.000260163	0.18786
10831940	Fkbp5	FKBP prolyl isomerase 5	0.28702	7.40666	4.81286	0.000280533	0.194129
10841367	Myh7b	myosin heavy chain 7B	-0.189833	5.10258	-4.77	0.000303987	0.198522
10721188	Plekhf1	pleckstrin homology and FYVE domain containing 1	0.324592	4.61573	4.73464	0.000324859	0.198522
10880074	Tinagl1	tubulointerstitial nephritis antigen-like 1	0.546545	6.89401	4.72145	0.000333018	0.198522
10865738	Kcna6	potassium voltage-gated channel subfamily A member 6	0.228923	7.68894	4.70053	0.000346395	0.198522
10816418	Gpatch4	G patch domain containing 4	0.240714	6.49162	4.70014	0.000346648	0.198522
10726652	Bet1l	Bet1 golgi vesicular membrane trafficking protein-like	0.207593	4.88847	4.65365	0.000378431	0.207787
10745340	Evi2b	ecotropic viral integration site 2B	-0.215556	6.19325	-4.64065	0.000387849	0.207787
10928668	Ikzf2	IKAROS family zinc finger 2	0.243637	5.99918	4.58893	0.000427764	0.214783
10874193	Errfi1	ERBB receptor feedback inhibitor 1	0.212845	8.86514	4.58756	0.000428875	0.214783
10888150	Zfp36l2	zinc finger protein 36, C3H type-like 2	-0.240286	6.91857	-4.56884	0.00044439	0.214783
10821050	Pik3r1	phosphoinositide-3-kinase regulatory subunit 1	0.16959	9.35573	4.55381	0.000457267	0.214783
10724745	Dennd2b	DENN domain containing 2B	-0.223239	7.03267	-4.52458	0.00048342	0.214783
10754785	Tfrc	transferrin receptor	-0.252362	8.53717	-4.51734	0.000490128	0.214783
10921910	Enpp4	ectonucleotide pyrophosphatase/phosphodiesterase 4	0.232889	8.26276	4.50196	0.000504708	0.214783
10819269	Slc39a8	solute carrier family 39 member 8	-0.183852	4.83627	-4.49189	0.000514496	0.214783
10832920	Ddit4	DNA-damage-inducible transcript 4	0.404563	7.52806	4.48904	0.0005173	0.214783
10865081	Adipor2	adiponectin receptor 2	0.235852	7.71783	4.4553	0.000551737	0.223494
10802040	Pdgfrb	platelet derived growth factor receptor beta	-0.196501	7.26612	-4.42305	0.000586858	0.232061
10730659	Sh3pxd2a	SH3 and PX domains 2A	0.234328	6.47165	4.39234	0.000622437	0.24004
10800189	Cables1	Cdk5 and Abl enzyme substrate 1	0.287252	6.76125	4.38116	0.000635945	0.24004
10808348	Wfdc1	WAP four-disulfide core domain 1	0.256994	6.77596	4.32563	0.000707585	0.242966
10897121	Mapk15	mitogen-activated protein kinase 15	-0.204706	4.79565	-4.32104	0.00071387	0.242966
10831492	Notch4	notch receptor 4	0.204258	5.87858	4.30687	0.000733623	0.242966
10751709	Acap2	ArfGAP with coiled-coil, ankyrin repeat and PH domains 2	0.162767	8.5485	4.29801	0.000746258	0.242966
10782891	Bmp4	bone morphogenetic protein 4	0.965551	6.61171	4.29724	0.000747377	0.242966
10890024	Nfkbia	NFKB inhibitor alpha	0.301878	6.82884	4.29629	0.000748738	0.242966
10901166	Angptl4	angiopoietin-like 4	0.309289	5.17809	4.29049	0.00075716	0.242966
10887306	Tnfaip2	TNF alpha induced protein 2	-0.245051	5.21142	-4.28805	0.000760733	0.242966
10747813	Slc4a1	solute carrier family 4 member 1 (Diego blood group)	-0.309009	5.2345	-4.25038	0.00081813	0.256368
10779081	Usp54	ubiquitin specific peptidase 54	0.336211	7.89843	4.20961	0.000885268	0.268373
10884056	Alkal2	ALK and LTK ligand 2	0.173653	4.91142	4.20758	0.000888759	0.268373
10837576	Olr619	olfactory receptor 619	0.218741	4.23461	4.19701	0.000907143	0.269033
10869808	Acer2	alkaline ceramidase 2	0.457873	6.98866	4.15004	0.000993691	0.28953
10834138	Nrarp	Notch-regulated ankyrin repeat protein	-0.254885	7.35838	-4.12766	0.00103784	0.294097
10880240	Gmeb1	glucocorticoid modulatory element binding protein 1	-0.199385	7.87366	-4.12423	0.00104478	0.294097
10908008	Mtmr2	myotubularin related protein 2	0.196036	8.98697	4.10987	0.00107438	0.297389
10745303	Ksr1	kinase suppressor of ras 1	0.166132	7.40074	4.07735	0.00114461	0.311635
10718539	Prpf31	pre-mRNA processing factor 31	0.124268	6.72048	4.05833	0.00118783	0.312025
10733564	P4ha2	prolyl 4-hydroxylase subunit alpha 2	0.163203	6.71683	4.05603	0.00119316	0.312025
10892035	Clmn	calmin	0.248721	7.76722	4.04319	0.00122342	0.312025
10796835	Mrpl36	mitochondrial ribosomal protein L36	-0.174526	6.9971	-4.03797	0.00123595	0.312025
10810295	Dnajb1	DnaJ heat shock protein family (Hsp40) member B1	0.234321	7.87626	4.02603	0.00126511	0.312025
10904169	Ndrg1	N-myc downstream regulated 1	0.335621	9.18602	4.02491	0.00126786	0.312025
10804712	Mir143	microRNA 143	0.202735	5.32426	4.01917	0.00128216	0.312025
10920981	Cx3cr1	C-X3-C motif chemokine receptor 1	-0.191819	9.28049	-4.01354	0.00129635	0.312025
10711401	Bag3	BAG cochaperone 3	0.134106	6.05481	3.99462	0.00134517	0.31915
10914537	Exosc7	exosome component 7	0.195477	5.29698	3.98034	0.00138325	0.322528
10707597	Atp10a	ATPase phospholipid transporting 10A (putative)	0.242155	6.16326	3.96918	0.00141378	0.322528
10811732	Sult5a1	sulfotransferase family 5A, member 1	0.214348	5.24473	3.96391	0.00142845	0.322528
10907784	Atp23	ATP23 metallopeptidase and ATP synthase assembly factor homolog	-0.204656	5.25504	-3.95879	0.00144284	0.322528
10751890	Tmem207	transmembrane protein 207	0.141971	4.13387	3.94996	0.00146801	0.322528
10879278	Tie1	tyrosine kinase with immunoglobulin-like and EGF-like domains 1	-0.175059	6.12274	-3.94477	0.001483	0.322528
10820953	Ocln	occludin	-0.304677	6.35269	-3.94054	0.00149534	0.322528
10889399	Rsad2	radical S-adenosyl methionine domain containing 2	-0.432696	4.96779	-3.9302	0.00152594	0.323397
10709875	Adm	adrenomedullin	0.176455	4.92568	3.92504	0.00154144	0.323397
10798764	B3galnt2	beta-1,3-N-acetylgalactosaminyltransferase 2	0.170692	6.76454	3.91361	0.00157636	0.323397
10905560	Mrtfa	myocardin related transcription factor A	0.169638	6.87743	3.91332	0.00157726	0.323397
10846331	Prkra	protein activator of interferon induced protein kinase EIF2AK2	-0.251199	6.76759	-3.89463	0.00163618	0.328193
10814847	Sox2	SRY-box transcription factor 2	-0.212711	7.94395	-3.89338	0.00164018	0.328193
10849267	Shf	Src homology 2 domain containing F	0.240398	5.71996	3.85821	0.00175745	0.347474
10930779	Slc25a23	solute carrier family 25 member 23	-0.162242	9.81994	-3.84229	0.00181331	0.354299
10909156	Olr1227	olfactory receptor 1227	0.207976	4.2858	3.82724	0.00186777	0.360697
10778361	Tbrg4	transforming growth factor beta regulator 4	-0.143783	8.19849	-3.8094	0.00193447	0.361587
10931346	Clpp	caseinolytic mitochondrial matrix peptidase proteolytic subunit	-0.350523	8.06443	-3.803	0.00195899	0.361587
10840255	Slx4ip	SLX4 interacting protein	-0.248536	5.15236	-3.80197	0.00196299	0.361587
10797138	Tgfbi	transforming growth factor, beta induced	-0.236115	4.98522	-3.78975	0.00201079	0.361587
10774171	Upp1	uridine phosphorylase 1	0.223991	6.42967	3.78156	0.00204347	0.361587
10851813	Zmynd8	zinc finger, MYND-type containing 8	0.169073	4.72667	3.77712	0.0020614	0.361587
10797469	Hrh2	histamine receptor H 2	0.134889	6.78885	3.76463	0.00211277	0.361587
10912908	Cish	cytokine inducible SH2-containing protein	0.147261	5.30515	3.75946	0.00213441	0.361587
10832934	Chst3	carbohydrate sulfotransferase 3	0.178073	4.73073	3.7563	0.00214775	0.361587
10816153	Tmem154	transmembrane protein 154	-0.144324	4.44705	-3.75318	0.00216099	0.361587
10737225	Mtmr4	myotubularin related protein 4	0.173612	8.04688	3.74822	0.00218222	0.361587
10916825	Phldb1	pleckstrin homology-like domain, family B, member 1	0.164418	6.37876	3.74538	0.00219447	0.361587
10867761	Mmp16	matrix metallopeptidase 16	0.177276	8.49366	3.74432	0.00219904	0.361587
10722982	Pex11a	peroxisomal biogenesis factor 11 alpha	0.316941	6.67079	3.7367	0.00223236	0.361587
10882511	Morn2	MORN repeat containing 2	-0.25089	4.76792	-3.73541	0.00223805	0.361587
10764367	Mir181b1	microRNA 181b-1	0.228776	6.21764	3.7344	0.00224249	0.361587
10916110	Chek1	checkpoint kinase 1	0.183529	4.59138	3.73014	0.00226142	0.361587
10752576	Pkp2	plakophilin 2	0.28481	6.39164	3.72745	0.00227344	0.361587
10848370	Meis2	Meis homeobox 2	-0.215492	9.73746	-3.72465	0.00228605	0.361587
10859511	Slco1c1	solute carrier organic anion transporter family, member 1c1	-0.208437	8.59977	-3.69952	0.00240226	0.372567
10736585	Adap2	ArfGAP with dual PH domains 2	0.203328	5.70086	3.69829	0.0024081	0.372567
10824926	Pip5k1a	phosphatidylinositol-4-phosphate 5-kinase, type 1, alpha	0.126517	9.04803	3.69521	0.00242276	0.372567
10754939	Fam43a	family with sequence similarity 43, member A	0.212288	6.884	3.67753	0.00250884	0.372755
10737047	Ca4	carbonic anhydrase 4	-0.303681	8.05559	-3.67736	0.00250971	0.372755
10756853	Radil	Rap associating with DIL domain	-0.110847	6.19111	-3.67712	0.00251088	0.372755
10897604	Micall1	MICAL-like 1	0.193827	5.75011	3.67654	0.00251376	0.372755
10809824	Gpt2	glutamic--pyruvic transaminase 2	0.185062	6.92302	3.66895	0.00255174	0.375038
10925460	Olr1350	olfactory receptor 1350	0.116653	5.11939	3.6404	0.00269984	0.382695
10718863	Rpl28	ribosomal protein L28	-0.19699	8.12429	-3.63958	0.00270417	0.382695
10726676	Ifitm5	interferon induced transmembrane protein 5	0.143641	5.09183	3.63771	0.00271423	0.382695
10939505	Nup62cl	nucleoporin 62 C-terminal like	-0.161501	4.25348	-3.63711	0.00271743	0.382695
10924672	Acsl3	acyl-CoA synthetase long-chain family member 3	0.144853	9.72149	3.63505	0.00272851	0.382695
10730190	Pik3ap1	phosphoinositide-3-kinase adaptor protein 1	-0.141645	4.6503	-3.62685	0.0027731	0.382695
10766072	Kif26b	kinesin family member 26B	0.133178	5.59377	3.62661	0.00277442	0.382695
10833675	Cdc40	cell division cycle 40	0.129183	6.86129	3.62153	0.00280244	0.382695
10774992	Fgfrl1	fibroblast growth factor receptor-like 1	-0.190484	6.70767	-3.61269	0.00285188	0.382695
10819903	Mir186	microRNA 186	-0.228717	6.31294	-3.6091	0.00287219	0.382695
10717233	Ccn2	cellular communication network factor 2	0.308078	6.46218	3.60677	0.00288545	0.382695
10888404	Rasgrp3	RAS guanyl releasing protein 3	-0.275281	7.47119	-3.60534	0.00289361	0.382695
10821698	Osmr	oncostatin M receptor	0.128687	4.70852	3.60364	0.00290339	0.382695
10780205	Mmp14	matrix metallopeptidase 14	-0.22091	5.04903	-3.58885	0.00298957	0.390951
10864756	Tmem40	transmembrane protein 40	0.143316	4.37543	3.57236	0.00308873	0.400762
10806806	Adgre5	adhesion G protein-coupled receptor E5	-0.160491	6.35299	-3.55759	0.00318042	0.408011
10781398	Nudt18	nudix hydrolase 18	0.158415	6.1457	3.55548	0.00319372	0.408011
10909892	Cryab	crystallin, alpha B	0.351228	8.69423	3.54337	0.00327122	0.410865
10894100	Plpp2	phospholipid phosphatase 2	0.154707	5.35733	3.54197	0.00328027	0.410865
10830561	Sesn1	sestrin 1	0.187835	7.8623	3.53801	0.00330611	0.410865
10897621	Polr2f	RNA polymerase II, I and III subunit F	-0.196111	9.37295	-3.53002	0.00335887	0.410865
10748021	Map3k14	mitogen-activated protein kinase kinase kinase 14	0.111333	6.04631	3.52997	0.0033592	0.410865
10772478	Nfxl1	nuclear transcription factor, X-box binding-like 1	-0.138438	7.14255	-3.52629	0.00338375	0.410865
10744425	Alox15	arachidonate 15-lipoxygenase	-0.764929	6.12877	-3.52547	0.00338924	0.410865
10940505	LOC364556	similar to Ab1-351	-0.12445	5.75206	-3.51703	0.00344642	0.414769
10756905	Iqce	IQ motif containing E	-0.160576	6.14652	-3.50499	0.00352959	0.421722
10784120	Gjb6	gap junction protein, beta 6	0.300239	8.44807	3.49228	0.00361964	0.422639
10862570	Hoxa9	homeobox A9	0.15162	4.39669	3.49097	0.00362902	0.422639
10843084	Oprl1	opioid related nociceptin receptor 1	0.157515	7.06505	3.49096	0.00362913	0.422639
10740669	LOC100361104	CG10869-like	0.174482	4.24216	3.48958	0.00363905	0.422639
10927992	Stk17b	serine/threonine kinase 17b	0.146813	6.53168	3.4765	0.0037346	0.427796
10830174	Pln	phospholamban	0.291643	4.51991	3.47645	0.00373498	0.427796
10895990	Rdh16	retinol dehydrogenase 16	0.268042	5.24129	3.46181	0.00384495	0.42955
10824600	Creb3l4	cAMP responsive element binding protein 3-like 4	0.135558	4.54096	3.45859	0.00386958	0.42955
10874594	Cfap74	cilia and flagella associated protein 74	-0.154633	5.54787	-3.45762	0.00387705	0.42955
10824530	Il6r	interleukin 6 receptor	0.275521	6.39043	3.45597	0.00388973	0.42955
10715644	Lzts2	leucine zipper tumor suppressor 2	0.117259	6.47292	3.45155	0.00392401	0.42955
10930984	Plin3	perilipin 3	-0.15947	4.71425	-3.45133	0.00392573	0.42955
10745288	Lgals5	galectin 5	-0.585158	5.57725	-3.44941	0.00394069	0.42955
10897547	Triobp	TRIO and F-actin binding protein	-0.134204	6.48081	-3.44678	0.00396128	0.42955
10855035	Clcn1	chloride voltage-gated channel 1	0.133912	4.90012	3.44402	0.00398306	0.42955
10720829	Hamp	hepcidin antimicrobial peptide	0.176667	5.01309	3.4339	0.00406375	0.434268
10842590	Rbm38	RNA binding motif protein 38	-0.277275	6.35938	-3.432	0.0040791	0.434268
10795599	Zfp438	zinc finger protein 438	-0.181916	5.88321	-3.42873	0.00410567	0.434312
10864185	Adamts9	ADAM metallopeptidase with thrombospondin type 1 motif, 9	0.183737	5.65577	3.41803	0.00419371	0.439094
10844772	Pdcl	phosducin-like	0.178807	8.14966	3.41682	0.00420376	0.439094
10921384	Nfya	nuclear transcription factor Y subunit alpha	0.156875	6.32208	3.40683	0.00428788	0.445082
10733730	Galnt10	polypeptide N-acetylgalactosaminyltransferase 10	-0.154988	5.40987	-3.39443	0.00439469	0.447159
10824089	Mab21l2	mab-21 like 2	0.152736	4.9381	3.39209	0.00441516	0.447159
10921951	Cd2ap	CD2-associated protein	-0.157937	8.60027	-3.38618	0.00446718	0.447159
10922279	Rab23	RAB23, member RAS oncogene family	0.183745	8.46133	3.38457	0.00448149	0.447159
10765587	Usf1	upstream transcription factor 1	0.210384	7.74403	3.38402	0.00448639	0.447159
10703256	LOC685793	similar to serine/threonine kinase	0.111369	4.18006	3.38336	0.00449221	0.447159
10886795	Begain	brain-enriched guanylate kinase-associated	-0.14031	7.83963	-3.38137	0.00451	0.447159
10861297	Rnf133	ring finger protein 133	0.139297	4.12807	3.37989	0.00452328	0.447159
10773115	Prom1	prominin 1	-0.267148	6.48787	-3.37642	0.00455456	0.447587
10861591	Cep41	centrosomal protein 41	-0.119216	6.85839	-3.36288	0.00467855	0.452808
10905738	Cyp2d1	cytochrome P450, family 2, subfamily d, polypeptide 1	0.26301	5.02407	3.36156	0.00469079	0.452808
10770443	Capn2	calpain 2	0.114792	8.45888	3.36109	0.00469516	0.452808
10857543	Setmar	SET domain and mariner transposase fusion gene	0.132702	5.98781	3.35878	0.00471675	0.452808
10751931	Bcl6	BCL6, transcription repressor	0.228795	7.26713	3.35397	0.00476197	0.454522
10907324	Galnt6	polypeptide N-acetylgalactosaminyltransferase 6	0.269308	5.71118	3.34885	0.00481064	0.455123
10785964	Dock9	dedicator of cytokinesis 9	0.118179	8.91811	3.34754	0.00482308	0.455123
10774737	Mtif2	mitochondrial translational initiation factor 2	-0.148894	6.17089	-3.34386	0.00485848	0.455874
10850486	Ralgapa2	Ral GTPase activating protein catalytic subunit alpha 2	0.134559	5.69837	3.33818	0.00491353	0.458449
10898229	Parvb	parvin, beta	-0.150823	8.46939	-3.33471	0.0049475	0.459039
10726114	Cox6a2	cytochrome c oxidase subunit 6A2	0.144689	6.00219	3.33036	0.00499038	0.460446
10741765	Hba-a3	hemoglobin alpha, adult chain 3	-0.911786	7.6905	-3.31793	0.005115	0.469336
10787391	Insl3	insulin-like 3	0.158737	5.00534	3.29885	0.00531236	0.483531
10794301	LOC689458	similar to vitamin A-deficient testicular protein 11-like	0.183976	4.37692	3.29737	0.00532793	0.483531
10806436	Neto2	neuropilin and tolloid like 2	-0.110291	9.86002	-3.28562	0.00545364	0.490418
10724447	Olr202	olfactory receptor 202	0.118119	4.55129	3.28477	0.00546286	0.490418
10897543	H1f0	H1.0 linker histone	-0.147249	9.02455	-3.27838	0.00553256	0.492192
10713328	Map4k2	mitogen activated protein kinase kinase kinase kinase 2	-0.13514	7.79883	-3.27753	0.0055419	0.492192
10729689	Prkg1	protein kinase cGMP-dependent 1	-0.149618	5.4644	-3.26944	0.00563156	0.496374
10704536	Prkd2	protein kinase D2	0.358162	6.42621	3.26791	0.00564876	0.496374
10744718	Spns2	sphingolipid transporter 2	0.100909	7.16698	3.26197	0.00571567	0.497978
10874534	Hes5	hes family bHLH transcription factor 5	-0.157913	7.77219	-3.26097	0.00572699	0.497978
10798046	Ppp1r3g	protein phosphatase 1, regulatory subunit 3G	0.156996	6.14703	3.25078	0.005844	0.505224
10721517	Med25	mediator complex subunit 25	-0.0994966	8.76313	-3.24707	0.00588723	0.505224
10848362	Dph6	diphthamine biosynthesis 6	-0.155352	7.90014	-3.24584	0.00590159	0.505224
10819787	Dnajb4	DnaJ heat shock protein family (Hsp40) member B4	0.116752	9.15079	3.24011	0.00596902	0.505857
10924687	Kcne4	potassium voltage-gated channel subfamily E regulatory subunit 4	0.190245	5.11708	3.24004	0.00596989	0.505857
10753784	Ift57	intraflagellar transport 57	-0.113676	7.52367	-3.21818	0.00623452	0.525598
10724792	Scube2	signal peptide, CUB domain and EGF like domain containing 2	-0.222641	6.48269	-3.20535	0.00639513	0.535868
10840975	Hck	HCK proto-oncogene, Src family tyrosine kinase	0.154348	5.10027	3.20327	0.00642166	0.535868
10747976	C1ql1	complement C1q like 1	-0.200233	7.16795	-3.2008	0.00645313	0.535868
10801719	Sncaip	synuclein, alpha interacting protein	-0.211209	5.40369	-3.19577	0.00651786	0.53855
10917285	LOC689959	hypothetical protein LOC689959	-0.173033	4.96869	-3.18325	0.00668174	0.545264
10734382	Pmp22	peripheral myelin protein 22	0.18307	8.96348	3.18279	0.00668791	0.545264
10818021	Ap4b1	adaptor related protein complex 4 subunit beta 1	0.108881	5.8666	3.18205	0.0066976	0.545264
10857157	Txnrd3	thioredoxin reductase 3	0.13957	5.15055	3.17894	0.00673916	0.545576
10919076	Ube3d	ubiquitin protein ligase E3D	-0.267764	5.59803	-3.17685	0.00676714	0.545576
10714413	Klf9	Kruppel-like factor 9	0.157075	8.69293	3.1719	0.00683388	0.548295
10908133	Chordc1	cysteine and histidine rich domain containing 1	0.206908	8.58762	3.15125	0.00711951	0.56772
10825074	Prpf3	pre-mRNA processing factor 3	0.122115	6.9045	3.14936	0.00714617	0.56772
10937862	Rs1	retinoschisin 1	-0.118833	4.01671	-3.14555	0.0072004	0.56772
10913590	Map4	microtubule-associated protein 4	0.0896361	5.42236	3.14469	0.00721273	0.56772
10775231	Cdc7	cell division cycle 7	0.189011	6.08205	3.13818	0.00730632	0.572374
10743857	Alox15b	arachidonate 15-lipoxygenase, type B	-0.12172	4.72773	-3.13553	0.00734477	0.572685
10728319	Vegfb	vascular endothelial growth factor B	-0.17852	8.79669	-3.13112	0.00740937	0.573766
10708903	Thap12	THAP domain containing 12	0.110503	6.23888	3.12987	0.00742773	0.573766
10789237	Defa6	defensin alpha 6	0.0952882	4.19743	3.1241	0.0075131	0.574769
10840791	Srxn1	sulfiredoxin 1	0.115012	5.54014	3.12097	0.00755981	0.574769
10919996	Manf	mesencephalic astrocyte-derived neurotrophic factor	0.182843	7.43266	3.1139	0.00766661	0.574769
10865986	Clec2e	C-type lectin domain family 2, member E	0.123323	4.07482	3.11289	0.00768184	0.574769
10882454	Ndufaf7	NADH:ubiquinone oxidoreductase complex assembly factor 7	0.189662	7.53814	3.11201	0.00769534	0.574769
10828097	Ly6g5b	lymphocyte antigen 6 family member G5B	0.121186	4.94984	3.10972	0.00773025	0.574769
10759616	Stxbp2	syntaxin binding protein 2	-0.180403	5.0984	-3.10952	0.00773345	0.574769
10747166	LOC102553069	keratin-associated protein 4-6-like	0.216829	5.83612	3.10797	0.00775723	0.574769
10734882	Per1	period circadian regulator 1	0.246259	8.28404	3.10671	0.00777655	0.574769
10756521	Cdk8	cyclin-dependent kinase 8	0.116559	9.18124	3.10577	0.00779104	0.574769
10850140	Gpcpd1	glycerophosphocholine phosphodiesterase 1	0.166432	8.76361	3.10205	0.00784873	0.574769
10801262	Rell2	RELT-like 2	-0.139426	8.03298	-3.10158	0.00785601	0.574769
10905743	Cyp2d3	cytochrome P450, family 2, subfamily d, polypeptide 3	0.145741	4.46957	3.09873	0.00790055	0.575493
10846173	Cir1	corepressor interacting with RBPJ, CIR1	0.122522	7.19887	3.09169	0.00801141	0.581019
10926596	Tcte1	t-complex-associated testis expressed 1	-0.207342	5.13607	-3.08739	0.00808002	0.583448
10787029	Mir346	microRNA 346	0.135924	7.66381	3.08183	0.00816952	0.586307
10907122	Fmnl3	formin-like 3	-0.134186	6.09357	-3.07799	0.00823187	0.586307
10809147	Usb1	U6 snRNA biogenesis phosphodiesterase 1	-0.146804	7.00587	-3.07417	0.00829434	0.586307
10836490	Csrnp3	cysteine and serine rich nuclear protein 3	0.099012	8.68279	3.07234	0.00832453	0.586307
10717069	Pde7b	phosphodiesterase 7B	-0.324761	8.73176	-3.07178	0.00833362	0.586307
10833180	Srgn	serglycin	-0.199293	7.9866	-3.07053	0.00835438	0.586307
10772342	Fryl	FRY like transcription coactivator	0.15793	7.48555	3.06978	0.00836674	0.586307
10835853	Olr404	olfactory receptor 404	0.116637	4.04906	3.06577	0.00843341	0.586416
10770984	Slc49a3	solute carrier family 49 member 3	0.141502	5.6523	3.06544	0.00843891	0.586416
10866926	Ints13	integrator complex subunit 13	0.122958	8.04431	3.0611	0.00851172	0.589011
10735217	Med11	mediator complex subunit 11	-0.155794	7.65732	-3.0553	0.00861014	0.591235
10723900	Tpbgl	trophoblast glycoprotein-like	-0.168741	6.26765	-3.05501	0.00861506	0.591235
10936346	Lonrf3	LON peptidase N-terminal domain and ring finger 3	0.273557	6.18322	3.04789	0.00873728	0.596614
10769752	Dusp12	dual specificity phosphatase 12	0.284984	7.94098	3.04628	0.00876529	0.596614
10842043	Ccn5	cellular communication network factor 5	0.172686	5.32839	3.04363	0.00881134	0.597301
10851581	Slpi	secretory leukocyte peptidase inhibitor	-0.162292	4.73337	-3.03948	0.00888395	0.599775
10906439	Slc2a13	solute carrier family 2 member 13	-0.101489	9.46259	-3.03627	0.00894054	0.60053
10918640	Tex9	testis expressed 9	-0.158279	5.95996	-3.03462	0.00896987	0.60053
10760965	Mospd3	motile sperm domain containing 3	-0.186705	8.04852	-3.03154	0.0090247	0.60053
10878112	Jun	Jun proto-oncogene, AP-1 transcription factor subunit	0.143695	8.23199	3.03043	0.00904442	0.60053
10706571	Josd2	Josephin domain containing 2	0.154618	7.75654	3.02868	0.00907593	0.60053
10724264	Olr94	olfactory receptor 94	-0.12194	4.29973	-3.02323	0.00917431	0.604631
10724888	rnf141	ring finger protein 141	0.145843	9.50398	3.01858	0.00925896	0.607223
10806456	RGD1308706	similar to RIKEN cDNA 4921524J17	0.132158	6.83805	3.01707	0.00928677	0.607223
10833814	Foxo3	forkhead box O3	0.137038	8.71584	3.01196	0.00938102	0.61098
10704499	Ap2s1	adaptor related protein complex 2 subunit sigma 1	0.117986	8.02085	3.00449	0.00952079	0.613661
10785773	Spry2	sprouty RTK signaling antagonist 2	-0.117844	7.32136	-3.00161	0.00957515	0.613661
10779108	Mss51	MSS51 mitochondrial translational activator	0.171502	4.49844	2.99818	0.00964019	0.613661
10844286	Uck1	uridine-cytidine kinase 1	0.11507	8.12559	2.99601	0.0096817	0.613661
10843793	Notch1	notch receptor 1	-0.115755	7.03309	-2.9946	0.00970877	0.613661
10803505	LOC498829	Ab2-143	-0.111594	6.41731	-2.99438	0.00971293	0.613661
10858207	Dcp1b	decapping mRNA 1B	-0.142767	7.42029	-2.99419	0.00971654	0.613661
10798780	Zeb1	zinc finger E-box binding homeobox 1	-0.15319	8.04228	-2.99413	0.00971777	0.613661
10832034	Cpne5	copine 5	-0.159038	8.44221	-2.98711	0.00985343	0.61987
10822242	Ca3	carbonic anhydrase 3	-1.86183	5.5972	-2.98126	0.00996816	0.624721
10738168	Krtap31-1	keratin associated protein 31-1	0.12874	7.62278	2.97757	0.0100411	0.625478
10891679	Gpr68	G protein-coupled receptor 68	0.208264	6.21712	2.97684	0.0100555	0.625478
10748958	Nt5c	5', 3'-nucleotidase, cytosolic	-0.127269	5.44679	-2.97165	0.0101592	0.628021
10733065	Olr1386	olfactory receptor 1386	0.118523	4.0023	2.96918	0.0102089	0.628021
10798094	Fam50b	family with sequence similarity 50, member B	-0.11862	4.06444	-2.96913	0.0102099	0.628021
10714636	Cdc37l1	cell division cycle 37-like 1	0.0922408	8.88112	2.96271	0.0103402	0.63369
10921290	Tbc1d5	TBC1 domain family, member 5	0.095758	7.9607	2.9605	0.0103856	0.63413
10818257	Lamtor5	late endosomal/lysosomal adaptor, MAPK and MTOR activator 5	0.149824	7.43942	2.95732	0.0104509	0.63442
10827673	Mog	myelin oligodendrocyte glycoprotein	0.288443	9.53726	2.94652	0.0106762	0.63442
10835692	Hspa5	heat shock protein family A (Hsp70) member 5	0.133445	10.7501	2.94386	0.0107325	0.63442
10745757	Dhrs11	dehydrogenase/reductase 11	-0.210211	6.11576	-2.94329	0.0107445	0.63442
10762231	Oas1h	2 ' -5 ' oligoadenylate synthetase 1H	0.114351	4.08614	2.94218	0.010768	0.63442
10763969	Ppp1r15b	protein phosphatase 1, regulatory subunit 15B	0.110589	8.07343	2.94198	0.0107722	0.63442
10828723	Fance	FA complementation group E	0.124048	5.69431	2.93999	0.0108147	0.63442
10877206	Inip	INTS3 and NABP interacting protein	0.150651	7.45251	2.93996	0.0108152	0.63442
10783868	Tinf2	TERF1 interacting nuclear factor 2	-0.139885	7.74795	-2.93989	0.0108168	0.63442
10712477	Lsp1	lymphocyte-specific protein 1	-0.163758	5.26291	-2.93642	0.0108912	0.63442
10819305	Emcn	endomucin	-0.164454	6.61179	-2.93257	0.0109742	0.63442
10933557	Gja6	gap junction protein, alpha 6	0.205123	5.92268	2.93205	0.0109855	0.63442
10761128	Hspb1	heat shock protein family B (small) member 1	0.387038	5.31997	2.93193	0.0109882	0.63442
10814194	Rbis	ribosomal biogenesis factor	0.122313	6.09808	2.93084	0.0110117	0.63442
10781282	Nkx2-6	NK2 homeobox 6	-0.133481	4.88464	-2.92883	0.0110555	0.63442
10706454	Klk4	kallikrein-related peptidase 4	-0.121614	4.67828	-2.92837	0.0110657	0.63442
10940513	Rhox5	Rhox homeobox family member 5	0.10676	5.02892	2.92639	0.0111089	0.63442
10862361	Pdia4	protein disulfide isomerase family A, member 4	0.202915	8.11629	2.92495	0.0111406	0.63442
10714348	Abhd17b	abhydrolase domain containing 17B, depalmitoylase	0.140634	7.84484	2.92184	0.0112091	0.63442
10821989	Npr3	natriuretic peptide receptor 3	0.132524	4.99807	2.91824	0.011289	0.63442
10825403	Tent5c	terminal nucleotidyltransferase 5C	-0.291419	5.36593	-2.91726	0.0113108	0.63442
10732511	Jmjd8	jumonji domain containing 8	-0.109644	9.94504	-2.91647	0.0113284	0.63442
10791612	Cldn24	claudin 24	0.115314	4.23911	2.91413	0.0113808	0.63442
10868595	Hrct1	histidine rich carboxyl terminus 1	-0.19279	5.36045	-2.91302	0.0114059	0.63442
10930164	Gin1	gypsy retrotransposon integrase 1	-0.167301	5.71838	-2.91287	0.0114092	0.63442
10913469	Pfkfb4	6-phosphofructo-2-kinase/fructose-2,6-biphosphatase 4	-0.131638	6.55025	-2.91222	0.0114237	0.63442
10931034	Lrg1	leucine-rich alpha-2-glycoprotein 1	0.15583	4.40799	2.91013	0.011471	0.63442
10734975	Tp53	tumor protein p53	-0.161082	7.93009	-2.90893	0.0114981	0.63442
10898029	Xrcc6	X-ray repair cross complementing 6	0.106627	7.24137	2.90386	0.0116137	0.638677
10830491	Ak9	adenylate kinase 9	-0.18129	4.02454	-2.90063	0.0116878	0.640632
10855383	Gimap9	GTPase, IMAP family member 9	-0.235538	4.49123	-2.89621	0.0117901	0.641358
10928888	Cxcr1	C-X-C motif chemokine receptor 1	0.0860891	4.28572	2.89616	0.0117914	0.641358
10812438	Acot12	acyl-CoA thioesterase 12	-0.081698	4.32443	-2.88873	0.0119653	0.641358
10745834	Appbp2	amyloid beta precursor protein binding protein 2	0.137702	9.09945	2.88491	0.0120557	0.641358
10804875	Fech	ferrochelatase	-0.114894	7.31168	-2.88242	0.0121149	0.641358
10812412	Tmem167a	transmembrane protein 167A	0.116055	9.79944	2.88015	0.0121694	0.641358
10719383	Foxa3	forkhead box A3	0.110631	4.41059	2.88005	0.0121718	0.641358
10739490	Slc9a3r1	SLC9A3 regulator 1	-0.118321	8.46358	-2.87944	0.0121864	0.641358
10918490	Foxb1	forkhead box B1	0.109547	4.85568	2.87769	0.0122284	0.641358
10735647	P2rx5	purinergic receptor P2X 5	0.144725	4.96641	2.87725	0.012239	0.641358
10730898	Gpam	glycerol-3-phosphate acyltransferase, mitochondrial	-0.159654	8.82451	-2.87559	0.0122792	0.641358
10803671	Creb1	cAMP responsive element binding protein 1	0.163885	7.61032	2.87554	0.0122804	0.641358
10820170	Adgrv1	adhesion G protein-coupled receptor V1	-0.30255	4.48678	-2.87429	0.0123107	0.641358
10729979	Fra10ac1	FRA10A associated CGG repeat 1	0.142724	5.21037	2.87143	0.01238	0.641358
10764214	Lmod1	leiomodin 1	0.146669	5.0407	2.86725	0.0124823	0.641358
10827201	Clca1	chloride channel accessory 1	0.119398	4.28401	2.86381	0.0125674	0.641358
10937719	Piga	phosphatidylinositol glycan anchor biosynthesis, class A	0.173517	6.44722	2.8618	0.0126172	0.641358
10855363	Lrrc61	leucine rich repeat containing 61	-0.157916	8.21067	-2.86125	0.0126308	0.641358
10856424	Retsat	retinol saturase	0.61805	8.36791	2.85789	0.0127147	0.641358
10723720	Thrsp	thyroid hormone responsive	0.353162	7.18866	2.85632	0.0127541	0.641358
10704281	Zbtb45	zinc finger and BTB domain containing 45	-0.151211	7.08667	-2.85461	0.0127969	0.641358
10898456	Creld2	cysteine-rich with EGF-like domains 2	0.225357	6.6268	2.85233	0.0128545	0.641358
10744947	Serpinf2	serpin family F member 2	0.127594	4.50708	2.85195	0.012864	0.641358
10765040	Gas5	growth arrest specific 5	0.370368	6.8756	2.85141	0.0128779	0.641358
10798027	Ly86	lymphocyte antigen 86	-0.186377	5.55266	-2.85067	0.0128967	0.641358
10858165	Cxcl12	C-X-C motif chemokine ligand 12	-0.13622	8.94555	-2.84894	0.0129406	0.641358
10818983	Tifa	TRAF-interacting protein with forkhead-associated domain	0.150827	4.59212	2.84825	0.012958	0.641358
10936742	Gpr34	G protein-coupled receptor 34	-0.215808	7.13363	-2.84815	0.0129607	0.641358
10840020	Cdc25b	cell division cycle 25B	-0.235328	7.29138	-2.84795	0.0129659	0.641358
10826985	Dapp1	dual adaptor of phosphotyrosine and 3-phosphoinositides 1	-0.161104	5.66651	-2.84757	0.0129754	0.641358
10932912	Alas2	5'-aminolevulinate synthase 2	-0.796092	6.48165	-2.84451	0.0130538	0.641409
10748601	Abca8a	ATP-binding cassette, subfamily A (ABC1), member 8a	0.235347	6.84652	2.84346	0.0130808	0.641409
10921447	Taf8	TATA-box binding protein associated factor 8	0.113842	7.64059	2.84297	0.0130936	0.641409
10860457	Sema3e	semaphorin 3E	0.114443	7.42748	2.84152	0.013131	0.641409
10858967	Tnfrsf1a	TNF receptor superfamily member 1A	-0.175254	5.46763	-2.83779	0.0132277	0.64171
10840477	Cfap61	cilia and flagella associated protein 61	-0.177165	6.29524	-2.83252	0.0133655	0.64171
10928084	Ankrd44	ankyrin repeat domain 44	0.12612	6.20591	2.83205	0.0133776	0.64171
10808461	Banp	Btg3 associated nuclear protein	0.181709	7.88252	2.83113	0.0134021	0.64171
10830989	Ppp1r10	protein phosphatase 1, regulatory subunit 10	-0.0896604	7.21736	-2.83003	0.013431	0.64171
10753067	Cfap298	cilia and flagella associated protein 298	-0.128062	7.06306	-2.82976	0.013438	0.64171
10844015	RGD1306233	similar to hypothetical protein MGC29761	-0.312734	4.72965	-2.82922	0.0134524	0.64171
10852736	Xrcc2	X-ray repair cross complementing 2	0.151386	5.02541	2.82879	0.0134637	0.64171
10762665	Pxn	paxillin	0.101379	7.31254	2.82639	0.0135275	0.64171
10750106	LOC102551406	keratin-associated protein 20-2-like	0.195771	4.53948	2.82524	0.0135581	0.64171
10860916	Slc25a13	solute carrier family 25 member 13	0.231457	5.92495	2.82375	0.013598	0.64171
10786032	Zic5	Zic family member 5	-0.149434	5.9724	-2.8231	0.0136153	0.64171
10787313	Slc27a1	solute carrier family 27 member 1	-0.156819	8.74646	-2.82035	0.013689	0.64171
10897485	Gga1	golgi associated, gamma adaptin ear containing, ARF binding protein 1	-0.0932375	7.62591	-2.81794	0.0137541	0.64171
10891548	Eml5	EMAP like 5	-0.134201	8.62685	-2.81391	0.0138635	0.64171
10756280	Cbx3	chromobox 3	0.274378	5.69507	2.8127	0.0138964	0.64171
10765469	Sh2d1b	SH2 domain containing 1B	-0.271192	6.41121	-2.81144	0.0139308	0.64171
10825488	Mab21l3	mab-21 like 3	0.112123	4.60682	2.81021	0.0139645	0.64171
10834447	Egfl7	EGF-like-domain, multiple 7	-0.141848	6.50135	-2.80716	0.0140485	0.64171
10813128	Arl15	ADP-ribosylation factor like GTPase 15	-0.119293	9.02936	-2.80563	0.0140907	0.64171
10939927	Mir504	microRNA 504	0.124953	6.24356	2.80371	0.014144	0.64171
10934546	Magee2	MAGE family member E2	-0.348056	5.84215	-2.80297	0.0141646	0.64171
10907056	Dhh	desert hedgehog signaling molecule	-0.0890968	4.29672	-2.8023	0.0141832	0.64171
10807174	Nol3	nucleolar protein 3	0.109655	6.95377	2.80111	0.0142164	0.64171
10765744	Pigm	phosphatidylinositol glycan anchor biosynthesis, class M	0.140331	7.49311	2.79932	0.0142664	0.64171
10791497	Hmgb2	high mobility group box 2	0.141131	5.10035	2.79883	0.0142802	0.64171
10828841	LOC100910615	allatostatin-A receptor-like	0.246375	4.55382	2.79586	0.0143638	0.64171
10936134	Ikbkg	inhibitor of nuclear factor kappa B kinase regulatory subunit gamma	0.0999555	6.11381	2.79448	0.0144026	0.64171
10775407	Aff1	AF4/FMR2 family, member 1	0.152986	6.43878	2.79082	0.0145066	0.64171
10869912	Zfp352	zinc finger protein 352	0.10016	4.01394	2.79014	0.0145259	0.64171
10736413	Mir193	microRNA 193	0.117722	4.36696	2.78932	0.0145493	0.64171
10787565	Klhl26	kelch-like family member 26	0.16349	6.21271	2.78524	0.0146663	0.64171
10818606	Lrrc39	leucine rich repeat containing 39	-0.0877751	4.14633	-2.78414	0.0146979	0.64171
10806724	Mir181c	microRNA 181c	0.117847	5.88426	2.78346	0.0147175	0.64171
10812903	Smim15	small integral membrane protein 15	0.118128	7.04075	2.782	0.0147597	0.64171
10771258	Slc10a6	solute carrier family 10 member 6	0.194957	4.85266	2.78158	0.014772	0.64171
10767605	Cntn2	contactin 2	0.14193	8.08404	2.77888	0.0148503	0.64171
10915751	Anln	anillin, actin binding protein	0.28054	6.52661	2.77569	0.0149436	0.64171
10776361	Cracd	capping protein inhibiting regulator of actin dynamics	-0.0962959	7.0308	-2.77549	0.0149496	0.64171
10815974	Fstl5	follistatin-like 5	-0.116582	8.36577	-2.77344	0.0150098	0.64171
10933809	Tmem47	transmembrane protein 47	-0.112767	11.0267	-2.77166	0.0150622	0.64171
10720510	Sipa1l3	signal-induced proliferation-associated 1 like 3	-0.15578	7.01446	-2.77026	0.0151037	0.64171
10891949	Serpina1	serpin family A member 1	-0.154346	4.21811	-2.76901	0.0151408	0.64171
10736486	Cpd	carboxypeptidase D	0.0918115	8.59984	2.76755	0.0151841	0.64171
10716136	Pdcd4	programmed cell death 4	-0.143917	10.0654	-2.76704	0.0151994	0.64171
10922692	Lipt1	lipoyltransferase 1	-0.133419	5.19281	-2.76568	0.0152399	0.64171
10707935	Rgma	repulsive guidance molecule BMP co-receptor a	-0.165795	7.51793	-2.76477	0.0152672	0.64171
10797966	Dsp	desmoplakin	-0.11841	4.60663	-2.7639	0.0152931	0.64171
10809328	Herpud1	homocysteine inducible ER protein with ubiquitin like domain 1	0.158999	7.38479	2.76321	0.0153139	0.64171
10825712	Ddx20	DEAD-box helicase 20	0.113531	7.10606	2.76195	0.0153518	0.64171
10931038	Plin5	perilipin 5	0.095152	4.69537	2.76177	0.0153571	0.64171
10829896	Atoh7	atonal bHLH transcription factor 7	0.167214	5.32486	2.76033	0.0154005	0.64171
10872852	Stpg1	sperm-tail PG-rich repeat containing 1	-0.297255	6.29502	-2.75714	0.0154972	0.64171
10844542	Gapvd1	GTPase activating protein and VPS9 domains 1	0.0769507	7.80676	2.75702	0.0155009	0.64171
10708349	Adamtsl3	ADAMTS-like 3	0.108177	5.45718	2.75647	0.0155174	0.64171
10710494	Eef2k	eukaryotic elongation factor-2 kinase	0.113635	5.54568	2.75609	0.0155291	0.64171
10862728	Lsm5	LSM5 homolog, U6 small nuclear RNA and mRNA degradation associated	-0.234305	4.76148	-2.75399	0.0155932	0.64171
10781849	Lmo7	LIM domain 7	-0.16875	7.96294	-2.75354	0.0156069	0.64171
10847806	Ehf	ets homologous factor	0.0980704	4.02449	2.75323	0.0156163	0.64171
10774163	LOC688553	hypothetical protein LOC688553	-0.134724	5.011	-2.75286	0.0156276	0.64171
10938286	Mageb7	MAGE family member B7	0.138229	4.16227	2.75163	0.0156655	0.64171
10717311	Slc18b1	solute carrier family 18 member B1	-0.155887	7.54013	-2.75089	0.0156883	0.64171
10721841	Dhdh	dihydrodiol dehydrogenase	-0.127293	7.59525	-2.74928	0.0157376	0.64171
10840262	Btbd3	BTB domain containing 3	-0.123765	10.2879	-2.74841	0.0157646	0.64171
10743874	Gucy2d	guanylate cyclase 2D, retinal	0.0953551	4.63511	2.74415	0.0158968	0.64551
10706272	LOC102555672	zinc finger protein 850-like	0.13995	7.78607	2.73953	0.016041	0.646017
10831523	Tsbp1	testis expressed basic protein 1	0.105136	4.91769	2.73462	0.016196	0.646017
10711219	Stx4	syntaxin 4	0.101376	7.4621	2.73141	0.0162982	0.646017
10819874	Tnni3k	TNNI3 interacting kinase	-0.121305	5.33852	-2.73121	0.0163046	0.646017
10873018	Tex46	testis expressed 46	0.113497	4.47059	2.73098	0.0163121	0.646017
10936976	Pcsk1n	proprotein convertase subtilisin/kexin type 1 inhibitor	-0.17065	10.1606	-2.73007	0.0163411	0.646017
10826451	Slc44a3	solute carrier family 44, member 3	-0.113859	4.51997	-2.72691	0.0164425	0.646017
10733896	Olr1452	olfactory receptor 1452	0.121024	4.23826	2.72621	0.0164649	0.646017
10894427	Ube2r2	ubiquitin-conjugating enzyme E2R 2	-0.097556	9.72191	-2.72584	0.0164769	0.646017
10874019	Srm	spermidine synthase	-0.113099	9.14611	-2.72541	0.0164907	0.646017
10887774	Rapgef5	Rap guanine nucleotide exchange factor 5	0.0934431	8.94319	2.72512	0.0165	0.646017
10806779	Rln3	relaxin 3	0.107139	4.8877	2.72443	0.0165222	0.646017
10933345	Tlr7	toll-like receptor 7	0.155851	6.62844	2.72392	0.016539	0.646017
10704578	Ccdc8	coiled-coil domain containing 8	0.115922	4.66647	2.72306	0.0165666	0.646017
10830791	Olr1694	olfactory receptor 1694	0.0991365	4.11774	2.71904	0.0166974	0.646017
10726669	Cox8b	cytochrome c oxidase, subunit VIIIb	-0.0989464	4.02654	-2.71811	0.0167279	0.646017
10714524	Dmrt3	doublesex and mab-3 related transcription factor 3	-0.0901119	4.94367	-2.71732	0.0167538	0.646017
10801176	Pcdhb6	protocadherin beta 6	-0.431219	5.04854	-2.71706	0.0167623	0.646017
10737194	Rpl18	ribosomal protein L18	0.222203	6.09759	2.71698	0.016765	0.646017
10825443	Cd101	CD101 molecule	0.122443	6.53766	2.71488	0.0168338	0.647009
10804017	Diaph1	diaphanous-related formin 1	-0.136703	6.60669	-2.71383	0.0168687	0.647009
10726880	Muc6	mucin 6, oligomeric mucus/gel-forming	0.0837299	4.8396	2.71149	0.016946	0.647755
10844223	Ptges	prostaglandin E synthase	0.102389	5.17632	2.71088	0.0169661	0.647755
10875102	Mcmdc2	minichromosome maintenance domain containing 2	-0.273318	5.46245	-2.70726	0.0170866	0.649904
10772863	Arap2	ArfGAP with RhoGAP domain, ankyrin repeat and PH domain 2	0.150278	8.03367	2.70499	0.0171626	0.649904
10718504	Lilrc2	leukocyte immunoglobulin-like receptor, subfamily C, member 2	0.104402	4.46342	2.70373	0.017205	0.649904
10907681	Zfp385a	zinc finger protein 385A	-0.12418	8.27978	-2.70281	0.0172359	0.649904
10712086	Olr315	olfactory receptor 315	0.120071	4.04326	2.70058	0.0173112	0.649904
10761010	Echdc2	enoyl CoA hydratase domain containing 2	-0.102065	5.41551	-2.69993	0.017333	0.649904
10713538	Plaat3	phospholipase A and acyltransferase 3	0.159447	6.48709	2.69835	0.0173869	0.649904
10926390	Dnph1	2'-deoxynucleoside 5'-phosphate N-hydrolase 1	0.150057	4.98021	2.69775	0.0174072	0.649904
10818452	Slc25a24	solute carrier family 25 member 24	-0.19933	5.30798	-2.69678	0.0174401	0.649904
10707177	Nav2	neuron navigator 2	0.108242	7.31662	2.69436	0.0175227	0.649904
10714353	Cemip2	cell migration inducing hyaluronidase 2	0.193688	6.70796	2.69428	0.0175256	0.649904
10900097	Olr1070	olfactory receptor 1070	0.157291	4.60056	2.69376	0.0175435	0.649904
10889541	Slc26a4	solute carrier family 26 member 4	0.131033	4.59634	2.69273	0.0175787	0.649904
10718924	Ncr1	natural cytotoxicity triggering receptor 1	-0.0865954	4.47967	-2.69149	0.0176212	0.649904
10717141	Arhgap18	Rho GTPase activating protein 18	-0.334524	7.15208	-2.68924	0.0176991	0.649904
10713382	Pygm	glycogen phosphorylase, muscle associated	-0.10156	8.89395	-2.68861	0.0177207	0.649904
10768138	Ptprc	protein tyrosine phosphatase, receptor type, C	-0.120261	4.74581	-2.68705	0.017775	0.649904
10926386	LOC681367	hypothetical protein LOC681367	-0.1276	6.78282	-2.68687	0.0177812	0.649904
10830456	Cdk19	cyclin-dependent kinase 19	0.0983228	8.6934	2.68678	0.0177841	0.649904
10774045	Ogdh	oxoglutarate dehydrogenase	-0.0953851	9.6688	-2.68533	0.0178346	0.649904
10712064	Olr302	olfactory receptor 302	0.11978	4.14286	2.68449	0.017864	0.649904
10769441	LOC498265	similar to hypothetical protein FLJ10706	0.114694	4.56351	2.68393	0.0178833	0.649904
10937048	Tfe3	transcription factor binding to IGHM enhancer 3	-0.111138	7.29882	-2.68206	0.0179487	0.65083
10880124	Sdc3	syndecan 3	-0.0928917	9.40866	-2.67986	0.0180261	0.65083
10880552	Ldlrap1	low density lipoprotein receptor adaptor protein 1	0.158837	6.28294	2.67985	0.0180264	0.65083
10733553	Irf1	interferon regulatory factor 1	-0.0912572	5.11514	-2.67735	0.0181147	0.651595
10822678	Samd7	sterile alpha motif domain containing 7	0.0995703	4.7202	2.67703	0.018126	0.651595
10918288	Plekho2	pleckstrin homology domain containing O2	-0.161011	7.42713	-2.67546	0.0181816	0.651937
10767186	Htr5b	5-hydroxytryptamine (serotonin) receptor 5B	-0.0912855	4.24839	-2.67454	0.018214	0.651937
10863502	Wdr54	WD repeat domain 54	-0.200724	8.86237	-2.67216	0.0182989	0.653273
10802639	Cfap53	cilia and flagella associated protein 53	-0.115001	4.54031	-2.67129	0.01833	0.653273
10919266	Ankrd34c	ankyrin repeat domain 34C	-0.196146	7.23691	-2.66922	0.0184042	0.65451
10881820	Spsb1	splA/ryanodine receptor domain and SOCS box containing 1	0.122488	6.71362	2.66734	0.0184719	0.655467
10863184	Atoh8	atonal bHLH transcription factor 8	0.135367	5.35492	2.66628	0.01851	0.655467
10753470	C2cd2	C2 calcium-dependent domain containing 2	0.126923	7.21541	2.66433	0.0185804	0.656562
10900753	Ptbp1	polypyrimidine tract binding protein 1	-0.1417	8.47377	-2.66046	0.0187215	0.657138
10792251	Star	steroidogenic acute regulatory protein	-0.0737507	4.90211	-2.65912	0.0187701	0.657138
10779130	Cfap70	cilia and flagella associated protein 70	-0.149769	6.85406	-2.65897	0.0187759	0.657138
10751993	Tbccd1	TBCC domain containing 1	0.113735	7.84384	2.65733	0.0188361	0.657138
10874024	Masp2	MBL associated serine protease 2	0.104382	4.4059	2.65694	0.0188501	0.657138
10889919	Gpr33	G protein-coupled receptor 33	0.100055	4.37244	2.65552	0.0189025	0.657138
10881451	LOC102551014	zinc finger protein 624-like	0.196281	7.10046	2.65442	0.0189432	0.657138
10711532	Btbd16	BTB domain containing 16	-0.131279	4.48648	-2.65415	0.0189529	0.657138
10783083	Tep1	telomerase associated protein 1	-0.111584	5.6143	-2.65086	0.0190748	0.658146
10715541	Cpn1	carboxypeptidase N subunit 1	-0.13755	4.18889	-2.65071	0.0190804	0.658146
10811589	Rnf166	ring finger protein 166	-0.10718	7.04661	-2.64922	0.019136	0.658146
10813029	Slc38a9	solute carrier family 38, member 9	0.0877294	7.102	2.64774	0.0191913	0.658146
10864025	Cfap100	cilia and flagella associated protein 100	-0.18841	4.10784	-2.64692	0.0192218	0.658146
10851670	Pltp	phospholipid transfer protein	-0.120802	9.53398	-2.64519	0.0192868	0.658146
10727260	Ccnd1	cyclin D1	-0.140839	7.68816	-2.64434	0.0193186	0.658146
10754401	Mix23	mitochondrial matrix import factor 23	-0.162904	5.54108	-2.64387	0.0193363	0.658146
10830615	Pdss2	decaprenyl diphosphate synthase subunit 2	0.117029	6.25447	2.64381	0.0193386	0.658146
10733906	Olr1458	olfactory receptor 1458	0.0968614	4.37136	2.64159	0.0194223	0.659645
10933017	Phf8	PHD finger protein 8	0.0902132	6.56094	2.63299	0.0197505	0.668059
10848539	Ino80	INO80 complex ATPase subunit	-0.0882736	7.87732	-2.62754	0.0199612	0.671837
10788592	Wrn	WRN RecQ like helicase	0.222297	5.96551	2.62528	0.0200491	0.671837
10772243	Pdcl2	phosducin-like 2	-0.144849	4.18728	-2.62522	0.0200512	0.671837
10854645	Tbxas1	thromboxane A synthase 1	0.146423	4.37829	2.62505	0.020058	0.671837
10742213	Adra1b	adrenoceptor alpha 1B	0.228177	6.64639	2.62488	0.0200645	0.671837
10886453	Rin3	Ras and Rab interactor 3	0.135988	5.15877	2.61977	0.0202651	0.676508
10828288	Ppt2	palmitoyl-protein thioesterase 2	-0.0967807	7.46632	-2.61882	0.0203026	0.676508
10772325	Lrrc66	leucine rich repeat containing 66	-0.117419	4.69307	-2.61561	0.0204294	0.676508
10808177	Clec3a	C-type lectin domain family 3, member A	0.167614	4.49701	2.61305	0.0205315	0.676508
10790510	Opn4	opsin 4	0.0864841	4.47571	2.61258	0.0205503	0.676508
10801167	Pcdhb2	protocadherin beta 2	0.201872	5.60554	2.61172	0.0205849	0.676508
10705806	Zfp420	zinc finger protein 420	0.169761	6.12337	2.61116	0.0206071	0.676508
10905316	Rac2	Rac family small GTPase 2	-0.196639	5.74934	-2.60955	0.0206717	0.676508
10708262	Slc28a1	solute carrier family 28 member 1	0.102739	4.24134	2.60855	0.0207119	0.676508
10706339	Etfb	electron transfer flavoprotein subunit beta	0.154213	8.65937	2.60827	0.0207233	0.676508
10836570	Nostrin	nitric oxide synthase trafficking	0.133396	5.19183	2.6071	0.0207703	0.676508
10777731	Nsd2	nuclear receptor binding SET domain protein 2	0.102099	6.15805	2.60655	0.0207926	0.676508
10802422	Tubb6	tubulin, beta 6 class V	-0.135515	5.59391	-2.60555	0.020833	0.676508
10718552	Ndufa3	NADH:ubiquinone oxidoreductase subunit A3	-0.19275	9.0743	-2.6054	0.0208391	0.676508
10753143	Dnajc28	DnaJ heat shock protein family (Hsp40) member C28	0.157236	7.01553	2.60506	0.020853	0.676508
10905607	Chadl	chondroadherin-like	0.103023	5.86321	2.60499	0.0208557	0.676508
10739516	Otop3	otopetrin 3	0.118177	4.54852	2.60141	0.0210012	0.677328
10928902	Tmbim1	transmembrane BAX inhibitor motif containing 1	0.142737	7.03337	2.60016	0.0210523	0.677328
10731753	Coro7	coronin 7	-0.133871	7.46579	-2.5994	0.0210832	0.677328
10889684	Bzw2	basic leucine zipper and W2 domains 2	-0.0822326	8.26023	-2.59929	0.0210879	0.677328
10877069	Lpar1	lysophosphatidic acid receptor 1	0.267493	8.55393	2.59805	0.0211387	0.677328
10879442	Mir30c1	microRNA 30c-1	0.095259	4.59437	2.59766	0.0211549	0.677328
10872015	Eva1b	eva-1 homolog B	-0.171141	5.92146	-2.59711	0.0211773	0.677328
10823363	P2ry13	purinergic receptor P2Y13	-0.134201	7.62355	-2.59638	0.0212075	0.677328
10923567	Nif3l1	NGG1 interacting factor 3 like 1	0.114816	6.53018	2.59539	0.0212481	0.677328
10737134	Mir301a	microRNA 301a	-0.134939	4.48843	-2.59422	0.0212965	0.677573
10736050	RGD1565611	RGD1565611	-0.15128	4.47049	-2.59055	0.0214486	0.679762
10841468	Spag4	sperm associated antigen 4	0.126987	5.93453	2.59045	0.0214529	0.679762
10893247	Sarnp	SAP domain containing ribonucleoprotein	-0.104165	10.5353	-2.58905	0.0215115	0.679762
10819890	Zranb2	zinc finger RANBP2-type containing 2	-0.0820701	9.39159	-2.58863	0.0215291	0.679762
10784478	Blk	BLK proto-oncogene, Src family tyrosine kinase	0.108657	5.02612	2.58639	0.0216225	0.681417
10854093	Fam71f2	family with sequence similarity 71, member F2	0.105097	4.02852	2.58111	0.0218454	0.687137
10786646	Sema3g	semaphorin 3G	0.135917	4.76585	2.57953	0.0219123	0.687142
10745871	Ints2	integrator complex subunit 2	0.110449	7.10033	2.57888	0.02194	0.687142
10917346	Fdx1	ferredoxin 1	0.0965914	6.06239	2.57818	0.0219697	0.687142
10742968	Fam183a	family with sequence similarity 183 member A	-0.413277	5.68012	-2.57508	0.0221022	0.687617
10925933	Tmem200c	transmembrane protein 200C	0.174666	7.56276	2.57454	0.0221253	0.687617
10702424	Rnf146	ring finger protein 146	0.131907	6.16511	2.57147	0.0222576	0.687617
10776325	Thegl	theg spermatid protein-like	-0.110647	4.008	-2.57116	0.0222708	0.687617
10727999	Fam89b	family with sequence similarity 89, member B	0.117578	7.35141	2.57109	0.0222741	0.687617
10738591	Fzd2	frizzled class receptor 2	-0.198001	6.5551	-2.57099	0.0222782	0.687617
10836166	Tas2r134	taste receptor, type 2, member 134	0.0991735	4.26055	2.569	0.0223643	0.687617
10898474	Pim3	Pim-3 proto-oncogene, serine/threonine kinase	0.0915431	6.88647	2.56887	0.0223701	0.687617
10737075	Bcas3	BCAS3, microtubule associated cell migration factor	0.0765329	8.28147	2.56881	0.0223727	0.687617
10724319	Hbb-b1	hemoglobin, beta adult major chain	-0.710193	9.69633	-2.56762	0.0224243	0.687617
10842475	Ptpn1	protein tyrosine phosphatase, non-receptor type 1	0.151231	8.23353	2.56691	0.0224549	0.687617
10764529	Brinp3	BMP/retinoic acid inducible neural specific 3	-0.15191	8.50065	-2.56627	0.0224831	0.687617
10852019	Nfatc2	nuclear factor of activated T-cells 2	-0.156834	5.11775	-2.56535	0.0225231	0.687617
10714136	Lpxn	leupaxin	-0.0845428	5.5652	-2.56339	0.0226088	0.687865
10902290	Nav3	neuron navigator 3	-0.132584	7.33932	-2.56222	0.0226602	0.687865
10928952	Rnf25	ring finger protein 25	-0.0841554	8.44586	-2.5593	0.0227886	0.687865
10858160	Depp1	DEPP1, autophagy regulator	0.0977608	4.18551	2.55912	0.0227967	0.687865
10907679	Gpr84	G protein-coupled receptor 84	-0.125171	5.37561	-2.55905	0.0227995	0.687865
10731130	Pdzd8	PDZ domain containing 8	-0.093854	8.69413	-2.5587	0.022815	0.687865
10768538	Swt1	SWT1 RNA endoribonuclease homolog	0.0975295	6.38747	2.55796	0.022848	0.687865
10703864	Zfp583	zinc finger protein 583	-0.129702	7.03062	-2.55758	0.0228646	0.687865
10885382	Mthfd1	methylenetetrahydrofolate dehydrogenase, cyclohydrolase and formyltetrahydrofolate synthetase 1	-0.12659	7.47535	-2.55669	0.022904	0.687865
10728703	Ppp1r32	protein phosphatase 1, regulatory subunit 32	-0.349004	5.31153	-2.55392	0.0230272	0.690026
10758744	Ptpn11	protein tyrosine phosphatase, non-receptor type 11	0.117145	7.77067	2.55167	0.0231278	0.690026
10867955	Epha7	Eph receptor A7	0.0991875	8.92366	2.55081	0.0231661	0.690026
10880805	Alpl	alkaline phosphatase, biomineralization associated	-0.130389	6.82198	-2.55077	0.0231681	0.690026
10934526	Zcchc13	zinc finger CCHC-type containing 13	0.143662	4.64015	2.54862	0.0232647	0.690026
10803238	Npc1	NPC intracellular cholesterol transporter 1	0.162128	8.01698	2.54789	0.0232974	0.690026
10822269	Lrrcc1	leucine rich repeat and coiled-coil centrosomal protein 1	-0.141419	4.48229	-2.54675	0.0233488	0.690026
10853819	Met	MET proto-oncogene, receptor tyrosine kinase	0.160083	4.79243	2.54666	0.0233532	0.690026
10727232	Ano1	anoctamin 1	-0.217583	5.70739	-2.54532	0.0234139	0.690026
10812775	Cd180	CD180 molecule	-0.23673	5.94076	-2.54463	0.0234451	0.690026
10748253	Smarcd2	SWI/SNF related, matrix associated, actin dependent regulator of chromatin, subfamily d, member 2	0.0989396	6.41739	2.54359	0.0234922	0.690026
10831199	Gpank1	G patch domain and ankyrin repeats 1	0.116422	5.63899	2.54329	0.023506	0.690026
10708015	Isg20	interferon stimulated exonuclease gene 20	-0.100251	5.79694	-2.54307	0.0235161	0.690026
10790660	RGD1311847	similar to 1700030K09Rik protein	-0.0780381	5.86874	-2.53781	0.0237562	0.695843
10721812	Ruvbl2	RuvB-like AAA ATPase 2	-0.101021	7.51628	-2.53652	0.0238157	0.696357
10815026	Fgf2	fibroblast growth factor 2	0.166727	7.4628	2.53399	0.0239325	0.698542
10729777	Ch25h	cholesterol 25-hydroxylase	0.135805	4.05213	2.53255	0.0239994	0.699266
10769723	Nos1ap	nitric oxide synthase 1 adaptor protein	0.152266	7.95167	2.53081	0.0240801	0.700389
10792101	Purg	purine-rich element binding protein G	-0.130194	7.13343	-2.52731	0.0242434	0.700911
10711163	Ctf1	cardiotrophin 1	-0.118198	5.42636	-2.52718	0.0242493	0.700911
10757098	Mir339	microRNA 339	0.0925493	6.31798	2.52602	0.0243039	0.700911
10717571	Lpcat1	lysophosphatidylcholine acyltransferase 1	-0.112795	7.73937	-2.52345	0.0244249	0.700911
10807995	Mtss2	MTSS I-BAR domain containing 2	-0.120442	9.66492	-2.52284	0.0244536	0.700911
10716984	Heca	hdc homolog, cell cycle regulator	0.107382	6.77437	2.5228	0.0244555	0.700911
10876915	Tmem245	transmembrane protein 245	0.106998	8.08303	2.52223	0.0244824	0.700911
10771751	Rchy1	ring finger and CHY zinc finger domain containing 1	0.181695	7.91721	2.52161	0.0245119	0.700911
10892939	Prim1	DNA primase subunit 1	-0.42205	8.11701	-2.52157	0.0245135	0.700911
10824541	Atp8b2	ATPase phospholipid transporting 8B2	0.137721	7.16909	2.52144	0.0245201	0.700911
10744907	Dph1	diphthamide biosynthesis 1	-0.103623	7.23833	-2.5193	0.0246215	0.701508
10802972	Mbp	myelin basic protein	0.0975899	7.74094	2.51903	0.0246342	0.701508
10813953	Zfp622	zinc finger protein 622	0.111412	5.65349	2.51833	0.0246677	0.701508
10767771	Adora1	adenosine A1 receptor	0.0978855	7.98345	2.51553	0.0248014	0.702677
10832462	RGD1563815	similar to sodium-glucose cotransporter-like 1	-0.0663511	4.04401	-2.51481	0.0248357	0.702677
10732427	Lmf1	lipase maturation factor 1	-0.113653	7.59644	-2.50935	0.0250987	0.708106
10803995	Ndufa2	NADH:ubiquinone oxidoreductase subunit A2	0.100991	6.98518	2.50906	0.0251129	0.708106
10865838	Rhno1	RAD9-HUS1-RAD1 interacting nuclear orphan 1	0.13418	5.06575	2.50718	0.0252044	0.709153
10871706	Mycl	MYCL proto-oncogene, bHLH transcription factor	0.113441	5.79879	2.50549	0.0252866	0.709153
10852682	Cnpy1	canopy FGF signaling regulator 1	0.107722	4.59928	2.50505	0.025308	0.709153
10757698	Fzd9	frizzled class receptor 9	0.102581	5.79603	2.50455	0.0253325	0.709153
10765503	Cfap126	cilia and flagella associated protein 126	-0.328461	5.76384	-2.5039	0.0253642	0.709153
10904794	LOC680875	similar to dystonin isoform 1	0.0835	4.85857	2.50221	0.0254469	0.709153
10881622	Ubiad1	UbiA prenyltransferase domain containing 1	0.162146	4.68466	2.50075	0.0255186	0.709153
10815917	Rabif	RAB interacting factor	0.128921	7.76883	2.50072	0.0255204	0.709153
10792557	Defa10	defensin alpha 10	0.0797003	4.02942	2.49886	0.0256119	0.709153
10744254	Tnk1	tyrosine kinase, non-receptor, 1	-0.087199	4.87939	-2.49864	0.0256226	0.709153
10940641	Ccnd3	cyclin D3	0.0898314	7.73055	2.49848	0.0256307	0.709153
10774253	Ikzf1	IKAROS family zinc finger 1	0.0911089	4.5407	2.49784	0.0256624	0.709153
10719243	Sae1	SUMO1 activating enzyme subunit 1	0.0960647	8.03088	2.49645	0.0257311	0.709352
10709048	C2cd3	C2 domain containing 3 centriole elongation regulator	-0.0927145	7.50531	-2.49597	0.025755	0.709352
10737609	Spop	speckle type BTB/POZ protein	0.0999052	8.51866	2.49362	0.025872	0.711394
10801794	Gramd2b	GRAM domain containing 2B	0.124098	8.70438	2.49237	0.0259344	0.71193
10765186	Sell	selectin L	-0.128533	4.60788	-2.48879	0.026114	0.712327
10747665	Etv4	ETS variant transcription factor 4	-0.0990998	5.07461	-2.48797	0.0261553	0.712327
10772653	Apbb2	amyloid beta precursor protein binding family B member 2	0.0910169	9.58381	2.48765	0.0261713	0.712327
10887068	Mir543	microRNA 543	0.115142	4.58063	2.48723	0.0261927	0.712327
10711657	Pstk	phosphoseryl-tRNA kinase	-0.0942323	8.04807	-2.48635	0.0262369	0.712327
10923358	Mars2	methionyl-tRNA synthetase 2, mitochondrial	0.147139	6.57459	2.48611	0.0262491	0.712327
10863831	Aplf	aprataxin and PNKP like factor	0.142393	5.48503	2.48427	0.0263422	0.712685
10857259	Klf15	Kruppel-like factor 15	0.0971384	4.87312	2.48415	0.0263481	0.712685
10884255	Agr2	anterior gradient 2, protein disulphide isomerase family member	-0.110862	4.07788	-2.48204	0.0264555	0.712999
10927230	Bag2	BAG cochaperone 2	0.0958826	7.08967	2.4813	0.0264931	0.712999
10709093	Ucp2	uncoupling protein 2	-0.19244	7.1894	-2.48089	0.0265141	0.712999
10895959	Myo1a	myosin IA	0.0825952	4.15726	2.48055	0.0265314	0.712999
10760068	Pan3	poly(A) specific ribonuclease subunit PAN3	0.0983382	7.24422	2.47909	0.0266062	0.713855
10833093	Macroh2a2	macroH2A.2 histone	-0.171099	8.56452	-2.47684	0.0267214	0.713919
10723457	Zfand6	zinc finger AN1-type containing 6	0.132146	7.59364	2.47621	0.026754	0.713919
10921047	Ackr2	atypical chemokine receptor 2	0.157901	6.31307	2.47586	0.0267719	0.713919
10915910	Jam3	junctional adhesion molecule 3	0.153466	7.91207	2.47491	0.0268212	0.713919
10833394	Man1a1	mannosidase, alpha, class 1A, member 1	-0.15629	6.69553	-2.47418	0.0268586	0.713919
10740185	Anapc11	anaphase promoting complex subunit 11	0.0950482	7.03775	2.47196	0.0269736	0.713919
10750191	Olig1	oligodendrocyte transcription factor 1	0.164364	8.20788	2.47189	0.0269773	0.713919
10890592	Trmt5	tRNA methyltransferase 5	-0.113382	5.52563	-2.46849	0.0271543	0.713919
10817057	S100a4	S100 calcium-binding protein A4	0.106043	5.29062	2.46758	0.0272019	0.713919
10855934	Ccser1	coiled-coil serine-rich protein 1	-0.143711	7.68651	-2.467	0.0272324	0.713919
10930094	St8sia4	ST8 alpha-N-acetyl-neuraminide alpha-2,8-sialyltransferase 4	-0.167041	6.86813	-2.46685	0.0272403	0.713919
10782437	Zfp385d	zinc finger protein 385D	-0.249683	7.49773	-2.4664	0.0272638	0.713919
10835881	Olr427	olfactory receptor 427	0.0943789	4.34833	2.46462	0.0273571	0.713919
10769595	Pogk	pogo transposable element derived with KRAB domain	0.121762	6.10397	2.46392	0.0273942	0.713919
10769879	Klhdc9	kelch domain containing 9	-0.149672	4.55509	-2.46204	0.0274934	0.713919
10710773	Kdm8	lysine demethylase 8	-0.0861363	6.38169	-2.46192	0.0274994	0.713919
10863608	Cyp26b1	cytochrome P450, family 26, subfamily b, polypeptide 1	0.271746	5.88459	2.46158	0.0275177	0.713919
10835624	Ptrh1	peptidyl-tRNA hydrolase 1 homolog	-0.169621	5.85432	-2.46089	0.0275539	0.713919
10887100	Mir377	microRNA 377	-0.17146	6.25222	-2.45995	0.027604	0.713919
10763897	Dstyk	dual serine/threonine and tyrosine protein kinase	0.0875901	7.77206	2.45982	0.0276108	0.713919
10879343	Olr869	olfactory receptor 869	0.102459	4.50714	2.45881	0.0276647	0.713919
10715359	Slc25a28	solute carrier family 25 member 28	-0.184899	8.34411	-2.45856	0.027678	0.713919
10935150	Tbc1d8b	TBC1 domain family member 8B	0.176613	5.29739	2.45683	0.0277697	0.713919
10758863	Fbxw8	F-box and WD repeat domain containing 8	0.0792569	7.44385	2.45657	0.0277837	0.713919
10837226	Dusp19	dual specificity phosphatase 19	-0.255828	8.71025	-2.45612	0.0278076	0.713919
10816017	Gask1b	golgi associated kinase 1B	-0.202247	6.83372	-2.45598	0.027815	0.713919
10723240	Cpeb1	cytoplasmic polyadenylation element binding protein 1	0.156739	6.44987	2.45337	0.0279549	0.713919
10867033	Slco1a4	solute carrier organic anion transporter family, member 1a4	-0.198465	7.7656	-2.4531	0.0279694	0.713919
10898147	Serhl2	serine hydrolase-like 2	0.150572	5.57982	2.45305	0.0279722	0.713919
10867587	Clvs1	clavesin 1	-0.0919883	8.83139	-2.45265	0.0279938	0.713919
10796402	LOC102547897	uncharacterized LOC102547897	-0.108711	5.53174	-2.45213	0.0280217	0.713919
10756767	Rbak	RB-associated KRAB zinc finger	-0.0934983	5.80522	-2.45185	0.0280367	0.713919
10706922	Mamstr	MEF2 activating motif and SAP domain containing transcriptional regulator	-0.152156	4.20281	-2.45182	0.0280387	0.713919
10764773	Rgs16	regulator of G-protein signaling 16	0.211569	6.57732	2.45047	0.0281112	0.713919
10726108	Pycard	PYD and CARD domain containing	0.108801	5.45046	2.45044	0.0281131	0.713919
10781882	Cln5	CLN5, intracellular trafficking protein	0.164167	6.16299	2.44939	0.0281694	0.71418
10896885	Tg	thyroglobulin	0.104135	4.09052	2.4483	0.0282285	0.71418
10743759	Cfap52	cilia and flagella associated protein 52	-0.179632	5.33426	-2.44717	0.0282898	0.71418
10881326	Pramef12	PRAME family member 12	0.0858478	4.18438	2.44707	0.0282954	0.71418
10747202	Krt33b	keratin 33B	-0.17048	5.14393	-2.44551	0.02838	0.714383
10897465	Cyth4	cytohesin 4	-0.137099	7.06561	-2.44466	0.0284264	0.714383
10714450	Tmem252	transmembrane protein 252	0.112351	4.94151	2.44414	0.0284549	0.714383
10851263	Samhd1	SAM and HD domain containing deoxynucleoside triphosphate triphosphohydrolase 1	-0.139233	5.86724	-2.44361	0.0284839	0.714383
10919926	Gpr62	G protein-coupled receptor 62	0.119617	6.54355	2.44298	0.0285185	0.714383
10759173	Selplg	selectin P ligand	-0.0712218	8.357	-2.44209	0.0285672	0.714525
10755013	Il1rap	interleukin 1 receptor accessory protein	0.128188	8.06232	2.44107	0.0286229	0.714841
10919470	Esyt3	extended synaptotagmin 3	-0.102892	5.58024	-2.43964	0.0287019	0.715738
10717813	Cnksr3	Cnksr family member 3	0.22194	5.43466	2.43805	0.0287896	0.715972
10844074	Cfap77	cilia and flagella associated protein 77	-0.138343	5.57833	-2.43679	0.0288591	0.715972
10706810	Lhb	luteinizing hormone subunit beta	-0.0812414	4.91456	-2.43607	0.0288987	0.715972
10917123	Htr3a	5-hydroxytryptamine receptor 3A	-0.179838	5.6692	-2.43563	0.0289234	0.715972
10921041	Gask1a	golgi associated kinase 1A	-0.0853695	5.34379	-2.43419	0.0290031	0.715972
10898245	Parvg	parvin, gamma	-0.152005	5.62762	-2.43346	0.0290439	0.715972
10873928	Fbxo2	F-box protein 2	0.100574	6.95451	2.43343	0.0290456	0.715972
10916016	St3gal4	ST3 beta-galactoside alpha-2,3-sialyltransferase 4	0.128726	7.67428	2.43313	0.0290624	0.715972
10858133	Marchf8	membrane associated ring-CH-type finger 8	0.123724	7.5215	2.43247	0.0290993	0.715972
10889177	Rhob	ras homolog family member B	0.122153	9.16155	2.43035	0.0292178	0.716974
10751295	Pla1a	phospholipase A1 member A	0.17301	5.01128	2.42944	0.0292689	0.716974
10893067	Stat2	signal transducer and activator of transcription 2	0.184339	7.25313	2.42928	0.0292776	0.716974
10919422	Pxylp1	2-phosphoxylose phosphatase 1	-0.199377	6.13686	-2.42866	0.0293127	0.716974
10923710	Carf	calcium responsive transcription factor	-0.120233	7.47544	-2.4266	0.0294284	0.717433
10710857	Tufm	Tu translation elongation factor, mitochondrial	0.103186	7.59543	2.42358	0.0295995	0.717433
10899278	Slc4a8	solute carrier family 4 member 8	0.121727	7.65035	2.42325	0.0296179	0.717433
10808431	Irf8	interferon regulatory factor 8	-0.101654	4.96363	-2.42322	0.0296194	0.717433
10933231	Wwc3	WWC family member 3	0.118482	6.85664	2.42255	0.0296577	0.717433
10801752	Snx24	sorting nexin 24	0.10569	6.50136	2.42233	0.0296703	0.717433
10777992	Tug1	taurine up-regulated 1	-0.10505	9.80792	-2.42229	0.0296725	0.717433
10896337	Zfpm2	zinc finger protein, multitype 2	0.220516	7.59337	2.42158	0.0297128	0.717433
10774403	Wdpcp	WD repeat containing planar cell polarity effector	0.146193	6.53265	2.42145	0.0297202	0.717433
10792734	Tmem255b	transmembrane protein 255B	-0.0880821	6.67263	-2.42041	0.0297795	0.71782
10813347	Ttc33	tetratricopeptide repeat domain 33	0.108755	8.62512	2.41921	0.0298479	0.718426
10822627	Tmem212	transmembrane protein 212	-0.491335	5.079	-2.41745	0.0299489	0.719814
10754354	Ildr1	immunoglobulin-like domain containing receptor 1	0.102619	5.0025	2.41335	0.0301851	0.72113
10823970	Tlr2	toll-like receptor 2	-0.107041	4.17319	-2.41192	0.0302672	0.72113
10868693	Frmpd1	FERM and PDZ domain containing 1	0.157475	6.25193	2.41091	0.0303263	0.72113
10935613	Zic3	Zic family member 3	-0.208485	6.05822	-2.40982	0.0303892	0.72113
10905793	Poldip3	DNA polymerase delta interacting protein 3	-0.0740065	9.36265	-2.40962	0.0304012	0.72113
10842315	Ncoa3	nuclear receptor coactivator 3	0.110292	7.21358	2.40906	0.0304336	0.72113
10728538	Polr2g	RNA polymerase II subunit G	0.127067	7.38571	2.409	0.0304373	0.72113
10702768	Tiam2	TIAM Rac1 associated GEF 2	0.0937741	8.09784	2.40894	0.0304403	0.72113
10940271	Hcfc1	host cell factor C1	-0.0915734	8.6421	-2.4089	0.030443	0.72113
10810434	Gypa	glycophorin A	-0.320806	4.49153	-2.4075	0.0305247	0.72113
10828407	Mir219a1	microRNA 219a-1	-0.122889	4.59634	-2.40594	0.0306156	0.721721
10781304	Loxl2	lysyl oxidase-like 2	0.126448	4.19039	2.40558	0.0306367	0.721721
10734945	Trappc1	trafficking protein particle complex subunit 1	-0.141762	9.78598	-2.40196	0.03085	0.72174
10703818	Zfp418	zinc finger protein 418	-0.117766	7.6455	-2.4013	0.0308887	0.72174
10853797	Tes	testin LIM domain protein	0.139175	6.93385	2.39989	0.0309722	0.72174
10735699	Trpv3	transient receptor potential cation channel, subfamily V, member 3	0.139887	4.64813	2.39985	0.0309744	0.72174
10764643	Trmt1l	tRNA methyltransferase 1-like	0.100063	7.97685	2.39929	0.0310075	0.72174
10756731	Zdhhc4	zinc finger DHHC-type palmitoyltransferase 4	-0.0838368	7.59803	-2.39578	0.0312162	0.72174
10764369	Atp6v1g3	ATPase H+ transporting V1 subunit G3	0.0978105	4.56828	2.39543	0.0312374	0.72174
10912558	Msl2	MSL complex subunit 2	-0.0900045	8.17323	-2.39409	0.0313173	0.72174
10725908	Pagr1	Paxip1-associated glutamate-rich protein 1	0.111569	6.08921	2.39339	0.0313594	0.72174
10760620	Eif3b	eukaryotic translation initiation factor 3, subunit B	-0.080763	9.11613	-2.3929	0.0313887	0.72174
10761897	Mlxip	MLX interacting protein	0.0850276	7.32829	2.39232	0.0314233	0.72174
10752531	Sdf2l1	stromal cell-derived factor 2-like 1	0.1823	6.16845	2.39166	0.0314633	0.72174
10819961	Rpe65	retinoid isomerohydrolase RPE65	0.206444	4.26785	2.39062	0.0315255	0.72174
10786828	Fam170b	family with sequence similarity 170, member B	0.0984551	5.73809	2.39045	0.0315355	0.72174
10776547	Cwh43	cell wall biogenesis 43 C-terminal homolog	0.132578	4.56735	2.39032	0.0315434	0.72174
10923338	Coq10b	coenzyme Q10B	0.320175	7.09595	2.38944	0.0315967	0.72174
10761311	Tyw1	tRNA-yW synthesizing protein 1 homolog	0.0840033	6.58479	2.38846	0.0316558	0.72174
10794077	Mxd3	Max dimerization protein 3	0.152146	4.37043	2.38807	0.0316795	0.72174
10745185	Sdf2	stromal cell derived factor 2	0.121734	5.37254	2.38776	0.031698	0.72174
10830901	Znrd1as1	ZNRD1 antisense RNA 1	-0.448728	5.2867	-2.38726	0.0317282	0.72174
10861745	Cyren	cell cycle regulator of NHEJ	0.119532	5.88986	2.38669	0.0317632	0.72174
10814833	Fxr1	FMR1 autosomal homolog 1	0.113517	8.68367	2.38652	0.0317733	0.72174
10759752	Rfc3	replication factor C subunit 3	0.103894	4.86919	2.38602	0.0318035	0.72174
10786028	Gpr183	G protein-coupled receptor 183	0.152527	5.49998	2.38592	0.0318098	0.72174
10735434	LOC100912483	uncharacterized LOC100912483	-0.149824	5.32517	-2.38583	0.0318155	0.72174
10742977	Zfp39	zinc finger protein 39	-0.172652	7.33543	-2.38531	0.0318466	0.72174
10704784	Mir330	microRNA 330	0.105976	5.56623	2.38519	0.0318543	0.72174
10755644	Scarf2	scavenger receptor class F, member 2	0.124184	5.47811	2.38403	0.0319249	0.722356
10892339	Cdca4	cell division cycle associated 4	0.0965152	4.9371	2.38173	0.0320652	0.722777
10756597	Tmem130	transmembrane protein 130	-0.0824988	10.6681	-2.38075	0.0321253	0.722777
10803001	Zfp516	zinc finger protein 516	0.0929165	5.15703	2.38016	0.0321614	0.722777
10708544	Me3	malic enzyme 3	-0.207092	8.10017	-2.37975	0.0321868	0.722777
10919574	Ppp2r3a	protein phosphatase 2, regulatory subunit B'', alpha	0.114805	6.2632	2.37893	0.0322372	0.722777
10931308	P4ha1	prolyl 4-hydroxylase subunit alpha 1	0.141155	8.51654	2.37875	0.0322482	0.722777
10776026	Dck	deoxycytidine kinase	0.175494	9.05085	2.37688	0.0323635	0.723278
10766882	Mir29c	microRNA 29c	0.203562	4.99547	2.37658	0.0323817	0.723278
10791474	Mfap3l	microfibril associated protein 3 like	0.116091	9.43354	2.37627	0.0324012	0.723278
10939093	Rps6ka6	ribosomal protein S6 kinase A6	-0.202142	4.38998	-2.37462	0.0325031	0.723519
10922783	Map4k4	mitogen-activated protein kinase kinase kinase kinase 4	0.11168	7.90227	2.37447	0.0325124	0.723519
10763531	Tfcp2l1	transcription factor CP2-like 1	0.161523	5.40598	2.37398	0.0325427	0.723519
10783145	Klhl33	kelch-like family member 33	0.108746	4.96304	2.37269	0.032623	0.724335
10886838	Mir127	microRNA 127	0.0913299	4.66594	2.37113	0.0327202	0.725524
10853137	Fbxl13	F-box and leucine-rich repeat protein 13	-0.354955	5.0686	-2.36952	0.0328207	0.726397
10770594	Spata17	spermatogenesis associated 17	-0.142238	4.00315	-2.36864	0.032876	0.726397
10884048	Tmem18	transmembrane protein 18	-0.1304	7.71162	-2.36823	0.0329014	0.726397
10781426	Rcbtb2	RCC1 and BTB domain containing protein 2	-0.0923078	6.7616	-2.3677	0.0329345	0.726397
10722987	Snrpe	small nuclear ribonucleoprotein polypeptide E	0.130138	7.7494	2.36559	0.0330672	0.727764
10824821	Riiad1	regulatory subunit of type II PKA R-subunit domain containing 1	-0.108599	6.97068	-2.36533	0.0330842	0.727764
10741334	Telo2	telomere maintenance 2	0.0904666	6.42762	2.36109	0.0333521	0.727978
10940447	Krt7	keratin 7	-0.126693	5.1261	-2.361	0.0333577	0.727978
10832487	Derl3	derlin 3	0.193265	4.75893	2.35975	0.0334375	0.727978
10939460	Rab9b	RAB9B, member RAS oncogene family	-0.143677	10.2447	-2.35822	0.0335347	0.727978
10729752	Rnls	renalase, FAD-dependent amine oxidase	-0.160307	6.0284	-2.3568	0.0336259	0.727978
10757100	Cox19	cytochrome c oxidase assembly factor COX19	-0.11825	5.81465	-2.3567	0.0336323	0.727978
10714103	Mpeg1	macrophage expressed 1	0.200652	6.29455	2.3562	0.0336645	0.727978
10913003	Hyal2	hyaluronidase 2	0.107338	6.58505	2.35589	0.0336839	0.727978
10895247	Rassf9	Ras association domain family member 9	-0.108578	4.33665	-2.35518	0.0337298	0.727978
10722903	Mfge8	milk fat globule EGF and factor V/VIII domain containing	-0.133787	9.27263	-2.35513	0.0337331	0.727978
10901735	Slc17a8	solute carrier family 17 member 8	-0.176495	4.73487	-2.35502	0.0337401	0.727978
10858871	Scnn1a	sodium channel epithelial 1 subunit alpha	0.126664	4.09423	2.35437	0.0337817	0.727978
10766161	Itpkb	inositol-trisphosphate 3-kinase B	-0.150479	7.00933	-2.35315	0.0338603	0.727978
10804821	Piezo2	piezo-type mechanosensitive ion channel component 2	-0.0832524	4.02971	-2.35262	0.0338942	0.727978
10852799	Prkag2	protein kinase AMP-activated non-catalytic subunit gamma 2	0.134885	8.94043	2.3526	0.0338959	0.727978
10897285	Scx	scleraxis bHLH transcription factor	0.0914074	5.10213	2.35232	0.033914	0.727978
10912444	Rbp2	retinol binding protein 2	-0.0953966	4.10152	-2.35212	0.0339269	0.727978
10722566	Mphosph10	M-phase phosphoprotein 10	0.101992	6.18659	2.35099	0.0339997	0.727978
10823432	Plch1	phospholipase C, eta 1	-0.19264	4.99518	-2.35044	0.0340354	0.727978
10801975	MGC108823	similar to interferon-inducible GTPase	-0.278739	4.00501	-2.35013	0.0340553	0.727978
10706941	Ca11	carbonic anhydrase 11	-0.107511	9.0349	-2.34884	0.034139	0.727978
10859547	Iapp	islet amyloid polypeptide	-0.0956701	4.06211	-2.34629	0.034305	0.727978
10827686	RT1-M6-1	RT1 class I, locus M6, gene 1	0.272298	6.37819	2.34628	0.0343057	0.727978
10856601	Ccdc142	coiled-coil domain containing 142	-0.115419	6.96158	-2.34583	0.0343349	0.727978
10863733	Snrnp27	small nuclear ribonucleoprotein U4/U6.U5 subunit 27	0.0812996	8.29064	2.3457	0.0343436	0.727978
10777204	Med28	mediator complex subunit 28	-0.0973055	9.00986	-2.34567	0.0343458	0.727978
10756515	Gpr12	G protein-coupled receptor 12	-0.154961	7.71855	-2.34561	0.0343492	0.727978
10887481	LOC691485	hypothetical protein LOC691485	0.131992	6.16665	2.34524	0.0343734	0.727978
10871511	Lao1	L-amino acid oxidase 1	0.0770467	4.07891	2.34438	0.0344299	0.727978
10853152	Ccdc146	coiled-coil domain containing 146	-0.0941004	4.20784	-2.34274	0.0345376	0.727978
10788728	Brf2	BRF2, RNA polymerase III transcription initiation factor subunit	0.0973853	4.94041	2.34229	0.0345671	0.727978
10868923	Tgfbr1	transforming growth factor, beta receptor 1	-0.10841	7.12656	-2.34113	0.0346433	0.727978
10776512	Rasl11b	RAS-like family 11 member B	0.168194	8.73043	2.3409	0.0346585	0.727978
10906525	Pus7l	pseudouridine synthase 7 like	-0.16087	5.33124	-2.34076	0.0346678	0.727978
10783607	Cdh24	cadherin 24	0.0993411	6.72665	2.3407	0.0346719	0.727978
10747836	Slc25a39	solute carrier family 25, member 39	-0.135373	7.71079	-2.33989	0.034725	0.728174
10778661	Mdh1	malate dehydrogenase 1	0.0901665	10.9382	2.33899	0.0347842	0.728494
10853669	Dlx6	distal-less homeobox 6	-0.323965	6.086	-2.33806	0.034846	0.728869
10735240	Gltpd2	glycolipid transfer protein domain containing 2	0.0939706	4.71349	2.33665	0.0349398	0.729075
10740191	Npb	neuropeptide B	-0.134342	5.07689	-2.33646	0.0349524	0.729075
10759177	Tmem119	transmembrane protein 119	0.118914	7.68645	2.33593	0.0349875	0.729075
10744119	Mpdu1	mannose-P-dolichol utilization defect 1	-0.0863384	9.27571	-2.33497	0.0350513	0.729488
10841946	Sgk2	serum/glucocorticoid regulated kinase 2	0.105284	4.53279	2.33289	0.0351901	0.731218
10704573	Pnma8a	PNMA family member 8A	0.132731	7.74508	2.3324	0.0352225	0.731218
10913201	Mir191	microRNA 191	0.0806306	6.11311	2.33081	0.0353292	0.732313
10832496	Susd2	sushi domain containing 2	0.126931	6.74592	2.33004	0.035381	0.732313
10813646	Agxt2	alanine-glyoxylate aminotransferase 2	-0.0884398	4.03	-2.32964	0.0354075	0.732313
10818590	Extl2	exostosin-like glycosyltransferase 2	0.120255	8.95254	2.32712	0.0355778	0.73492
10766718	Batf3	basic leucine zipper ATF-like transcription factor 3	-0.0818939	5.83732	-2.32512	0.0357127	0.735744
10900747	Prtn3	proteinase 3	0.103794	4.74253	2.32461	0.0357473	0.735744
10769971	Atp1a4	ATPase Na+/K+ transporting subunit alpha 4	-0.0777437	4.26536	-2.32456	0.0357506	0.735744
10931303	Pla2g12b	phospholipase A2, group XIIB	0.117595	4.74877	2.32373	0.0358071	0.735995
10938952	Taf9b	TATA-box binding protein associated factor 9b	-0.263892	8.92955	-2.3211	0.0359866	0.738244
10906963	Prkag1	protein kinase AMP-activated non-catalytic subunit gamma 1	0.0810331	9.07933	2.31945	0.0360989	0.738244
10750731	Nit2	nitrilase family, member 2	-0.276165	7.56217	-2.3191	0.0361231	0.738244
10885153	Lrrc9	leucine rich repeat containing 9	-0.21254	4.39417	-2.31903	0.0361276	0.738244
10907458	Krt2	keratin 2	0.132895	4.31866	2.31887	0.0361388	0.738244
10861410	Pax4	paired box 4	-0.081276	4.70758	-2.3179	0.0362054	0.738426
10868729	RGD1305807	hypothetical LOC298077	0.0778845	4.13272	2.31745	0.0362366	0.738426
10909382	Vof16	ischemia related factor vof-16	-0.106288	9.16099	-2.3152	0.0363911	0.739854
10709687	Olfml1	olfactomedin-like 1	0.163953	7.65316	2.31454	0.0364371	0.739854
10940668	Gipc2	GIPC PDZ domain containing family, member 2	-0.106636	4.44067	-2.31379	0.0364889	0.739854
10818656	Mir137	microRNA 137	-0.113834	4.18531	-2.31377	0.0364898	0.739854
10870739	Czib	CXXC motif containing zinc binding protein	-0.108512	8.13784	-2.3132	0.0365294	0.739854
10798702	Inhba	inhibin subunit beta A	-0.185352	7.5742	-2.31124	0.0366657	0.740566
10743608	Zfp286a	zinc finger protein 286A	-0.146282	6.22906	-2.30984	0.0367628	0.740566
10744589	Derl2	derlin 2	0.147153	6.76471	2.30981	0.0367651	0.740566
10777350	Cytl1	cytokine like 1	0.142717	4.66061	2.30971	0.036772	0.740566
10871857	Mtf1	metal-regulatory transcription factor 1	0.0957105	7.84686	2.30768	0.0369133	0.740566
10724838	Tmem41b	transmembrane protein 41B	0.106262	8.99216	2.30744	0.0369306	0.740566
10927780	Slc40a1	solute carrier family 40 member 1	-0.177053	6.5214	-2.30743	0.0369312	0.740566
10850762	Rbck1	RANBP2-type and C3HC4-type zinc finger containing 1	-0.0667642	8.08555	-2.30733	0.036938	0.740566
10912218	Plscr1	phospholipid scramblase 1	-0.0904315	4.0106	-2.30609	0.037025	0.740566
10907992	Ccdc82	coiled-coil domain containing 82	-0.117148	6.84584	-2.30595	0.0370345	0.740566
10842151	Wfdc6b	WAP four-disulfide core domain 6B	-0.112793	4.21546	-2.30516	0.0370899	0.740566
10767175	Insig2	insulin induced gene 2	0.11259	7.9721	2.30503	0.0370996	0.740566
10931176	Zfp182	zinc finger protein 182	-0.120796	7.38746	-2.30425	0.0371539	0.740759
10746139	Scpep1	serine carboxypeptidase 1	0.123253	7.85229	2.30326	0.0372242	0.74127
10932037	Akap17b	A kinase (PRKA) anchor protein 17B	-0.113729	6.0946	-2.29853	0.0375587	0.745892
10728030	Frmd8	FERM domain containing 8	0.0893367	6.49716	2.29746	0.0376348	0.745892
10830073	Neurog3	neurogenin 3	-0.0922538	4.27622	-2.29693	0.0376729	0.745892
10766926	Pign	phosphatidylinositol glycan anchor biosynthesis, class N	0.199007	5.80443	2.29527	0.0377914	0.745892
10828756	Lhfpl5	LHFPL tetraspan subfamily member 5	0.15414	6.90664	2.29514	0.0378004	0.745892
10900873	Slc1a6	solute carrier family 1 member 6	0.0940655	4.7088	2.29272	0.0379738	0.745892
10779270	Cd99l2	CD99 molecule-like 2	-0.107345	9.51062	-2.29219	0.0380115	0.745892
10800667	Polr2d	RNA polymerase II subunit D	-0.0779959	6.52929	-2.29192	0.0380315	0.745892
10850783	Nrsn2	neurensin 2	-0.2055	9.13287	-2.29189	0.0380337	0.745892
10814687	Lrrc34	leucine rich repeat containing 34	-0.292162	4.29786	-2.29151	0.038061	0.745892
10833104	Col13a1	collagen type XIII alpha 1 chain	0.10863	4.92954	2.29134	0.0380727	0.745892
10745292	Lgals9	galectin 9	-0.141488	7.23722	-2.2908	0.038112	0.745892
10729610	Ermp1	endoplasmic reticulum metallopeptidase 1	0.0844977	7.35766	2.29055	0.03813	0.745892
10798150	Wrnip1	WRN helicase interacting protein 1	0.101858	6.48051	2.28839	0.0382857	0.747139
10881474	LOC120093167	zinc finger protein 664-like	0.140625	6.81365	2.28818	0.0383015	0.747139
10934569	Fgf16	fibroblast growth factor 16	-0.181997	4.22644	-2.2878	0.0383287	0.747139
10808325	Dnaaf1	dynein, axonemal, assembly factor 1	-0.136681	4.51572	-2.28646	0.0384261	0.747335
10934103	Pgr15l	G protein-coupled receptor 15-like	-0.142466	4.23137	-2.28636	0.0384329	0.747335
10879427	Nfyc	nuclear transcription factor Y subunit gamma	-0.0875678	8.65282	-2.2858	0.0384737	0.747335
10940663	Eng	endoglin	-0.137501	7.60349	-2.28311	0.0386701	0.747919
10909918	Ppp2r1b	protein phosphatase 2 scaffold subunit A beta	0.131694	7.61483	2.2805	0.0388608	0.747919
10812387	Edil3	EGF like repeats and discoidin domains 3	0.14254	9.18132	2.2799	0.0389051	0.747919
10865964	LOC689770	similar to osteoclast inhibitory lectin	0.177731	4.06933	2.2796	0.0389275	0.747919
10851492	Oser1	oxidative stress responsive serine-rich 1	0.131983	6.3053	2.27898	0.0389729	0.747919
10729252	Ostf1	osteoclast stimulating factor 1	0.126178	7.97913	2.27897	0.0389737	0.747919
10721634	Prrg2	proline rich and Gla domain 2	-0.0944182	4.20653	-2.2783	0.0390228	0.747919
10824814	Oaz3	ornithine decarboxylase antizyme 3	0.0796182	4.459	2.27811	0.0390371	0.747919
10910641	Tle3	TLE family member 3, transcriptional corepressor	0.147641	7.94774	2.27803	0.0390428	0.747919
10784221	RGD1563302	RGD1563302	0.0626559	4.14554	2.2776	0.0390743	0.747919
10800098	Thoc1	THO complex 1	-0.0707434	6.99637	-2.27665	0.0391446	0.747919
10801650	Tnfaip8	TNF alpha induced protein 8	0.0862734	6.27517	2.27588	0.0392019	0.747919
10820277	Cox7c	cytochrome c oxidase subunit 7C	0.115935	10.6002	2.2757	0.0392149	0.747919
10787031	Grid1	glutamate ionotropic receptor delta type subunit 1	-0.107384	7.09005	-2.27467	0.0392914	0.747919
10762981	Rpa3	replication protein A3	-0.141926	5.14759	-2.27457	0.0392989	0.747919
10865243	Mical3	microtubule associated monooxygenase, calponin and LIM domain containing 3	0.0948846	7.19101	2.27446	0.0393071	0.747919
10774438	Zrsr1	zinc finger (CCCH type), RNA binding motif and serine/arginine rich 1	-0.123525	8.15819	-2.27332	0.0393915	0.747919
10915555	S1pr5	sphingosine-1-phosphate receptor 5	0.213977	8.14918	2.27269	0.0394383	0.747919
10782199	Lrmda	leucine rich melanocyte differentiation associated	0.0784052	4.50574	2.27226	0.0394701	0.747919
10724404	Olr156	olfactory receptor 156	0.105415	4.75201	2.27149	0.0395278	0.747919
10702361	Hey2	hes-related family bHLH transcription factor with YRPW motif 2	-0.235688	6.61188	-2.27133	0.0395395	0.747919
10753582	Dcbld2	discoidin, CUB and LCCL domain containing 2	-0.0838292	8.19797	-2.27058	0.0395955	0.748044
10868552	Npr2	natriuretic peptide receptor 2	-0.112449	6.68467	-2.27004	0.0396362	0.748044
10895152	Kitlg	KIT ligand	0.149507	6.3708	2.26899	0.0397149	0.748677
10803999	Dnd1	DND microRNA-mediated repression inhibitor 1	0.163107	5.2654	2.26725	0.0398449	0.750278
10849655	Kcnip3	potassium voltage-gated channel interacting protein 3	-0.102675	10.7049	-2.26588	0.0399483	0.751371
10849841	Il1b	interleukin 1 beta	-0.0808134	4.24679	-2.26487	0.0400245	0.751953
10940250	Naa10	N(alpha)-acetyltransferase 10, NatA catalytic subunit	-0.0642989	7.51766	-2.26397	0.0400925	0.75238
10785531	Klhl1	kelch-like family member 1	-0.13381	4.7553	-2.26274	0.0401852	0.752754
10797918	Pak1ip1	PAK1 interacting protein 1	-0.127777	7.16775	-2.26241	0.0402109	0.752754
10795679	Gpr137b	G protein-coupled receptor 137B	0.103189	7.30324	2.26187	0.0402514	0.752754
10795295	hist1h2ail2	histone cluster 1, H2ai-like2	-0.154351	5.82665	-2.26131	0.0402937	0.752754
10914424	Hhatl	hedgehog acyltransferase-like	0.147767	5.76447	2.25633	0.0406736	0.757297
10824763	LOC102551936	late cornified envelope protein 1C-like	0.139497	6.06548	2.25598	0.0407008	0.757297
10751108	Gtpbp8	GTP-binding protein 8 (putative)	-0.105477	6.24323	-2.25587	0.0407095	0.757297
10896086	Pop1	POP1 homolog, ribonuclease P/MRP subunit	0.0907891	4.75269	2.25497	0.0407783	0.757297
10739667	Myo15b	myosin XVB	0.0822705	4.97634	2.25493	0.0407809	0.757297
10886652	Ak7	adenylate kinase 7	-0.205907	4.34716	-2.25441	0.040821	0.757297
10752081	Ehhadh	enoyl-CoA hydratase and 3-hydroxyacyl CoA dehydrogenase	0.151448	4.68737	2.25167	0.0410321	0.757297
10706503	Klk1b3	kallikrein 1-related peptidase B3	-0.0988892	4.38688	-2.25037	0.0411328	0.757297
10807828	Zfp612	zinc finger protein 612	-0.120615	7.83755	-2.25032	0.0411369	0.757297
10840684	Entpd6	ectonucleoside triphosphate diphosphohydrolase 6	-0.106467	8.63565	-2.25003	0.0411596	0.757297
10908169	Olr1142	olfactory receptor 1142	0.077651	4.79595	2.24978	0.0411783	0.757297
10869925	Ift74	intraflagellar transport 74	-0.120478	6.56708	-2.24922	0.0412224	0.757297
10711053	Fbrs	fibrosin	-0.0981046	7.00298	-2.2487	0.0412622	0.757297
10770996	Atp5me	ATP synthase membrane subunit e	0.164319	6.32574	2.24837	0.0412883	0.757297
10840962	Ccm2l	CCM2 like scaffold protein	-0.106738	5.59407	-2.24811	0.0413082	0.757297
10882234	Cptp	ceramide-1-phosphate transfer protein	0.170197	7.6559	2.2473	0.0413716	0.757297
10853469	Fzd1	frizzled class receptor 1	0.100256	4.81666	2.24715	0.0413832	0.757297
10865163	Wnk1	WNK lysine deficient protein kinase 1	-0.1502	6.50208	-2.24702	0.0413928	0.757297
10711743	Edrf1	erythroid differentiation regulatory factor 1	0.101033	6.82507	2.24689	0.0414033	0.757297
10792163	Eif4ebp1	eukaryotic translation initiation factor 4E binding protein 1	0.117198	7.14202	2.24514	0.0415398	0.758725
10889263	Trib2	tribbles pseudokinase 2	-0.0929741	7.381	-2.24472	0.0415727	0.758725
10764827	Tor1aip2	torsin 1A interacting protein 2	0.141549	6.04832	2.2436	0.0416601	0.759484
10893849	Uqcr11	ubiquinol-cytochrome c reductase, complex III subunit XI	-0.0873978	11.1278	-2.24277	0.0417255	0.759843
10862398	Zfp467	zinc finger protein 467	-0.0960699	5.6601	-2.24156	0.0418203	0.760091
10724950	Galnt18	polypeptide N-acetylgalactosaminyltransferase 18	0.0804969	6.68071	2.24143	0.0418307	0.760091
10940470	Cyp3a62	cytochrome P450, family 3, subfamily a, polypeptide 62	-0.134329	4.46082	-2.24042	0.0419098	0.760257
10728853	Ms4a8	membrane spanning 4-domains A8	0.0952758	4.94358	2.23981	0.0419581	0.760257
10919354	Pls1	plastin 1	0.239434	7.26473	2.23957	0.0419771	0.760257
10798471	Taf5l	TATA-box binding protein associated factor 5 like	-0.0962579	6.82143	-2.23577	0.0422784	0.763495
10825495	Slc22a15	solute carrier family 22, member 15	0.146314	6.26089	2.23558	0.0422935	0.763495
10843475	C8g	complement C8 gamma chain	-0.129116	7.48881	-2.23324	0.0424799	0.763495
10751167	Gramd1c	GRAM domain containing 1C	-0.0696654	5.12652	-2.23284	0.0425116	0.763495
10904189	St3gal1	ST3 beta-galactoside alpha-2,3-sialyltransferase 1	-0.118344	7.62232	-2.23267	0.0425252	0.763495
10828827	Cdkn1a	cyclin-dependent kinase inhibitor 1A	0.21007	6.97618	2.23261	0.0425298	0.763495
10925660	Ing5	inhibitor of growth family, member 5	-0.102526	7.13149	-2.23248	0.0425403	0.763495
10839314	Bloc1s6	biogenesis of lysosomal organelles complex 1 subunit 6	-0.122534	6.16759	-2.23229	0.0425558	0.763495
10822481	Gyg1	glycogenin 1	0.0977559	8.35273	2.23165	0.0426066	0.763495
10849018	Lcmt2	leucine carboxyl methyltransferase 2	-0.172625	5.90121	-2.23139	0.0426272	0.763495
10881521	Plod1	procollagen-lysine, 2-oxoglutarate 5-dioxygenase 1	0.107693	7.24308	2.22979	0.0427561	0.763495
10857412	Slc25a26	solute carrier family 25 member 26	0.0997543	7.69364	2.22962	0.0427696	0.763495
10789975	Itih1	inter-alpha trypsin inhibitor, heavy chain 1	0.0805743	4.8684	2.2295	0.0427789	0.763495
10717909	Rsph3	radial spoke head 3	-0.134861	5.99451	-2.22917	0.0428058	0.763495
10722193	Ptpn5	protein tyrosine phosphatase, non-receptor type 5	-0.241261	9.17155	-2.22867	0.0428455	0.763495
10868632	Ccin	calicin	0.093036	4.37382	2.22722	0.042963	0.763748
10884553	Ap4s1	adaptor related protein complex 4 subunit sigma 1	-0.131041	7.45693	-2.22679	0.0429976	0.763748
10704979	Xrcc1	X-ray repair cross complementing 1	-0.10185	7.37388	-2.2234	0.0432716	0.764981
10861908	Svopl	SVOP like	0.0771744	5.19557	2.2228	0.0433208	0.764981
10739455	Gprc5c	G protein-coupled receptor, class C, group 5, member C	0.140959	4.46275	2.22263	0.0433344	0.764981
10879785	Tekt2	tektin 2	-0.138217	4.98981	-2.22224	0.0433662	0.764981
10739933	Engase	endo-beta-N-acetylglucosaminidase	0.0805691	5.31215	2.22221	0.0433689	0.764981
10871203	Pomgnt1	protein O-linked mannose N-acetylglucosaminyltransferase 1 (beta 1,2-)	-0.09336	8.0103	-2.22183	0.0433998	0.764981
10929842	Per2	period circadian regulator 2	0.15442	7.3848	2.22168	0.0434114	0.764981
10819489	Gbp5	guanylate binding protein 5	-0.132465	5.15608	-2.221	0.0434674	0.764981
10736257	Traf4	Tnf receptor associated factor 4	-0.101624	6.41398	-2.22049	0.0435083	0.764981
10834300	Fbxw5	F-box and WD repeat domain containing 5	-0.0725488	8.24318	-2.22026	0.0435277	0.764981
10862567	Hoxa7	homeobox A7	-0.0942835	5.00908	-2.21952	0.0435878	0.765228
10790362	Wdfy4	WDFY family member 4	0.0991114	4.68845	2.21743	0.0437595	0.76658
10772534	Gabra2	gamma-aminobutyric acid type A receptor subunit alpha 2	-0.0828542	9.74997	-2.21712	0.0437845	0.76658
10924717	Rhbdd1	rhomboid domain containing 1	-0.106563	5.17461	-2.2168	0.0438112	0.76658
10906142	Mapk12	mitogen-activated protein kinase 12	-0.0946967	5.63147	-2.21615	0.043864	0.76658
10810509	Ttc29	tetratricopeptide repeat domain 29	-0.0732771	4.17007	-2.21325	0.0441038	0.76658
10918820	Rpl32	ribosomal protein L32	-0.415933	10.5639	-2.21283	0.0441379	0.76658
10764891	Sec16b	SEC16 homolog B, endoplasmic reticulum export factor	-0.125672	4.4292	-2.21277	0.0441427	0.76658
10880727	C1qb	complement C1q B chain	0.150235	7.57461	2.21263	0.0441546	0.76658
10856415	Capg	capping actin protein, gelsolin like	0.0846942	5.11995	2.21244	0.0441701	0.76658
10781197	Stmn4	stathmin 4	0.116958	8.87757	2.21115	0.0442773	0.76658
10931288	Pot1b	protection of telomeres 1B	-0.104002	5.49189	-2.20964	0.0444028	0.76658
10867022	Lmod2	leiomodin 2	0.0900315	4.31209	2.20918	0.0444408	0.76658
10744700	Tekt1	tektin 1	-0.236668	4.28122	-2.20887	0.044467	0.76658
10891026	Zfyve1	zinc finger FYVE-type containing 1	0.0825703	7.27909	2.20842	0.044504	0.76658
10935882	Zfp275	zinc finger protein 275	-0.126455	6.36546	-2.20766	0.0445681	0.76658
10910089	Crabp1	cellular retinoic acid binding protein 1	-0.265871	7.18732	-2.2066	0.0446561	0.76658
10871464	Hyi	hydroxypyruvate isomerase	0.118056	5.36465	2.20635	0.0446773	0.76658
10913153	Amigo3	adhesion molecule with Ig like domain 3	0.0933434	5.74957	2.20591	0.0447143	0.76658
10901524	Stab2	stabilin 2	0.0739553	4.05679	2.20288	0.0449687	0.76658
10760189	Bud31	BUD31 homolog	0.109011	8.93423	2.20229	0.0450182	0.76658
10755992	Cdc45	cell division cycle 45	0.121744	4.84574	2.20172	0.0450659	0.76658
10753720	Zbtb11	zinc finger and BTB domain containing 11	0.10909	7.62018	2.20046	0.045173	0.76658
10827691	RT1-M6-2	RT1 class I, locus M6, gene 2	0.436761	5.53592	2.20014	0.0451993	0.76658
10827240	Dnai3	dynein axonemal intermediate chain 3	-0.435326	5.04395	-2.19967	0.0452394	0.76658
10773695	Pik3ip1	phosphoinositide-3-kinase interacting protein 1	0.108047	7.34661	2.1992	0.0452792	0.76658
10726691	Sigirr	single Ig and TIR domain containing	-0.126165	4.40907	-2.19882	0.0453118	0.76658
10713050	Fibp	FGF1 intracellular binding protein	-0.115774	8.19462	-2.19877	0.0453159	0.76658
10938579	Rpl27	ribosomal protein L27	0.0651187	6.55714	2.19866	0.0453249	0.76658
10713796	Ahnak	AHNAK nucleoprotein	0.108661	5.64671	2.19761	0.0454145	0.76658
10893906	Cbarp	CACN subunit beta associated regulatory protein	-0.0769654	8.40776	-2.19674	0.0454882	0.76658
10801180	Pcdhb8	protocadherin beta 8	0.25373	7.16888	2.19666	0.0454949	0.76658
10724228	Bcl2l1	Bcl2-like 1	0.0919453	8.51322	2.19655	0.0455039	0.76658
10915648	Rab3d	RAB3D, member RAS oncogene family	-0.0990302	7.03731	-2.19614	0.0455394	0.76658
10765111	Mir214	microRNA 214	0.0979191	6.64276	2.19532	0.0456091	0.76658
10770434	Fbxo28	F-box protein 28	0.0971649	8.10742	2.19467	0.0456645	0.76658
10925466	Olr1353	olfactory receptor 1353	0.0923824	4.61239	2.19454	0.0456758	0.76658
10844273	NEWGENE_735020	pyroglutamylated RFamide peptide	0.163256	6.45678	2.1945	0.0456793	0.76658
10765051	Slc9c2	solute carrier family 9, member C2 (putative)	-0.10602	9.3741	-2.19425	0.0457005	0.76658
10709691	Ppfibp2	PPFIA binding protein 2	-0.154346	5.93753	-2.19312	0.045797	0.76658
10925264	Sh3bp4	SH3-domain binding protein 4	-0.118904	7.30113	-2.1927	0.0458331	0.76658
10939164	Mir361	microRNA 361	-0.133275	4.31673	-2.19268	0.0458351	0.76658
10930058	Stk25	serine/threonine kinase 25	-0.0715163	10.1397	-2.19225	0.0458721	0.76658
10768819	Mr1	major histocompatibility complex, class I-related	-0.224903	4.78136	-2.19134	0.04595	0.76658
10852588	Samd10	sterile alpha motif domain containing 10	0.0939859	6.6441	2.19081	0.0459956	0.76658
10716250	Nhlrc2	NHL repeat containing 2	0.162922	6.83204	2.19025	0.0460431	0.76658
10891402	Dio2	iodothyronine deiodinase 2	0.32632	6.38614	2.19024	0.0460447	0.76658
10857826	Creld1	cysteine-rich with EGF-like domains 1	0.0847344	6.93519	2.19005	0.0460605	0.76658
10783863	Nedd8	NEDD8 ubiquitin like modifier	0.0869942	8.3164	2.18999	0.0460663	0.76658
10886573	Ifi27	interferon, alpha-inducible protein 27	-0.380579	6.87356	-2.18887	0.046162	0.76658
10816725	Thbs3	thrombospondin 3	0.0881532	4.74805	2.18817	0.0462225	0.76658
10757715	Cldn4	claudin 4	-0.135739	4.71338	-2.18717	0.0463089	0.76658
10783818	Ipo4	importin 4	-0.0994741	7.15684	-2.18638	0.0463774	0.76658
10772953	Ccdc149	coiled-coil domain containing 149	-0.0863915	7.18133	-2.18584	0.0464241	0.76658
10857950	Atg7	autophagy related 7	0.124159	7.2461	2.18483	0.0465122	0.76658
10707651	Magel2	MAGE family member L2	-0.164722	4.54855	-2.184	0.0465841	0.76658
10895366	Osbpl8	oxysterol binding protein-like 8	-0.0958502	8.42955	-2.18389	0.046594	0.76658
10718001	Agpat4	1-acylglycerol-3-phosphate O-acyltransferase 4	0.130591	8.51278	2.18342	0.0466345	0.76658
10761341	Rabgef1	RAB guanine nucleotide exchange factor 1	0.0695765	7.97762	2.18335	0.0466408	0.76658
10821105	Mast4	microtubule associated serine/threonine kinase family member 4	0.150631	7.27751	2.18334	0.0466415	0.76658
10760072	Lnx2	ligand of numb-protein X 2	0.107177	6.31012	2.18208	0.0467519	0.76658
10868509	Ccdc107	coiled-coil domain containing 107	-0.0926571	8.70327	-2.18193	0.0467644	0.76658
10739302	Axin2	axin 2	-0.0947195	6.37697	-2.18179	0.0467773	0.76658
10747192	Krtap17-1	keratin associated protein 17-1	0.131659	5.83418	2.18176	0.0467798	0.76658
10779368	Thoc7	THO complex 7	0.147428	6.62751	2.18151	0.0468012	0.76658
10747564	Retreg3	reticulophagy regulator family member 3	0.0858514	8.35117	2.18141	0.0468104	0.76658
10774440	Cct4	chaperonin containing TCP1 subunit 4	0.0915292	8.44178	2.18091	0.0468537	0.76658
10815888	Smc4	structural maintenance of chromosomes 4	-0.125236	5.94209	-2.18064	0.0468776	0.76658
10768857	Qsox1	quiescin sulfhydryl oxidase 1	0.089516	6.56938	2.18058	0.0468826	0.76658
10895508	Ptprr	protein tyrosine phosphatase, receptor type, R	-0.102627	6.83722	-2.17994	0.0469391	0.76658
10880429	Cd52	CD52 molecule	-0.0764874	4.27964	-2.1799	0.0469419	0.76658
10783253	Supt16h	SPT16 homolog, facilitates chromatin remodeling subunit	-0.0681872	8.33288	-2.1788	0.047039	0.76741
10808741	Gas8	growth arrest specific 8	-0.100559	7.05094	-2.17703	0.0471949	0.769197
10740221	Hexd	hexosaminidase D	-0.11384	6.02826	-2.17597	0.0472878	0.769504
10804562	Smim3	small integral membrane protein 3	0.107456	4.90994	2.17541	0.0473371	0.769504
10925055	Neu2	neuraminidase 2	-0.110487	5.64081	-2.17524	0.0473526	0.769504
10869288	Snx30	sorting nexin family member 30	0.0791181	7.51121	2.17403	0.0474597	0.769657
10765413	Rxrg	retinoid X receptor gamma	-0.356579	6.50343	-2.17269	0.0475779	0.769657
10730475	Kcnip2	potassium voltage-gated channel interacting protein 2	-0.202072	7.67166	-2.17268	0.0475787	0.769657
10804179	Plac8l1	PLAC8-like 1	0.130885	5.42589	2.17151	0.0476825	0.769657
10823742	Golim4	golgi integral membrane protein 4	-0.110075	6.876	-2.1712	0.0477103	0.769657
10831041	Mdc1	mediator of DNA damage checkpoint 1	0.0912512	5.29327	2.17105	0.0477239	0.769657
10834670	Adamtsl2	ADAMTS-like 2	-0.0813388	5.78272	-2.17076	0.0477495	0.769657
10828815	Kctd20	potassium channel tetramerization domain containing 20	0.0997045	6.31183	2.17053	0.0477698	0.769657
10803315	Chst9	carbohydrate sulfotransferase 9	0.0933695	4.82189	2.17023	0.0477971	0.769657
10918345	Usp3	ubiquitin specific peptidase 3	-0.159619	5.72727	-2.16991	0.0478255	0.769657
10849635	Ciao1	cytosolic iron-sulfur assembly component 1	0.107395	7.77377	2.16935	0.0478752	0.769712
10903573	Sybu	syntabulin	0.081623	7.9105	2.16827	0.0479721	0.769876
10874126	Slc2a5	solute carrier family 2 member 5	-0.167782	6.12087	-2.16751	0.0480402	0.769876
10762007	Rpl21	ribosomal protein L21	-0.0658835	10.0359	-2.16733	0.0480561	0.769876
10817276	Pogz	pogo transposable element derived with ZNF domain	-0.0739724	8.17961	-2.16692	0.0480928	0.769876
10726989	Prr33	proline rich 33	0.116113	4.42065	2.16665	0.0481172	0.769876
10757606	Styxl1	serine/threonine/tyrosine interacting-like 1	-0.140181	5.14832	-2.16449	0.0483113	0.770118
10830478	Mettl24	methyltransferase like 24	-0.0972416	4.79705	-2.16438	0.0483208	0.770118
10716785	Rab32	RAB32, member RAS oncogene family	-0.0918409	4.52984	-2.16429	0.0483289	0.770118
10725045	Cyp2r1	cytochrome P450, family 2, subfamily r, polypeptide 1	-0.099685	5.09093	-2.16408	0.0483483	0.770118
10760008	Uspl1	ubiquitin specific peptidase like 1	0.126165	7.44075	2.16265	0.0484772	0.770118
10839674	Mertk	MER proto-oncogene, tyrosine kinase	0.162673	7.45025	2.16091	0.0486345	0.770118
10874282	Tnfrsf25	TNF receptor superfamily member 25	0.146594	5.99977	2.1604	0.0486801	0.770118
10825809	Cd53	Cd53 molecule	-0.160377	7.54793	-2.16022	0.0486968	0.770118
10915740	LOC103690166	zinc finger protein OZF-like	-0.309884	5.13382	-2.16012	0.0487056	0.770118
10907934	Mmp20	matrix metallopeptidase 20	-0.11298	4.10489	-2.15898	0.0488095	0.770118
10878416	Prkaa2	protein kinase AMP-activated catalytic subunit alpha 2	0.125625	8.34185	2.15807	0.0488923	0.770118
10820688	Nsa2	NSA2 ribosome biogenesis factor	-0.0939996	9.90867	-2.15745	0.0489485	0.770118
10927612	Tbc1d8	TBC1 domain family, member 8	-0.132746	6.6363	-2.15707	0.0489835	0.770118
10929874	Hdac4	histone deacetylase 4	0.0973765	7.72406	2.15639	0.0490448	0.770118
10879335	Olr865	olfactory receptor 865	0.0719075	4.29335	2.15568	0.0491103	0.770118
10802128	Rps23	ribosomal protein S23	0.109784	9.44023	2.15542	0.0491339	0.770118
10865732	Kcna1	potassium voltage-gated channel subfamily A member 1	0.0801651	9.8589	2.1542	0.0492455	0.770118
10930873	Rfx2	regulatory factor X2	-0.0871425	5.88271	-2.15412	0.0492528	0.770118
10795253	Abt1	activator of basal transcription 1	0.0819529	6.8423	2.15318	0.0493391	0.770118
10880228	Oprd1	opioid receptor, delta 1	0.127559	6.82987	2.15272	0.0493809	0.770118
10728375	Flrt1	fibronectin leucine rich transmembrane protein 1	0.153921	7.47028	2.15256	0.0493954	0.770118
10719002	Leng8	leukocyte receptor cluster member 8	-0.0955538	8.09492	-2.15239	0.0494111	0.770118
10703075	Map3k4	mitogen activated protein kinase kinase kinase 4	0.0996562	7.16813	2.15205	0.0494425	0.770118
10799812	Trdmt1	tRNA aspartic acid methyltransferase 1	-0.113078	5.88908	-2.15192	0.0494544	0.770118
10879345	Zfp691	zinc finger protein 691	0.0966161	4.43045	2.15179	0.0494662	0.770118
10854685	Tmem178b	transmembrane protein 178B	0.089268	9.08541	2.15143	0.0494997	0.770118
10823591	Trim59	tripartite motif-containing 59	0.215407	5.53663	2.15124	0.0495169	0.770118
10774825	RGD1562229	similar to hypothetical protein FLJ40298	-0.119672	4.68427	-2.15091	0.049548	0.770118
10791401	Cbr4	carbonyl reductase 4	0.151706	7.42442	2.15084	0.049554	0.770118
10706134	Slc7a10	solute carrier family 7 member 10	-0.119211	7.55582	-2.15023	0.0496108	0.770118
10849151	Mfap1a	microfibrillar-associated protein 1A	0.143131	7.47164	2.14977	0.0496526	0.770118
10863187	Rnf181	ring finger protein 181	0.0809182	6.96885	2.14966	0.0496626	0.770118
10815834	Mfsd1	major facilitator superfamily domain containing 1	0.0629521	7.92498	2.1487	0.0497516	0.770231
10800314	Hrh4	histamine receptor H4	0.0808088	4.45681	2.14848	0.0497718	0.770231
10778759	Pex13	peroxisomal biogenesis factor 13	0.0890682	7.85372	2.14808	0.049809	0.770231
10863277	Tcf7l1	transcription factor 7 like 1	0.0738697	6.48771	2.14627	0.0499769	0.771097
10887080	Mir300	microRNA 300	0.148418	4.70574	2.14617	0.0499866	0.771097
10897068	Zfp41	zinc finger protein 41	0.100078	6.4488	2.14598	0.0500043	0.771097
10833598	Fam229b	family with sequence similarity 229, member B	-0.102002	5.40534	-2.14431	0.0501591	0.772767
10817136	RGD1564972	RGD1564972	0.0868239	4.56002	2.14269	0.0503103	0.773895
10703850	Zim1	zinc finger, imprinted 1	-0.409326	4.87535	-2.1424	0.0503381	0.773895
10859296	Emp1	epithelial membrane protein 1	0.16756	5.63727	2.14112	0.0504579	0.773895
10886638	Bdkrb2	bradykinin receptor B2	0.0888298	4.4188	2.14059	0.0505068	0.773895
10737527	Mrpl27	mitochondrial ribosomal protein L27	0.0852966	7.48416	2.13991	0.0505712	0.773895
10721480	Atf5	activating transcription factor 5	0.0761479	5.45594	2.13959	0.0506009	0.773895
10722179	Uevld	UEV and lactate/malate dehyrogenase domains	0.121755	5.23337	2.13955	0.0506051	0.773895
10884309	Dgkb	diacylglycerol kinase, beta	-0.190744	9.76131	-2.13814	0.0507373	0.775203
10743818	Rangrf	RAN guanine nucleotide release factor	0.117184	6.28121	2.13755	0.0507931	0.775342
10876502	Zbtb5	zinc finger and BTB domain containing 5	0.0795426	5.62267	2.1363	0.0509112	0.775744
10781441	Lpar6	lysophosphatidic acid receptor 6	-0.136208	6.87333	-2.13628	0.0509129	0.775744
10906882	Adcy6	adenylate cyclase 6	0.07215	6.91785	2.13439	0.0510916	0.775921
10750848	Nfkbiz	NFKB inhibitor zeta	0.136812	5.27405	2.13399	0.0511297	0.775921
10872131	Tmem35b	transmembrane protein 35B	-0.113494	4.28811	-2.13311	0.0512134	0.775921
10754176	Cd80	Cd80 molecule	0.253807	5.05118	2.13258	0.0512641	0.775921
10790481	Bmpr1a	bone morphogenetic protein receptor type 1A	0.101763	8.79806	2.13256	0.0512657	0.775921
10716480	Grk5	G protein-coupled receptor kinase 5	-0.162306	6.93568	-2.13119	0.0513961	0.775921
10713703	Ints5	integrator complex subunit 5	0.113395	6.40777	2.13108	0.0514063	0.775921
10909948	Pou2af1	POU class 2 homeobox associating factor 1	0.0644171	5.27075	2.13006	0.0515044	0.775921
10940574	LOC257642	rRNA promoter binding protein	-0.119394	8.70171	-2.12996	0.0515133	0.775921
10703751	Oscar	osteoclast associated Ig-like receptor	0.159627	4.61585	2.12994	0.0515155	0.775921
10925127	Dgkd	diacylglycerol kinase, delta	-0.0891696	7.81246	-2.12959	0.0515487	0.775921
10765557	Pfdn2	prefoldin subunit 2	0.0795935	9.51723	2.12934	0.0515729	0.775921
10925991	Myom1	myomesin 1	-0.0913777	4.03796	-2.12928	0.0515785	0.775921
10929153	Resp18	regulated endocrine-specific protein 18	-0.200364	8.27713	-2.12841	0.0516619	0.7762
10757808	Ervfrd-1	endogenous retrovirus group FRD member 1, envelope	0.127728	4.45683	2.12811	0.0516906	0.7762
10857762	Arpc4	actin related protein 2/3 complex, subunit 4	-0.0966647	10.2455	-2.12538	0.0519528	0.776525
10755171	Dnajb11	DnaJ heat shock protein family (Hsp40) member B11	0.0958629	7.87667	2.12499	0.05199	0.776525
10921897	Znrd1as	zinc ribbon domain containing 1 antisense	0.0771552	4.11385	2.1248	0.0520085	0.776525
10878936	Btbd19	BTB domain containing 19	-0.131119	8.18377	-2.12455	0.0520324	0.776525
10863287	Dnah6	dynein, axonemal, heavy chain 6	-0.189615	4.09675	-2.12443	0.0520442	0.776525
10779638	Cdkn3	cyclin-dependent kinase inhibitor 3	-0.153828	4.21897	-2.1236	0.0521243	0.776525
10828303	Egfl8	EGF-like-domain, multiple 8	0.0723535	5.98219	2.12351	0.0521332	0.776525
10750460	Ets2	ETS proto-oncogene 2, transcription factor	0.110667	8.16202	2.12348	0.0521363	0.776525
10731980	Srrm2	serine/arginine repetitive matrix 2	-0.0797843	10.2866	-2.12315	0.0521679	0.776525
10855569	LOC685406	LRRGT00062	0.0981618	4.28945	2.12303	0.0521798	0.776525
10778295	Ddx56	DEAD-box helicase 56	-0.199044	6.4605	-2.12186	0.052293	0.777352
10875119	Vxn	vexin	0.134671	10.5886	2.12149	0.052329	0.777352
10701924	Ifngr1	interferon gamma receptor 1	0.0990564	9.0012	2.12095	0.0523808	0.777426
10845055	Lrp1b	LDL receptor related protein 1B	0.132105	9.07577	2.1198	0.0524928	0.777971
10906819	Asb8	ankyrin repeat and SOCS box-containing 8	-0.0762197	8.73279	-2.11921	0.0525502	0.777971
10898291	Upk3a	uroplakin 3A	0.104894	5.4687	2.11913	0.052558	0.777971
10721145	Zfp507	zinc finger protein 507	-0.128884	6.86333	-2.11846	0.052623	0.77824
10735066	Gps2	G protein pathway suppressor 2	-0.0953063	7.89158	-2.11716	0.0527504	0.778311
10731795	Srl	sarcalumenin	-0.0766085	4.59307	-2.11711	0.0527554	0.778311
10883801	Hpcal1	hippocalcin-like 1	-0.19219	8.95988	-2.1164	0.0528241	0.778311
10783917	Dhrs1	dehydrogenase/reductase 1	-0.139437	8.12839	-2.11618	0.0528459	0.778311
10872024	Col8a2	collagen type VIII alpha 2 chain	-0.084376	4.85521	-2.11498	0.0529638	0.778311
10702695	Esr1	estrogen receptor 1	-0.0810126	4.18398	-2.11461	0.0529996	0.778311
10868151	Gabrr1	gamma-aminobutyric acid type A receptor subunit rho 1	0.106205	4.5385	2.11427	0.053033	0.778311
10779323	Ube2e1	ubiquitin-conjugating enzyme E2E 1	0.105375	7.69249	2.11419	0.0530405	0.778311
10817529	Hist2h2be	histone cluster 2 H2B family member E	0.143179	6.35053	2.1141	0.0530496	0.778311
10831081	RGD1562885	similar to RIKEN cDNA 2300002M23	0.103111	4.90875	2.11318	0.05314	0.778313
10912412	Tfdp2	transcription factor Dp-2	0.112965	7.4156	2.11231	0.0532258	0.778313
10907529	Spryd3	SPRY domain containing 3	0.0871422	9.3916	2.11209	0.0532479	0.778313
10716387	Pnliprp1	pancreatic lipase-related protein 1	0.0814482	4.08128	2.11199	0.0532576	0.778313
10805229	Lipg	lipase G, endothelial type	-0.120287	4.27602	-2.11172	0.0532841	0.778313
10835914	Rabgap1	RAB GTPase activating protein 1	-0.0676014	9.1749	-2.11058	0.0533967	0.778593
10921645	Cul7	cullin 7	-0.0836669	6.79268	-2.10942	0.0535115	0.778593
10808700	Mc1r	melanocortin 1 receptor	0.0669315	4.89967	2.10934	0.0535195	0.778593
10707675	Trpm1	transient receptor potential cation channel, subfamily M, member 1	0.0833862	4.23958	2.10864	0.0535887	0.778593
10840076	Prnp	prion protein	0.0635779	10.3107	2.10854	0.0535979	0.778593
10727683	Bbs1	Bardet-Biedl syndrome 1	-0.0831019	7.78742	-2.10849	0.0536031	0.778593
10864631	Tada3	transcriptional adaptor 3	-0.0832117	7.79845	-2.10821	0.0536314	0.778593
10833823	Sobp	sine oculis binding protein homolog	0.107692	7.86778	2.10772	0.0536796	0.778612
10732966	Adam19	ADAM metallopeptidase domain 19	-0.126062	6.33074	-2.10721	0.05373	0.778664
10906296	Odf3b	outer dense fiber of sperm tails 3B	-0.169788	5.52184	-2.10648	0.0538033	0.779045
10868362	Dnai1	dynein, axonemal, intermediate chain 1	-0.153766	4.68881	-2.10572	0.0538787	0.779241
10725893	Mvp	major vault protein	0.080809	5.19661	2.1052	0.0539304	0.779241
10844849	Psmb7	proteasome 20S subunit beta 7	0.0657866	9.99068	2.10423	0.0540267	0.779241
10900103	Neurod4	neuronal differentiation 4	-0.0781469	4.35284	-2.10399	0.0540514	0.779241
10845676	Gcg	glucagon	0.115672	4.16703	2.1036	0.0540901	0.779241
10793392	Olr1652	olfactory receptor 1652	0.0815668	4.06803	2.10324	0.0541258	0.779241
10870809	Cc2d1b	coiled-coil and C2 domain containing 1B	-0.117352	6.58425	-2.10305	0.0541452	0.779241
10838823	Chac1	ChaC glutathione-specific gamma-glutamylcyclotransferase 1	-0.10942	6.4144	-2.10126	0.0543241	0.781006
10766953	Bcl2	BCL2, apoptosis regulator	-0.139294	7.98327	-2.10041	0.0544099	0.781006
10745424	Ssh2	slingshot protein phosphatase 2	0.0746648	8.01189	2.1001	0.0544411	0.781006
10790317	LOC680885	hypothetical protein LOC680885	-0.22854	4.50765	-2.09939	0.0545123	0.781006
10921343	Rftn1	raftlin lipid raft linker 1	-0.135424	5.3282	-2.09916	0.054536	0.781006
10732789	Pank3	pantothenate kinase 3	0.166113	8.47999	2.09775	0.054678	0.781006
10703975	Tmem150b	transmembrane protein 150B	-0.118022	4.06091	-2.09598	0.0548567	0.781006
10901045	Zfp799	zinc finger protein 799	-0.121549	6.52492	-2.09562	0.0548932	0.781006
10730349	Scd	stearoyl-CoA desaturase	0.126861	7.53409	2.0956	0.054895	0.781006
10719878	Ccdc97	coiled-coil domain containing 97	-0.0803666	7.17779	-2.09472	0.0549841	0.781006
10933525	Nhs	NHS actin remodeling regulator	-0.119049	5.30933	-2.09365	0.055093	0.781006
10805052	Rnmt	RNA (guanine-7-) methyltransferase	0.11498	6.88672	2.09316	0.0551434	0.781006
10842187	Ube2c	ubiquitin-conjugating enzyme E2C	-0.100991	5.68789	-2.09302	0.0551571	0.781006
10867688	Rbm12b	RNA binding motif protein 12B	0.12678	4.4354	2.09252	0.0552078	0.781006
10701949	Map3k5	mitogen-activated protein kinase kinase kinase 5	0.140913	7.56911	2.09226	0.055235	0.781006
10708986	Xrra1	X-ray radiation resistance associated 1	-0.0875283	4.03556	-2.09149	0.0553129	0.781006
10937492	Mageh1	MAGE family member H1	-0.0900825	7.07641	-2.09124	0.0553392	0.781006
10854660	Rab19	RAB19, member RAS oncogene family	0.0671549	4.77806	2.0911	0.0553534	0.781006
10832460	Zfp280b	zinc finger protein 280B	-0.127639	7.09287	-2.09094	0.0553696	0.781006
10886832	Mir665	microRNA 665	-0.134534	5.24017	-2.09045	0.0554198	0.781006
10890886	Zfp36l1	zinc finger protein 36, C3H type-like 1	-0.104748	7.53027	-2.09013	0.0554524	0.781006
10910431	Stra6	signaling receptor and transporter of retinol STRA6	-0.312693	5.54963	-2.0901	0.0554552	0.781006
10937525	Maged2	MAGE family member D2	-0.107754	7.63949	-2.08982	0.0554841	0.781006
10744376	Bcl6b	BCL6B, transcription repressor	-0.20973	5.44137	-2.08926	0.0555409	0.781006
10844103	Dync2i2	dynein 2 intermediate chain 2	0.0930162	6.09824	2.08898	0.0555698	0.781006
10853852	ST7	suppression of tumorigenicity 7	0.0987075	7.6766	2.08884	0.0555846	0.781006
10840353	Banf2	BANF family member 2	-0.0733739	4.28444	-2.08749	0.055723	0.782058
10849110	Catsper2	cation channel, sperm associated 2	0.120308	5.10698	2.08665	0.0558094	0.782058
10814156	Zfp455	zinc finger protein 455	0.125707	5.66668	2.0863	0.0558448	0.782058
10896177	Polr2k	RNA polymerase II, I and III subunit K	0.0821899	7.82697	2.08551	0.0559264	0.782058
10812470	Serinc5	serine incorporator 5	0.151487	8.34834	2.08548	0.05593	0.782058
10769715	Uap1	UDP-N-acetylglucosamine pyrophosphorylase 1	0.157425	7.53052	2.08504	0.0559756	0.782058
10934312	Foxo4	forkhead box O4	0.100939	5.35744	2.0849	0.0559891	0.782058
10921083	LOC367195	similar to 60S RIBOSOMAL PROTEIN L7	-0.100675	5.36095	-2.0844	0.056041	0.782125
10771179	Abcg3	ATP-binding cassette, subfamily G (WHITE), member 3	-0.100436	4.0935	-2.08273	0.0562135	0.783394
10847924	Tcp11l1	t-complex 11 like 1	0.0854299	8.70917	2.08254	0.0562339	0.783394
10927427	Tmem131	transmembrane protein 131	-0.0641321	8.52638	-2.0821	0.0562795	0.783394
10729074	Tle4	TLE family member 4, transcriptional corepressor	-0.0895713	9.02812	-2.08128	0.0563642	0.783394
10885524	Plekhh1	pleckstrin homology, MyTH4 and FERM domain containing H1	0.168122	6.38181	2.08125	0.0563678	0.783394
10881216	Fhad1	forkhead associated phosphopeptide binding domain 1	-0.0688365	4.5892	-2.08075	0.0564189	0.783448
10885490	Fam71d	family with sequence similarity 71, member D	0.0990998	4.32579	2.07927	0.0565733	0.784401
10719674	Tex101	testis expressed 101	-0.0803781	4.14302	-2.07886	0.0566159	0.784401
10787520	Ssbp4	single stranded DNA binding protein 4	-0.0853745	9.35895	-2.07799	0.0567074	0.784401
10793675	Ctla2a	cytotoxic T lymphocyte-associated protein 2 alpha	-0.124962	5.06001	-2.07786	0.0567203	0.784401
10897741	Tab1	TGF-beta activated kinase 1/MAP3K7 binding protein 1	-0.0766154	7.19333	-2.07783	0.0567236	0.784401
10847693	Api5	apoptosis inhibitor 5	0.094969	8.52587	2.07671	0.0568412	0.784741
10743774	Ntn1	netrin 1	-0.238319	6.10551	-2.07652	0.0568602	0.784741
10792621	Myom2	myomesin 2	0.117416	4.29775	2.07597	0.0569185	0.784741
10769180	Zbtb37	zinc finger and BTB domain containing 37	0.0657316	5.85128	2.07579	0.0569372	0.784741
10755632	Tssk2	testis-specific serine kinase 2	-0.0769497	4.4611	-2.07432	0.0570914	0.786213
10864848	Alox5	arachidonate 5-lipoxygenase	0.202291	5.03249	2.07386	0.0571393	0.786221
10798135	Serpinb9	serpin family B member 9	-0.154259	6.70618	-2.07245	0.0572877	0.787224
10859807	Dnajb6	DnaJ heat shock protein family (Hsp40) member B6	0.0890876	7.23176	2.07204	0.0573311	0.787224
10708338	Sh3gl3	SH3 domain containing GRB2 like 3, endophilin A3	0.0961165	7.90898	2.07182	0.0573543	0.787224
10913129	Cdhr4	cadherin-related family member 4	-0.348903	5.7543	-2.07087	0.0574545	0.787805
10837241	Zfp804a	zinc finger protein 804A	-0.244978	7.54235	-2.07052	0.0574916	0.787805
10940462	Gtf2a2	general transcription factor 2A subunit 2	-0.0934106	7.21536	-2.06889	0.0576649	0.789529
10826691	Ap1ar	adaptor-related protein complex 1 associated regulatory protein	-0.110682	10.2142	-2.06793	0.0577664	0.790268
10750825	Nxpe3	neurexophilin and PC-esterase domain family, member 3	0.092441	6.55614	2.06564	0.0580104	0.791417
10869106	Slc44a1	solute carrier family 44 member 1	0.112714	9.38472	2.06561	0.0580129	0.791417
[truncated: 14,421 more rows]

## Sheet: S5 limma 24h
Table S5: Summary of limma statistics from differential expression analysis between stress and non stress rats 24 hours after stress
[truncated: 18,861 more rows]

[truncated: 5 more sheets: S6 GO BP 2h, S7 KEGG 2h, S8 GO BP 24h, S9 KEGG 24h, S10 TF targets]
